# Supplementary material for: HspB8 prevents aberrant phase transitions of FUS by chaperoning its folded RNA-binding domain
Source: eLife journal article supplement (doi:10.7554/elife.69377), 2021-09-06

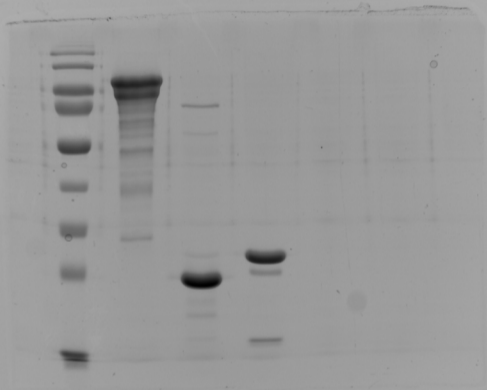

Supplement: supp [file elife-69377-supp-v1.zip]
