# Supplementary material for: HspB8 prevents aberrant phase transitions of FUS by chaperoning its folded RNA-binding domain
Source: eLife. 2021 Sep 6;10:e69377. doi: 10.7554/eLife.69377 (PMC8510580; doi:10.7554/eLife.69377)
Supplement: Supplementary file 1. [file elife-69377-supp1.xlsx]

## Sheet: Legend
Legends for Supplemental Data 1
Supplemental Table 1. FUS Salt 1 Experiment Crosslink Identification. Related to Figure 1A, 1B, S1A
Supplemental Table 2. FUS Salt 1 Experiment Crosslink Quantification. Related to Figure 1A, 1B, S1A
Supplemental Table 3. FUS Salt 2 Experiment Crosslink Identification. Related to Figure 1A, 1B
Supplemental Table 4. FUS Salt 2 Experiment Crosslink Quantification. Related to Figure 1A, 1B
Supplemental Table 5. FUS Salt 3 Experiment Crosslink Identification. Related to Figure 1A, 1B
Supplemental Table 6. FUS Salt 3 Experiment Crosslink Quantification. Related to Figure 1A, 1B
Legend referring to Tables S1, S3 and S5
uxID	unique lysine to lysine crosslinking site, includes crosslinked protein names and absolute position of crosslinked lysine. All peptides linking the same lysines (different cleavage sites, charge states and heavy/light pairs) belong to a single uxID
Id	amino acid sequence of crosslinked peptide a and peptide b including the position of crosslinking sites in peptide a and peptide b
Protein1	name of protein to which peptide a belongs
Protein2	name of protein to which peptide b belongs
XLType	type of linker attachment (inter-protein crosslink, intra-protein crosslink, looplink or monolink).Looplink, a link between two lysines within one peptide.
AbsPos1	absolute position of crosslinked lysine residue in protein 1 (including 5 AA N-terminal tag)
AbsPos2	absolute position of crosslinked lysine residue in protein 2 (including 5 AA N-terminal tag)
deltaS	deltaS score is a measure for how close the best assigned hit scored in regard to second best
ld-Score	linear discriminant score; scoring scheme to discriminate between true positive crosslinks and false positive hits																									FDR	FDR	FDR	FDR	FDR	FDR	FDR	FDR	FDR	FDR	FDR	FDR	FDR	FDR	FDR	FDR	FDR	FDR	FDR	FDR	FDR	FDR	FDR	FDR
FDR	FDR was calculated by xProphet as described (Leitner et al., Nat Protoc, 2014). FDR filtering was done on the uxID level and only uxIDs with an FDR ≤ 0.05 in at least one replicate were considered
No of Ids in triplicates	indicates in how many of three replicates the corresponding uxID was identified
Legend referring to Tables S2, S4 and S6
uxID	unique lysine to lysine crosslinking site, includes crosslinked protein names and absolute position of crosslinked lysine. All peptides linking the same lysines (different cleavage sites, charge states and heavy/light pairs) belong to a single uxID
experiment	the condition used for relative quantification relative to the reference condition
link_type	type of linker attachment (inter-protein crosslink, intra-protein crosslink, looplink or monolink).Looplink, a link between two lysines within one peptide.
ms1_area_sum	log2 converted peak area of the extracted total ion chromatogram (MS1 intensity along retention time) for the corresponding uxID within an experiment. Peak areas of different peptides connecting the same lysines are summed up but for a light/heavy pair as well as biological replicates of the same peptide the mean is taken.
imputed	a value between 0-2 indicating the fraction of imputed peptide observations for a given uxID corresponding to the current experiment condition
ms1_area_sum_ref	log2 converted peak area of the extracted total ion chromatogram (MS1 intensity along retention time) for the corresponding uxID within the reference experiment. Peak areas of different peptides connecting the same lysines are summed up but for a light/heavy pair as well as biological replicates of the same peptide the mean is taken.
imputed_ref	a value between 0-2 indicating the fraction of imputed peptide observations for a given uxID corresponding to the reference experiment condition
log2ratio	the log2 ratio of the experiment vs. the reference experiment. Calculated as difference between ms1_area_sum and ms1_area_sum_ref
reference experiment	the condition which was used as reference for relative quantification
pvalue	p-value as calculated by a two-sided t-test using the peptide observations of the log2 converted peak area of the experiment and reference experiment as input (light/heavy pairs and biological replicates as input observations)
FDR	p-values corrected for multiple testing following the Benjamini–Hochberg procedure
[truncated: 5,000 more columns]

## Sheet: Table S1
Supplemental Table 1. FUS Salt 1 Experiment Crosslink Identification. Related to Figure 1A, 1B, S1A
Crosslinks were only considered, if they were identified in two out of three replicates with a deltaS < 0.95, a minimum Id score ≥ 20 and an ld score ≥ 25 in at least one replicate (filtering was done on the level of the unique crosslinking site) and an FDR < 0.05 as calculated by xProphet for at least one replicate.
Only the highest scoring crosslink from three replicates is shown.
uxID	Id	Protein1	Protein2	XLType	AbsPos1	AbsPos2	deltaS	ld-Score	FDR	No of Ids in triplicates	Salt Concentration
FUS:269:x:FUS:317	GGFNKFGGPR-QIGIIKTNK-a5-b6	FUS	FUS	intra-protein link	269	317	0.55	31.93	0	3	500 mM KCl
FUS:269:x:FUS:321	KTGQPMINLYTDR-GGFNKFGGPR-a1-b5	FUS	FUS	intra-protein link	321	269	0	34.99	0	2	500 mM KCl
FUS:269:x:FUS:339	LKGEATVSFDDPPSAK-GGFNKFGGPR-a2-b5	FUS	FUS	intra-protein link	339	269	0.3	41.54	0	3	75 mM KCl
FUS:269:x:FUS:339	LKGEATVSFDDPPSAK-GGFNKFGGPR-a2-b5	FUS	FUS	intra-protein link	339	269	0.35	40.28	0	3	500 mM KCl
FUS:269:x:FUS:362	AAIDWFDGKEFSGNPIK-GGFNKFGGPR-a9-b5	FUS	FUS	intra-protein link	362	269	0.46	41.57	0	3	500 mM KCl
FUS:269:x:FUS:362	AAIDWFDGKEFSGNPIK-GGFNKFGGPR-a9-b5	FUS	FUS	intra-protein link	362	269	0.41	31.74	0	3	75 mM KCl
FUS:269:x:FUS:370	EFSGNPIKVSFATR-GGFNKFGGPR-a8-b5	FUS	FUS	intra-protein link	370	269	0	34.71	0	3	75 mM KCl
FUS:269:x:FUS:370	EFSGNPIKVSFATR-GGFNKFGGPR-a8-b5	FUS	FUS	intra-protein link	370	269	0	29.96	0	3	500 mM KCl
FUS:269:x:FUS:515	GGFGPGKMDSR-GGFNKFGGPR-a7-b5	FUS	FUS	intra-protein link	515	269	0	46.93	0	2	75 mM KCl
FUS:269:x:FUS:515	GGFGPGKMDSR-GGFNKFGGPR-a7-b5	FUS	FUS	intra-protein link	515	269	0.68	43.72	0	3	500 mM KCl
FUS:311	HDSEQDNSDNNTIFVQGLGENVTIESVADYFKQIGIIK-K32-155	FUS	-	monolink	311		0	42.34	0	3	500 mM KCl
FUS:311	HDSEQDNSDNNTIFVQGLGENVTIESVADYFKQIGIIK-K32-155	FUS	-	monolink	311		0.04	33.01	0	3	75 mM KCl
FUS:317:x:FUS:321	KTGQPMINLYTDR-QIGIIKTNK-a1-b6	FUS	FUS	intra-protein link	321	317	0	34.28	0	3	75 mM KCl
FUS:317:x:FUS:321	KTGQPMINLYTDR-QIGIIKTNK-a1-b6	FUS	FUS	intra-protein link	321	317	0	33.03	0	3	500 mM KCl
FUS:317:x:FUS:339	LKGEATVSFDDPPSAK-QIGIIKTNK-a2-b6	FUS	FUS	intra-protein link	339	317	0.81	29.25	0	3	75 mM KCl
FUS:317:x:FUS:362	AAIDWFDGKEFSGNPIK-QIGIIKTNK-a9-b6	FUS	FUS	intra-protein link	362	317	0.84	25.07	0	2	75 mM KCl
FUS:320:x:FUS:321	TNKKTGQPMINLYTDR-K3-K4	FUS	-	looplink	320	321	0	36.29	0	3	75 mM KCl
FUS:320:x:FUS:321	TNKKTGQPMINLYTDR-K3-K4	FUS	-	looplink	320	321	0	33.77	0	2	500 mM KCl
FUS:321	KTGQPMINLYTDR-K1-156	FUS	-	monolink	321		0	34.7	0	3	500 mM KCl
FUS:321:x:FUS:339	LKGEATVSFDDPPSAK-KTGQPMINLYTDR-a2-b1	FUS	FUS	intra-protein link	339	321	0	33.32	0	2	75 mM KCl
FUS:321:x:FUS:339	LKGEATVSFDDPPSAK-KTGQPMINLYTDR-a2-b1	FUS	FUS	intra-protein link	339	321	0	33.14	0	3	500 mM KCl
FUS:321:x:FUS:362	AAIDWFDGKEFSGNPIK-KTGQPMINLYTDR-a9-b1	FUS	FUS	intra-protein link	362	321	0.12	38.05	0	3	75 mM KCl
FUS:321:x:FUS:362	AAIDWFDGKEFSGNPIK-KTGQPMINLYTDR-a9-b1	FUS	FUS	intra-protein link	362	321	0.3	30.08	0	2	500 mM KCl
FUS:337	ETGKLKGEATVSFDDPPSAK-K4-155	FUS	-	monolink	337		0	40.77	0	3	75 mM KCl
FUS:337	ETGKLKGEATVSFDDPPSAK-K4-156	FUS	-	monolink	337		0	39.43	0	3	75 mM KCl
FUS:337	ETGKLKGEATVSFDDPPSAK-K4-155	FUS	-	monolink	337		0	38.19	0	3	500 mM KCl
FUS:337:x:FUS:339	ETGKLKGEATVSFDDPPSAK-K4-K6	FUS	-	looplink	337	339	0	39.77	0	3	500 mM KCl
FUS:337:x:FUS:339	ETGKLKGEATVSFDDPPSAK-K4-K6	FUS	-	looplink	337	339	0	38.7	0	3	75 mM KCl
FUS:337:x:FUS:339	ETGKLKGEATVSFDDPPSAK-K4-K6	FUS	-	looplink	337	339	0	36.42	0	3	75 mM KCl
FUS:337:x:FUS:339	LKGEATVSFDDPPSAK-ETGKLK-a2-b4	FUS	FUS	intra-protein link	339	337	0.18	33.96	0	2	75 mM KCl
FUS:337:x:FUS:339	LKGEATVSFDDPPSAK-ETGKLK-a2-b4	FUS	FUS	intra-protein link	339	337	0.36	25.51	0	2	500 mM KCl
FUS:337:x:FUS:370	EFSGNPIKVSFATR-ETGKLK-a8-b4	FUS	FUS	intra-protein link	370	337	0	30.55	0	2	500 mM KCl
FUS:337:x:FUS:370	EFSGNPIKVSFATR-ETGKLK-a8-b4	FUS	FUS	intra-protein link	370	337	0.24	26.76	0	3	75 mM KCl
FUS:339	LKGEATVSFDDPPSAK-K2-155	FUS	-	monolink	339		0.11	42.58	0	3	500 mM KCl
FUS:339	LKGEATVSFDDPPSAK-K2-156	FUS	-	monolink	339		0	41.89	0	3	75 mM KCl
FUS:339	LKGEATVSFDDPPSAK-K2-156	FUS	-	monolink	339		0.09	41.52	0	3	75 mM KCl
FUS:339:x:FUS:362	AAIDWFDGKEFSGNPIK-LKGEATVSFDDPPSAK-a9-b2	FUS	FUS	intra-protein link	362	339	0.56	37.18	0	3	75 mM KCl
FUS:339:x:FUS:362	AAIDWFDGKEFSGNPIK-LKGEATVSFDDPPSAK-a9-b2	FUS	FUS	intra-protein link	362	339	0.52	34.49	0	3	500 mM KCl
FUS:339:x:FUS:370	AAIDWFDGKEFSGNPIKVSFATR-LKGEATVSFDDPPSAK-a17-b2	FUS	FUS	intra-protein link	370	339	0.63	38.12	0	3	500 mM KCl
FUS:339:x:FUS:370	LKGEATVSFDDPPSAK-EFSGNPIKVSFATR-a2-b8	FUS	FUS	intra-protein link	339	370	0	33.99	0	3	75 mM KCl
FUS:339:x:FUS:453	NECNQCKAPKPDGPGGGPGGSHMGGNYGDDR-LKGEATVSFDDPPSAK-a7-b2	FUS	FUS	intra-protein link	453	339	0.81	27.94	0	2	500 mM KCl
FUS:339:x:FUS:456	APKPDGPGGGPGGSHMGGNYGDDR-LKGEATVSFDDPPSAK-a3-b2	FUS	FUS	intra-protein link	456	339	0.29	30.08	0	3	500 mM KCl
FUS:339:x:FUS:456	APKPDGPGGGPGGSHMGGNYGDDR-LKGEATVSFDDPPSAK-a3-b2	FUS	FUS	intra-protein link	456	339	0.3	25.91	0	2	75 mM KCl
FUS:339:x:FUS:515	LKGEATVSFDDPPSAK-GGFGPGKMDSR-a2-b7	FUS	FUS	intra-protein link	339	515	0	40.06	0	3	75 mM KCl
FUS:339:x:FUS:515	LKGEATVSFDDPPSAK-GGFGPGKMDSR-a2-b7	FUS	FUS	intra-protein link	339	515	0.41	39.03	0	3	500 mM KCl
FUS:339:x:FUS:515	LKGEATVSFDDPPSAK-GGFGPGKMDSR-a2-b7	FUS	FUS	intra-protein link	339	515	0.38	34.47	0	3	75 mM KCl
FUS:353	GEATVSFDDPPSAKAAIDWFDGK-K14-155	FUS	-	monolink	353		0.22	34.5	0	3	500 mM KCl
FUS:353	GEATVSFDDPPSAKAAIDWFDGK-K14-155	FUS	-	monolink	353		0.08	26.83	0	3	75 mM KCl
FUS:362	AAIDWFDGKEFSGNPIK-K9-155	FUS	-	monolink	362		0	50.84	0	3	75 mM KCl
FUS:362	AAIDWFDGKEFSGNPIK-K9-155	FUS	-	monolink	362		0	50.54	0	3	500 mM KCl
FUS:362:x:FUS:362	AAIDWFDGKEFSGNPIK-AAIDWFDGKEFSGNPIK-a9-b9	FUS	FUS	intra-protein link	362	362	0	39.29	0	3	500 mM KCl
FUS:362:x:FUS:370	AAIDWFDGKEFSGNPIKVSFATR-K9-K17	FUS	-	looplink	362	370	0	33.6	0	3	500 mM KCl
FUS:362:x:FUS:370	AAIDWFDGKEFSGNPIKVSFATR-K9-K17	FUS	-	looplink	362	370	0	32.16	0	3	75 mM KCl
FUS:362:x:FUS:370	AAIDWFDGKEFSGNPIK-EFSGNPIKVSFATR-a9-b8	FUS	FUS	intra-protein link	362	370	0.6	30.06	0	2	75 mM KCl
FUS:362:x:FUS:515	AAIDWFDGKEFSGNPIK-GGFGPGKMDSR-a9-b7	FUS	FUS	intra-protein link	362	515	0.14	45.87	0	3	75 mM KCl
FUS:362:x:FUS:515	AAIDWFDGKEFSGNPIK-GGFGPGKMDSR-a9-b7	FUS	FUS	intra-protein link	362	515	0.51	44.53	0	3	500 mM KCl
FUS:370	AAIDWFDGKEFSGNPIKVSFATR-K17-156	FUS	-	monolink	370		0	48.9	0	3	500 mM KCl
FUS:370	EFSGNPIKVSFATR-K8-156	FUS	-	monolink	370		0	48.41	0	3	75 mM KCl
FUS:370:x:FUS:370	EFSGNPIKVSFATR-EFSGNPIKVSFATR-a8-b8	FUS	FUS	intra-protein link	370	370	0	33.56	0	3	75 mM KCl
FUS:370:x:FUS:515	EFSGNPIKVSFATR-GGFGPGKMDSR-a8-b7	FUS	FUS	intra-protein link	370	515	0	32.6	0	3	75 mM KCl
FUS:370:x:FUS:515	EFSGNPIKVSFATR-GGFGPGKMDSR-a8-b7	FUS	FUS	intra-protein link	370	515	0	31.86	0	3	500 mM KCl
FUS:432	AGDWKCPNPTCENMNFSWR-K5-155	FUS	-	monolink	432		0.1	46.56	0	3	500 mM KCl
FUS:432	AGDWKCPNPTCENMNFSWR-K5-156	FUS	-	monolink	432		0	28.56	0	2	75 mM KCl
FUS:453	NECNQCKAPKPDGPGGGPGGSHMGGNYGDDR-K7-155	FUS	-	monolink	453		0	37.91	0	3	500 mM KCl
FUS:453	NECNQCKAPKPDGPGGGPGGSHMGGNYGDDR-K7-155	FUS	-	monolink	453		-0.01	31.44	0	3	75 mM KCl
FUS:453	NECNQCKAPKPDGPGGGPGGSHMGGNYGDDR-K7-155	FUS	-	monolink	453		0.09	31.06	0	3	75 mM KCl
FUS:453:x:FUS:456	NECNQCKAPKPDGPGGGPGGSHMGGNYGDDR-K7-K10	FUS	-	looplink	453	456	0.02	28.44	0	3	500 mM KCl
FUS:453:x:FUS:456	NECNQCKAPKPDGPGGGPGGSHMGGNYGDDR-K7-K10	FUS	-	looplink	453	456	0.04	27.94	0	2	75 mM KCl
FUS:453:x:FUS:456	NECNQCKAPKPDGPGGGPGGSHMGGNYGDDR-K7-K10	FUS	-	looplink	453	456	0.01	26.71	0	2	75 mM KCl
FUS:456	APKPDGPGGGPGGSHMGGNYGDDR-K3-155	FUS	-	monolink	456		0	36.87	0	3	500 mM KCl
FUS:456	APKPDGPGGGPGGSHMGGNYGDDRR-K3-156	FUS	-	monolink	456		0	30.92	0	3	75 mM KCl
FUS:456:x:FUS:515	APKPDGPGGGPGGSHMGGNYGDDR-GGFGPGKMDSR-a3-b7	FUS	FUS	intra-protein link	456	515	0.32	27.52	0	2	75 mM KCl
FUS:515:x:FUS:515	GGFGPGKMDSR-GGFGPGKMDSR-a7-b7	FUS	FUS	intra-protein link	515	515	0	38.08	0	2	500 mM KCl
FUS:515:x:FUS:515	GGFGPGKMDSR-GGFGPGKMDSR-a7-b7	FUS	FUS	intra-protein link	515	515	0	36.43	0	2	75 mM KCl

## Sheet: Table S2
Supplemental Table 2. FUS Salt 1 Experiment Crosslink Quantification. Related to Figure 1A, 1B, S1A
Quantifiaction for each unique crosslinking site shown in Table S1
uxID	experiment	link_type	ms1_area_sum	imputed	ms1_area_sum_ref	imputed_ref	log2ratio	reference experiment	pvalue	FDR
FUS:269:x:FUS:317	75 mM KCl	xlink	21.7092	1	23.3214	0	-1.61223	500 mM KCl	0.000544836	0.00196979
FUS:269:x:FUS:321	75 mM KCl	xlink	21.8667	1	22.8988	0	-1.0321	500 mM KCl	0.0335942	0.0657887
FUS:269:x:FUS:339	75 mM KCl	xlink	28.259	0	28.0014	0	0.257523	500 mM KCl	0.165159	0.221785
FUS:269:x:FUS:362	75 mM KCl	xlink	26.1811	0	26.8611	0	-0.67995	500 mM KCl	2.86902e-05	0.000146643
FUS:269:x:FUS:370	75 mM KCl	xlink	27.2046	0	26.4939	0	0.710636	500 mM KCl	0.000507551	0.00196979
FUS:269:x:FUS:515	75 mM KCl	xlink	21.9112	1	24.9247	0	-3.01346	500 mM KCl	7.9725e-06	6.24513e-05
FUS:311	75 mM KCl	monolink	25.9822	0	23.9533	0	2.02886	500 mM KCl	0.00942425	0.0276837
FUS:311:x:FUS:317	75 mM KCl	looplink	21.3564	0.166667	21.3749	1	-0.0185059	500 mM KCl	0.540331	0.590595
FUS:317:x:FUS:321	75 mM KCl	xlink	32.865	0	32.6967	0	0.168273	500 mM KCl	0.0167485	0.0393591
FUS:317:x:FUS:339	75 mM KCl	xlink	27.6834	0	25.8597	0	1.82365	500 mM KCl	1.53963e-06	1.80906e-05
FUS:317:x:FUS:362	75 mM KCl	xlink	25.8277	0	24.6767	0	1.15104	500 mM KCl	0.00343817	0.0112712
FUS:317:x:FUS:515	75 mM KCl	xlink	21.6768	1	21.6316	1	0.0452008	500 mM KCl	0.939531	0.959956
FUS:320:x:FUS:321	75 mM KCl	looplink	25.1214	0	26.103	0	-0.981597	500 mM KCl	0.194598	0.237749
FUS:321	75 mM KCl	monolink	27.4612	0	28.3106	0	-0.849379	500 mM KCl	0.0196258	0.0439245
FUS:321:x:FUS:339	75 mM KCl	xlink	26.7336	0	24.6774	0	2.05623	500 mM KCl	1.05341e-07	2.47552e-06
FUS:321:x:FUS:362	75 mM KCl	xlink	26.1451	0	25.2399	0	0.905251	500 mM KCl	0.0712294	0.123992
FUS:321:x:FUS:515	75 mM KCl	xlink	21.1592	1	21.9179	1	-0.75865	500 mM KCl	0.11828	0.173724
FUS:337	75 mM KCl	monolink	30.9044	0	30.6538	0	0.250641	500 mM KCl	0.506377	0.56666
FUS:337:x:FUS:339	75 mM KCl	looplink	31.3755	0	30.925	0	0.450534	500 mM KCl	0.0532751	0.0963049
FUS:337:x:FUS:339	75 mM KCl	xlink	27.2485	0	23.4659	0	3.78259	500 mM KCl	4.90176e-10	2.30383e-08
FUS:337:x:FUS:362	75 mM KCl	xlink	24.7293	0	23.1806	0	1.54866	500 mM KCl	0.0123376	0.0341099
FUS:337:x:FUS:370	75 mM KCl	xlink	29.1754	0	27.5032	0	1.67225	500 mM KCl	6.04063e-07	9.46365e-06
FUS:339	75 mM KCl	monolink	28	1	28.6757	1	-0.675737	500 mM KCl	0.98992	0.98992
FUS:339:x:FUS:362	75 mM KCl	xlink	28.3846	0	28.2339	0	0.150701	500 mM KCl	0.458256	0.525318
FUS:339:x:FUS:370	75 mM KCl	xlink	30.1241	0	29.5879	0	0.536189	500 mM KCl	0.014267	0.0352921
FUS:339:x:FUS:453	75 mM KCl	xlink	22.0282	1	22.4235	0.166667	-0.395276	500 mM KCl	0.0793234	0.128559
FUS:339:x:FUS:456	75 mM KCl	xlink	24.3516	0	25.2602	0	-0.908585	500 mM KCl	0.197281	0.237749
FUS:339:x:FUS:515	75 mM KCl	xlink	27.527	0	26.6032	0	0.923816	500 mM KCl	1.42427e-05	8.36761e-05
FUS:353	75 mM KCl	monolink	27.7535	0	27.2039	0	0.54955	500 mM KCl	0.0763573	0.128171
FUS:362	75 mM KCl	monolink	29.6763	0	30.1408	0	-0.464505	500 mM KCl	0.0869376	0.136202
FUS:362:x:FUS:362	75 mM KCl	xlink	21.3793	0.583333	23.3489	0.0833333	-1.96956	500 mM KCl	0.0264951	0.0566032
FUS:362:x:FUS:370	75 mM KCl	looplink	26.6808	0	21.3308	0	5.34994	500 mM KCl	2.78916e-06	2.62181e-05
FUS:362:x:FUS:370	75 mM KCl	xlink	25.5597	0	23.8986	0	1.66106	500 mM KCl	0.0436646	0.0820895
FUS:362:x:FUS:456	75 mM KCl	xlink	21.1318	0.5	21.834	1	-0.702197	500 mM KCl	0.191874	0.237749
FUS:362:x:FUS:515	75 mM KCl	xlink	27.0578	0	27.3107	0	-0.252887	500 mM KCl	0.37365	0.439039
FUS:370	75 mM KCl	monolink	29.8471	0	29.5193	0	0.327804	500 mM KCl	0.675841	0.705879
FUS:370:x:FUS:370	75 mM KCl	xlink	23.6725	0	21.8855	1	1.78694	500 mM KCl	0.0279645	0.0571449
FUS:370:x:FUS:515	75 mM KCl	xlink	26.7053	0	24.3296	0	2.37571	500 mM KCl	0.000221727	0.000947381
FUS:432	75 mM KCl	monolink	25.9271	0.166667	29.2018	0	-3.27466	500 mM KCl	1.1725e-05	7.8725e-05
FUS:432:x:FUS:456	75 mM KCl	xlink	21.2506	1	23.0122	0	-1.76155	500 mM KCl	0.00359718	0.0112712
FUS:432:x:FUS:515	75 mM KCl	xlink	21.7745	1	23.8795	0	-2.10504	500 mM KCl	0.0138112	0.0352921
FUS:453	75 mM KCl	monolink	31.3585	0	31.6881	0	-0.329646	500 mM KCl	0.113423	0.171964
FUS:453:x:FUS:456	75 mM KCl	looplink	31.4505	0	32.5838	0	-1.13328	500 mM KCl	3.12007e-05	0.000146643
FUS:453:x:FUS:515	75 mM KCl	xlink	21.1883	1	22.0016	0.166667	-0.813314	500 mM KCl	0.173638	0.226694
FUS:456	75 mM KCl	monolink	32.5976	0	32.8851	0	-0.287507	500 mM KCl	0.163135	0.221785
FUS:456:x:FUS:515	75 mM KCl	xlink	25.1199	0	25.414	0	-0.29406	500 mM KCl	0.668103	0.705879
FUS:515:x:FUS:515	75 mM KCl	xlink	23.0983	0	24.5908	0	-1.49251	500 mM KCl	0.123142	0.175384

## Sheet: Table S3
Supplemental Table 3. FUS Salt 2 Experiment Crosslink Identification. Related to Figure 1A, 1B
Crosslinks were only considered, if they were identified in two out of three replicates with a deltaS < 0.95, a minimum Id score ≥ 20 and an ld score ≥ 25 in at least one replicate (filtering was done on the level of the unique crosslinking site) and an FDR < 0.05 as calculated by xProphet for at least one replicate.
Only the highest scoring crosslink from three replicates is shown.
uxID	Id	Protein1	Protein2	XLType	AbsPos1	AbsPos2	deltaS	ld-Score	FDR	Salt Concentration	No of Ids in triplicates
FUS:269	GGFNKFGGPRDQGSR-K5-156	FUS	-	monolink	269		0.38	28.26	0	FUS 75 mM KCl	3
FUS:269	GGFNKFGGPRDQGSR-K5-156	FUS	-	monolink	269		0.27	26.46	0	FUS 500 mM KCl	3
FUS:269:x:FUS:317	GGFNKFGGPR-QIGIIKTNK-a5-b6	FUS	FUS	intra-protein link	269	317	0.66	38.86	0	FUS 500 mM KCl	3
FUS:269:x:FUS:317	GGFNKFGGPR-QIGIIKTNK-a5-b6	FUS	FUS	intra-protein link	269	317	0.63	38.38	0	FUS 75 mM KCl	3
FUS:269:x:FUS:321	KTGQPMINLYTDR-GGFNKFGGPR-a1-b5	FUS	FUS	intra-protein link	321	269	0	39.81	0	FUS 500 mM KCl	3
FUS:269:x:FUS:321	KTGQPMINLYTDR-GGFNKFGGPR-a1-b5	FUS	FUS	intra-protein link	321	269	0	35.65	0	FUS 75 mM KCl	3
FUS:269:x:FUS:339	LKGEATVSFDDPPSAK-GGFNKFGGPR-a2-b5	FUS	FUS	intra-protein link	339	269	0	43.67	0	FUS 500 mM KCl	3
FUS:269:x:FUS:339	LKGEATVSFDDPPSAK-GGFNKFGGPR-a2-b5	FUS	FUS	intra-protein link	339	269	0.4	42.14	0	FUS 75 mM KCl	3
FUS:269:x:FUS:362	AAIDWFDGKEFSGNPIK-GGFNKFGGPR-a9-b5	FUS	FUS	intra-protein link	362	269	0.42	49.32	0	FUS 500 mM KCl	3
FUS:269:x:FUS:362	AAIDWFDGKEFSGNPIK-GGFNKFGGPR-a9-b5	FUS	FUS	intra-protein link	362	269	0.5	48.76	0	FUS 75 mM KCl	3
FUS:269:x:FUS:370	EFSGNPIKVSFATR-GGFNKFGGPR-a8-b5	FUS	FUS	intra-protein link	370	269	0	37.07	0	FUS 75 mM KCl	3
FUS:269:x:FUS:370	EFSGNPIKVSFATR-GGFNKFGGPR-a8-b5	FUS	FUS	intra-protein link	370	269	0	36.75	0	FUS 500 mM KCl	3
FUS:269:x:FUS:432	AGDWKCPNPTCENMNFSWR-GGFNKFGGPR-a5-b5	FUS	FUS	intra-protein link	432	269	0	47.43	0	FUS 75 mM KCl	3
FUS:269:x:FUS:432	AGDWKCPNPTCENMNFSWR-GGFNKFGGPR-a5-b5	FUS	FUS	intra-protein link	432	269	0	40.37	0	FUS 500 mM KCl	3
FUS:269:x:FUS:453	NECNQCKAPKPDGPGGGPGGSHMGGNYGDDR-GGFNKFGGPR-a7-b5	FUS	FUS	intra-protein link	453	269	0	44.68	0	FUS 75 mM KCl	3
FUS:269:x:FUS:453	NECNQCKAPKPDGPGGGPGGSHMGGNYGDDR-GGFNKFGGPR-a7-b5	FUS	FUS	intra-protein link	453	269	0.51	35.53	0	FUS 500 mM KCl	3
FUS:269:x:FUS:515	GGFGPGKMDSR-GGFNKFGGPR-a7-b5	FUS	FUS	intra-protein link	515	269	0	42.97	0	FUS 75 mM KCl	3
FUS:269:x:FUS:515	GGFGPGKMDSR-GGFNKFGGPR-a7-b5	FUS	FUS	intra-protein link	515	269	0.68	42.92	0	FUS 500 mM KCl	3
FUS:311	HDSEQDNSDNNTIFVQGLGENVTIESVADYFKQIGIIK-K32-155	FUS	-	monolink	311		0	50.16	0	FUS 500 mM KCl	3
FUS:311	HDSEQDNSDNNTIFVQGLGENVTIESVADYFKQIGIIK-K32-155	FUS	-	monolink	311		0	48.96	0	FUS 75 mM KCl	3
FUS:317	QIGIIKTNKK-K6-155	FUS	-	monolink	317		0.46	37.43	0	FUS 500 mM KCl	3
FUS:317	QIGIIKTNKK-K6-155	FUS	-	monolink	317		0.52	36.75	0	FUS 75 mM KCl	3
FUS:317:x:FUS:320	QIGIIKTNKK-K6-K9	FUS	-	looplink	317	320	0.42	34.49	0	FUS 500 mM KCl	3
FUS:317:x:FUS:320	QIGIIKTNKK-K6-K9	FUS	-	looplink	317	320	0	33.82	0	FUS 75 mM KCl	3
FUS:317:x:FUS:321	KTGQPMINLYTDRETGK-QIGIIKTNK-a1-b6	FUS	FUS	intra-protein link	321	317	0	36.88	0	FUS 75 mM KCl	3
FUS:317:x:FUS:321	KTGQPMINLYTDR-QIGIIKTNK-a1-b6	FUS	FUS	intra-protein link	321	317	0	36.86	0	FUS 500 mM KCl	3
FUS:317:x:FUS:321	QIGIIKTNKK-K6-K10	FUS	-	looplink	317	321	0	27.13	0	FUS 500 mM KCl	2
FUS:317:x:FUS:362	AAIDWFDGKEFSGNPIK-QIGIIKTNK-a9-b6	FUS	FUS	intra-protein link	362	317	0.78	38.23	0	FUS 75 mM KCl	3
FUS:317:x:FUS:362	AAIDWFDGKEFSGNPIK-QIGIIKTNK-a9-b6	FUS	FUS	intra-protein link	362	317	0.38	31.82	0	FUS 500 mM KCl	3
FUS:317:x:FUS:432	AGDWKCPNPTCENMNFSWR-QIGIIKTNK-a5-b6	FUS	FUS	intra-protein link	432	317	0	30.88	0	FUS 75 mM KCl	3
FUS:317:x:FUS:453	NECNQCKAPKPDGPGGGPGGSHMGGNYGDDR-QIGIIKTNK-a7-b6	FUS	FUS	intra-protein link	453	317	0.47	27.58	0	FUS 75 mM KCl	2
FUS:317:x:FUS:515	GGFGPGKMDSR-QIGIIKTNK-a7-b6	FUS	FUS	intra-protein link	515	317	0.7	41.6	0	FUS 75 mM KCl	3
FUS:317:x:FUS:515	GGFGPGKMDSR-QIGIIKTNK-a7-b6	FUS	FUS	intra-protein link	515	317	0.7	41.03	0	FUS 500 mM KCl	3
FUS:320:x:FUS:321	TNKKTGQPMINLYTDR-K3-K4	FUS	-	looplink	320	321	0	42.42	0	FUS 75 mM KCl	3
FUS:320:x:FUS:321	TNKKTGQPMINLYTDR-K3-K4	FUS	-	looplink	320	321	0	39.58	0	FUS 500 mM KCl	3
FUS:321	KTGQPMINLYTDRETGK-K1-155	FUS	-	monolink	321		0.14	43.98	0	FUS 500 mM KCl	3
FUS:321	KTGQPMINLYTDR-K1-155	FUS	-	monolink	321		0	43.64	0	FUS 75 mM KCl	3
FUS:321:x:FUS:339	LKGEATVSFDDPPSAK-KTGQPMINLYTDR-a2-b1	FUS	FUS	intra-protein link	339	321	0.49	38.72	0	FUS 75 mM KCl	3
FUS:321:x:FUS:339	LKGEATVSFDDPPSAK-KTGQPMINLYTDR-a2-b1	FUS	FUS	intra-protein link	339	321	0.55	35.72	0	FUS 500 mM KCl	2
FUS:321:x:FUS:362	AAIDWFDGKEFSGNPIK-KTGQPMINLYTDR-a9-b1	FUS	FUS	intra-protein link	362	321	0.11	38.78	0	FUS 75 mM KCl	3
FUS:321:x:FUS:362	AAIDWFDGKEFSGNPIK-KTGQPMINLYTDR-a9-b1	FUS	FUS	intra-protein link	362	321	0.59	36.71	0	FUS 500 mM KCl	3
FUS:321:x:FUS:432	AGDWKCPNPTCENMNFSWR-KTGQPMINLYTDR-a5-b1	FUS	FUS	intra-protein link	432	321	0	39.38	0	FUS 75 mM KCl	3
FUS:321:x:FUS:453	NECNQCKAPKPDGPGGGPGGSHMGGNYGDDR-KTGQPMINLYTDR-a7-b1	FUS	FUS	intra-protein link	453	321	0	36.72	0	FUS 75 mM KCl	3
FUS:321:x:FUS:456	APKPDGPGGGPGGSHMGGNYGDDR-KTGQPMINLYTDR-a3-b1	FUS	FUS	intra-protein link	456	321	0	30.1	0	FUS 75 mM KCl	2
FUS:321:x:FUS:456	APKPDGPGGGPGGSHMGGNYGDDR-KTGQPMINLYTDR-a3-b1	FUS	FUS	intra-protein link	456	321	0	27.94	0	FUS 500 mM KCl	2
FUS:321:x:FUS:515	KTGQPMINLYTDR-GGFGPGKMDSR-a1-b7	FUS	FUS	intra-protein link	321	515	0.68	41.2	0	FUS 75 mM KCl	3
FUS:321:x:FUS:515	KTGQPMINLYTDR-GGFGPGKMDSR-a1-b7	FUS	FUS	intra-protein link	321	515	0.74	39.68	0	FUS 500 mM KCl	3
FUS:337	TGQPMINLYTDRETGKLK-K16-155	FUS	-	monolink	337		0	31.1	0	FUS 500 mM KCl	3
FUS:337	TGQPMINLYTDRETGKLK-K16-155	FUS	-	monolink	337		0	30.59	0	FUS 75 mM KCl	3
FUS:337:x:FUS:339	ETGKLKGEATVSFDDPPSAK-K4-K6	FUS	-	looplink	337	339	0	43.05	0	FUS 75 mM KCl	3
FUS:337:x:FUS:339	ETGKLKGEATVSFDDPPSAK-K4-K6	FUS	-	looplink	337	339	0	43.04	0	FUS 500 mM KCl	3
FUS:337:x:FUS:339	LKGEATVSFDDPPSAK-ETGKLK-a2-b4	FUS	FUS	intra-protein link	339	337	0.31	30.28	0	FUS 75 mM KCl	3
FUS:337:x:FUS:339	LKGEATVSFDDPPSAK-ETGKLK-a2-b4	FUS	FUS	intra-protein link	339	337	0.39	29.5	0	FUS 500 mM KCl	2
FUS:337:x:FUS:362	AAIDWFDGKEFSGNPIK-ETGKLK-a9-b4	FUS	FUS	intra-protein link	362	337	0.12	33.69	0	FUS 75 mM KCl	3
FUS:337:x:FUS:362	AAIDWFDGKEFSGNPIK-ETGKLK-a9-b4	FUS	FUS	intra-protein link	362	337	0.36	32	0	FUS 500 mM KCl	2
FUS:337:x:FUS:370	EFSGNPIKVSFATR-ETGKLK-a8-b4	FUS	FUS	intra-protein link	370	337	0.2	39.9	0	FUS 500 mM KCl	3
FUS:337:x:FUS:370	EFSGNPIKVSFATR-ETGKLK-a8-b4	FUS	FUS	intra-protein link	370	337	0.25	35.47	0	FUS 75 mM KCl	3
FUS:337:x:FUS:432	AGDWKCPNPTCENMNFSWR-ETGKLK-a5-b4	FUS	FUS	intra-protein link	432	337	0.13	35.79	0	FUS 75 mM KCl	2
FUS:337:x:FUS:453	NECNQCKAPKPDGPGGGPGGSHMGGNYGDDR-ETGKLK-a7-b4	FUS	FUS	intra-protein link	453	337	0.42	30.62	0	FUS 75 mM KCl	3
FUS:337:x:FUS:453	NECNQCKAPKPDGPGGGPGGSHMGGNYGDDR-ETGKLK-a7-b4	FUS	FUS	intra-protein link	453	337	0.41	25.23	0	FUS 500 mM KCl	2
FUS:337:x:FUS:515	GGFGPGKMDSR-ETGKLK-a7-b4	FUS	FUS	intra-protein link	515	337	0.74	31.89	0	FUS 75 mM KCl	3
FUS:337:x:FUS:515	GGFGPGKMDSR-ETGKLK-a7-b4	FUS	FUS	intra-protein link	515	337	0.76	26.46	0	FUS 500 mM KCl	2
FUS:339	LKGEATVSFDDPPSAK-K2-155	FUS	-	monolink	339		0.09	46.55	0	FUS 75 mM KCl	3
FUS:339	LKGEATVSFDDPPSAK-K2-155	FUS	-	monolink	339		0.15	45.17	0	FUS 500 mM KCl	3
FUS:339:x:FUS:362	AAIDWFDGKEFSGNPIK-LKGEATVSFDDPPSAK-a9-b2	FUS	FUS	intra-protein link	362	339	0.5	45.11	0	FUS 75 mM KCl	3
FUS:339:x:FUS:362	AAIDWFDGKEFSGNPIK-LKGEATVSFDDPPSAK-a9-b2	FUS	FUS	intra-protein link	362	339	0.56	42.97	0	FUS 500 mM KCl	3
FUS:339:x:FUS:370	LKGEATVSFDDPPSAK-EFSGNPIKVSFATR-a2-b8	FUS	FUS	intra-protein link	339	370	0.45	43.48	0	FUS 75 mM KCl	3
FUS:339:x:FUS:370	LKGEATVSFDDPPSAK-EFSGNPIKVSFATR-a2-b8	FUS	FUS	intra-protein link	339	370	0.55	42.45	0	FUS 500 mM KCl	3
FUS:339:x:FUS:432	AGDWKCPNPTCENMNFSWR-LKGEATVSFDDPPSAK-a5-b2	FUS	FUS	intra-protein link	432	339	0.45	43.08	0	FUS 75 mM KCl	3
FUS:339:x:FUS:432	AGDWKCPNPTCENMNFSWR-LKGEATVSFDDPPSAK-a5-b2	FUS	FUS	intra-protein link	432	339	0.47	38.16	0	FUS 500 mM KCl	2
FUS:339:x:FUS:453	NECNQCKAPKPDGPGGGPGGSHMGGNYGDDR-LKGEATVSFDDPPSAK-a7-b2	FUS	FUS	intra-protein link	453	339	0.75	40.52	0	FUS 75 mM KCl	3
FUS:339:x:FUS:453	NECNQCKAPKPDGPGGGPGGSHMGGNYGDDR-LKGEATVSFDDPPSAK-a7-b2	FUS	FUS	intra-protein link	453	339	0.69	39.96	0	FUS 500 mM KCl	3
FUS:339:x:FUS:456	APKPDGPGGGPGGSHMGGNYGDDR-LKGEATVSFDDPPSAK-a3-b2	FUS	FUS	intra-protein link	456	339	0.42	42.64	0	FUS 75 mM KCl	3
FUS:339:x:FUS:456	NECNQCKAPKPDGPGGGPGGSHMGGNYGDDR-LKGEATVSFDDPPSAK-a10-b2	FUS	FUS	intra-protein link	456	339	0.37	31.13	0	FUS 500 mM KCl	3
FUS:339:x:FUS:515	LKGEATVSFDDPPSAK-GGFGPGKMDSR-a2-b7	FUS	FUS	intra-protein link	339	515	0.45	40.63	0	FUS 500 mM KCl	3
FUS:339:x:FUS:515	LKGEATVSFDDPPSAK-GGFGPGKMDSR-a2-b7	FUS	FUS	intra-protein link	339	515	0.43	39.73	0	FUS 75 mM KCl	3
FUS:353	GEATVSFDDPPSAKAAIDWFDGK-K14-156	FUS	-	monolink	353		0.15	48.74	0	FUS 500 mM KCl	3
FUS:353	GEATVSFDDPPSAKAAIDWFDGK-K14-156	FUS	-	monolink	353		0.24	45.63	0	FUS 75 mM KCl	3
FUS:353:x:FUS:362	GEATVSFDDPPSAKAAIDWFDGKEFSGNPIK-K14-K23	FUS	-	looplink	353	362	0	37.37	0	FUS 500 mM KCl	2
FUS:353:x:FUS:362	GEATVSFDDPPSAKAAIDWFDGKEFSGNPIK-K14-K23	FUS	-	looplink	353	362	0	35.13	0	FUS 75 mM KCl	3
FUS:362	AAIDWFDGKEFSGNPIK-K9-155	FUS	-	monolink	362		0.1	55.01	0	FUS 500 mM KCl	3
FUS:362	AAIDWFDGKEFSGNPIK-K9-155	FUS	-	monolink	362		0.2	54.56	0	FUS 75 mM KCl	3
FUS:362:x:FUS:362	AAIDWFDGKEFSGNPIK-AAIDWFDGKEFSGNPIK-a9-b9	FUS	FUS	intra-protein link	362	362	0	47.44	0	FUS 500 mM KCl	3
FUS:362:x:FUS:362	AAIDWFDGKEFSGNPIK-AAIDWFDGKEFSGNPIK-a9-b9	FUS	FUS	intra-protein link	362	362	0	47.24	0	FUS 75 mM KCl	3
FUS:362:x:FUS:370	AAIDWFDGKEFSGNPIKVSFATR-K9-K17	FUS	-	looplink	362	370	0	39.13	0	FUS 500 mM KCl	3
FUS:362:x:FUS:370	AAIDWFDGKEFSGNPIKVSFATR-K9-K17	FUS	-	looplink	362	370	0	37.82	0	FUS 75 mM KCl	3
FUS:362:x:FUS:370	AAIDWFDGKEFSGNPIK-EFSGNPIKVSFATR-a9-b8	FUS	FUS	intra-protein link	362	370	0	31.37	0	FUS 500 mM KCl	3
FUS:362:x:FUS:370	AAIDWFDGKEFSGNPIK-EFSGNPIKVSFATR-a9-b8	FUS	FUS	intra-protein link	362	370	0.6	28.1	0	FUS 75 mM KCl	3
FUS:362:x:FUS:432	AGDWKCPNPTCENMNFSWR-AAIDWFDGKEFSGNPIK-a5-b9	FUS	FUS	intra-protein link	432	362	0	52.45	0	FUS 500 mM KCl	3
FUS:362:x:FUS:432	AGDWKCPNPTCENMNFSWR-AAIDWFDGKEFSGNPIK-a5-b9	FUS	FUS	intra-protein link	432	362	0	51.49	0	FUS 75 mM KCl	3
FUS:362:x:FUS:453	NECNQCKAPKPDGPGGGPGGSHMGGNYGDDR-AAIDWFDGKEFSGNPIK-a7-b9	FUS	FUS	intra-protein link	453	362	0.66	41.12	0	FUS 500 mM KCl	2
FUS:362:x:FUS:453	NECNQCKAPKPDGPGGGPGGSHMGGNYGDDR-AAIDWFDGKEFSGNPIK-a7-b9	FUS	FUS	intra-protein link	453	362	0.75	39.4	0	FUS 75 mM KCl	3
FUS:362:x:FUS:456	NECNQCKAPKPDGPGGGPGGSHMGGNYGDDR-AAIDWFDGKEFSGNPIK-a10-b9	FUS	FUS	intra-protein link	456	362	0.64	35.22	0	FUS 75 mM KCl	3
FUS:362:x:FUS:456	NECNQCKAPKPDGPGGGPGGSHMGGNYGDDR-AAIDWFDGKEFSGNPIK-a10-b9	FUS	FUS	intra-protein link	456	362	0.77	34.95	0	FUS 500 mM KCl	2
FUS:362:x:FUS:515	AAIDWFDGKEFSGNPIK-GGFGPGKMDSR-a9-b7	FUS	FUS	intra-protein link	362	515	0.43	55.19	0	FUS 500 mM KCl	3
FUS:362:x:FUS:515	AAIDWFDGKEFSGNPIK-GGFGPGKMDSR-a9-b7	FUS	FUS	intra-protein link	362	515	0	54.5	0	FUS 75 mM KCl	3
FUS:370	EFSGNPIKVSFATR-K8-156	FUS	-	monolink	370		0	53.87	0	FUS 75 mM KCl	3
FUS:370	EFSGNPIKVSFATR-K8-156	FUS	-	monolink	370		0	52.67	0	FUS 500 mM KCl	3
FUS:370:x:FUS:370	EFSGNPIKVSFATR-EFSGNPIKVSFATR-a8-b8	FUS	FUS	intra-protein link	370	370	0	31.92	0	FUS 75 mM KCl	3
FUS:370:x:FUS:432	AGDWKCPNPTCENMNFSWR-EFSGNPIKVSFATR-a5-b8	FUS	FUS	intra-protein link	432	370	0	39.22	0	FUS 75 mM KCl	3
FUS:370:x:FUS:432	AGDWKCPNPTCENMNFSWR-EFSGNPIKVSFATR-a5-b8	FUS	FUS	intra-protein link	432	370	0	38.24	0	FUS 500 mM KCl	3
FUS:370:x:FUS:453	NECNQCKAPKPDGPGGGPGGSHMGGNYGDDR-EFSGNPIKVSFATR-a7-b8	FUS	FUS	intra-protein link	453	370	0.63	38.25	0	FUS 75 mM KCl	3
FUS:370:x:FUS:453	NECNQCKAPKPDGPGGGPGGSHMGGNYGDDR-EFSGNPIKVSFATR-a7-b8	FUS	FUS	intra-protein link	453	370	0.59	32.84	0	FUS 500 mM KCl	3
FUS:370:x:FUS:456	APKPDGPGGGPGGSHMGGNYGDDR-EFSGNPIKVSFATR-a3-b8	FUS	FUS	intra-protein link	456	370	0	31.17	0	FUS 500 mM KCl	3
FUS:370:x:FUS:456	APKPDGPGGGPGGSHMGGNYGDDR-EFSGNPIKVSFATR-a3-b8	FUS	FUS	intra-protein link	456	370	0	30.43	0	FUS 75 mM KCl	3
FUS:370:x:FUS:515	EFSGNPIKVSFATR-GGFGPGKMDSR-a8-b7	FUS	FUS	intra-protein link	370	515	0	36.75	0	FUS 500 mM KCl	3
FUS:370:x:FUS:515	EFSGNPIKVSFATR-GGFGPGKMDSR-a8-b7	FUS	FUS	intra-protein link	370	515	0	35.85	0	FUS 75 mM KCl	3
FUS:432	AGDWKCPNPTCENMNFSWR-K5-156	FUS	-	monolink	432		0.04	51.15	0	FUS 75 mM KCl	3
FUS:432	AGDWKCPNPTCENMNFSWR-K5-156	FUS	-	monolink	432		0.02	50.7	0	FUS 500 mM KCl	3
FUS:432:x:FUS:432	AGDWKCPNPTCENMNFSWR-AGDWKCPNPTCENMNFSWR-a5-b5	FUS	FUS	intra-protein link	432	432	0	40.27	0	FUS 75 mM KCl	3
FUS:432:x:FUS:432	AGDWKCPNPTCENMNFSWR-AGDWKCPNPTCENMNFSWR-a5-b5	FUS	FUS	intra-protein link	432	432	0	37.77	0	FUS 500 mM KCl	2
FUS:432:x:FUS:453	NECNQCKAPKPDGPGGGPGGSHMGGNYGDDR-AGDWKCPNPTCENMNFSWR-a7-b5	FUS	FUS	intra-protein link	453	432	0.41	43.7	0	FUS 75 mM KCl	3
FUS:432:x:FUS:453	NECNQCKAPKPDGPGGGPGGSHMGGNYGDDR-AGDWKCPNPTCENMNFSWR-a7-b5	FUS	FUS	intra-protein link	453	432	0.6	42.51	0	FUS 500 mM KCl	2
FUS:432:x:FUS:456	APKPDGPGGGPGGSHMGGNYGDDR-AGDWKCPNPTCENMNFSWR-a3-b5	FUS	FUS	intra-protein link	456	432	0	42.94	0	FUS 500 mM KCl	3
FUS:432:x:FUS:456	APKPDGPGGGPGGSHMGGNYGDDR-AGDWKCPNPTCENMNFSWR-a3-b5	FUS	FUS	intra-protein link	456	432	0	37.55	0	FUS 75 mM KCl	3
FUS:432:x:FUS:515	AGDWKCPNPTCENMNFSWR-GGFGPGKMDSR-a5-b7	FUS	FUS	intra-protein link	432	515	0	54.27	0	FUS 75 mM KCl	3
FUS:432:x:FUS:515	AGDWKCPNPTCENMNFSWR-GGFGPGKMDSR-a5-b7	FUS	FUS	intra-protein link	432	515	0	48.92	0	FUS 500 mM KCl	3
FUS:453	NECNQCKAPKPDGPGGGPGGSHMGGNYGDDR-K7-155	FUS	-	monolink	453		0.06	43.51	0	FUS 500 mM KCl	3
FUS:453	NECNQCKAPKPDGPGGGPGGSHMGGNYGDDR-K7-155	FUS	-	monolink	453		0.12	41.13	0	FUS 75 mM KCl	3
FUS:453:x:FUS:456	NECNQCKAPKPDGPGGGPGGSHMGGNYGDDR-K7-K10	FUS	-	looplink	453	456	0.02	38.12	0	FUS 75 mM KCl	3
FUS:453:x:FUS:456	NECNQCKAPKPDGPGGGPGGSHMGGNYGDDR-K7-K10	FUS	-	looplink	453	456	0.06	37.27	0	FUS 500 mM KCl	3
FUS:453:x:FUS:515	NECNQCKAPKPDGPGGGPGGSHMGGNYGDDR-GGFGPGKMDSR-a7-b7	FUS	FUS	intra-protein link	453	515	0.7	45.22	0	FUS 75 mM KCl	3
FUS:453:x:FUS:515	NECNQCKAPKPDGPGGGPGGSHMGGNYGDDR-GGFGPGKMDSR-a7-b7	FUS	FUS	intra-protein link	453	515	0.71	41.61	0	FUS 500 mM KCl	3
FUS:456	APKPDGPGGGPGGSHMGGNYGDDRR-K3-156	FUS	-	monolink	456		0	48.52	0	FUS 75 mM KCl	3
FUS:456	APKPDGPGGGPGGSHMGGNYGDDRR-K3-156	FUS	-	monolink	456		0	47.25	0	FUS 500 mM KCl	3
FUS:456:x:FUS:515	APKPDGPGGGPGGSHMGGNYGDDR-GGFGPGKMDSR-a3-b7	FUS	FUS	intra-protein link	456	515	0	38.78	0	FUS 75 mM KCl	3
FUS:456:x:FUS:515	APKPDGPGGGPGGSHMGGNYGDDR-GGFGPGKMDSR-a3-b7	FUS	FUS	intra-protein link	456	515	0.53	37.79	0	FUS 500 mM KCl	3
FUS:515	GGFGPGKMDSR-K7-156	FUS	-	monolink	515		0	44.99	0	FUS 500 mM KCl	2
FUS:515:x:FUS:515	GGFGPGKMDSR-GGFGPGKMDSR-a7-b7	FUS	FUS	intra-protein link	515	515	0.79	39.99	0	FUS 75 mM KCl	3
FUS:515:x:FUS:515	GGFGPGKMDSR-GGFGPGKMDSR-a7-b7	FUS	FUS	intra-protein link	515	515	0	37.88	0	FUS 500 mM KCl	3

## Sheet: Table S4
Supplemental Table 4. FUS Salt 2 Experiment Crosslink Quantification. Related to Figure 1A, 1B
Quantifiaction for each unique crosslinking site shown in Table S3
uxID	experiment	link_type	ms1_area_sum	imputed	ms1_area_sum_ref	imputed_ref	log2ratio	reference experiment	pvalue	FDR
FUS:269	75 mM KCl	monolink	28.5849	0	28.8161	0	-0.231205	500 mM KCl	0.273532	0.310002
FUS:269:x:FUS:317	75 mM KCl	xlink	26.2689	0	25.8806	0	0.388266	500 mM KCl	0.119361	0.159147
FUS:269:x:FUS:321	75 mM KCl	xlink	27.2399	0	26.9212	0	0.318755	500 mM KCl	0.00461457	0.00950881
FUS:269:x:FUS:339	75 mM KCl	xlink	29.9621	0	29.7777	0	0.184389	500 mM KCl	0.137327	0.179582
FUS:269:x:FUS:362	75 mM KCl	xlink	30.1752	0	29.4298	0	0.745359	500 mM KCl	1.52868e-05	0.0001485
FUS:269:x:FUS:370	75 mM KCl	xlink	29.4514	0	29.0864	0	0.365018	500 mM KCl	0.00311272	0.00729879
FUS:269:x:FUS:432	75 mM KCl	xlink	27.7117	0	27.9565	0	-0.244833	500 mM KCl	0.196002	0.233827
FUS:269:x:FUS:453	75 mM KCl	xlink	26.9399	0	26.6944	0	0.24546	500 mM KCl	0.106771	0.145208
FUS:269:x:FUS:515	75 mM KCl	xlink	28.3672	0	28.0944	0	0.272728	500 mM KCl	0.467561	0.496783
FUS:311	75 mM KCl	monolink	26.5997	0	29.8414	0	-3.24164	500 mM KCl	0.00390205	0.0087045
FUS:317	75 mM KCl	monolink	30.088	0	29.573	0	0.515076	500 mM KCl	0.00814541	0.0153858
FUS:317:x:FUS:320	75 mM KCl	looplink	24.8036	0	24.0963	0	0.707251	500 mM KCl	0.189853	0.230535
FUS:317:x:FUS:321	75 mM KCl	looplink	24.7591	0	24.738	1	0.021074	500 mM KCl	0.939213	0.939213
FUS:317:x:FUS:321	75 mM KCl	xlink	35.0048	0	34.1902	0	0.814612	500 mM KCl	2.91536e-05	0.000180222
FUS:317:x:FUS:362	75 mM KCl	xlink	29.0728	0	27.3998	0	1.673	500 mM KCl	9.35245e-06	0.000105994
FUS:317:x:FUS:432	75 mM KCl	xlink	27.6219	0	26.3326	0	1.28932	500 mM KCl	3.93427e-05	0.000222942
FUS:317:x:FUS:453	75 mM KCl	xlink	26.997	0	25.4876	0	1.50943	500 mM KCl	0.00264222	0.00665448
FUS:317:x:FUS:515	75 mM KCl	xlink	27.5439	0	25.7359	0	1.80798	500 mM KCl	0.000246245	0.00104654
FUS:320:x:FUS:321	75 mM KCl	looplink	29.3359	0	29.357	0	-0.0210584	500 mM KCl	0.749514	0.76897
FUS:321	75 mM KCl	monolink	31.6752	1	32.8561	0	-1.18094	500 mM KCl	0.00132193	0.00374547
FUS:321:x:FUS:339	75 mM KCl	xlink	27.8166	0	26.9042	0	0.912366	500 mM KCl	0.000280043	0.00105794
FUS:321:x:FUS:362	75 mM KCl	xlink	29.4489	0	27.1671	0	2.28185	500 mM KCl	8.65502e-06	0.000105994
FUS:321:x:FUS:432	75 mM KCl	xlink	27.91	0	27.1325	0	0.77747	500 mM KCl	0.00889569	0.0163488
FUS:321:x:FUS:453	75 mM KCl	xlink	28.0597	0	26.7027	0	1.35706	500 mM KCl	2.68038e-05	0.000180222
FUS:321:x:FUS:456	75 mM KCl	xlink	25.1432	0	23.9557	0.125	1.18749	500 mM KCl	0.000393907	0.00127551
FUS:321:x:FUS:515	75 mM KCl	xlink	27.6371	0	26.854	0	0.783146	500 mM KCl	0.0054276	0.0106387
FUS:337	75 mM KCl	monolink	31.226	0	31.42	0	-0.193953	500 mM KCl	0.208227	0.244129
FUS:337:x:FUS:339	75 mM KCl	looplink	31.3966	0	32.0156	0	-0.618975	500 mM KCl	0.432423	0.466742
FUS:337:x:FUS:339	75 mM KCl	xlink	27.6566	0	25.6281	0	2.02852	500 mM KCl	5.96604e-08	4.05691e-06
FUS:337:x:FUS:362	75 mM KCl	xlink	28.4069	0	27.4314	0	0.975492	500 mM KCl	0.000139232	0.000631186
FUS:337:x:FUS:370	75 mM KCl	xlink	30.9749	0	30.4257	0	0.549263	500 mM KCl	0.00234506	0.00613325
FUS:337:x:FUS:453	75 mM KCl	xlink	26.6679	0	24.6547	0	2.01316	500 mM KCl	0.00149623	0.00406974
FUS:337:x:FUS:515	75 mM KCl	xlink	27.3394	0	25.6466	0	1.69278	500 mM KCl	0.002829	0.00687043
FUS:339	75 mM KCl	monolink	32.2567	0	32.5728	0	-0.316093	500 mM KCl	0.328403	0.366088
FUS:339:x:FUS:362	75 mM KCl	xlink	30.883	0	29.2496	0	1.63342	500 mM KCl	4.32191e-06	9.79632e-05
FUS:339:x:FUS:370	75 mM KCl	xlink	31.4345	0	31.2849	0	0.149619	500 mM KCl	0.0853201	0.123442
FUS:339:x:FUS:432	75 mM KCl	xlink	28.5554	0	27.7965	0	0.758873	500 mM KCl	0.00547579	0.0106387
FUS:339:x:FUS:453	75 mM KCl	xlink	30.0991	0	29.1586	0	0.940466	500 mM KCl	0.000445123	0.00137583
FUS:339:x:FUS:456	75 mM KCl	xlink	29.2487	0	28.3675	0	0.881238	500 mM KCl	0.000274727	0.00105794
FUS:339:x:FUS:515	75 mM KCl	xlink	30.0261	0	29.0799	0	0.94621	500 mM KCl	1.89676e-05	0.0001604
FUS:353	75 mM KCl	monolink	31.5073	0	31.9383	0	-0.430969	500 mM KCl	0.00923926	0.0165334
FUS:353:x:FUS:362	75 mM KCl	looplink	26.654	0	27.7031	0	-1.04904	500 mM KCl	0.0179044	0.0304375
FUS:362	75 mM KCl	monolink	30.6445	0	31.5374	0	-0.892926	500 mM KCl	0.150678	0.193323
FUS:362:x:FUS:362	75 mM KCl	xlink	28.4225	0	26.9594	0	1.46312	500 mM KCl	6.42864e-05	0.000312248
FUS:362:x:FUS:370	75 mM KCl	looplink	27.0228	0	29.5948	0	-2.57196	500 mM KCl	4.66205e-05	0.000243861
FUS:362:x:FUS:370	75 mM KCl	xlink	28.9798	0	27.3963	0	1.58352	500 mM KCl	8.34768e-06	0.000105994
FUS:362:x:FUS:432	75 mM KCl	xlink	29.1141	0	28.5237	0	0.590371	500 mM KCl	0.00435499	0.00925434
FUS:362:x:FUS:453	75 mM KCl	xlink	30.0877	0	29.167	0	0.92066	500 mM KCl	0.00037731	0.00127551
FUS:362:x:FUS:456	75 mM KCl	xlink	30.3326	0	29.336	0	0.996581	500 mM KCl	0.000358333	0.00127551
FUS:362:x:FUS:515	75 mM KCl	xlink	31.5232	0	30.4985	0	1.02476	500 mM KCl	2.12294e-05	0.0001604
FUS:370	75 mM KCl	monolink	32.0145	0	32.1677	0	-0.1532	500 mM KCl	0.0575154	0.0850227
FUS:370:x:FUS:370	75 mM KCl	xlink	25.4481	0	24.823	1	0.625093	500 mM KCl	0.0460747	0.0712063
FUS:370:x:FUS:432	75 mM KCl	xlink	28.5725	0	28.4223	0	0.150207	500 mM KCl	0.266267	0.306884
FUS:370:x:FUS:453	75 mM KCl	xlink	28.924	0	28.4643	0	0.459714	500 mM KCl	0.0488957	0.0738869
FUS:370:x:FUS:456	75 mM KCl	xlink	27.5551	0	27.282	0	0.273018	500 mM KCl	0.0929334	0.128969
FUS:370:x:FUS:515	75 mM KCl	xlink	29.7863	0	28.921	0	0.865265	500 mM KCl	3.71577e-06	9.79632e-05
FUS:432	75 mM KCl	monolink	32.5285	0	33.1885	0	-0.659997	500 mM KCl	0.0295871	0.0479029
FUS:432:x:FUS:432	75 mM KCl	xlink	26.9717	0	27.3791	0	-0.4074	500 mM KCl	0.15592	0.196344
FUS:432:x:FUS:453	75 mM KCl	xlink	29.1832	0	29.9466	0	-0.763418	500 mM KCl	0.00396823	0.0087045
FUS:432:x:FUS:456	75 mM KCl	xlink	29.7594	0	30.7968	0	-1.03734	500 mM KCl	0.00121483	0.00359166
FUS:432:x:FUS:515	75 mM KCl	xlink	31.0594	0	31.1789	0	-0.119513	500 mM KCl	0.371814	0.407797
FUS:453	75 mM KCl	monolink	36.0536	0	35.9816	0	0.0720227	500 mM KCl	0.676927	0.70817
FUS:453:x:FUS:456	75 mM KCl	looplink	33.3903	0	34.0298	0	-0.639515	500 mM KCl	0.0238744	0.0395965
FUS:453:x:FUS:515	75 mM KCl	xlink	31.0821	0	30.7884	0	0.293707	500 mM KCl	0.0129023	0.0224964
FUS:456	75 mM KCl	monolink	36.358	0	36.3145	0	0.0434547	500 mM KCl	0.757662	0.76897
FUS:456:x:FUS:515	75 mM KCl	xlink	30.7415	0	30.5128	0	0.228749	500 mM KCl	0.0890002	0.126084
FUS:515	75 mM KCl	monolink	24.447	1	21.9353	0.5	2.51172	500 mM KCl	0.182036	0.225063
FUS:515:x:FUS:515	75 mM KCl	xlink	29.5221	0	28.9807	0	0.541368	500 mM KCl	0.0457111	0.0712063

## Sheet: Table S5
Supplemental Table 5. FUS Salt 3 Experiment Crosslink Identification. Related to Figure 1A, 1B
Crosslinks were only considered, if they were identified in two out of three replicates with a deltaS < 0.95, a minimum Id score ≥ 20 and an ld score ≥ 25 in at least one replicate (filtering was done on the level of the unique crosslinking site) and an FDR < 0.05 as calculated by xProphet for at least one replicate.
Only the highest scoring crosslink from three replicates is shown.
uxID	Id	Protein1	Protein2	XLType	AbsPos1	AbsPos2	deltaS	ld-Score	FDR	No of Ids in triplicates	Salt Concentration
FUS:269:x:FUS:317	GGFNKFGGPR-QIGIIKTNK-a5-b6	FUS	FUS	intra-protein link	269	317	0	36.18	0	3	75 mM KCl
FUS:269:x:FUS:317	GGFNKFGGPR-QIGIIKTNK-a5-b6	FUS	FUS	intra-protein link	269	317	0	32.41	0.019	3	500 mM KCl
FUS:269:x:FUS:321	KTGQPMINLYTDR-GGFNKFGGPR-a1-b5	FUS	FUS	intra-protein link	321	269	0	39.68	0	3	75 mM KCl
FUS:269:x:FUS:321	KTGQPMINLYTDR-GGFNKFGGPR-a1-b5	FUS	FUS	intra-protein link	321	269	0	37.12	0	3	500 mM KCl
FUS:269:x:FUS:339	LKGEATVSFDDPPSAK-GGFNKFGGPR-a2-b5	FUS	FUS	intra-protein link	339	269	0.28	39.89	0	3	500 mM KCl
FUS:269:x:FUS:339	LKGEATVSFDDPPSAK-GGFNKFGGPR-a2-b5	FUS	FUS	intra-protein link	339	269	0	39.31	0	3	75 mM KCl
FUS:269:x:FUS:362	AAIDWFDGKEFSGNPIK-GGFNKFGGPR-a9-b5	FUS	FUS	intra-protein link	362	269	0.37	37.52	0	3	75 mM KCl
FUS:269:x:FUS:362	AAIDWFDGKEFSGNPIK-GGFNKFGGPR-a9-b5	FUS	FUS	intra-protein link	362	269	0	36.16	0	3	500 mM KCl
FUS:269:x:FUS:370	AAIDWFDGKEFSGNPIKVSFATR-GGFNKFGGPR-a17-b5	FUS	FUS	intra-protein link	370	269	0	35.82	0	3	500 mM KCl
FUS:269:x:FUS:370	AAIDWFDGKEFSGNPIKVSFATR-GGFNKFGGPR-a17-b5	FUS	FUS	intra-protein link	370	269	0	30.84	0.048	3	75 mM KCl
FUS:269:x:FUS:515	GGFGPGKMDSR-GGFNKFGGPR-a7-b5	FUS	FUS	intra-protein link	515	269	0.7	42.45	0	3	75 mM KCl
FUS:269:x:FUS:515	GGFGPGKMDSR-GGFNKFGGPR-a7-b5	FUS	FUS	intra-protein link	515	269	0.67	39.35	0	3	500 mM KCl
FUS:311	HDSEQDNSDNNTIFVQGLGENVTIESVADYFKQIGIIK-K32-155	FUS	-	monolink	311		0	50.12	0	3	500 mM KCl
FUS:311	HDSEQDNSDNNTIFVQGLGENVTIESVADYFKQIGIIK-K32-155	FUS	-	monolink	311		0	47.44	0	3	75 mM KCl
FUS:317:x:FUS:321	KTGQPMINLYTDRETGK-QIGIIKTNK-a1-b6	FUS	FUS	intra-protein link	321	317	0	36.87	0	3	500 mM KCl
FUS:317:x:FUS:321	KTGQPMINLYTDR-QIGIIKTNK-a1-b6	FUS	FUS	intra-protein link	321	317	0	34.01	0.033	3	75 mM KCl
FUS:317:x:FUS:339	LKGEATVSFDDPPSAK-QIGIIKTNKK-a2-b6	FUS	FUS	intra-protein link	339	317	0.93	30.9	0.033	3	75 mM KCl
FUS:317:x:FUS:362	AAIDWFDGKEFSGNPIK-QIGIIKTNKK-a9-b6	FUS	FUS	intra-protein link	362	317	0.43	35.16	0	3	75 mM KCl
FUS:317:x:FUS:362	AAIDWFDGKEFSGNPIK-QIGIIKTNK-a9-b6	FUS	FUS	intra-protein link	362	317	0	33.56	0.019	3	500 mM KCl
FUS:317:x:FUS:515	GGFGPGKMDSR-QIGIIKTNKK-a7-b6	FUS	FUS	intra-protein link	515	317	0.68	33.16	0	2	75 mM KCl
FUS:317:x:FUS:515	GGFGPGKMDSR-QIGIIKTNK-a7-b6	FUS	FUS	intra-protein link	515	317	0.61	28.36	0.019	2	500 mM KCl
FUS:320:x:FUS:321	TNKKTGQPMINLYTDR-K3-K4	FUS	-	looplink	320	321	0	37.76	0	3	500 mM KCl
FUS:320:x:FUS:321	TNKKTGQPMINLYTDR-K3-K4	FUS	-	looplink	320	321	0	34.22	0	3	75 mM KCl
FUS:320:x:FUS:515	GGFGPGKMDSR-QIGIIKTNKK-a7-b9	FUS	FUS	intra-protein link	515	320	0.77	31.27	0.033	2	75 mM KCl
FUS:321	KTGQPMINLYTDR-K1-155	FUS	-	monolink	321		0	40.84	0	3	500 mM KCl
FUS:321	KTGQPMINLYTDR-K1-155	FUS	-	monolink	321		0	39.7	0	3	75 mM KCl
FUS:321:x:FUS:339	LKGEATVSFDDPPSAK-KTGQPMINLYTDR-a2-b1	FUS	FUS	intra-protein link	339	321	0.61	38.95	0	3	500 mM KCl
FUS:321:x:FUS:339	LKGEATVSFDDPPSAK-KTGQPMINLYTDR-a2-b1	FUS	FUS	intra-protein link	339	321	0	36.48	0	3	75 mM KCl
FUS:321:x:FUS:362	AAIDWFDGKEFSGNPIK-KTGQPMINLYTDR-a9-b1	FUS	FUS	intra-protein link	362	321	0	37.01	0	3	75 mM KCl
FUS:321:x:FUS:362	AAIDWFDGKEFSGNPIK-KTGQPMINLYTDR-a9-b1	FUS	FUS	intra-protein link	362	321	0.67	36.35	0	3	500 mM KCl
FUS:321:x:FUS:370	EFSGNPIKVSFATR-KTGQPMINLYTDR-a8-b1	FUS	FUS	intra-protein link	370	321	0	30.52	0.048	3	75 mM KCl
FUS:321:x:FUS:432	AGDWKCPNPTCENMNFSWR-KTGQPMINLYTDR-a5-b1	FUS	FUS	intra-protein link	432	321	0	35.65	0.019	3	500 mM KCl
FUS:321:x:FUS:432	AGDWKCPNPTCENMNFSWR-KTGQPMINLYTDR-a5-b1	FUS	FUS	intra-protein link	432	321	0	29.35	0	2	75 mM KCl
FUS:321:x:FUS:456	APKPDGPGGGPGGSHMGGNYGDDR-KTGQPMINLYTDR-a3-b1	FUS	FUS	intra-protein link	456	321	0	29.96	0.019	3	500 mM KCl
FUS:321:x:FUS:456	APKPDGPGGGPGGSHMGGNYGDDR-KTGQPMINLYTDR-a3-b1	FUS	FUS	intra-protein link	456	321	0	27.41	0	2	75 mM KCl
FUS:321:x:FUS:515	KTGQPMINLYTDR-GGFGPGKMDSR-a1-b7	FUS	FUS	intra-protein link	321	515	0	30.95	0.019	2	500 mM KCl
FUS:321:x:FUS:515	KTGQPMINLYTDR-GGFGPGKMDSR-a1-b7	FUS	FUS	intra-protein link	321	515	0	28.92	0.048	3	75 mM KCl
FUS:337	ETGKLKGEATVSFDDPPSAK-K4-155	FUS	-	monolink	337		0	40.28	0	3	500 mM KCl
FUS:337	ETGKLKGEATVSFDDPPSAK-K4-155	FUS	-	monolink	337		0	35.78	0	3	75 mM KCl
FUS:337:x:FUS:339	ETGKLKGEATVSFDDPPSAK-K4-K6	FUS	-	looplink	337	339	0	41	0	3	500 mM KCl
FUS:337:x:FUS:339	ETGKLKGEATVSFDDPPSAK-K4-K6	FUS	-	looplink	337	339	0	39.9	0	3	75 mM KCl
FUS:337:x:FUS:370	EFSGNPIKVSFATR-ETGKLK-a8-b4	FUS	FUS	intra-protein link	370	337	0	33.05	0.033	3	75 mM KCl
FUS:337:x:FUS:370	ETGKLKGEATVSFDDPPSAK-EFSGNPIKVSFATR-a4-b8	FUS	FUS	intra-protein link	337	370	0.2	32.13	0.019	3	500 mM KCl
FUS:337:x:FUS:515	GGFGPGKMDSR-ETGKLK-a7-b4	FUS	FUS	intra-protein link	515	337	0.51	32.37	0	2	75 mM KCl
FUS:339	LKGEATVSFDDPPSAK-K2-156	FUS	-	monolink	339		0.14	43.74	0	3	500 mM KCl
FUS:339	LKGEATVSFDDPPSAK-K2-155	FUS	-	monolink	339		0	42.64	0	3	75 mM KCl
FUS:339:x:FUS:362	AAIDWFDGKEFSGNPIK-LKGEATVSFDDPPSAK-a9-b2	FUS	FUS	intra-protein link	362	339	0.55	47.53	0	3	75 mM KCl
FUS:339:x:FUS:362	AAIDWFDGKEFSGNPIK-LKGEATVSFDDPPSAK-a9-b2	FUS	FUS	intra-protein link	362	339	0	42.76	0	3	500 mM KCl
FUS:339:x:FUS:370	LKGEATVSFDDPPSAK-EFSGNPIKVSFATR-a2-b8	FUS	FUS	intra-protein link	339	370	0.49	42.53	0	3	500 mM KCl
FUS:339:x:FUS:370	LKGEATVSFDDPPSAK-EFSGNPIKVSFATR-a2-b8	FUS	FUS	intra-protein link	339	370	0	36.07	0	3	75 mM KCl
FUS:339:x:FUS:432	AGDWKCPNPTCENMNFSWR-LKGEATVSFDDPPSAK-a5-b2	FUS	FUS	intra-protein link	432	339	0	32.76	0.019	3	500 mM KCl
FUS:339:x:FUS:432	AGDWKCPNPTCENMNFSWR-LKGEATVSFDDPPSAK-a5-b2	FUS	FUS	intra-protein link	432	339	0	32.7	0	3	75 mM KCl
FUS:339:x:FUS:453	NECNQCKAPKPDGPGGGPGGSHMGGNYGDDR-LKGEATVSFDDPPSAK-a7-b2	FUS	FUS	intra-protein link	453	339	0	26.74	0.019	2	500 mM KCl
FUS:339:x:FUS:456	APKPDGPGGGPGGSHMGGNYGDDR-LKGEATVSFDDPPSAK-a3-b2	FUS	FUS	intra-protein link	456	339	0.34	30.41	0.048	3	75 mM KCl
FUS:339:x:FUS:456	APKPDGPGGGPGGSHMGGNYGDDR-LKGEATVSFDDPPSAK-a3-b2	FUS	FUS	intra-protein link	456	339	0	30.06	0.019	3	500 mM KCl
FUS:339:x:FUS:515	LKGEATVSFDDPPSAK-GGFGPGKMDSR-a2-b7	FUS	FUS	intra-protein link	339	515	0.36	42.45	0	3	500 mM KCl
FUS:339:x:FUS:515	LKGEATVSFDDPPSAK-GGFGPGKMDSR-a2-b7	FUS	FUS	intra-protein link	339	515	0	39.42	0	3	75 mM KCl
FUS:353	GEATVSFDDPPSAKAAIDWFDGK-K14-155	FUS	-	monolink	353		0.06	37.3	0	3	500 mM KCl
FUS:353	GEATVSFDDPPSAKAAIDWFDGK-K14-155	FUS	-	monolink	353		0.16	30.28	0	3	75 mM KCl
FUS:362	AAIDWFDGKEFSGNPIK-K9-155	FUS	-	monolink	362		0.06	56.95	0	3	75 mM KCl
FUS:362	AAIDWFDGKEFSGNPIK-K9-155	FUS	-	monolink	362		0	53.44	0	3	500 mM KCl
FUS:362:x:FUS:362	AAIDWFDGKEFSGNPIK-AAIDWFDGKEFSGNPIK-a9-b9	FUS	FUS	intra-protein link	362	362	0.71	42.76	0	3	500 mM KCl
FUS:362:x:FUS:362	AAIDWFDGKEFSGNPIK-AAIDWFDGKEFSGNPIK-a9-b9	FUS	FUS	intra-protein link	362	362	0	41.73	0	3	75 mM KCl
FUS:362:x:FUS:370	AAIDWFDGKEFSGNPIKVSFATR-K9-K17	FUS	-	looplink	362	370	0	39.42	0	3	500 mM KCl
FUS:362:x:FUS:370	AAIDWFDGKEFSGNPIKVSFATR-K9-K17	FUS	-	looplink	362	370	0	38.6	0	3	75 mM KCl
FUS:362:x:FUS:370	AAIDWFDGKEFSGNPIK-EFSGNPIKVSFATR-a9-b8	FUS	FUS	intra-protein link	362	370	0.7	31.73	0	3	75 mM KCl
FUS:362:x:FUS:370	AAIDWFDGKEFSGNPIK-EFSGNPIKVSFATR-a9-b8	FUS	FUS	intra-protein link	362	370	0.61	28.66	0	3	500 mM KCl
FUS:362:x:FUS:432	AGDWKCPNPTCENMNFSWR-AAIDWFDGKEFSGNPIK-a5-b9	FUS	FUS	intra-protein link	432	362	0.37	45.05	0	3	500 mM KCl
FUS:362:x:FUS:432	AGDWKCPNPTCENMNFSWR-AAIDWFDGKEFSGNPIK-a5-b9	FUS	FUS	intra-protein link	432	362	0.42	41.16	0	3	75 mM KCl
FUS:362:x:FUS:456	APKPDGPGGGPGGSHMGGNYGDDR-AAIDWFDGKEFSGNPIK-a3-b9	FUS	FUS	intra-protein link	456	362	0	37.42	0	3	500 mM KCl
FUS:362:x:FUS:456	APKPDGPGGGPGGSHMGGNYGDDR-AAIDWFDGKEFSGNPIK-a3-b9	FUS	FUS	intra-protein link	456	362	0.24	29.41	0	3	75 mM KCl
FUS:362:x:FUS:515	AAIDWFDGKEFSGNPIK-GGFGPGKMDSR-a9-b7	FUS	FUS	intra-protein link	362	515	0.1	39.48	0	3	500 mM KCl
FUS:362:x:FUS:515	AAIDWFDGKEFSGNPIK-GGFGPGKMDSR-a9-b7	FUS	FUS	intra-protein link	362	515	0	39.12	0	3	75 mM KCl
FUS:370	AAIDWFDGKEFSGNPIKVSFATR-K17-156	FUS	-	monolink	370		0	51.07	0	3	500 mM KCl
FUS:370	AAIDWFDGKEFSGNPIKVSFATR-K17-156	FUS	-	monolink	370		0	46.75	0	3	75 mM KCl
FUS:370:x:FUS:515	EFSGNPIKVSFATR-GGFGPGKMDSR-a8-b7	FUS	FUS	intra-protein link	370	515	0.69	37.01	0	3	75 mM KCl
FUS:370:x:FUS:515	EFSGNPIKVSFATR-GGFGPGKMDSR-a8-b7	FUS	FUS	intra-protein link	370	515	0	32.34	0	3	500 mM KCl
FUS:432	AGDWKCPNPTCENMNFSWR-K5-155	FUS	-	monolink	432		0	40.56	0	3	75 mM KCl
FUS:432	AGDWKCPNPTCENMNFSWR-K5-156	FUS	-	monolink	432		0.08	36.46	0	3	500 mM KCl
FUS:432:x:FUS:456	APKPDGPGGGPGGSHMGGNYGDDR-AGDWKCPNPTCENMNFSWR-a3-b5	FUS	FUS	intra-protein link	456	432	0	32.72	0.019	3	500 mM KCl
FUS:432:x:FUS:515	AGDWKCPNPTCENMNFSWR-GGFGPGKMDSR-a5-b7	FUS	FUS	intra-protein link	432	515	0	41.07	0	3	500 mM KCl
FUS:453	NECNQCKAPKPDGPGGGPGGSHMGGNYGDDR-K7-155	FUS	-	monolink	453		0.06	37.08	0	3	500 mM KCl
FUS:453	NECNQCKAPKPDGPGGGPGGSHMGGNYGDDR-K7-155	FUS	-	monolink	453		0.01	35.61	0	3	75 mM KCl
FUS:453:x:FUS:456	NECNQCKAPKPDGPGGGPGGSHMGGNYGDDR-K7-K10	FUS	-	looplink	453	456	0	31.54	0	3	500 mM KCl
FUS:453:x:FUS:456	NECNQCKAPKPDGPGGGPGGSHMGGNYGDDR-K7-K10	FUS	-	looplink	453	456	0.02	29.45	0	3	75 mM KCl
FUS:453:x:FUS:515	NECNQCKAPKPDGPGGGPGGSHMGGNYGDDR-GGFGPGKMDSR-a7-b7	FUS	FUS	intra-protein link	453	515	0	36.9	0	3	500 mM KCl
FUS:453:x:FUS:515	NECNQCKAPKPDGPGGGPGGSHMGGNYGDDR-GGFGPGKMDSR-a7-b7	FUS	FUS	intra-protein link	453	515	0.5	30.06	0.033	3	75 mM KCl
FUS:456	APKPDGPGGGPGGSHMGGNYGDDR-K3-155	FUS	-	monolink	456		0	34	0	3	500 mM KCl
FUS:456	APKPDGPGGGPGGSHMGGNYGDDR-K3-155	FUS	-	monolink	456		0	33.02	0	3	75 mM KCl
FUS:456:x:FUS:515	APKPDGPGGGPGGSHMGGNYGDDR-GGFGPGKMDSR-a3-b7	FUS	FUS	intra-protein link	456	515	0	28.91	0	3	500 mM KCl
FUS:456:x:FUS:515	APKPDGPGGGPGGSHMGGNYGDDR-GGFGPGKMDSR-a3-b7	FUS	FUS	intra-protein link	456	515	0	28.16	0.033	2	75 mM KCl
FUS:515:x:FUS:515	GGFGPGKMDSR-GGFGPGKMDSR-a7-b7	FUS	FUS	intra-protein link	515	515	0	38.04	0	3	75 mM KCl

## Sheet: Table S6
Supplemental Table 6. FUS Salt 3 Experiment Crosslink Quantification. Related to Figure 1A, 1B
Quantifiaction for each unique crosslinking site shown in Table S5
uxID	experiment	link_type	ms1_area_sum	imputed	ms1_area_sum_ref	imputed_ref	log2ratio	referenceexperiment	pvalue	FDR
FUS:269:x:FUS:317	75 mM KCl	xlink	25.7674	0	26.0629	0	-0.295508	500 mM KCl	0.0791413	0.106948
FUS:269:x:FUS:321	75 mM KCl	xlink	26.3077	0	27.0846	0	-0.776952	500 mM KCl	0.00665315	0.0144634
FUS:269:x:FUS:339	75 mM KCl	xlink	28.2253	0	28.2755	0	-0.0501901	500 mM KCl	0.692262	0.76918
FUS:269:x:FUS:362	75 mM KCl	xlink	29.0745	0	28.8798	0	0.194659	500 mM KCl	0.0261704	0.0422103
FUS:269:x:FUS:370	75 mM KCl	xlink	27.4703	0	27.3101	0	0.160184	500 mM KCl	0.618355	0.702676
FUS:269:x:FUS:515	75 mM KCl	xlink	26.0113	0	26.7788	0	-0.76751	500 mM KCl	0.00299844	0.00749611
FUS:311	75 mM KCl	monolink	26.2302	0	26.829	0	-0.598721	500 mM KCl	0.153704	0.197056
FUS:317:x:FUS:321	75 mM KCl	xlink	34.9179	0	34.711	0	0.206929	500 mM KCl	0.0025609	0.0067392
FUS:317:x:FUS:339	75 mM KCl	xlink	26.3204	0	24.7871	0	1.53332	500 mM KCl	0.000293316	0.00104756
FUS:317:x:FUS:362	75 mM KCl	xlink	29.6836	0	27.5964	0	2.08721	500 mM KCl	2.86e-08	3.57e-07
FUS:317:x:FUS:515	75 mM KCl	xlink	26.9793	0	25.6907	0	1.28865	500 mM KCl	0.000489625	0.00163208
FUS:320:x:FUS:321	75 mM KCl	looplink	28.9727	0	28.7641	0	0.208546	500 mM KCl	0.0600953	0.0858504
FUS:320:x:FUS:515	75 mM KCl	xlink	24.5367	0	23.4983	0	1.03834	500 mM KCl	0.00350157	0.00833707
FUS:321	75 mM KCl	monolink	31.19	0	31.5577	0	-0.367707	500 mM KCl	0.0140069	0.0266899
FUS:321:x:FUS:339	75 mM KCl	xlink	28.2323	0	26.9834	0	1.24882	500 mM KCl	0.000528219	0.00165068
FUS:321:x:FUS:362	75 mM KCl	xlink	30.1599	0	28.0968	0	2.06317	500 mM KCl	1e-08	2.4e-07
FUS:321:x:FUS:370	75 mM KCl	xlink	27.3078	0	23.7884	1	3.51942	500 mM KCl	7.55e-07	5.39e-06
FUS:321:x:FUS:432	75 mM KCl	xlink	24.9039	0	26.5104	0	-1.60642	500 mM KCl	0.0482495	0.0709551
FUS:321:x:FUS:456	75 mM KCl	xlink	27.5068	0	26.7428	0	0.764002	500 mM KCl	0.000291431	0.00104756
FUS:321:x:FUS:515	75 mM KCl	xlink	26.0431	0	23.5244	1	2.51868	500 mM KCl	0.0144126	0.0266899
FUS:337	75 mM KCl	monolink	31.5877	0	31.4137	0	0.173953	500 mM KCl	0.716328	0.774984
FUS:337:x:FUS:339	75 mM KCl	looplink	30.3288	0.166667	30.7964	0.0833333	-0.467583	500 mM KCl	0.728485	0.774984
FUS:337:x:FUS:370	75 mM KCl	xlink	30.2553	0	29.9781	0	0.277271	500 mM KCl	0.028302	0.0442218
FUS:337:x:FUS:515	75 mM KCl	xlink	25.8826	0	23.8505	0	2.03206	500 mM KCl	1.42e-07	1.18e-06
FUS:339	75 mM KCl	monolink	32.3876	0	31.7996	0	0.588013	500 mM KCl	0.0694959	0.0965221
FUS:339:x:FUS:362	75 mM KCl	xlink	29.6734	0	28.4025	0	1.2709	500 mM KCl	1.5e-05	8.33e-05
FUS:339:x:FUS:370	75 mM KCl	xlink	29.6252	0	29.7898	0	-0.164569	500 mM KCl	0.821288	0.838049
FUS:339:x:FUS:432	75 mM KCl	xlink	25.3344	0	26.4637	0	-1.12933	500 mM KCl	0.00936626	0.0195131
FUS:339:x:FUS:453	75 mM KCl	xlink	26.2455	0	25.7492	0	0.496226	500 mM KCl	0.0197265	0.0328775
FUS:339:x:FUS:456	75 mM KCl	xlink	28.9313	0	28.3227	0	0.608608	500 mM KCl	0.00103585	0.00304663
FUS:339:x:FUS:515	75 mM KCl	xlink	29.0794	0	27.9171	0	1.16229	500 mM KCl	1.26e-07	1.18e-06
FUS:353	75 mM KCl	monolink	29.0488	0	28.6337	0	0.415106	500 mM KCl	0.128441	0.169002
FUS:362	75 mM KCl	monolink	31.3858	0	32.0683	0	-0.682501	500 mM KCl	0.313025	0.372649
FUS:362:x:FUS:362	75 mM KCl	xlink	27.0778	0	25.7202	0	1.35755	500 mM KCl	2.98e-05	0.000135492
FUS:362:x:FUS:370	75 mM KCl	looplink	25.2952	0	24.7763	0	0.518872	500 mM KCl	0.0419796	0.0636055
FUS:362:x:FUS:370	75 mM KCl	xlink	28.4949	0	26.1229	0	2.37207	500 mM KCl	1.44e-08	2.4e-07
FUS:362:x:FUS:432	75 mM KCl	xlink	26.7886	0	26.889	0	-0.100383	500 mM KCl	0.744926	0.775964
FUS:362:x:FUS:456	75 mM KCl	xlink	29.5458	0	28.5786	0	0.967278	500 mM KCl	5.02e-05	0.000209331
FUS:362:x:FUS:515	75 mM KCl	xlink	30.6306	0	29.6697	0	0.960889	500 mM KCl	1.28e-06	8.03e-06
FUS:370	75 mM KCl	monolink	30.911	0	30.7276	0	0.183312	500 mM KCl	0.296877	0.362046
FUS:370:x:FUS:515	75 mM KCl	xlink	28.4794	0	26.9832	0	1.49621	500 mM KCl	1.65e-09	8.27e-08
FUS:432	75 mM KCl	monolink	29.4889	0	29.0813	0	0.407579	500 mM KCl	0.854468	0.854468
FUS:432:x:FUS:456	75 mM KCl	xlink	27.3463	0	28.213	0	-0.866655	500 mM KCl	0.00234364	0.00651011
FUS:432:x:FUS:515	75 mM KCl	xlink	26.9485	0	27.7959	0	-0.847439	500 mM KCl	0.0179452	0.0320451
FUS:453	75 mM KCl	monolink	33.2284	0	32.9043	0	0.324018	500 mM KCl	0.174478	0.218097
FUS:453:x:FUS:456	75 mM KCl	looplink	32.9286	0	33.2655	0	-0.336953	500 mM KCl	0.00648289	0.0144634
FUS:453:x:FUS:515	75 mM KCl	xlink	27.1283	0	27.4319	0	-0.303619	500 mM KCl	0.0109983	0.0219966
FUS:456	75 mM KCl	monolink	34.7545	0	34.8296	0	-0.075073	500 mM KCl	0.341366	0.396938
FUS:456:x:FUS:515	75 mM KCl	xlink	29.5195	0	29.1879	0	0.331569	500 mM KCl	0.0192187	0.0328775
FUS:515:x:FUS:515	75 mM KCl	xlink	27.3814	0	25.7919	0	1.58954	500 mM KCl	2.66e-05	0.000132885
