# Supplementary material for: HspB8 prevents aberrant phase transitions of FUS by chaperoning its folded RNA-binding domain
Source: eLife. 2021 Sep 6;10:e69377. doi: 10.7554/eLife.69377 (PMC8510580; doi:10.7554/eLife.69377)
Supplement: Supplementary file 2. [file elife-69377-supp2.xlsx]

## Sheet: Legend
Legends for Supplemental Data 2
Supplemental Table 1. FUS Aging Experiment Crosslink Identification. Related to Figure 1C, S1D,E and F
Supplemental Table 2. FUS Aging Experiment Crosslink Quantification. Related to Figure 1C, S1D,E and F
Supplemental Table 3. Test of short Crosslinking times. Related to Figure S1C
Supplemental Table 4. FUS Aging Experiment unique uxIDs. Related to Figure 1C
Supplemental Table 5. FUSB8 Aging Experiment Crosslink Identification. Related to Figure S3H
Supplemental Table 6. FUSB8 Aging Experiment Crosslink Quantification. Related to Figure S3I
Legend referring to Tables S1, S3 and S4
uxID	unique lysine to lysine crosslinking site, includes crosslinked protein names and absolute position of crosslinked lysine. All peptides linking the same lysines (different cleavage sites, charge states and heavy/light pairs) belong to a single uxID
Id	amino acid sequence of crosslinked peptide a and peptide b including the position of crosslinking sites in peptide a and peptide b
Protein1	name of protein to which peptide a belongs
Protein2	name of protein to which peptide b belongs
XLType	type of linker attachment (inter-protein crosslink, intra-protein crosslink, looplink or monolink).Looplink, a link between two lysines within one peptide.
AbsPos1	absolute position of crosslinked lysine residue in protein 1 (including 5 AA N-terminal tag)
AbsPos2	absolute position of crosslinked lysine residue in protein 2 (including 5 AA N-terminal tag)
deltaS	deltaS score is a measure for how close the best assigned hit scored in regard to second best
ld-Score	linear discriminant score; scoring scheme to discriminate between true positive crosslinks and false positive hits																									FDR	FDR	FDR	FDR	FDR	FDR	FDR	FDR	FDR	FDR	FDR	FDR	FDR	FDR	FDR	FDR	FDR	FDR	FDR	FDR	FDR	FDR	FDR	FDR
FDR	FDR was calculated by xProphet as described (Leitner et al., Nat Protoc, 2014). FDR filtering was done on the uxID level and only uxIDs with an FDR ≤ 0.05 in at least one replicate were considered
No of Ids in triplicates	indicates in how many of three replicates the corresponding uxID was identified
Legend referring to Tables S2
uxID	unique lysine to lysine crosslinking site, includes crosslinked protein names and absolute position of crosslinked lysine. All peptides linking the same lysines (different cleavage sites, charge states and heavy/light pairs) belong to a single uxID
experiment	the condition used for relative quantification relative to the reference condition
link_type	type of linker attachment (inter-protein crosslink, intra-protein crosslink, looplink or monolink).Looplink, a link between two lysines within one peptide.
ms1_area_sum	log2 converted peak area of the extracted total ion chromatogram (MS1 intensity along retention time) for the corresponding uxID within an experiment. Peak areas of different peptides connecting the same lysines are summed up but for a light/heavy pair as well as biological replicates of the same peptide the mean is taken.
imputed	a value between 0-2 indicating the fraction of imputed peptide observations for a given uxID corresponding to the current experiment condition
ms1_area_sum_ref	log2 converted peak area of the extracted total ion chromatogram (MS1 intensity along retention time) for the corresponding uxID within the reference experiment. Peak areas of different peptides connecting the same lysines are summed up but for a light/heavy pair as well as biological replicates of the same peptide the mean is taken.
imputed_ref	a value between 0-2 indicating the fraction of imputed peptide observations for a given uxID corresponding to the reference experiment condition
log2ratio	the log2 ratio of the experiment vs. the reference experiment. Calculated as difference between ms1_area_sum and ms1_area_sum_ref
reference experiment	the condition which was used as reference for relative quantification
pvalue	p-value as calculated by a two-sided t-test using the peptide observations of the log2 converted peak area of the experiment and reference experiment as input (light/heavy pairs and biological replicates as input observations)
FDR	p-values corrected for multiple testing following the Benjamini–Hochberg procedure
[truncated: 5,000 more columns]

## Sheet: Table S1
Supplemental Table 1. FUS Aging Experiment Crosslink Identification. Related to Figure 1C, S1D,E and F
Crosslinks were only considered, if they were identified in two out of three replicates with a deltaS < 0.95, a minimum Id score ≥ 20 and an ld score ≥ 25 in at least one replicate (filtering was done on the level of the unique Crosslinking site) and an FDR < 0.05 as calculated by xProphet for at least one replicate.
Only the highest scoring crosslink from three replicates is shown.
uxID	Id	Protein1	Protein2	XLType	AbsPos1	AbsPos2	deltaS	ld-Score	FDR	time point	No of Ids in triplicates
FUS:515:x:FUS:515	GGFGPGKMDSR-GGFGPGKMDSR-a7-b7	FUS	FUS	intra-protein xl	515	515	0	41.53	0	T11	3
FUS:515:x:FUS:515	GGFGPGKMDSR-GGFGPGKMDSR-a7-b7	FUS	FUS	intra-protein xl	515	515	0	40.74	0	T1	3
FUS:515:x:FUS:515	GGFGPGKMDSR-GGFGPGKMDSR-a7-b7	FUS	FUS	intra-protein xl	515	515	0.78	39.79	0	T4	3
FUS:515:x:FUS:515	GGFGPGKMDSR-GGFGPGKMDSR-a7-b7	FUS	FUS	intra-protein xl	515	515	0.83	39.35	0	T5	3
FUS:515:x:FUS:515	GGFGPGKMDSR-GGFGPGKMDSR-a7-b7	FUS	FUS	intra-protein xl	515	515	0.78	39.09	0	T3	3
FUS:515:x:FUS:515	GGFGPGKMDSR-GGFGPGKMDSR-a7-b7	FUS	FUS	intra-protein xl	515	515	0.83	38.65	0	T2	3
FUS:515:x:FUS:515	GGFGPGKMDSR-GGFGPGKMDSR-a7-b7	FUS	FUS	intra-protein xl	515	515	0.67	38.04	0.019	T8	3
FUS:515:x:FUS:515	GGFGPGKMDSR-GGFGPGKMDSR-a7-b7	FUS	FUS	intra-protein xl	515	515	0	37.51	0.034	T6	3
FUS:515:x:FUS:515	GGFGPGKMDSR-GGFGPGKMDSR-a7-b7	FUS	FUS	intra-protein xl	515	515	0.72	37.14	0.02	T9	3
FUS:515:x:FUS:515	GGFGPGKMDSR-GGFGPGKMDSR-a7-b7	FUS	FUS	intra-protein xl	515	515	0	36.5	0	T7	3
FUS:515:x:FUS:515	GGFGPGKMDSR-GGFGPGKMDSR-a7-b7	FUS	FUS	intra-protein xl	515	515	0	36.1	0	T10	3
FUS:456:x:FUS:515	APKPDGPGGGPGGSHMGGNYGDDR-GGFGPGKMDSR-a3-b7	FUS	FUS	intra-protein xl	456	515	0.56	38.86	0	T11	3
FUS:456:x:FUS:515	NECNQCKAPKPDGPGGGPGGSHMGGNYGDDR-GGFGPGKMDSR-a10-b7	FUS	FUS	intra-protein xl	456	515	0.67	37.13	0	T1	3
FUS:456:x:FUS:515	APKPDGPGGGPGGSHMGGNYGDDR-GGFGPGKMDSR-a3-b7	FUS	FUS	intra-protein xl	456	515	0	35.98	0.019	T8	2
FUS:456:x:FUS:515	APKPDGPGGGPGGSHMGGNYGDDR-GGFGPGKMDSR-a3-b7	FUS	FUS	intra-protein xl	456	515	0.41	35.82	0	T7	2
FUS:456:x:FUS:515	APKPDGPGGGPGGSHMGGNYGDDR-GGFGPGKMDSR-a3-b7	FUS	FUS	intra-protein xl	456	515	0.46	35.12	0	T2	3
FUS:456:x:FUS:515	APKPDGPGGGPGGSHMGGNYGDDR-GGFGPGKMDSR-a3-b7	FUS	FUS	intra-protein xl	456	515	0.45	35.03	0.029	T10	3
FUS:456:x:FUS:515	APKPDGPGGGPGGSHMGGNYGDDR-GGFGPGKMDSR-a3-b7	FUS	FUS	intra-protein xl	456	515	0.44	35.02	0	T4	3
FUS:456:x:FUS:515	APKPDGPGGGPGGSHMGGNYGDDR-GGFGPGKMDSR-a3-b7	FUS	FUS	intra-protein xl	456	515	0	34.63	0	T5	3
FUS:456:x:FUS:515	APKPDGPGGGPGGSHMGGNYGDDR-GGFGPGKMDSR-a3-b7	FUS	FUS	intra-protein xl	456	515	0	34.4	0	T6	3
FUS:456:x:FUS:515	APKPDGPGGGPGGSHMGGNYGDDR-GGFGPGKMDSR-a3-b7	FUS	FUS	intra-protein xl	456	515	0.46	32.34	0.02	T9	3
FUS:456:x:FUS:515	APKPDGPGGGPGGSHMGGNYGDDR-GGFGPGKMDSR-a3-b7	FUS	FUS	intra-protein xl	456	515	0.51	31.46	0	T3	3
FUS:456	APKPDGPGGGPGGSHMGGNYGDDR-K3-155	FUS	-	monolink	456		0	42.09	0	T10	3
FUS:456	APKPDGPGGGPGGSHMGGNYGDDR-K3-155	FUS	-	monolink	456		0	42.07	0	T8	3
FUS:456	APKPDGPGGGPGGSHMGGNYGDDR-K3-155	FUS	-	monolink	456		0	41.24	0	T7	3
FUS:456	APKPDGPGGGPGGSHMGGNYGDDR-K3-155	FUS	-	monolink	456		0	39.74	0	T9	3
FUS:456	APKPDGPGGGPGGSHMGGNYGDDR-K3-155	FUS	-	monolink	456		0	39.06	0	T1	3
FUS:456	APKPDGPGGGPGGSHMGGNYGDDRR-K3-156	FUS	-	monolink	456		0	38.86	0	T5	3
FUS:456	APKPDGPGGGPGGSHMGGNYGDDRR-K3-155	FUS	-	monolink	456		0	37.92	0	T11	3
FUS:456	APKPDGPGGGPGGSHMGGNYGDDR-K3-156	FUS	-	monolink	456		0	37.64	0	T4	3
FUS:456	APKPDGPGGGPGGSHMGGNYGDDR-K3-155	FUS	-	monolink	456		0	37.54	0	T2	3
FUS:456	APKPDGPGGGPGGSHMGGNYGDDRR-K3-155	FUS	-	monolink	456		0	37.24	0	T6	3
FUS:456	APKPDGPGGGPGGSHMGGNYGDDRR-K3-155	FUS	-	monolink	456		0	35.13	0	T3	3
FUS:453:x:FUS:515	NECNQCKAPKPDGPGGGPGGSHMGGNYGDDR-GGFGPGKMDSR-a7-b7	FUS	FUS	intra-protein xl	453	515	0.54	42.17	0	T10	3
FUS:453:x:FUS:515	NECNQCKAPKPDGPGGGPGGSHMGGNYGDDR-GGFGPGKMDSR-a7-b7	FUS	FUS	intra-protein xl	453	515	0.64	41.9	0	T11	3
FUS:453:x:FUS:515	NECNQCKAPKPDGPGGGPGGSHMGGNYGDDR-GGFGPGKMDSR-a7-b7	FUS	FUS	intra-protein xl	453	515	0.67	41.5	0	T4	3
FUS:453:x:FUS:515	NECNQCKAPKPDGPGGGPGGSHMGGNYGDDR-GGFGPGKMDSR-a7-b7	FUS	FUS	intra-protein xl	453	515	0.61	41.07	0	T8	3
FUS:453:x:FUS:515	NECNQCKAPKPDGPGGGPGGSHMGGNYGDDR-GGFGPGKMDSR-a7-b7	FUS	FUS	intra-protein xl	453	515	0.68	40.34	0	T2	3
FUS:453:x:FUS:515	NECNQCKAPKPDGPGGGPGGSHMGGNYGDDR-GGFGPGKMDSR-a7-b7	FUS	FUS	intra-protein xl	453	515	0.64	39.95	0	T6	3
FUS:453:x:FUS:515	NECNQCKAPKPDGPGGGPGGSHMGGNYGDDR-GGFGPGKMDSR-a7-b7	FUS	FUS	intra-protein xl	453	515	0.65	39.38	0	T9	3
FUS:453:x:FUS:515	NECNQCKAPKPDGPGGGPGGSHMGGNYGDDR-GGFGPGKMDSR-a7-b7	FUS	FUS	intra-protein xl	453	515	0.5	39.27	0	T3	3
FUS:453:x:FUS:515	NECNQCKAPKPDGPGGGPGGSHMGGNYGDDR-GGFGPGKMDSR-a7-b7	FUS	FUS	intra-protein xl	453	515	0.66	38.6	0	T5	3
FUS:453:x:FUS:515	NECNQCKAPKPDGPGGGPGGSHMGGNYGDDR-GGFGPGKMDSR-a7-b7	FUS	FUS	intra-protein xl	453	515	0.7	36.51	0	T1	3
FUS:453:x:FUS:515	NECNQCKAPKPDGPGGGPGGSHMGGNYGDDR-GGFGPGKMDSR-a7-b7	FUS	FUS	intra-protein xl	453	515	0.74	36.02	0	T7	3
FUS:453:x:FUS:456	NECNQCKAPKPDGPGGGPGGSHMGGNYGDDR-K7-K10	FUS	-	looplink	453	456	0.02	33.65	0	T7	3
FUS:453:x:FUS:456	NECNQCKAPKPDGPGGGPGGSHMGGNYGDDR-K7-K10	FUS	-	looplink	453	456	0.14	32.68	0	T10	3
FUS:453:x:FUS:456	NECNQCKAPKPDGPGGGPGGSHMGGNYGDDR-K7-K10	FUS	-	looplink	453	456	0.06	30.95	0	T5	3
FUS:453:x:FUS:456	NECNQCKAPKPDGPGGGPGGSHMGGNYGDDR-K7-K10	FUS	-	looplink	453	456	0	30.5	0	T6	3
FUS:453:x:FUS:456	NECNQCKAPKPDGPGGGPGGSHMGGNYGDDR-K7-K10	FUS	-	looplink	453	456	0.03	30.41	0	T1	3
FUS:453:x:FUS:456	NECNQCKAPKPDGPGGGPGGSHMGGNYGDDR-K7-K10	FUS	-	looplink	453	456	0	30.36	0	T2	3
FUS:453:x:FUS:456	NECNQCKAPKPDGPGGGPGGSHMGGNYGDDR-K7-K10	FUS	-	looplink	453	456	0.18	30.35	0	T8	3
FUS:453:x:FUS:456	NECNQCKAPKPDGPGGGPGGSHMGGNYGDDR-K7-K10	FUS	-	looplink	453	456	0.03	29.85	0	T9	3
FUS:453:x:FUS:456	NECNQCKAPKPDGPGGGPGGSHMGGNYGDDR-K7-K10	FUS	-	looplink	453	456	0	28.98	0	T11	3
FUS:453:x:FUS:456	NECNQCKAPKPDGPGGGPGGSHMGGNYGDDR-K7-K10	FUS	-	looplink	453	456	0.23	25.64	0	T3	3
FUS:453:x:FUS:456	NECNQCKAPKPDGPGGGPGGSHMGGNYGDDR-APKPDGPGGGPGGSHMGGNYGDDR-a7-b3	FUS	FUS	intra-protein xl	453	456	0.73	27.3	0	T4	3
FUS:453	NECNQCKAPKPDGPGGGPGGSHMGGNYGDDR-K7-155	FUS	-	monolink	453		0.05	43.24	0	T10	3
FUS:453	NECNQCKAPKPDGPGGGPGGSHMGGNYGDDR-K7-156	FUS	-	monolink	453		0.1	42.56	0	T5	3
FUS:453	NECNQCKAPKPDGPGGGPGGSHMGGNYGDDR-K7-155	FUS	-	monolink	453		0.12	42.01	0	T6	3
FUS:453	NECNQCKAPKPDGPGGGPGGSHMGGNYGDDR-K7-155	FUS	-	monolink	453		0.08	41.65	0	T9	3
FUS:453	NECNQCKAPKPDGPGGGPGGSHMGGNYGDDR-K7-155	FUS	-	monolink	453		0.13	41.44	0	T7	3
FUS:453	NECNQCKAPKPDGPGGGPGGSHMGGNYGDDR-K7-155	FUS	-	monolink	453		0.12	40.75	0	T8	3
FUS:453	NECNQCKAPKPDGPGGGPGGSHMGGNYGDDR-K7-156	FUS	-	monolink	453		0.07	39.36	0	T1	3
FUS:453	NECNQCKAPKPDGPGGGPGGSHMGGNYGDDR-K7-155	FUS	-	monolink	453		0.12	39.12	0	T2	3
FUS:453	NECNQCKAPKPDGPGGGPGGSHMGGNYGDDR-K7-155	FUS	-	monolink	453		0.06	38.88	0	T3	3
FUS:453	NECNQCKAPKPDGPGGGPGGSHMGGNYGDDR-K7-156	FUS	-	monolink	453		0.12	38.53	0	T11	3
FUS:453	NECNQCKAPKPDGPGGGPGGSHMGGNYGDDR-K7-155	FUS	-	monolink	453		0	38.44	0	T4	3
FUS:432:x:FUS:515	AGDWKCPNPTCENMNFSWR-GGFGPGKMDSR-a5-b7	FUS	FUS	intra-protein xl	432	515	0.44	50.07	0	T6	3
FUS:432:x:FUS:515	AGDWKCPNPTCENMNFSWR-GGFGPGKMDSR-a5-b7	FUS	FUS	intra-protein xl	432	515	0	49.24	0	T5	3
FUS:432:x:FUS:515	AGDWKCPNPTCENMNFSWR-GGFGPGKMDSR-a5-b7	FUS	FUS	intra-protein xl	432	515	0	48.93	0	T4	3
FUS:432:x:FUS:515	AGDWKCPNPTCENMNFSWR-GGFGPGKMDSR-a5-b7	FUS	FUS	intra-protein xl	432	515	0	48.08	0	T9	2
FUS:432:x:FUS:515	AGDWKCPNPTCENMNFSWR-GGFGPGKMDSR-a5-b7	FUS	FUS	intra-protein xl	432	515	0.46	46.57	0	T1	3
FUS:432:x:FUS:515	AGDWKCPNPTCENMNFSWR-GGFGPGKMDSR-a5-b7	FUS	FUS	intra-protein xl	432	515	0	46.07	0	T3	3
FUS:432:x:FUS:515	AGDWKCPNPTCENMNFSWR-GGFGPGKMDSR-a5-b7	FUS	FUS	intra-protein xl	432	515	0	43.55	0	T2	3
FUS:432:x:FUS:515	AGDWKCPNPTCENMNFSWR-GGFGPGKMDSR-a5-b7	FUS	FUS	intra-protein xl	432	515	0.49	42.5	0	T8	3
FUS:432:x:FUS:456	APKPDGPGGGPGGSHMGGNYGDDR-AGDWKCPNPTCENMNFSWR-a3-b5	FUS	FUS	intra-protein xl	456	432	0	42.04	0	T4	2
FUS:432:x:FUS:456	APKPDGPGGGPGGSHMGGNYGDDR-AGDWKCPNPTCENMNFSWR-a3-b5	FUS	FUS	intra-protein xl	456	432	0	38.34	0	T1	2
FUS:432:x:FUS:456	APKPDGPGGGPGGSHMGGNYGDDR-AGDWKCPNPTCENMNFSWR-a3-b5	FUS	FUS	intra-protein xl	456	432	0	34.89	0	T2	3
FUS:432:x:FUS:456	APKPDGPGGGPGGSHMGGNYGDDR-AGDWKCPNPTCENMNFSWR-a3-b5	FUS	FUS	intra-protein xl	456	432	0	34.6	0.019	T8	2
FUS:432:x:FUS:456	APKPDGPGGGPGGSHMGGNYGDDR-AGDWKCPNPTCENMNFSWR-a3-b5	FUS	FUS	intra-protein xl	456	432	0.41	33.23	0	T6	3
FUS:432:x:FUS:456	APKPDGPGGGPGGSHMGGNYGDDR-AGDWKCPNPTCENMNFSWR-a3-b5	FUS	FUS	intra-protein xl	456	432	0.49	31.78	0	T5	3
FUS:432:x:FUS:456	APKPDGPGGGPGGSHMGGNYGDDR-AGDWKCPNPTCENMNFSWR-a3-b5	FUS	FUS	intra-protein xl	456	432	0.42	31.62	0	T7	2
FUS:432:x:FUS:456	APKPDGPGGGPGGSHMGGNYGDDR-AGDWKCPNPTCENMNFSWR-a3-b5	FUS	FUS	intra-protein xl	456	432	0	31.5	0	T9	2
FUS:432:x:FUS:456	APKPDGPGGGPGGSHMGGNYGDDR-AGDWKCPNPTCENMNFSWR-a3-b5	FUS	FUS	intra-protein xl	456	432	0	31.17	0	T3	3
FUS:432:x:FUS:456	APKPDGPGGGPGGSHMGGNYGDDR-AGDWKCPNPTCENMNFSWR-a3-b5	FUS	FUS	intra-protein xl	456	432	0	29.55	0	T11	3
FUS:432:x:FUS:453	NECNQCKAPKPDGPGGGPGGSHMGGNYGDDR-AGDWKCPNPTCENMNFSWR-a7-b5	FUS	FUS	intra-protein xl	453	432	0.63	39.19	0	T11	2
FUS:432:x:FUS:453	NECNQCKAPKPDGPGGGPGGSHMGGNYGDDR-AGDWKCPNPTCENMNFSWR-a7-b5	FUS	FUS	intra-protein xl	453	432	0.45	37.31	0	T5	3
FUS:432:x:FUS:453	NECNQCKAPKPDGPGGGPGGSHMGGNYGDDR-AGDWKCPNPTCENMNFSWR-a7-b5	FUS	FUS	intra-protein xl	453	432	0.32	37.04	0	T2	2
FUS:432:x:FUS:453	NECNQCKAPKPDGPGGGPGGSHMGGNYGDDR-AGDWKCPNPTCENMNFSWR-a7-b5	FUS	FUS	intra-protein xl	453	432	0.75	36.03	0	T4	2
FUS:432:x:FUS:453	NECNQCKAPKPDGPGGGPGGSHMGGNYGDDR-AGDWKCPNPTCENMNFSWR-a7-b5	FUS	FUS	intra-protein xl	453	432	0.41	35.33	0	T1	3
FUS:432:x:FUS:453	NECNQCKAPKPDGPGGGPGGSHMGGNYGDDR-AGDWKCPNPTCENMNFSWR-a7-b5	FUS	FUS	intra-protein xl	453	432	0.82	34.38	0	T3	3
FUS:432:x:FUS:453	NECNQCKAPKPDGPGGGPGGSHMGGNYGDDR-AGDWKCPNPTCENMNFSWR-a7-b5	FUS	FUS	intra-protein xl	453	432	0.64	33.44	0	T8	2
FUS:432:x:FUS:453	NECNQCKAPKPDGPGGGPGGSHMGGNYGDDR-AGDWKCPNPTCENMNFSWR-a7-b5	FUS	FUS	intra-protein xl	453	432	0.86	32.31	0	T6	2
FUS:432:x:FUS:432	AGDWKCPNPTCENMNFSWR-AGDWKCPNPTCENMNFSWR-a5-b5	FUS	FUS	intra-protein xl	432	432	0	35.97	0.034	T6	2
FUS:432:x:FUS:432	AGDWKCPNPTCENMNFSWR-AGDWKCPNPTCENMNFSWR-a5-b5	FUS	FUS	intra-protein xl	432	432	0	35.71	0	T4	2
FUS:432:x:FUS:432	AGDWKCPNPTCENMNFSWR-AGDWKCPNPTCENMNFSWR-a5-b5	FUS	FUS	intra-protein xl	432	432	0	33.43	0	T3	3
FUS:432	AGDWKCPNPTCENMNFSWR-K5-155	FUS	-	monolink	432		0.02	48.9	0	T11	3
FUS:432	AGDWKCPNPTCENMNFSWR-K5-155	FUS	-	monolink	432		0	48.37	0	T7	3
FUS:432	AGDWKCPNPTCENMNFSWR-K5-155	FUS	-	monolink	432		0	48.21	0	T9	3
FUS:432	AGDWKCPNPTCENMNFSWR-K5-155	FUS	-	monolink	432		0.05	47.36	0	T3	3
FUS:432	AGDWKCPNPTCENMNFSWR-K5-155	FUS	-	monolink	432		0	47.3	0	T5	3
FUS:432	AGDWKCPNPTCENMNFSWR-K5-155	FUS	-	monolink	432		0.02	46.4	0	T10	3
FUS:432	AGDWKCPNPTCENMNFSWR-K5-155	FUS	-	monolink	432		0.06	46.36	0	T4	3
FUS:432	AGDWKCPNPTCENMNFSWR-K5-155	FUS	-	monolink	432		0.07	45.54	0	T2	3
FUS:432	AGDWKCPNPTCENMNFSWR-K5-155	FUS	-	monolink	432		0.11	45.31	0	T6	3
FUS:432	AGDWKCPNPTCENMNFSWR-K5-155	FUS	-	monolink	432		0	45.06	0	T8	3
FUS:432	AGDWKCPNPTCENMNFSWR-K5-155	FUS	-	monolink	432		0	44.09	0	T1	3
FUS:370:x:FUS:515	AAIDWFDGKEFSGNPIKVSFATR-GGFGPGKMDSR-a17-b7	FUS	FUS	intra-protein xl	370	515	0.3	41.42	0	T3	3
FUS:370:x:FUS:515	AAIDWFDGKEFSGNPIKVSFATR-GGFGPGKMDSR-a17-b7	FUS	FUS	intra-protein xl	370	515	0.28	40.87	0	T5	3
FUS:370:x:FUS:515	AAIDWFDGKEFSGNPIKVSFATR-GGFGPGKMDSR-a17-b7	FUS	FUS	intra-protein xl	370	515	0.26	40.52	0	T4	3
FUS:370:x:FUS:515	AAIDWFDGKEFSGNPIKVSFATR-GGFGPGKMDSR-a17-b7	FUS	FUS	intra-protein xl	370	515	0.22	39.69	0	T11	3
FUS:370:x:FUS:515	AAIDWFDGKEFSGNPIKVSFATR-GGFGPGKMDSR-a17-b7	FUS	FUS	intra-protein xl	370	515	0.42	39.52	0	T6	3
FUS:370:x:FUS:515	AAIDWFDGKEFSGNPIKVSFATR-GGFGPGKMDSR-a17-b7	FUS	FUS	intra-protein xl	370	515	0.32	38.44	0.02	T2	3
FUS:370:x:FUS:515	AAIDWFDGKEFSGNPIKVSFATR-GGFGPGKMDSR-a17-b7	FUS	FUS	intra-protein xl	370	515	0.25	37.97	0	T7	3
FUS:370:x:FUS:515	AAIDWFDGKEFSGNPIKVSFATR-GGFGPGKMDSR-a17-b7	FUS	FUS	intra-protein xl	370	515	0.46	37.78	0.019	T8	3
FUS:370:x:FUS:515	AAIDWFDGKEFSGNPIKVSFATR-GGFGPGKMDSR-a17-b7	FUS	FUS	intra-protein xl	370	515	0.36	36.15	0	T1	3
FUS:370:x:FUS:515	AAIDWFDGKEFSGNPIKVSFATR-GGFGPGKMDSR-a17-b7	FUS	FUS	intra-protein xl	370	515	0.31	35.97	0.02	T9	3
FUS:370:x:FUS:515	AAIDWFDGKEFSGNPIKVSFATR-GGFGPGKMDSR-a17-b7	FUS	FUS	intra-protein xl	370	515	0.35	35.77	0	T10	3
FUS:370:x:FUS:456	APKPDGPGGGPGGSHMGGNYGDDR-EFSGNPIKVSFATR-a3-b8	FUS	FUS	intra-protein xl	456	370	0	33.64	0	T6	3
FUS:370:x:FUS:456	APKPDGPGGGPGGSHMGGNYGDDR-EFSGNPIKVSFATR-a3-b8	FUS	FUS	intra-protein xl	456	370	0	31.41	0	T7	3
FUS:370:x:FUS:456	APKPDGPGGGPGGSHMGGNYGDDR-EFSGNPIKVSFATR-a3-b8	FUS	FUS	intra-protein xl	456	370	0	31.07	0.02	T9	3
FUS:370:x:FUS:456	APKPDGPGGGPGGSHMGGNYGDDR-EFSGNPIKVSFATR-a3-b8	FUS	FUS	intra-protein xl	456	370	0.19	29.61	0	T1	2
FUS:370:x:FUS:456	APKPDGPGGGPGGSHMGGNYGDDR-EFSGNPIKVSFATR-a3-b8	FUS	FUS	intra-protein xl	456	370	0	28.55	0.02	T2	3
FUS:370:x:FUS:456	APKPDGPGGGPGGSHMGGNYGDDR-EFSGNPIKVSFATR-a3-b8	FUS	FUS	intra-protein xl	456	370	0	28.37	0	T3	3
FUS:370:x:FUS:456	APKPDGPGGGPGGSHMGGNYGDDR-EFSGNPIKVSFATR-a3-b8	FUS	FUS	intra-protein xl	456	370	0	27.47	0.062	T8	2
FUS:370:x:FUS:456	APKPDGPGGGPGGSHMGGNYGDDR-EFSGNPIKVSFATR-a3-b8	FUS	FUS	intra-protein xl	456	370	0	27.45	0.044	T10	2
FUS:370:x:FUS:456	APKPDGPGGGPGGSHMGGNYGDDR-EFSGNPIKVSFATR-a3-b8	FUS	FUS	intra-protein xl	456	370	0	27.05	0.036	T5	3
FUS:370:x:FUS:456	APKPDGPGGGPGGSHMGGNYGDDR-EFSGNPIKVSFATR-a3-b8	FUS	FUS	intra-protein xl	456	370	0	26.78	0.014	T4	3
FUS:370:x:FUS:453	NECNQCKAPKPDGPGGGPGGSHMGGNYGDDR-EFSGNPIKVSFATR-a7-b8	FUS	FUS	intra-protein xl	453	370	0.73	31.42	0	T3	3
FUS:370:x:FUS:453	NECNQCKAPKPDGPGGGPGGSHMGGNYGDDR-EFSGNPIKVSFATR-a7-b8	FUS	FUS	intra-protein xl	453	370	0.73	29.33	0.021	T5	2
FUS:370:x:FUS:453	NECNQCKAPKPDGPGGGPGGSHMGGNYGDDR-EFSGNPIKVSFATR-a7-b8	FUS	FUS	intra-protein xl	453	370	0.74	29.19	0.018	T4	2
FUS:370:x:FUS:453	NECNQCKAPKPDGPGGGPGGSHMGGNYGDDR-EFSGNPIKVSFATR-a7-b8	FUS	FUS	intra-protein xl	453	370	0.69	28	0	T2	2
FUS:370:x:FUS:453	NECNQCKAPKPDGPGGGPGGSHMGGNYGDDR-EFSGNPIKVSFATR-a7-b8	FUS	FUS	intra-protein xl	453	370	0.72	27.17	0	T9	2
FUS:370:x:FUS:453	NECNQCKAPKPDGPGGGPGGSHMGGNYGDDR-EFSGNPIKVSFATR-a7-b8	FUS	FUS	intra-protein xl	453	370	0.66	26.51	0.062	T8	2
FUS:370:x:FUS:432	AAIDWFDGKEFSGNPIKVSFATR-AGDWKCPNPTCENMNFSWR-a17-b5	FUS	FUS	intra-protein xl	370	432	0	34.95	0	T4	2
FUS:370:x:FUS:432	AGDWKCPNPTCENMNFSWR-EFSGNPIKVSFATR-a5-b8	FUS	FUS	intra-protein xl	432	370	0	31.41	0	T11	3
FUS:370:x:FUS:432	AGDWKCPNPTCENMNFSWR-EFSGNPIKVSFATR-a5-b8	FUS	FUS	intra-protein xl	432	370	0	31.23	0	T3	3
FUS:370:x:FUS:432	AGDWKCPNPTCENMNFSWR-EFSGNPIKVSFATR-a5-b8	FUS	FUS	intra-protein xl	432	370	0	31.1	0.034	T6	3
FUS:370:x:FUS:432	AGDWKCPNPTCENMNFSWR-EFSGNPIKVSFATR-a5-b8	FUS	FUS	intra-protein xl	432	370	0	30.7	0	T1	2
FUS:370:x:FUS:432	AGDWKCPNPTCENMNFSWR-EFSGNPIKVSFATR-a5-b8	FUS	FUS	intra-protein xl	432	370	0	30.15	0.021	T5	3
FUS:370:x:FUS:432	AGDWKCPNPTCENMNFSWR-EFSGNPIKVSFATR-a5-b8	FUS	FUS	intra-protein xl	432	370	0	29.74	0.02	T9	2
FUS:370:x:FUS:432	AGDWKCPNPTCENMNFSWR-EFSGNPIKVSFATR-a5-b8	FUS	FUS	intra-protein xl	432	370	0	28.64	0.062	T8	2
FUS:370:x:FUS:370	EFSGNPIKVSFATR-EFSGNPIKVSFATR-a8-b8	FUS	FUS	intra-protein xl	370	370	0	30.82	0.022	T7	2
FUS:370:x:FUS:370	EFSGNPIKVSFATR-EFSGNPIKVSFATR-a8-b8	FUS	FUS	intra-protein xl	370	370	0	29.49	0	T4	2
FUS:370:x:FUS:370	EFSGNPIKVSFATR-EFSGNPIKVSFATR-a8-b8	FUS	FUS	intra-protein xl	370	370	0	28.01	0.036	T5	3
FUS:370:x:FUS:370	EFSGNPIKVSFATR-EFSGNPIKVSFATR-a8-b8	FUS	FUS	intra-protein xl	370	370	0	27.61	0.051	T8	2
FUS:370	EFSGNPIKVSFATR-K8-156	FUS	-	monolink	370		0	53.44	0	T1	3
FUS:370	EFSGNPIKVSFATR-K8-155	FUS	-	monolink	370		0	53.12	0	T8	3
FUS:370	EFSGNPIKVSFATR-K8-156	FUS	-	monolink	370		0	52.93	0	T10	3
FUS:370	EFSGNPIKVSFATR-K8-156	FUS	-	monolink	370		0	52.46	0	T7	3
FUS:370	EFSGNPIKVSFATR-K8-155	FUS	-	monolink	370		0	52.16	0	T6	3
FUS:370	EFSGNPIKVSFATR-K8-156	FUS	-	monolink	370		0	52.14	0	T2	3
FUS:370	EFSGNPIKVSFATR-K8-156	FUS	-	monolink	370		0	52.1	0	T9	3
FUS:370	EFSGNPIKVSFATR-K8-155	FUS	-	monolink	370		0	51.97	0	T11	3
FUS:370	EFSGNPIKVSFATR-K8-156	FUS	-	monolink	370		0	51.64	0	T5	3
FUS:370	EFSGNPIKVSFATR-K8-156	FUS	-	monolink	370		0	49.84	0	T4	3
FUS:370	AAIDWFDGKEFSGNPIKVSFATR-K17-156	FUS	-	monolink	370		0	49.38	0	T3	3
FUS:362:x:FUS:515	AAIDWFDGKEFSGNPIK-GGFGPGKMDSR-a9-b7	FUS	FUS	intra-protein xl	362	515	0.16	58.27	0	T5	3
FUS:362:x:FUS:515	AAIDWFDGKEFSGNPIK-GGFGPGKMDSR-a9-b7	FUS	FUS	intra-protein xl	362	515	0.14	55.02	0	T7	3
FUS:362:x:FUS:515	AAIDWFDGKEFSGNPIK-GGFGPGKMDSR-a9-b7	FUS	FUS	intra-protein xl	362	515	0	54.79	0	T9	3
FUS:362:x:FUS:515	AAIDWFDGKEFSGNPIK-GGFGPGKMDSR-a9-b7	FUS	FUS	intra-protein xl	362	515	0.4	54.01	0	T4	3
FUS:362:x:FUS:515	AAIDWFDGKEFSGNPIK-GGFGPGKMDSR-a9-b7	FUS	FUS	intra-protein xl	362	515	0.12	53.09	0	T6	3
FUS:362:x:FUS:515	AAIDWFDGKEFSGNPIK-GGFGPGKMDSR-a9-b7	FUS	FUS	intra-protein xl	362	515	0	52.25	0	T1	3
FUS:362:x:FUS:515	AAIDWFDGKEFSGNPIK-GGFGPGKMDSR-a9-b7	FUS	FUS	intra-protein xl	362	515	0.37	52.2	0	T8	3
FUS:362:x:FUS:515	AAIDWFDGKEFSGNPIK-GGFGPGKMDSR-a9-b7	FUS	FUS	intra-protein xl	362	515	0.39	51.94	0	T11	3
FUS:362:x:FUS:515	AAIDWFDGKEFSGNPIK-GGFGPGKMDSR-a9-b7	FUS	FUS	intra-protein xl	362	515	0.13	51.84	0	T3	3
FUS:362:x:FUS:515	AAIDWFDGKEFSGNPIK-GGFGPGKMDSR-a9-b7	FUS	FUS	intra-protein xl	362	515	0.14	50.47	0	T10	3
FUS:362:x:FUS:515	AAIDWFDGKEFSGNPIK-GGFGPGKMDSR-a9-b7	FUS	FUS	intra-protein xl	362	515	0.11	49.38	0	T2	3
FUS:362:x:FUS:456	APKPDGPGGGPGGSHMGGNYGDDR-AAIDWFDGKEFSGNPIK-a3-b9	FUS	FUS	intra-protein xl	456	362	0.23	42.42	0	T5	3
FUS:362:x:FUS:456	APKPDGPGGGPGGSHMGGNYGDDR-AAIDWFDGKEFSGNPIK-a3-b9	FUS	FUS	intra-protein xl	456	362	0.18	37.54	0	T7	3
FUS:362:x:FUS:456	APKPDGPGGGPGGSHMGGNYGDDR-AAIDWFDGKEFSGNPIK-a3-b9	FUS	FUS	intra-protein xl	456	362	0	37.38	0	T8	3
FUS:362:x:FUS:456	APKPDGPGGGPGGSHMGGNYGDDR-AAIDWFDGKEFSGNPIK-a3-b9	FUS	FUS	intra-protein xl	456	362	0.35	37.06	0	T11	3
FUS:362:x:FUS:456	APKPDGPGGGPGGSHMGGNYGDDR-AAIDWFDGKEFSGNPIK-a3-b9	FUS	FUS	intra-protein xl	456	362	0.24	35.83	0	T6	3
FUS:362:x:FUS:456	APKPDGPGGGPGGSHMGGNYGDDR-AAIDWFDGKEFSGNPIK-a3-b9	FUS	FUS	intra-protein xl	456	362	0	35.44	0	T4	3
FUS:362:x:FUS:456	APKPDGPGGGPGGSHMGGNYGDDR-AAIDWFDGKEFSGNPIK-a3-b9	FUS	FUS	intra-protein xl	456	362	0.29	35.05	0	T3	3
FUS:362:x:FUS:456	APKPDGPGGGPGGSHMGGNYGDDR-AAIDWFDGKEFSGNPIK-a3-b9	FUS	FUS	intra-protein xl	456	362	0	34.81	0.02	T9	3
FUS:362:x:FUS:456	APKPDGPGGGPGGSHMGGNYGDDR-AAIDWFDGKEFSGNPIK-a3-b9	FUS	FUS	intra-protein xl	456	362	0.34	33.01	0	T2	3
FUS:362:x:FUS:456	APKPDGPGGGPGGSHMGGNYGDDR-AAIDWFDGKEFSGNPIK-a3-b9	FUS	FUS	intra-protein xl	456	362	0.23	32.32	0	T1	3
FUS:362:x:FUS:456	APKPDGPGGGPGGSHMGGNYGDDR-AAIDWFDGKEFSGNPIK-a3-b9	FUS	FUS	intra-protein xl	456	362	0.28	31.74	0.029	T10	3
FUS:362:x:FUS:453	NECNQCKAPKPDGPGGGPGGSHMGGNYGDDR-AAIDWFDGKEFSGNPIK-a7-b9	FUS	FUS	intra-protein xl	453	362	0.85	37.97	0	T8	2
FUS:362:x:FUS:453	NECNQCKAPKPDGPGGGPGGSHMGGNYGDDR-AAIDWFDGKEFSGNPIK-a7-b9	FUS	FUS	intra-protein xl	453	362	0.92	35.24	0	T5	3
FUS:362:x:FUS:453	NECNQCKAPKPDGPGGGPGGSHMGGNYGDDR-AAIDWFDGKEFSGNPIK-a7-b9	FUS	FUS	intra-protein xl	453	362	0.76	34.98	0	T11	2
FUS:362:x:FUS:453	NECNQCKAPKPDGPGGGPGGSHMGGNYGDDR-AAIDWFDGKEFSGNPIK-a7-b9	FUS	FUS	intra-protein xl	453	362	0.8	32.68	0.034	T6	3
FUS:362:x:FUS:432	AGDWKCPNPTCENMNFSWR-AAIDWFDGKEFSGNPIK-a5-b9	FUS	FUS	intra-protein xl	432	362	0.61	46.39	0	T6	3
FUS:362:x:FUS:432	AGDWKCPNPTCENMNFSWR-AAIDWFDGKEFSGNPIK-a5-b9	FUS	FUS	intra-protein xl	432	362	0.42	46.22	0	T8	3
FUS:362:x:FUS:432	AGDWKCPNPTCENMNFSWR-AAIDWFDGKEFSGNPIK-a5-b9	FUS	FUS	intra-protein xl	432	362	0	45.51	0	T9	3
FUS:362:x:FUS:432	AGDWKCPNPTCENMNFSWR-AAIDWFDGKEFSGNPIK-a5-b9	FUS	FUS	intra-protein xl	432	362	0	44.36	0	T1	3
FUS:362:x:FUS:432	AGDWKCPNPTCENMNFSWR-AAIDWFDGKEFSGNPIK-a5-b9	FUS	FUS	intra-protein xl	432	362	0	43.12	0	T4	2
FUS:362:x:FUS:432	AGDWKCPNPTCENMNFSWR-AAIDWFDGKEFSGNPIK-a5-b9	FUS	FUS	intra-protein xl	432	362	0.56	42.15	0	T10	2
FUS:362:x:FUS:432	AGDWKCPNPTCENMNFSWR-AAIDWFDGKEFSGNPIK-a5-b9	FUS	FUS	intra-protein xl	432	362	0	41.55	0	T2	3
FUS:362:x:FUS:432	AGDWKCPNPTCENMNFSWR-AAIDWFDGKEFSGNPIK-a5-b9	FUS	FUS	intra-protein xl	432	362	0.51	40.98	0	T11	2
FUS:362:x:FUS:432	AGDWKCPNPTCENMNFSWR-AAIDWFDGKEFSGNPIK-a5-b9	FUS	FUS	intra-protein xl	432	362	0.6	40.88	0	T5	3
FUS:362:x:FUS:432	AGDWKCPNPTCENMNFSWR-AAIDWFDGKEFSGNPIK-a5-b9	FUS	FUS	intra-protein xl	432	362	0.55	40.13	0	T7	2
FUS:362:x:FUS:432	AGDWKCPNPTCENMNFSWR-AAIDWFDGKEFSGNPIK-a5-b9	FUS	FUS	intra-protein xl	432	362	0	34.59	0	T3	3
FUS:362:x:FUS:370	AAIDWFDGKEFSGNPIKVSFATR-K9-K17	FUS	-	looplink	362	370	0	38.71	0	T2	3
FUS:362:x:FUS:370	AAIDWFDGKEFSGNPIKVSFATR-K9-K17	FUS	-	looplink	362	370	0	36.9	0	T10	3
FUS:362:x:FUS:370	AAIDWFDGKEFSGNPIKVSFATR-K9-K17	FUS	-	looplink	362	370	0	36.63	0	T4	3
FUS:362:x:FUS:370	AAIDWFDGKEFSGNPIKVSFATR-K9-K17	FUS	-	looplink	362	370	0	36.47	0	T5	3
FUS:362:x:FUS:370	AAIDWFDGKEFSGNPIKVSFATR-K9-K17	FUS	-	looplink	362	370	0	36.47	0	T11	2
FUS:362:x:FUS:370	AAIDWFDGKEFSGNPIKVSFATR-K9-K17	FUS	-	looplink	362	370	0	35.97	0	T10	2
FUS:362:x:FUS:370	AAIDWFDGKEFSGNPIKVSFATR-K9-K17	FUS	-	looplink	362	370	0	35.49	0	T3	3
FUS:362:x:FUS:370	AAIDWFDGKEFSGNPIKVSFATR-K9-K17	FUS	-	looplink	362	370	0	34.87	0	T7	3
FUS:362:x:FUS:370	AAIDWFDGKEFSGNPIKVSFATR-K9-K17	FUS	-	looplink	362	370	0	34.57	0	T8	3
FUS:362:x:FUS:370	AAIDWFDGKEFSGNPIKVSFATR-K9-K17	FUS	-	looplink	362	370	0	33.02	0	T8	3
FUS:362:x:FUS:370	AAIDWFDGKEFSGNPIK-K9-K17	FUS	-	looplink	362	370	0.08	27.3	0	T1	3
FUS:362:x:FUS:370	AAIDWFDGKEFSGNPIKVSFATR-AAIDWFDGKEFSGNPIK-a17-b9	FUS	FUS	intra-protein xl	370	362	0	38.21	0	T11	3
FUS:362:x:FUS:370	AAIDWFDGKEFSGNPIK-EFSGNPIKVSFATR-a9-b8	FUS	FUS	intra-protein xl	362	370	0.5	38.08	0	T1	3
FUS:362:x:FUS:370	AAIDWFDGKEFSGNPIK-EFSGNPIKVSFATR-a9-b8	FUS	FUS	intra-protein xl	362	370	0.67	37.68	0.02	T9	3
FUS:362:x:FUS:370	AAIDWFDGKEFSGNPIK-EFSGNPIKVSFATR-a9-b8	FUS	FUS	intra-protein xl	362	370	0.75	34.65	0	T6	3
FUS:362:x:FUS:370	AAIDWFDGKEFSGNPIK-EFSGNPIKVSFATR-a9-b8	FUS	FUS	intra-protein xl	362	370	0.49	34.43	0	T9	3
FUS:362:x:FUS:370	AAIDWFDGKEFSGNPIK-EFSGNPIKVSFATR-a9-b8	FUS	FUS	intra-protein xl	362	370	0	31.87	0	T7	2
FUS:362:x:FUS:370	AAIDWFDGKEFSGNPIK-EFSGNPIKVSFATR-a9-b8	FUS	FUS	intra-protein xl	362	370	0.61	31.56	0	T6	3
FUS:362:x:FUS:370	AAIDWFDGKEFSGNPIK-EFSGNPIKVSFATR-a9-b8	FUS	FUS	intra-protein xl	362	370	0.54	31.41	0	T5	2
FUS:362:x:FUS:370	AAIDWFDGKEFSGNPIK-EFSGNPIKVSFATR-a9-b8	FUS	FUS	intra-protein xl	362	370	0.58	31.1	0	T4	3
FUS:362:x:FUS:370	AAIDWFDGKEFSGNPIK-EFSGNPIKVSFATR-a9-b8	FUS	FUS	intra-protein xl	362	370	0.55	30.34	0	T3	3
FUS:362:x:FUS:370	AAIDWFDGKEFSGNPIK-EFSGNPIKVSFATR-a9-b8	FUS	FUS	intra-protein xl	362	370	0.65	29.91	0	T2	3
FUS:362:x:FUS:362	AAIDWFDGKEFSGNPIK-AAIDWFDGKEFSGNPIK-a9-b9	FUS	FUS	intra-protein xl	362	362	0	47.15	0	T4	2
FUS:362:x:FUS:362	AAIDWFDGKEFSGNPIK-AAIDWFDGKEFSGNPIK-a9-b9	FUS	FUS	intra-protein xl	362	362	0	45.58	0	T5	3
FUS:362:x:FUS:362	AAIDWFDGKEFSGNPIK-AAIDWFDGKEFSGNPIK-a9-b9	FUS	FUS	intra-protein xl	362	362	0	45.54	0	T7	3
FUS:362:x:FUS:362	AAIDWFDGKEFSGNPIK-AAIDWFDGKEFSGNPIK-a9-b9	FUS	FUS	intra-protein xl	362	362	0	45.43	0	T10	3
FUS:362:x:FUS:362	AAIDWFDGKEFSGNPIK-AAIDWFDGKEFSGNPIK-a9-b9	FUS	FUS	intra-protein xl	362	362	0	45.36	0	T2	3
FUS:362:x:FUS:362	AAIDWFDGKEFSGNPIK-AAIDWFDGKEFSGNPIK-a9-b9	FUS	FUS	intra-protein xl	362	362	0	44.86	0	T9	2
FUS:362:x:FUS:362	AAIDWFDGKEFSGNPIK-AAIDWFDGKEFSGNPIK-a9-b9	FUS	FUS	intra-protein xl	362	362	0.77	44.12	0	T8	3
FUS:362:x:FUS:362	AAIDWFDGKEFSGNPIK-AAIDWFDGKEFSGNPIK-a9-b9	FUS	FUS	intra-protein xl	362	362	0	43.99	0	T1	3
FUS:362:x:FUS:362	AAIDWFDGKEFSGNPIK-AAIDWFDGKEFSGNPIK-a9-b9	FUS	FUS	intra-protein xl	362	362	0.69	42.19	0	T6	3
FUS:362:x:FUS:362	AAIDWFDGKEFSGNPIK-AAIDWFDGKEFSGNPIK-a9-b9	FUS	FUS	intra-protein xl	362	362	0	41.82	0	T11	3
FUS:362:x:FUS:362	AAIDWFDGKEFSGNPIK-AAIDWFDGKEFSGNPIK-a9-b9	FUS	FUS	intra-protein xl	362	362	0	37.78	0	T3	3
FUS:362	AAIDWFDGKEFSGNPIK-K9-155	FUS	-	monolink	362		0.09	53.85	0	T3	3
FUS:362	AAIDWFDGKEFSGNPIK-K9-155	FUS	-	monolink	362		0.11	53.26	0	T4	3
FUS:362	AAIDWFDGKEFSGNPIK-K9-155	FUS	-	monolink	362		0.09	52.69	0	T5	3
FUS:362	AAIDWFDGKEFSGNPIK-K9-155	FUS	-	monolink	362		0.08	52.39	0	T2	3
FUS:362	AAIDWFDGKEFSGNPIK-K9-155	FUS	-	monolink	362		0.1	52.39	0	T6	3
FUS:362	AAIDWFDGKEFSGNPIK-K9-155	FUS	-	monolink	362		0	52.32	0	T1	3
FUS:362	AAIDWFDGKEFSGNPIK-K9-155	FUS	-	monolink	362		0.13	52.23	0	T8	3
FUS:362	AAIDWFDGKEFSGNPIK-K9-155	FUS	-	monolink	362		0.2	51.67	0	T10	3
FUS:362	AAIDWFDGKEFSGNPIK-K9-155	FUS	-	monolink	362		0.16	51.44	0	T11	3
FUS:362	AAIDWFDGKEFSGNPIK-K9-155	FUS	-	monolink	362		0.16	51	0	T9	3
FUS:362	AAIDWFDGKEFSGNPIK-K9-155	FUS	-	monolink	362		0	50.71	0	T7	3
FUS:353	LKGEATVSFDDPPSAKAAIDWFDGK-K16-155	FUS	-	monolink	353		0.06	40.4	0	T9	3
FUS:353	GEATVSFDDPPSAKAAIDWFDGK-K14-155	FUS	-	monolink	353		0	39.47	0	T11	3
FUS:353	GEATVSFDDPPSAKAAIDWFDGK-K14-155	FUS	-	monolink	353		0.3	39.1	0	T6	3
FUS:353	LKGEATVSFDDPPSAKAAIDWFDGK-K16-155	FUS	-	monolink	353		0.04	38.65	0	T7	3
FUS:353	LKGEATVSFDDPPSAKAAIDWFDGK-K16-155	FUS	-	monolink	353		0	38.26	0	T5	3
FUS:353	LKGEATVSFDDPPSAKAAIDWFDGK-K16-155	FUS	-	monolink	353		0.02	37.88	0	T8	3
FUS:353	LKGEATVSFDDPPSAKAAIDWFDGK-K16-155	FUS	-	monolink	353		0.1	35.18	0	T3	3
FUS:353	GEATVSFDDPPSAKAAIDWFDGK-K14-155	FUS	-	monolink	353		0.08	34.83	0	T10	3
FUS:353	LKGEATVSFDDPPSAKAAIDWFDGK-K16-155	FUS	-	monolink	353		0.05	33.83	0	T4	2
FUS:353	LKGEATVSFDDPPSAKAAIDWFDGK-K16-155	FUS	-	monolink	353		0.03	32.34	0	T2	3
FUS:353	GEATVSFDDPPSAKAAIDWFDGK-K14-155	FUS	-	monolink	353		0	28.9	0	T1	3
FUS:339:x:FUS:515	LKGEATVSFDDPPSAK-GGFGPGKMDSR-a2-b7	FUS	FUS	intra-protein xl	339	515	0.33	44.52	0	T1	3
FUS:339:x:FUS:515	LKGEATVSFDDPPSAK-GGFGPGKMDSR-a2-b7	FUS	FUS	intra-protein xl	339	515	0.31	43.35	0	T2	3
FUS:339:x:FUS:515	LKGEATVSFDDPPSAK-GGFGPGKMDSR-a2-b7	FUS	FUS	intra-protein xl	339	515	0.43	43.22	0	T6	3
FUS:339:x:FUS:515	LKGEATVSFDDPPSAK-GGFGPGKMDSR-a2-b7	FUS	FUS	intra-protein xl	339	515	0.39	42.7	0	T3	3
FUS:339:x:FUS:515	LKGEATVSFDDPPSAK-GGFGPGKMDSR-a2-b7	FUS	FUS	intra-protein xl	339	515	0.66	41.79	0	T9	3
FUS:339:x:FUS:515	LKGEATVSFDDPPSAK-GGFGPGKMDSR-a2-b7	FUS	FUS	intra-protein xl	339	515	0.54	41.4	0	T5	3
FUS:339:x:FUS:515	LKGEATVSFDDPPSAK-GGFGPGKMDSR-a2-b7	FUS	FUS	intra-protein xl	339	515	0.41	40.51	0.029	T10	3
FUS:339:x:FUS:515	LKGEATVSFDDPPSAK-GGFGPGKMDSR-a2-b7	FUS	FUS	intra-protein xl	339	515	0.37	39.91	0	T4	3
FUS:339:x:FUS:515	LKGEATVSFDDPPSAK-GGFGPGKMDSR-a2-b7	FUS	FUS	intra-protein xl	339	515	0.27	39.74	0	T7	3
FUS:339:x:FUS:515	LKGEATVSFDDPPSAK-GGFGPGKMDSR-a2-b7	FUS	FUS	intra-protein xl	339	515	0.45	38.91	0	T11	3
FUS:339:x:FUS:515	LKGEATVSFDDPPSAK-GGFGPGKMDSR-a2-b7	FUS	FUS	intra-protein xl	339	515	0.36	37.44	0.019	T8	3
FUS:339:x:FUS:456	APKPDGPGGGPGGSHMGGNYGDDR-LKGEATVSFDDPPSAK-a3-b2	FUS	FUS	intra-protein xl	456	339	0.38	38.22	0	T8	3
FUS:339:x:FUS:456	NECNQCKAPKPDGPGGGPGGSHMGGNYGDDR-LKGEATVSFDDPPSAK-a10-b2	FUS	FUS	intra-protein xl	456	339	0	37.65	0	T3	3
FUS:339:x:FUS:456	APKPDGPGGGPGGSHMGGNYGDDR-LKGEATVSFDDPPSAK-a3-b2	FUS	FUS	intra-protein xl	456	339	0.3	37.58	0	T4	3
FUS:339:x:FUS:456	NECNQCKAPKPDGPGGGPGGSHMGGNYGDDR-LKGEATVSFDDPPSAK-a10-b2	FUS	FUS	intra-protein xl	456	339	0.82	37.32	0.02	T2	3
FUS:339:x:FUS:456	APKPDGPGGGPGGSHMGGNYGDDR-LKGEATVSFDDPPSAK-a3-b2	FUS	FUS	intra-protein xl	456	339	0.35	36.33	0	T5	3
FUS:339:x:FUS:456	APKPDGPGGGPGGSHMGGNYGDDR-LKGEATVSFDDPPSAK-a3-b2	FUS	FUS	intra-protein xl	456	339	0	36.06	0	T9	3
FUS:339:x:FUS:456	APKPDGPGGGPGGSHMGGNYGDDR-LKGEATVSFDDPPSAK-a3-b2	FUS	FUS	intra-protein xl	456	339	0.32	35.62	0.034	T6	3
FUS:339:x:FUS:456	APKPDGPGGGPGGSHMGGNYGDDR-LKGEATVSFDDPPSAK-a3-b2	FUS	FUS	intra-protein xl	456	339	0.35	34.56	0	T1	3
FUS:339:x:FUS:456	APKPDGPGGGPGGSHMGGNYGDDR-LKGEATVSFDDPPSAK-a3-b2	FUS	FUS	intra-protein xl	456	339	0	33.63	0	T11	3
FUS:339:x:FUS:456	APKPDGPGGGPGGSHMGGNYGDDR-LKGEATVSFDDPPSAK-a3-b2	FUS	FUS	intra-protein xl	456	339	0.39	32.6	0	T7	3
FUS:339:x:FUS:456	APKPDGPGGGPGGSHMGGNYGDDR-LKGEATVSFDDPPSAK-a3-b2	FUS	FUS	intra-protein xl	456	339	0	32.39	0.029	T10	3
FUS:339:x:FUS:453	NECNQCKAPKPDGPGGGPGGSHMGGNYGDDR-LKGEATVSFDDPPSAK-a7-b2	FUS	FUS	intra-protein xl	453	339	0.42	46.86	0	T1	2
FUS:339:x:FUS:453	NECNQCKAPKPDGPGGGPGGSHMGGNYGDDR-LKGEATVSFDDPPSAK-a7-b2	FUS	FUS	intra-protein xl	453	339	0.69	39.11	0	T6	3
FUS:339:x:FUS:453	NECNQCKAPKPDGPGGGPGGSHMGGNYGDDR-LKGEATVSFDDPPSAK-a7-b2	FUS	FUS	intra-protein xl	453	339	0	38.51	0	T2	3
FUS:339:x:FUS:453	NECNQCKAPKPDGPGGGPGGSHMGGNYGDDR-LKGEATVSFDDPPSAK-a7-b2	FUS	FUS	intra-protein xl	453	339	0.73	36.84	0	T9	3
FUS:339:x:FUS:453	NECNQCKAPKPDGPGGGPGGSHMGGNYGDDR-LKGEATVSFDDPPSAK-a7-b2	FUS	FUS	intra-protein xl	453	339	0.75	35.26	0	T5	3
FUS:339:x:FUS:453	NECNQCKAPKPDGPGGGPGGSHMGGNYGDDR-LKGEATVSFDDPPSAK-a7-b2	FUS	FUS	intra-protein xl	453	339	0.79	34.4	0.019	T8	3
FUS:339:x:FUS:453	NECNQCKAPKPDGPGGGPGGSHMGGNYGDDR-LKGEATVSFDDPPSAK-a7-b2	FUS	FUS	intra-protein xl	453	339	0.77	33.73	0.029	T10	3
FUS:339:x:FUS:453	NECNQCKAPKPDGPGGGPGGSHMGGNYGDDR-LKGEATVSFDDPPSAK-a7-b2	FUS	FUS	intra-protein xl	453	339	0.84	32.56	0	T4	3
FUS:339:x:FUS:453	NECNQCKAPKPDGPGGGPGGSHMGGNYGDDR-LKGEATVSFDDPPSAK-a7-b2	FUS	FUS	intra-protein xl	453	339	0.29	32.35	0	T11	3
FUS:339:x:FUS:453	NECNQCKAPKPDGPGGGPGGSHMGGNYGDDR-LKGEATVSFDDPPSAK-a7-b2	FUS	FUS	intra-protein xl	453	339	0	32.27	0	T3	3
FUS:339:x:FUS:453	NECNQCKAPKPDGPGGGPGGSHMGGNYGDDR-LKGEATVSFDDPPSAK-a7-b2	FUS	FUS	intra-protein xl	453	339	0.76	31.68	0	T7	3
FUS:339:x:FUS:432	AGDWKCPNPTCENMNFSWR-LKGEATVSFDDPPSAK-a5-b2	FUS	FUS	intra-protein xl	432	339	0.65	38.15	0	T2	3
FUS:339:x:FUS:432	AGDWKCPNPTCENMNFSWR-LKGEATVSFDDPPSAK-a5-b2	FUS	FUS	intra-protein xl	432	339	0	37.73	0	T4	2
FUS:339:x:FUS:432	AGDWKCPNPTCENMNFSWR-LKGEATVSFDDPPSAK-a5-b2	FUS	FUS	intra-protein xl	432	339	0.44	36.84	0	T5	3
FUS:339:x:FUS:432	AGDWKCPNPTCENMNFSWR-LKGEATVSFDDPPSAK-a5-b2	FUS	FUS	intra-protein xl	432	339	0	36.45	0	T6	3
FUS:339:x:FUS:432	AGDWKCPNPTCENMNFSWR-LKGEATVSFDDPPSAK-a5-b2	FUS	FUS	intra-protein xl	432	339	0.54	36.35	0	T11	3
FUS:339:x:FUS:432	AGDWKCPNPTCENMNFSWR-LKGEATVSFDDPPSAK-a5-b2	FUS	FUS	intra-protein xl	432	339	0.46	36.06	0	T1	3
FUS:339:x:FUS:432	AGDWKCPNPTCENMNFSWR-LKGEATVSFDDPPSAK-a5-b2	FUS	FUS	intra-protein xl	432	339	0	36.05	0.029	T10	3
FUS:339:x:FUS:432	AGDWKCPNPTCENMNFSWR-LKGEATVSFDDPPSAK-a5-b2	FUS	FUS	intra-protein xl	432	339	0	34.91	0	T9	3
FUS:339:x:FUS:432	AGDWKCPNPTCENMNFSWR-LKGEATVSFDDPPSAK-a5-b2	FUS	FUS	intra-protein xl	432	339	0.45	34.1	0	T8	3
FUS:339:x:FUS:432	AGDWKCPNPTCENMNFSWR-LKGEATVSFDDPPSAK-a5-b2	FUS	FUS	intra-protein xl	432	339	0	33.82	0	T3	3
FUS:339:x:FUS:432	AGDWKCPNPTCENMNFSWR-LKGEATVSFDDPPSAK-a5-b2	FUS	FUS	intra-protein xl	432	339	0.59	29.92	0.022	T7	2
FUS:339:x:FUS:370	AAIDWFDGKEFSGNPIKVSFATR-LKGEATVSFDDPPSAK-a17-b2	FUS	FUS	intra-protein xl	370	339	0.37	43.93	0	T3	3
FUS:339:x:FUS:370	AAIDWFDGKEFSGNPIKVSFATR-LKGEATVSFDDPPSAK-a17-b2	FUS	FUS	intra-protein xl	370	339	0.36	42.6	0	T1	3
FUS:339:x:FUS:370	LKGEATVSFDDPPSAK-EFSGNPIKVSFATR-a2-b8	FUS	FUS	intra-protein xl	339	370	0.48	42.17	0	T11	3
FUS:339:x:FUS:370	AAIDWFDGKEFSGNPIKVSFATR-LKGEATVSFDDPPSAK-a17-b2	FUS	FUS	intra-protein xl	370	339	0.45	39.05	0.02	T2	3
FUS:339:x:FUS:370	LKGEATVSFDDPPSAK-EFSGNPIKVSFATR-a2-b8	FUS	FUS	intra-protein xl	339	370	0	38.42	0	T8	3
FUS:339:x:FUS:370	LKGEATVSFDDPPSAK-EFSGNPIKVSFATR-a2-b8	FUS	FUS	intra-protein xl	339	370	0	38.14	0	T5	3
FUS:339:x:FUS:370	AAIDWFDGKEFSGNPIKVSFATR-LKGEATVSFDDPPSAK-a17-b2	FUS	FUS	intra-protein xl	370	339	0.59	38.14	0	T6	3
FUS:339:x:FUS:370	LKGEATVSFDDPPSAK-EFSGNPIKVSFATR-a2-b8	FUS	FUS	intra-protein xl	339	370	0.5	37.26	0	T10	3
FUS:339:x:FUS:370	LKGEATVSFDDPPSAK-EFSGNPIKVSFATR-a2-b8	FUS	FUS	intra-protein xl	339	370	0	36.89	0	T4	3
FUS:339:x:FUS:370	LKGEATVSFDDPPSAK-EFSGNPIKVSFATR-a2-b8	FUS	FUS	intra-protein xl	339	370	0	36.78	0	T7	3
FUS:339:x:FUS:370	LKGEATVSFDDPPSAK-EFSGNPIKVSFATR-a2-b8	FUS	FUS	intra-protein xl	339	370	0.49	36.67	0.02	T9	3
FUS:339:x:FUS:362	AAIDWFDGKEFSGNPIK-LKGEATVSFDDPPSAK-a9-b2	FUS	FUS	intra-protein xl	362	339	0.53	46.69	0	T3	3
FUS:339:x:FUS:362	AAIDWFDGKEFSGNPIK-LKGEATVSFDDPPSAK-a9-b2	FUS	FUS	intra-protein xl	362	339	0.55	46.6	0	T6	3
FUS:339:x:FUS:362	AAIDWFDGKEFSGNPIK-LKGEATVSFDDPPSAK-a9-b2	FUS	FUS	intra-protein xl	362	339	0.49	46.59	0	T2	3
FUS:339:x:FUS:362	AAIDWFDGKEFSGNPIK-LKGEATVSFDDPPSAK-a9-b2	FUS	FUS	intra-protein xl	362	339	0.53	46.15	0	T1	3
FUS:339:x:FUS:362	AAIDWFDGKEFSGNPIK-LKGEATVSFDDPPSAK-a9-b2	FUS	FUS	intra-protein xl	362	339	0.48	45.78	0	T9	3
FUS:339:x:FUS:362	AAIDWFDGKEFSGNPIK-LKGEATVSFDDPPSAK-a9-b2	FUS	FUS	intra-protein xl	362	339	0.52	45.42	0	T10	3
FUS:339:x:FUS:362	AAIDWFDGKEFSGNPIK-LKGEATVSFDDPPSAK-a9-b2	FUS	FUS	intra-protein xl	362	339	0.54	42.65	0	T5	3
FUS:339:x:FUS:362	AAIDWFDGKEFSGNPIK-LKGEATVSFDDPPSAK-a9-b2	FUS	FUS	intra-protein xl	362	339	0	42.53	0	T4	3
FUS:339:x:FUS:362	AAIDWFDGKEFSGNPIK-LKGEATVSFDDPPSAK-a9-b2	FUS	FUS	intra-protein xl	362	339	0.55	41.96	0	T8	3
FUS:339:x:FUS:362	AAIDWFDGKEFSGNPIK-LKGEATVSFDDPPSAK-a9-b2	FUS	FUS	intra-protein xl	362	339	0	41.39	0	T11	3
FUS:339:x:FUS:362	AAIDWFDGKEFSGNPIK-LKGEATVSFDDPPSAK-a9-b2	FUS	FUS	intra-protein xl	362	339	0.57	40.73	0	T7	3
FUS:339	LKGEATVSFDDPPSAK-K2-156	FUS	-	monolink	339		0.13	47.07	0	T5	3
FUS:339	LKGEATVSFDDPPSAK-K2-155	FUS	-	monolink	339		0.12	46.42	0	T8	3
FUS:339	LKGEATVSFDDPPSAK-K2-155	FUS	-	monolink	339		0.11	45.84	0	T1	3
FUS:339	LKGEATVSFDDPPSAK-K2-155	FUS	-	monolink	339		0.1	45.82	0	T9	3
FUS:339	LKGEATVSFDDPPSAK-K2-156	FUS	-	monolink	339		0.21	45.6	0	T6	3
FUS:339	LKGEATVSFDDPPSAK-K2-156	FUS	-	monolink	339		0.14	45.37	0	T10	3
FUS:339	LKGEATVSFDDPPSAK-K2-156	FUS	-	monolink	339		0.12	45.13	0	T7	3
FUS:339	LKGEATVSFDDPPSAK-K2-156	FUS	-	monolink	339		0.1	44.79	0	T11	3
FUS:339	LKGEATVSFDDPPSAK-K2-156	FUS	-	monolink	339		0.17	44.4	0	T4	3
FUS:339	LKGEATVSFDDPPSAK-K2-156	FUS	-	monolink	339		0.13	43.43	0	T3	3
FUS:339	LKGEATVSFDDPPSAK-K2-156	FUS	-	monolink	339		0.21	43.4	0	T2	3
FUS:337:x:FUS:515	ETGKLKGEATVSFDDPPSAK-GGFGPGKMDSR-a4-b7	FUS	FUS	intra-protein xl	337	515	0	36.37	0	T11	2
FUS:337:x:FUS:515	GGFGPGKMDSR-ETGKLK-a7-b4	FUS	FUS	intra-protein xl	515	337	0.38	35.99	0	T6	2
FUS:337:x:FUS:515	ETGKLKGEATVSFDDPPSAK-GGFGPGKMDSR-a4-b7	FUS	FUS	intra-protein xl	337	515	0	35.83	0	T4	3
FUS:337:x:FUS:515	GGFGPGKMDSR-ETGKLK-a7-b4	FUS	FUS	intra-protein xl	515	337	0.37	34.79	0	T1	2
FUS:337:x:FUS:515	ETGKLKGEATVSFDDPPSAK-GGFGPGKMDSR-a4-b7	FUS	FUS	intra-protein xl	337	515	0	34.59	0.019	T8	2
FUS:337:x:FUS:515	GGFGPGKMDSR-ETGKLK-a7-b4	FUS	FUS	intra-protein xl	515	337	0	33.54	0	T2	3
FUS:337:x:FUS:515	GGFGPGKMDSR-ETGKLK-a7-b4	FUS	FUS	intra-protein xl	515	337	0.76	33.11	0	T5	3
FUS:337:x:FUS:515	ETGKLKGEATVSFDDPPSAK-GGFGPGKMDSR-a4-b7	FUS	FUS	intra-protein xl	337	515	0	32.88	0	T3	3
FUS:337:x:FUS:515	GGFGPGKMDSR-ETGKLK-a7-b4	FUS	FUS	intra-protein xl	515	337	0.53	31.53	0.02	T9	2
FUS:337:x:FUS:456	APKPDGPGGGPGGSHMGGNYGDDR-ETGKLK-a3-b4	FUS	FUS	intra-protein xl	456	337	0.14	30.55	0	T5	3
FUS:337:x:FUS:456	APKPDGPGGGPGGSHMGGNYGDDR-ETGKLK-a3-b4	FUS	FUS	intra-protein xl	456	337	0.21	27.39	0	T1	2
FUS:337:x:FUS:456	APKPDGPGGGPGGSHMGGNYGDDR-ETGKLK-a3-b4	FUS	FUS	intra-protein xl	456	337	0	27.03	0.051	T8	2
FUS:337:x:FUS:456	APKPDGPGGGPGGSHMGGNYGDDR-ETGKLK-a3-b4	FUS	FUS	intra-protein xl	456	337	0.15	26.86	0	T9	2
FUS:337:x:FUS:432	AGDWKCPNPTCENMNFSWR-ETGKLK-a5-b4	FUS	FUS	intra-protein xl	432	337	0	36.19	0	T6	3
FUS:337:x:FUS:432	AGDWKCPNPTCENMNFSWR-ETGKLK-a5-b4	FUS	FUS	intra-protein xl	432	337	0.19	32.2	0	T4	2
FUS:337:x:FUS:370	EFSGNPIKVSFATR-ETGKLK-a8-b4	FUS	FUS	intra-protein xl	370	337	0.25	38.32	0.019	T8	3
FUS:337:x:FUS:370	EFSGNPIKVSFATR-ETGKLK-a8-b4	FUS	FUS	intra-protein xl	370	337	0.16	37.34	0	T9	3
FUS:337:x:FUS:370	EFSGNPIKVSFATR-ETGKLK-a8-b4	FUS	FUS	intra-protein xl	370	337	0.27	37.09	0	T2	3
FUS:337:x:FUS:370	EFSGNPIKVSFATR-ETGKLK-a8-b4	FUS	FUS	intra-protein xl	370	337	0	35.97	0	T6	3
FUS:337:x:FUS:370	EFSGNPIKVSFATR-ETGKLK-a8-b4	FUS	FUS	intra-protein xl	370	337	0.22	35.47	0	T11	3
FUS:337:x:FUS:370	ETGKLKGEATVSFDDPPSAK-EFSGNPIKVSFATR-a4-b8	FUS	FUS	intra-protein xl	337	370	0.18	35.32	0	T3	3
FUS:337:x:FUS:370	EFSGNPIKVSFATR-ETGKLK-a8-b4	FUS	FUS	intra-protein xl	370	337	0.19	34.01	0.018	T4	3
FUS:337:x:FUS:370	EFSGNPIKVSFATR-ETGKLK-a8-b4	FUS	FUS	intra-protein xl	370	337	0.22	34.01	0.021	T5	3
FUS:337:x:FUS:370	EFSGNPIKVSFATR-ETGKLK-a8-b4	FUS	FUS	intra-protein xl	370	337	0	33.93	0	T7	3
FUS:337:x:FUS:370	EFSGNPIKVSFATR-ETGKLK-a8-b4	FUS	FUS	intra-protein xl	370	337	0.25	33	0	T1	3
FUS:337:x:FUS:370	EFSGNPIKVSFATR-ETGKLK-a8-b4	FUS	FUS	intra-protein xl	370	337	0.22	30.98	0.029	T10	3
FUS:337:x:FUS:362	ETGKLKGEATVSFDDPPSAK-AAIDWFDGKEFSGNPIK-a4-b9	FUS	FUS	intra-protein xl	337	362	0	38.42	0	T4	3
FUS:337:x:FUS:362	AAIDWFDGKEFSGNPIK-ETGKLK-a9-b4	FUS	FUS	intra-protein xl	362	337	0.36	35.22	0	T11	3
FUS:337:x:FUS:362	AAIDWFDGKEFSGNPIK-ETGKLK-a9-b4	FUS	FUS	intra-protein xl	362	337	0.31	34.18	0	T3	3
FUS:337:x:FUS:362	AAIDWFDGKEFSGNPIK-ETGKLK-a9-b4	FUS	FUS	intra-protein xl	362	337	0.22	33.16	0.034	T6	3
FUS:337:x:FUS:362	AAIDWFDGKEFSGNPIK-ETGKLK-a9-b4	FUS	FUS	intra-protein xl	362	337	0.22	33.14	0.02	T9	2
FUS:337:x:FUS:362	AAIDWFDGKEFSGNPIK-ETGKLK-a9-b4	FUS	FUS	intra-protein xl	362	337	0.35	32.91	0	T8	3
FUS:337:x:FUS:362	AAIDWFDGKEFSGNPIK-ETGKLK-a9-b4	FUS	FUS	intra-protein xl	362	337	0.36	32.72	0	T7	3
FUS:337:x:FUS:362	AAIDWFDGKEFSGNPIK-ETGKLK-a9-b4	FUS	FUS	intra-protein xl	362	337	0.31	31.88	0	T2	3
FUS:337:x:FUS:362	AAIDWFDGKEFSGNPIK-ETGKLK-a9-b4	FUS	FUS	intra-protein xl	362	337	0.28	31.58	0	T5	3
FUS:337:x:FUS:339	ETGKLKGEATVSFDDPPSAK-K4-K6	FUS	-	looplink	337	339	0	43.99	0	T11	3
FUS:337:x:FUS:339	ETGKLKGEATVSFDDPPSAK-K4-K6	FUS	-	looplink	337	339	0	42.48	0	T8	3
FUS:337:x:FUS:339	ETGKLKGEATVSFDDPPSAK-K4-K6	FUS	-	looplink	337	339	0	42.2	0	T9	3
FUS:337:x:FUS:339	ETGKLKGEATVSFDDPPSAK-K4-K6	FUS	-	looplink	337	339	0	41.83	0	T10	3
FUS:337:x:FUS:339	ETGKLKGEATVSFDDPPSAK-K4-K6	FUS	-	looplink	337	339	0	41.43	0	T7	3
FUS:337:x:FUS:339	ETGKLKGEATVSFDDPPSAK-K4-K6	FUS	-	looplink	337	339	0	41.41	0	T4	3
FUS:337:x:FUS:339	ETGKLKGEATVSFDDPPSAK-K4-K6	FUS	-	looplink	337	339	0	41.27	0	T6	3
FUS:337:x:FUS:339	ETGKLKGEATVSFDDPPSAK-K4-K6	FUS	-	looplink	337	339	0	40.62	0	T1	3
FUS:337:x:FUS:339	ETGKLKGEATVSFDDPPSAK-K4-K6	FUS	-	looplink	337	339	0	40.3	0	T5	3
FUS:337:x:FUS:339	ETGKLKGEATVSFDDPPSAK-K4-K6	FUS	-	looplink	337	339	0	40.22	0	T3	3
FUS:337:x:FUS:339	ETGKLKGEATVSFDDPPSAK-K4-K6	FUS	-	looplink	337	339	0	40.03	0	T2	3
FUS:337:x:FUS:339	LKGEATVSFDDPPSAK-ETGKLK-a2-b4	FUS	FUS	intra-protein xl	339	337	0.43	35.09	0	T10	2
FUS:337:x:FUS:339	LKGEATVSFDDPPSAK-ETGKLK-a2-b4	FUS	FUS	intra-protein xl	339	337	0.38	34.62	0	T9	3
FUS:337:x:FUS:339	LKGEATVSFDDPPSAK-ETGKLK-a2-b4	FUS	FUS	intra-protein xl	339	337	0.29	34.1	0	T8	3
FUS:337:x:FUS:339	LKGEATVSFDDPPSAK-ETGKLK-a2-b4	FUS	FUS	intra-protein xl	339	337	0.43	33.93	0	T7	2
FUS:337:x:FUS:339	LKGEATVSFDDPPSAK-ETGKLK-a2-b4	FUS	FUS	intra-protein xl	339	337	0.36	33.69	0	T6	2
FUS:337:x:FUS:339	LKGEATVSFDDPPSAK-ETGKLK-a2-b4	FUS	FUS	intra-protein xl	339	337	0.57	33.06	0	T5	2
FUS:337:x:FUS:339	LKGEATVSFDDPPSAK-ETGKLK-a2-b4	FUS	FUS	intra-protein xl	339	337	0.23	32.77	0	T4	3
FUS:337:x:FUS:339	LKGEATVSFDDPPSAK-ETGKLK-a2-b4	FUS	FUS	intra-protein xl	339	337	0.39	32.37	0	T3	3
FUS:337:x:FUS:339	LKGEATVSFDDPPSAK-ETGKLK-a2-b4	FUS	FUS	intra-protein xl	339	337	0.36	28.92	0	T2	3
FUS:337:x:FUS:339	LKGEATVSFDDPPSAK-ETGKLK-a2-b4	FUS	FUS	intra-protein xl	339	337	0.28	28.74	0	T1	3
FUS:337	ETGKLKGEATVSFDDPPSAK-K4-156	FUS	-	monolink	337		0	43.09	0	T3	3
FUS:337	ETGKLKGEATVSFDDPPSAK-K4-155	FUS	-	monolink	337		0	41.88	0	T5	3
FUS:337	ETGKLKGEATVSFDDPPSAK-K4-155	FUS	-	monolink	337		0	41.74	0	T8	3
FUS:337	ETGKLKGEATVSFDDPPSAK-K4-156	FUS	-	monolink	337		0	41.72	0	T10	3
FUS:337	ETGKLKGEATVSFDDPPSAK-K4-156	FUS	-	monolink	337		0	41.64	0	T1	3
FUS:337	ETGKLKGEATVSFDDPPSAK-K4-156	FUS	-	monolink	337		0	41.64	0	T2	3
FUS:337	ETGKLKGEATVSFDDPPSAK-K4-156	FUS	-	monolink	337		0	41.39	0	T6	3
FUS:337	ETGKLKGEATVSFDDPPSAK-K4-155	FUS	-	monolink	337		0	41.35	0	T11	3
FUS:337	ETGKLKGEATVSFDDPPSAK-K4-155	FUS	-	monolink	337		0	41.18	0	T4	3
FUS:337	ETGKLKGEATVSFDDPPSAK-K4-156	FUS	-	monolink	337		0	41.11	0	T9	3
FUS:337	ETGKLKGEATVSFDDPPSAK-K4-155	FUS	-	monolink	337		0	40.72	0	T7	3
FUS:321:x:FUS:515	KTGQPMINLYTDR-GGFGPGKMDSR-a1-b7	FUS	FUS	intra-protein xl	321	515	0	39.03	0	T3	3
FUS:321:x:FUS:515	KTGQPMINLYTDR-GGFGPGKMDSR-a1-b7	FUS	FUS	intra-protein xl	321	515	0	38.93	0	T1	3
FUS:321:x:FUS:515	KTGQPMINLYTDR-GGFGPGKMDSR-a1-b7	FUS	FUS	intra-protein xl	321	515	0	38.82	0	T5	3
FUS:321:x:FUS:515	KTGQPMINLYTDR-GGFGPGKMDSR-a1-b7	FUS	FUS	intra-protein xl	321	515	0	38.63	0	T11	3
FUS:321:x:FUS:515	KTGQPMINLYTDR-GGFGPGKMDSR-a1-b7	FUS	FUS	intra-protein xl	321	515	0	38.34	0	T8	3
FUS:321:x:FUS:515	KTGQPMINLYTDR-GGFGPGKMDSR-a1-b7	FUS	FUS	intra-protein xl	321	515	0.78	37.69	0	T7	3
FUS:321:x:FUS:515	KTGQPMINLYTDR-GGFGPGKMDSR-a1-b7	FUS	FUS	intra-protein xl	321	515	0	37.3	0.029	T10	3
FUS:321:x:FUS:515	KTGQPMINLYTDR-GGFGPGKMDSR-a1-b7	FUS	FUS	intra-protein xl	321	515	0	36.87	0.02	T9	3
FUS:321:x:FUS:515	KTGQPMINLYTDR-GGFGPGKMDSR-a1-b7	FUS	FUS	intra-protein xl	321	515	0.75	36.25	0.034	T6	3
FUS:321:x:FUS:515	KTGQPMINLYTDR-GGFGPGKMDSR-a1-b7	FUS	FUS	intra-protein xl	321	515	0	36.13	0	T4	3
FUS:321:x:FUS:515	KTGQPMINLYTDR-GGFGPGKMDSR-a1-b7	FUS	FUS	intra-protein xl	321	515	0	35.69	0.02	T2	3
FUS:321:x:FUS:456	APKPDGPGGGPGGSHMGGNYGDDR-KTGQPMINLYTDR-a3-b1	FUS	FUS	intra-protein xl	456	321	0	35.88	0	T3	3
FUS:321:x:FUS:456	APKPDGPGGGPGGSHMGGNYGDDR-KTGQPMINLYTDR-a3-b1	FUS	FUS	intra-protein xl	456	321	0	33.93	0.018	T4	3
FUS:321:x:FUS:456	APKPDGPGGGPGGSHMGGNYGDDR-KTGQPMINLYTDR-a3-b1	FUS	FUS	intra-protein xl	456	321	0	32.22	0	T1	2
FUS:321:x:FUS:456	APKPDGPGGGPGGSHMGGNYGDDR-KTGQPMINLYTDR-a3-b1	FUS	FUS	intra-protein xl	456	321	0	31.99	0	T11	3
FUS:321:x:FUS:456	APKPDGPGGGPGGSHMGGNYGDDR-KTGQPMINLYTDR-a3-b1	FUS	FUS	intra-protein xl	456	321	0	31.53	0	T8	2
FUS:321:x:FUS:456	APKPDGPGGGPGGSHMGGNYGDDR-KTGQPMINLYTDR-a3-b1	FUS	FUS	intra-protein xl	456	321	0	31.28	0.021	T5	3
FUS:321:x:FUS:456	APKPDGPGGGPGGSHMGGNYGDDR-KTGQPMINLYTDR-a3-b1	FUS	FUS	intra-protein xl	456	321	0	30.02	0.034	T6	3
FUS:321:x:FUS:456	APKPDGPGGGPGGSHMGGNYGDDR-KTGQPMINLYTDR-a3-b1	FUS	FUS	intra-protein xl	456	321	0	29.26	0.044	T10	2
FUS:321:x:FUS:456	APKPDGPGGGPGGSHMGGNYGDDR-KTGQPMINLYTDR-a3-b1	FUS	FUS	intra-protein xl	456	321	0	28.44	0	T9	3
FUS:321:x:FUS:456	APKPDGPGGGPGGSHMGGNYGDDR-KTGQPMINLYTDR-a3-b1	FUS	FUS	intra-protein xl	456	321	0	28.34	0.031	T7	3
FUS:321:x:FUS:456	APKPDGPGGGPGGSHMGGNYGDDR-KTGQPMINLYTDR-a3-b1	FUS	FUS	intra-protein xl	456	321	0	27.55	0	T2	3
FUS:321:x:FUS:453	NECNQCKAPKPDGPGGGPGGSHMGGNYGDDR-KTGQPMINLYTDR-a7-b1	FUS	FUS	intra-protein xl	453	321	0	34.06	0	T6	3
FUS:321:x:FUS:453	NECNQCKAPKPDGPGGGPGGSHMGGNYGDDR-KTGQPMINLYTDR-a7-b1	FUS	FUS	intra-protein xl	453	321	0.75	33.36	0.018	T4	2
FUS:321:x:FUS:453	NECNQCKAPKPDGPGGGPGGSHMGGNYGDDR-KTGQPMINLYTDR-a7-b1	FUS	FUS	intra-protein xl	453	321	0.76	31.42	0	T8	2
FUS:321:x:FUS:453	NECNQCKAPKPDGPGGGPGGSHMGGNYGDDR-KTGQPMINLYTDR-a7-b1	FUS	FUS	intra-protein xl	453	321	0.77	30.92	0.02	T9	3
FUS:321:x:FUS:453	NECNQCKAPKPDGPGGGPGGSHMGGNYGDDR-KTGQPMINLYTDR-a7-b1	FUS	FUS	intra-protein xl	453	321	0	29.28	0.02	T2	2
FUS:321:x:FUS:453	NECNQCKAPKPDGPGGGPGGSHMGGNYGDDR-KTGQPMINLYTDR-a7-b1	FUS	FUS	intra-protein xl	453	321	0.92	29.22	0	T5	2
FUS:321:x:FUS:453	NECNQCKAPKPDGPGGGPGGSHMGGNYGDDR-KTGQPMINLYTDR-a7-b1	FUS	FUS	intra-protein xl	453	321	0.84	27.46	0	T1	3
FUS:321:x:FUS:453	NECNQCKAPKPDGPGGGPGGSHMGGNYGDDR-KTGQPMINLYTDR-a7-b1	FUS	FUS	intra-protein xl	453	321	0.91	26.78	0.022	T7	2
FUS:321:x:FUS:432	AGDWKCPNPTCENMNFSWR-KTGQPMINLYTDR-a5-b1	FUS	FUS	intra-protein xl	432	321	0	38.06	0	T4	2
FUS:321:x:FUS:432	AGDWKCPNPTCENMNFSWR-KTGQPMINLYTDR-a5-b1	FUS	FUS	intra-protein xl	432	321	0	34.65	0	T5	3
FUS:321:x:FUS:432	AGDWKCPNPTCENMNFSWR-KTGQPMINLYTDR-a5-b1	FUS	FUS	intra-protein xl	432	321	0	33.51	0.019	T8	3
FUS:321:x:FUS:432	AGDWKCPNPTCENMNFSWR-KTGQPMINLYTDR-a5-b1	FUS	FUS	intra-protein xl	432	321	0	32.53	0	T1	3
FUS:321:x:FUS:432	AGDWKCPNPTCENMNFSWR-KTGQPMINLYTDR-a5-b1	FUS	FUS	intra-protein xl	432	321	0	32.5	0	T6	3
FUS:321:x:FUS:432	AGDWKCPNPTCENMNFSWR-KTGQPMINLYTDR-a5-b1	FUS	FUS	intra-protein xl	432	321	0	30.93	0.02	T2	2
FUS:321:x:FUS:432	AGDWKCPNPTCENMNFSWR-KTGQPMINLYTDR-a5-b1	FUS	FUS	intra-protein xl	432	321	0	30.12	0	T11	2
FUS:321:x:FUS:432	AGDWKCPNPTCENMNFSWR-KTGQPMINLYTDR-a5-b1	FUS	FUS	intra-protein xl	432	321	0	28.51	0	T3	3
FUS:321:x:FUS:370	AAIDWFDGKEFSGNPIKVSFATR-KTGQPMINLYTDR-a17-b1	FUS	FUS	intra-protein xl	370	321	0	43.45	0	T5	3
FUS:321:x:FUS:370	AAIDWFDGKEFSGNPIKVSFATR-KTGQPMINLYTDR-a17-b1	FUS	FUS	intra-protein xl	370	321	0	37.31	0	T3	3
FUS:321:x:FUS:370	AAIDWFDGKEFSGNPIKVSFATR-KTGQPMINLYTDR-a17-b1	FUS	FUS	intra-protein xl	370	321	0	37.27	0	T6	3
FUS:321:x:FUS:370	AAIDWFDGKEFSGNPIKVSFATR-KTGQPMINLYTDR-a17-b1	FUS	FUS	intra-protein xl	370	321	0	36.76	0	T11	2
FUS:321:x:FUS:370	EFSGNPIKVSFATR-KTGQPMINLYTDR-a8-b1	FUS	FUS	intra-protein xl	370	321	0	36.26	0	T4	3
FUS:321:x:FUS:370	EFSGNPIKVSFATR-KTGQPMINLYTDR-a8-b1	FUS	FUS	intra-protein xl	370	321	0	35.97	0	T8	3
FUS:321:x:FUS:370	EFSGNPIKVSFATR-KTGQPMINLYTDR-a8-b1	FUS	FUS	intra-protein xl	370	321	0	34.65	0	T1	2
FUS:321:x:FUS:370	EFSGNPIKVSFATR-KTGQPMINLYTDR-a8-b1	FUS	FUS	intra-protein xl	370	321	0	34.6	0	T2	3
FUS:321:x:FUS:370	EFSGNPIKVSFATR-KTGQPMINLYTDR-a8-b1	FUS	FUS	intra-protein xl	370	321	0	31.95	0	T9	3
FUS:321:x:FUS:370	EFSGNPIKVSFATR-KTGQPMINLYTDR-a8-b1	FUS	FUS	intra-protein xl	370	321	0	29.5	0.032	T10	2
FUS:321:x:FUS:370	EFSGNPIKVSFATR-KTGQPMINLYTDR-a8-b1	FUS	FUS	intra-protein xl	370	321	0	28.34	0.022	T7	2
FUS:321:x:FUS:362	AAIDWFDGKEFSGNPIK-KTGQPMINLYTDR-a9-b1	FUS	FUS	intra-protein xl	362	321	0	42.94	0	T3	3
FUS:321:x:FUS:362	AAIDWFDGKEFSGNPIK-KTGQPMINLYTDR-a9-b1	FUS	FUS	intra-protein xl	362	321	0.22	41.71	0	T1	3
FUS:321:x:FUS:362	AAIDWFDGKEFSGNPIK-KTGQPMINLYTDR-a9-b1	FUS	FUS	intra-protein xl	362	321	0.63	41.24	0	T4	3
FUS:321:x:FUS:362	AAIDWFDGKEFSGNPIK-KTGQPMINLYTDR-a9-b1	FUS	FUS	intra-protein xl	362	321	0.62	40.28	0	T6	3
FUS:321:x:FUS:362	AAIDWFDGKEFSGNPIK-KTGQPMINLYTDR-a9-b1	FUS	FUS	intra-protein xl	362	321	0.58	39.57	0.029	T10	3
FUS:321:x:FUS:362	AAIDWFDGKEFSGNPIK-KTGQPMINLYTDR-a9-b1	FUS	FUS	intra-protein xl	362	321	0.63	38.82	0.019	T8	3
FUS:321:x:FUS:362	AAIDWFDGKEFSGNPIK-KTGQPMINLYTDR-a9-b1	FUS	FUS	intra-protein xl	362	321	0	38.81	0	T5	3
FUS:321:x:FUS:362	AAIDWFDGKEFSGNPIK-KTGQPMINLYTDR-a9-b1	FUS	FUS	intra-protein xl	362	321	0.23	37.85	0.02	T2	3
FUS:321:x:FUS:362	AAIDWFDGKEFSGNPIK-KTGQPMINLYTDR-a9-b1	FUS	FUS	intra-protein xl	362	321	0	36.25	0	T11	3
FUS:321:x:FUS:362	AAIDWFDGKEFSGNPIK-KTGQPMINLYTDR-a9-b1	FUS	FUS	intra-protein xl	362	321	0.57	36.12	0	T7	3
FUS:321:x:FUS:362	AAIDWFDGKEFSGNPIK-KTGQPMINLYTDR-a9-b1	FUS	FUS	intra-protein xl	362	321	0.65	35.27	0	T9	3
FUS:321:x:FUS:339	LKGEATVSFDDPPSAK-KTGQPMINLYTDR-a2-b1	FUS	FUS	intra-protein xl	339	321	0	42.83	0	T11	3
FUS:321:x:FUS:339	LKGEATVSFDDPPSAK-KTGQPMINLYTDR-a2-b1	FUS	FUS	intra-protein xl	339	321	0	40.89	0	T2	3
FUS:321:x:FUS:339	LKGEATVSFDDPPSAK-KTGQPMINLYTDR-a2-b1	FUS	FUS	intra-protein xl	339	321	0	40.43	0	T5	3
FUS:321:x:FUS:339	LKGEATVSFDDPPSAK-KTGQPMINLYTDR-a2-b1	FUS	FUS	intra-protein xl	339	321	0	39.34	0	T1	3
FUS:321:x:FUS:339	LKGEATVSFDDPPSAK-KTGQPMINLYTDR-a2-b1	FUS	FUS	intra-protein xl	339	321	0.54	39.3	0.029	T10	3
FUS:321:x:FUS:339	LKGEATVSFDDPPSAK-KTGQPMINLYTDR-a2-b1	FUS	FUS	intra-protein xl	339	321	0.5	39.3	0	T7	3
FUS:321:x:FUS:339	LKGEATVSFDDPPSAK-KTGQPMINLYTDR-a2-b1	FUS	FUS	intra-protein xl	339	321	0.54	39.03	0	T3	3
FUS:321:x:FUS:339	LKGEATVSFDDPPSAK-KTGQPMINLYTDR-a2-b1	FUS	FUS	intra-protein xl	339	321	0	37.87	0	T9	3
FUS:321:x:FUS:339	LKGEATVSFDDPPSAK-KTGQPMINLYTDR-a2-b1	FUS	FUS	intra-protein xl	339	321	0	37.69	0	T4	3
FUS:321:x:FUS:339	LKGEATVSFDDPPSAK-KTGQPMINLYTDR-a2-b1	FUS	FUS	intra-protein xl	339	321	0	37.54	0	T6	3
FUS:321:x:FUS:339	LKGEATVSFDDPPSAK-KTGQPMINLYTDR-a2-b1	FUS	FUS	intra-protein xl	339	321	0.48	35.6	0.019	T8	3
FUS:321:x:FUS:337	KTGQPMINLYTDR-ETGKLK-a1-b4	FUS	FUS	intra-protein xl	321	337	0	32.97	0.033	T8	3
FUS:321:x:FUS:337	ETGKLKGEATVSFDDPPSAK-KTGQPMINLYTDR-a4-b1	FUS	FUS	intra-protein xl	337	321	0.93	31.96	0	T3	3
FUS:321:x:FUS:337	KTGQPMINLYTDR-ETGKLK-a1-b4	FUS	FUS	intra-protein xl	321	337	0	31.88	0	T6	3
FUS:321:x:FUS:337	KTGQPMINLYTDR-ETGKLK-a1-b4	FUS	FUS	intra-protein xl	321	337	0	31.75	0	T7	2
FUS:321:x:FUS:337	KTGQPMINLYTDR-ETGKLK-a1-b4	FUS	FUS	intra-protein xl	321	337	0.45	30.32	0	T4	3
FUS:321:x:FUS:337	KTGQPMINLYTDR-ETGKLK-a1-b4	FUS	FUS	intra-protein xl	321	337	0	29.97	0.02	T9	2
FUS:321:x:FUS:337	KTGQPMINLYTDR-ETGKLK-a1-b4	FUS	FUS	intra-protein xl	321	337	0	27.82	0	T1	3
FUS:321:x:FUS:337	KTGQPMINLYTDR-ETGKLK-a1-b4	FUS	FUS	intra-protein xl	321	337	0	27.01	0	T2	3
FUS:321	KTGQPMINLYTDRETGK-K1-155	FUS	-	monolink	321		0.09	44.06	0	T10	3
FUS:321	KTGQPMINLYTDRETGK-K1-155	FUS	-	monolink	321		0.01	41.92	0	T11	3
FUS:321	KTGQPMINLYTDR-K1-155	FUS	-	monolink	321		0	41.55	0	T9	3
FUS:321	KTGQPMINLYTDR-K1-155	FUS	-	monolink	321		0	40.76	0	T2	3
FUS:321	KTGQPMINLYTDR-K1-155	FUS	-	monolink	321		0	40.71	0	T7	3
FUS:321	KTGQPMINLYTDRETGK-K1-155	FUS	-	monolink	321		0.09	40.51	0	T1	3
FUS:321	KTGQPMINLYTDR-K1-155	FUS	-	monolink	321		0	40.44	0	T4	3
FUS:321	KTGQPMINLYTDR-K1-155	FUS	-	monolink	321		0	40.37	0	T5	3
FUS:321	KTGQPMINLYTDRETGK-K1-155	FUS	-	monolink	321		0	39.71	0	T8	3
FUS:321	KTGQPMINLYTDR-K1-155	FUS	-	monolink	321		0	38.36	0	T6	3
FUS:321	KTGQPMINLYTDR-K1-155	FUS	-	monolink	321		0	38.26	0	T3	3
FUS:320:x:FUS:515	GGFGPGKMDSR-QIGIIKTNKK-a7-b9	FUS	FUS	intra-protein xl	515	320	0.78	34.34	0	T4	2
FUS:320:x:FUS:515	GGFGPGKMDSR-QIGIIKTNKK-a7-b9	FUS	FUS	intra-protein xl	515	320	0.47	34.07	0	T1	2
FUS:320:x:FUS:515	GGFGPGKMDSR-QIGIIKTNKK-a7-b9	FUS	FUS	intra-protein xl	515	320	0.75	33.87	0	T3	2
FUS:320:x:FUS:321	TNKKTGQPMINLYTDR-K3-K4	FUS	-	looplink	320	321	0	42.23	0	T7	3
FUS:320:x:FUS:321	TNKKTGQPMINLYTDR-K3-K4	FUS	-	looplink	320	321	0	41.4	0	T9	3
FUS:320:x:FUS:321	TNKKTGQPMINLYTDR-K3-K4	FUS	-	looplink	320	321	0	39.9	0	T1	3
FUS:320:x:FUS:321	TNKKTGQPMINLYTDR-K3-K4	FUS	-	looplink	320	321	0	39.42	0	T11	3
FUS:320:x:FUS:321	TNKKTGQPMINLYTDR-K3-K4	FUS	-	looplink	320	321	0	38.71	0	T10	3
FUS:320:x:FUS:321	TNKKTGQPMINLYTDR-K3-K4	FUS	-	looplink	320	321	0	38.64	0	T5	3
FUS:320:x:FUS:321	TNKKTGQPMINLYTDR-K3-K4	FUS	-	looplink	320	321	0	37.92	0	T3	3
FUS:320:x:FUS:321	TNKKTGQPMINLYTDR-K3-K4	FUS	-	looplink	320	321	0	37.85	0	T2	3
FUS:320:x:FUS:321	TNKKTGQPMINLYTDR-K3-K4	FUS	-	looplink	320	321	0	37.72	0	T8	3
FUS:320:x:FUS:321	TNKKTGQPMINLYTDR-K3-K4	FUS	-	looplink	320	321	0	37.52	0	T6	3
FUS:320:x:FUS:321	TNKKTGQPMINLYTDR-K3-K4	FUS	-	looplink	320	321	0	36.62	0	T4	3
FUS:320	QIGIIKTNKK-K9-156	FUS	-	monolink	320		0.58	28.79	0	T5	3
FUS:320	QIGIIKTNKK-K9-155	FUS	-	monolink	320		0.83	25.13	0	T3	2
FUS:317:x:FUS:515	GGFGPGKMDSR-QIGIIKTNKK-a7-b6	FUS	FUS	intra-protein xl	515	317	0.78	42.6	0	T6	3
FUS:317:x:FUS:515	GGFGPGKMDSR-QIGIIKTNK-a7-b6	FUS	FUS	intra-protein xl	515	317	0.71	40.92	0	T8	3
FUS:317:x:FUS:515	GGFGPGKMDSR-QIGIIKTNK-a7-b6	FUS	FUS	intra-protein xl	515	317	0	40.74	0	T11	3
FUS:317:x:FUS:515	GGFGPGKMDSR-QIGIIKTNK-a7-b6	FUS	FUS	intra-protein xl	515	317	0.79	40.39	0	T10	3
FUS:317:x:FUS:515	GGFGPGKMDSR-QIGIIKTNK-a7-b6	FUS	FUS	intra-protein xl	515	317	0.66	39.03	0	T4	2
FUS:317:x:FUS:515	GGFGPGKMDSR-QIGIIKTNK-a7-b6	FUS	FUS	intra-protein xl	515	317	0.66	37.6	0	T5	3
FUS:317:x:FUS:515	GGFGPGKMDSR-QIGIIKTNK-a7-b6	FUS	FUS	intra-protein xl	515	317	0.61	35.62	0	T7	3
FUS:317:x:FUS:515	GGFGPGKMDSR-QIGIIKTNK-a7-b6	FUS	FUS	intra-protein xl	515	317	0.68	35.46	0	T2	3
FUS:317:x:FUS:515	GGFGPGKMDSR-QIGIIKTNK-a7-b6	FUS	FUS	intra-protein xl	515	317	0.69	34.7	0	T1	3
FUS:317:x:FUS:515	GGFGPGKMDSR-QIGIIKTNK-a7-b6	FUS	FUS	intra-protein xl	515	317	0.53	34.69	0	T9	3
FUS:317:x:FUS:456	NECNQCKAPKPDGPGGGPGGSHMGGNYGDDR-QIGIIKTNK-a10-b6	FUS	FUS	intra-protein xl	456	317	0.52	28.03	0.055	T6	2
FUS:317:x:FUS:456	APKPDGPGGGPGGSHMGGNYGDDR-QIGIIKTNK-a3-b6	FUS	FUS	intra-protein xl	456	317	0.57	27.79	0.062	T8	2
FUS:317:x:FUS:456	NECNQCKAPKPDGPGGGPGGSHMGGNYGDDR-QIGIIKTNK-a10-b6	FUS	FUS	intra-protein xl	456	317	0.45	25.83	0	T3	3
FUS:317:x:FUS:453	NECNQCKAPKPDGPGGGPGGSHMGGNYGDDR-QIGIIKTNK-a7-b6	FUS	FUS	intra-protein xl	453	317	0	29.2	0	T1	2
FUS:317:x:FUS:453	NECNQCKAPKPDGPGGGPGGSHMGGNYGDDR-QIGIIKTNK-a7-b6	FUS	FUS	intra-protein xl	453	317	0	29.13	0	T6	2
FUS:317:x:FUS:453	NECNQCKAPKPDGPGGGPGGSHMGGNYGDDR-QIGIIKTNK-a7-b6	FUS	FUS	intra-protein xl	453	317	0.57	26.15	0.027	T4	2
FUS:317:x:FUS:432	AGDWKCPNPTCENMNFSWR-QIGIIKTNK-a5-b6	FUS	FUS	intra-protein xl	432	317	0.33	30.89	0.034	T6	3
FUS:317:x:FUS:432	AGDWKCPNPTCENMNFSWR-QIGIIKTNK-a5-b6	FUS	FUS	intra-protein xl	432	317	0	28.42	0.027	T4	2
FUS:317:x:FUS:432	AGDWKCPNPTCENMNFSWR-QIGIIKTNK-a5-b6	FUS	FUS	intra-protein xl	432	317	0.79	27.18	0.051	T8	2
FUS:317:x:FUS:432	AGDWKCPNPTCENMNFSWR-QIGIIKTNK-a5-b6	FUS	FUS	intra-protein xl	432	317	0	26.65	0.06	T11	2
FUS:317:x:FUS:370	AAIDWFDGKEFSGNPIKVSFATR-QIGIIKTNK-a17-b6	FUS	FUS	intra-protein xl	370	317	0	28.52	0	T11	2
FUS:317:x:FUS:370	EFSGNPIKVSFATR-QIGIIKTNKK-a8-b6	FUS	FUS	intra-protein xl	370	317	0.16	28.15	0.024	T9	2
FUS:317:x:FUS:370	EFSGNPIKVSFATR-QIGIIKTNKK-a8-b6	FUS	FUS	intra-protein xl	370	317	0.94	27.7	0	T6	3
FUS:317:x:FUS:370	EFSGNPIKVSFATR-QIGIIKTNK-a8-b6	FUS	FUS	intra-protein xl	370	317	0.87	27.22	0.062	T8	3
FUS:317:x:FUS:370	EFSGNPIKVSFATR-QIGIIKTNKK-a8-b6	FUS	FUS	intra-protein xl	370	317	0	26.97	0.021	T5	3
FUS:317:x:FUS:370	EFSGNPIKVSFATR-QIGIIKTNK-a8-b6	FUS	FUS	intra-protein xl	370	317	0.91	26.54	0.077	T7	2
FUS:317:x:FUS:370	EFSGNPIKVSFATR-QIGIIKTNK-a8-b6	FUS	FUS	intra-protein xl	370	317	0	25.82	0.014	T4	2
FUS:317:x:FUS:362	AAIDWFDGKEFSGNPIK-QIGIIKTNK-a9-b6	FUS	FUS	intra-protein xl	362	317	0	44.21	0	T8	3
FUS:317:x:FUS:362	AAIDWFDGKEFSGNPIK-QIGIIKTNK-a9-b6	FUS	FUS	intra-protein xl	362	317	0	42.66	0	T5	3
FUS:317:x:FUS:362	AAIDWFDGKEFSGNPIK-QIGIIKTNK-a9-b6	FUS	FUS	intra-protein xl	362	317	0	40.37	0	T11	3
FUS:317:x:FUS:362	AAIDWFDGKEFSGNPIK-QIGIIKTNK-a9-b6	FUS	FUS	intra-protein xl	362	317	0.54	40.28	0	T6	3
FUS:317:x:FUS:362	AAIDWFDGKEFSGNPIK-QIGIIKTNK-a9-b6	FUS	FUS	intra-protein xl	362	317	0	38.77	0	T10	3
FUS:317:x:FUS:362	AAIDWFDGKEFSGNPIK-QIGIIKTNK-a9-b6	FUS	FUS	intra-protein xl	362	317	0.39	38.38	0	T7	3
FUS:317:x:FUS:362	AAIDWFDGKEFSGNPIK-QIGIIKTNK-a9-b6	FUS	FUS	intra-protein xl	362	317	0	37.36	0	T4	3
FUS:317:x:FUS:362	AAIDWFDGKEFSGNPIK-QIGIIKTNK-a9-b6	FUS	FUS	intra-protein xl	362	317	0.33	37.18	0	T9	3
FUS:317:x:FUS:362	AAIDWFDGKEFSGNPIK-QIGIIKTNK-a9-b6	FUS	FUS	intra-protein xl	362	317	0	35.6	0	T1	3
FUS:317:x:FUS:362	AAIDWFDGKEFSGNPIK-QIGIIKTNKK-a9-b6	FUS	FUS	intra-protein xl	362	317	0	35.48	0	T3	3
FUS:317:x:FUS:362	AAIDWFDGKEFSGNPIK-QIGIIKTNK-a9-b6	FUS	FUS	intra-protein xl	362	317	0.25	33.52	0	T2	3
FUS:317:x:FUS:339	LKGEATVSFDDPPSAK-QIGIIKTNK-a2-b6	FUS	FUS	intra-protein xl	339	317	0.86	35.39	0	T7	3
FUS:317:x:FUS:339	LKGEATVSFDDPPSAK-QIGIIKTNK-a2-b6	FUS	FUS	intra-protein xl	339	317	0.87	34.06	0.032	T10	3
FUS:317:x:FUS:339	LKGEATVSFDDPPSAK-QIGIIKTNK-a2-b6	FUS	FUS	intra-protein xl	339	317	0.86	34.06	0.02	T9	3
FUS:317:x:FUS:339	LKGEATVSFDDPPSAK-QIGIIKTNK-a2-b6	FUS	FUS	intra-protein xl	339	317	0.84	33.78	0.033	T8	3
FUS:317:x:FUS:339	LKGEATVSFDDPPSAK-QIGIIKTNK-a2-b6	FUS	FUS	intra-protein xl	339	317	0.83	33.4	0.023	T6	3
FUS:317:x:FUS:339	LKGEATVSFDDPPSAK-QIGIIKTNK-a2-b6	FUS	FUS	intra-protein xl	339	317	0.88	33.16	0	T11	3
FUS:317:x:FUS:339	LKGEATVSFDDPPSAK-QIGIIKTNK-a2-b6	FUS	FUS	intra-protein xl	339	317	0.93	31.34	0.021	T5	2
FUS:317:x:FUS:339	LKGEATVSFDDPPSAK-QIGIIKTNK-a2-b6	FUS	FUS	intra-protein xl	339	317	0.89	26.77	0.014	T4	2
FUS:317:x:FUS:337	QIGIIKTNK-ETGKLK-a6-b4	FUS	FUS	intra-protein xl	317	337	0.66	32.83	0.019	T8	2
FUS:317:x:FUS:337	QIGIIKTNK-ETGKLK-a6-b4	FUS	FUS	intra-protein xl	317	337	0.74	31.67	0	T7	2
FUS:317:x:FUS:337	QIGIIKTNK-ETGKLK-a6-b4	FUS	FUS	intra-protein xl	317	337	0.62	31.55	0	T2	3
FUS:317:x:FUS:337	QIGIIKTNK-ETGKLK-a6-b4	FUS	FUS	intra-protein xl	317	337	0.7	30.37	0.023	T6	2
FUS:317:x:FUS:337	QIGIIKTNK-ETGKLK-a6-b4	FUS	FUS	intra-protein xl	317	337	0.53	29.69	0.027	T1	3
FUS:317:x:FUS:337	QIGIIKTNK-ETGKLK-a6-b4	FUS	FUS	intra-protein xl	317	337	0.59	29.39	0	T3	3
FUS:317:x:FUS:337	QIGIIKTNK-ETGKLK-a6-b4	FUS	FUS	intra-protein xl	317	337	0.7	27.58	0.027	T4	2
FUS:317:x:FUS:321	KTGQPMINLYTDR-QIGIIKTNK-a1-b6	FUS	FUS	intra-protein xl	321	317	0	38.16	0	T8	3
FUS:317:x:FUS:321	KTGQPMINLYTDR-QIGIIKTNK-a1-b6	FUS	FUS	intra-protein xl	321	317	0	37.94	0	T1	3
FUS:317:x:FUS:321	KTGQPMINLYTDR-QIGIIKTNK-a1-b6	FUS	FUS	intra-protein xl	321	317	0	36.32	0	T9	3
FUS:317:x:FUS:321	KTGQPMINLYTDR-QIGIIKTNK-a1-b6	FUS	FUS	intra-protein xl	321	317	0	36.18	0	T2	3
FUS:317:x:FUS:321	KTGQPMINLYTDR-QIGIIKTNK-a1-b6	FUS	FUS	intra-protein xl	321	317	0.82	35.53	0	T7	3
FUS:317:x:FUS:321	KTGQPMINLYTDR-QIGIIKTNK-a1-b6	FUS	FUS	intra-protein xl	321	317	0.87	35.41	0	T4	3
FUS:317:x:FUS:321	KTGQPMINLYTDR-QIGIIKTNK-a1-b6	FUS	FUS	intra-protein xl	321	317	0	34.93	0.029	T10	3
FUS:317:x:FUS:321	KTGQPMINLYTDR-QIGIIKTNK-a1-b6	FUS	FUS	intra-protein xl	321	317	0	34.71	0	T11	3
FUS:317:x:FUS:321	KTGQPMINLYTDR-QIGIIKTNK-a1-b6	FUS	FUS	intra-protein xl	321	317	0	34.49	0	T3	3
FUS:317:x:FUS:321	KTGQPMINLYTDRETGK-QIGIIKTNK-a1-b6	FUS	FUS	intra-protein xl	321	317	0	33.9	0	T6	3
FUS:317:x:FUS:321	KTGQPMINLYTDR-QIGIIKTNK-a1-b6	FUS	FUS	intra-protein xl	321	317	0	33.88	0	T5	3
FUS:317:x:FUS:320	QIGIIKTNKK-K6-K9	FUS	-	looplink	317	320	0	35.37	0	T10	3
FUS:317:x:FUS:320	QIGIIKTNKK-K6-K9	FUS	-	looplink	317	320	0.55	33.91	0	T5	2
FUS:317:x:FUS:320	QIGIIKTNKK-K6-K9	FUS	-	looplink	317	320	0.52	33.22	0	T9	3
FUS:317	QIGIIKTNKK-K6-155	FUS	-	monolink	317		0.51	38.36	0	T6	3
FUS:317	QIGIIKTNKK-K6-155	FUS	-	monolink	317		0	37.83	0	T2	3
FUS:317	QIGIIKTNKK-K6-155	FUS	-	monolink	317		0.47	37.19	0	T11	3
FUS:317	QIGIIKTNKK-K6-156	FUS	-	monolink	317		0.67	36.48	0	T4	3
FUS:317	QIGIIKTNKK-K6-155	FUS	-	monolink	317		0.39	35.98	0	T10	3
FUS:317	QIGIIKTNKK-K6-156	FUS	-	monolink	317		0.53	35.55	0	T5	3
FUS:317	QIGIIKTNKK-K6-156	FUS	-	monolink	317		0.52	35.29	0	T9	3
FUS:317	QIGIIKTNKK-K6-155	FUS	-	monolink	317		0.59	34.76	0	T1	3
FUS:317	QIGIIKTNKK-K6-155	FUS	-	monolink	317		0.52	34.3	0	T8	3
FUS:317	QIGIIKTNKK-K6-155	FUS	-	monolink	317		0.48	34.09	0	T7	3
FUS:317	QIGIIKTNKK-K6-155	FUS	-	monolink	317		0	31.23	0	T3	3
FUS:311	HDSEQDNSDNNTIFVQGLGENVTIESVADYFKQIGIIK-K32-155	FUS	-	monolink	311		0.05	45.02	0	T2	3
FUS:311	HDSEQDNSDNNTIFVQGLGENVTIESVADYFKQIGIIK-K32-156	FUS	-	monolink	311		0	37.3	0	T3	3
FUS:311	HDSEQDNSDNNTIFVQGLGENVTIESVADYFKQIGIIK-K32-156	FUS	-	monolink	311		0	35.1	0	T4	2
FUS:311	HDSEQDNSDNNTIFVQGLGENVTIESVADYFKQIGIIK-K32-156	FUS	-	monolink	311		0	29.68	0	T8	2
FUS:269:x:FUS:515	GGFGPGKMDSR-GGFNKFGGPR-a7-b5	FUS	FUS	intra-protein xl	515	269	0.67	47.6	0	T10	3
FUS:269:x:FUS:515	GGFGPGKMDSR-GGFNKFGGPR-a7-b5	FUS	FUS	intra-protein xl	515	269	0	47.14	0	T4	3
FUS:269:x:FUS:515	GGFGPGKMDSR-GGFNKFGGPR-a7-b5	FUS	FUS	intra-protein xl	515	269	0	46.64	0	T11	3
FUS:269:x:FUS:515	GGFGPGKMDSR-GGFNKFGGPR-a7-b5	FUS	FUS	intra-protein xl	515	269	0.63	45.36	0	T5	3
FUS:269:x:FUS:515	GGFGPGKMDSR-GGFNKFGGPR-a7-b5	FUS	FUS	intra-protein xl	515	269	0	45.25	0	T6	3
FUS:269:x:FUS:515	GGFGPGKMDSR-GGFNKFGGPR-a7-b5	FUS	FUS	intra-protein xl	515	269	0	44.92	0	T8	2
FUS:269:x:FUS:515	GGFGPGKMDSR-GGFNKFGGPR-a7-b5	FUS	FUS	intra-protein xl	515	269	0.68	44.69	0	T2	3
FUS:269:x:FUS:515	GGFGPGKMDSR-GGFNKFGGPR-a7-b5	FUS	FUS	intra-protein xl	515	269	0	43.33	0	T7	3
FUS:269:x:FUS:515	GGFGPGKMDSR-GGFNKFGGPR-a7-b5	FUS	FUS	intra-protein xl	515	269	0.69	42.82	0	T9	3
FUS:269:x:FUS:515	GGFGPGKMDSR-GGFNKFGGPR-a7-b5	FUS	FUS	intra-protein xl	515	269	0.66	42.48	0	T3	3
FUS:269:x:FUS:515	GGFGPGKMDSR-GGFNKFGGPR-a7-b5	FUS	FUS	intra-protein xl	515	269	0.64	42.36	0	T1	3
FUS:269:x:FUS:456	APKPDGPGGGPGGSHMGGNYGDDR-GGFNKFGGPR-a3-b5	FUS	FUS	intra-protein xl	456	269	0	34.31	0.023	T6	3
FUS:269:x:FUS:456	APKPDGPGGGPGGSHMGGNYGDDR-GGFNKFGGPR-a3-b5	FUS	FUS	intra-protein xl	456	269	0	30.1	0.021	T11	3
FUS:269:x:FUS:456	APKPDGPGGGPGGSHMGGNYGDDR-GGFNKFGGPR-a3-b5	FUS	FUS	intra-protein xl	456	269	0	29.47	0.029	T10	2
FUS:269:x:FUS:453	NECNQCKAPKPDGPGGGPGGSHMGGNYGDDR-GGFNKFGGPR-a7-b5	FUS	FUS	intra-protein xl	453	269	0.55	44.76	0	T4	2
FUS:269:x:FUS:453	NECNQCKAPKPDGPGGGPGGSHMGGNYGDDR-GGFNKFGGPR-a7-b5	FUS	FUS	intra-protein xl	453	269	0.37	38.7	0	T6	2
FUS:269:x:FUS:453	NECNQCKAPKPDGPGGGPGGSHMGGNYGDDR-GGFNKFGGPR-a7-b5	FUS	FUS	intra-protein xl	453	269	0.46	36.8	0.029	T10	2
FUS:269:x:FUS:453	NECNQCKAPKPDGPGGGPGGSHMGGNYGDDR-GGFNKFGGPR-a7-b5	FUS	FUS	intra-protein xl	453	269	0.48	36.63	0	T3	3
FUS:269:x:FUS:453	NECNQCKAPKPDGPGGGPGGSHMGGNYGDDR-GGFNKFGGPR-a7-b5	FUS	FUS	intra-protein xl	453	269	0.57	35.12	0	T7	3
FUS:269:x:FUS:453	NECNQCKAPKPDGPGGGPGGSHMGGNYGDDR-GGFNKFGGPR-a7-b5	FUS	FUS	intra-protein xl	453	269	0.47	32.47	0	T8	2
FUS:269:x:FUS:453	NECNQCKAPKPDGPGGGPGGSHMGGNYGDDR-GGFNKFGGPR-a7-b5	FUS	FUS	intra-protein xl	453	269	0.63	31.69	0	T2	3
FUS:269:x:FUS:432	AGDWKCPNPTCENMNFSWR-GGFNKFGGPR-a5-b5	FUS	FUS	intra-protein xl	432	269	0	42.11	0	T6	3
FUS:269:x:FUS:432	AGDWKCPNPTCENMNFSWR-GGFNKFGGPR-a5-b5	FUS	FUS	intra-protein xl	432	269	0	41.05	0	T4	2
FUS:269:x:FUS:432	AGDWKCPNPTCENMNFSWR-GGFNKFGGPR-a5-b5	FUS	FUS	intra-protein xl	432	269	0	39.63	0	T5	2
FUS:269:x:FUS:432	AGDWKCPNPTCENMNFSWR-GGFNKFGGPR-a5-b5	FUS	FUS	intra-protein xl	432	269	0	37.92	0	T3	3
FUS:269:x:FUS:432	AGDWKCPNPTCENMNFSWR-GGFNKFGGPR-a5-b5	FUS	FUS	intra-protein xl	432	269	0	37.92	0.019	T8	3
FUS:269:x:FUS:432	AGDWKCPNPTCENMNFSWR-GGFNKFGGPR-a5-b5	FUS	FUS	intra-protein xl	432	269	0	37.84	0	T11	3
FUS:269:x:FUS:432	AGDWKCPNPTCENMNFSWR-GGFNKFGGPR-a5-b5	FUS	FUS	intra-protein xl	432	269	0	35.47	0	T2	3
FUS:269:x:FUS:370	AAIDWFDGKEFSGNPIKVSFATR-GGFNKFGGPR-a17-b5	FUS	FUS	intra-protein xl	370	269	0	42.04	0	T8	3
FUS:269:x:FUS:370	AAIDWFDGKEFSGNPIKVSFATR-GGFNKFGGPR-a17-b5	FUS	FUS	intra-protein xl	370	269	0	40.34	0	T11	3
FUS:269:x:FUS:370	AAIDWFDGKEFSGNPIKVSFATR-GGFNKFGGPR-a17-b5	FUS	FUS	intra-protein xl	370	269	0	39.73	0	T7	3
FUS:269:x:FUS:370	AAIDWFDGKEFSGNPIKVSFATR-GGFNKFGGPR-a17-b5	FUS	FUS	intra-protein xl	370	269	0	38.53	0.029	T10	2
FUS:269:x:FUS:370	EFSGNPIKVSFATR-GGFNKFGGPR-a8-b5	FUS	FUS	intra-protein xl	370	269	0	38.03	0	T1	3
FUS:269:x:FUS:370	AAIDWFDGKEFSGNPIKVSFATR-GGFNKFGGPR-a17-b5	FUS	FUS	intra-protein xl	370	269	0	37.89	0	T6	3
FUS:269:x:FUS:370	EFSGNPIKVSFATR-GGFNKFGGPR-a8-b5	FUS	FUS	intra-protein xl	370	269	0	36.53	0.02	T2	3
FUS:269:x:FUS:370	AAIDWFDGKEFSGNPIKVSFATR-GGFNKFGGPR-a17-b5	FUS	FUS	intra-protein xl	370	269	0	36.47	0	T5	3
FUS:269:x:FUS:370	AAIDWFDGKEFSGNPIKVSFATR-GGFNKFGGPR-a17-b5	FUS	FUS	intra-protein xl	370	269	0	36.11	0	T3	3
FUS:269:x:FUS:370	AAIDWFDGKEFSGNPIKVSFATR-GGFNKFGGPR-a17-b5	FUS	FUS	intra-protein xl	370	269	0	35.86	0	T4	3
FUS:269:x:FUS:370	EFSGNPIKVSFATR-GGFNKFGGPR-a8-b5	FUS	FUS	intra-protein xl	370	269	0	33.44	0.02	T9	2
FUS:269:x:FUS:362	AAIDWFDGKEFSGNPIK-GGFNKFGGPR-a9-b5	FUS	FUS	intra-protein xl	362	269	0.48	49.69	0	T10	3
FUS:269:x:FUS:362	AAIDWFDGKEFSGNPIK-GGFNKFGGPR-a9-b5	FUS	FUS	intra-protein xl	362	269	0.45	49.22	0	T7	3
FUS:269:x:FUS:362	AAIDWFDGKEFSGNPIK-GGFNKFGGPR-a9-b5	FUS	FUS	intra-protein xl	362	269	0.4	48.18	0	T8	3
FUS:269:x:FUS:362	AAIDWFDGKEFSGNPIK-GGFNKFGGPR-a9-b5	FUS	FUS	intra-protein xl	362	269	0.44	47.85	0	T5	3
FUS:269:x:FUS:362	AAIDWFDGKEFSGNPIK-GGFNKFGGPR-a9-b5	FUS	FUS	intra-protein xl	362	269	0.49	47.48	0	T4	3
FUS:269:x:FUS:362	AAIDWFDGKEFSGNPIK-GGFNKFGGPR-a9-b5	FUS	FUS	intra-protein xl	362	269	0.43	47.2	0	T6	3
FUS:269:x:FUS:362	AAIDWFDGKEFSGNPIK-GGFNKFGGPR-a9-b5	FUS	FUS	intra-protein xl	362	269	0.46	47.09	0	T1	3
FUS:269:x:FUS:362	AAIDWFDGKEFSGNPIK-GGFNKFGGPR-a9-b5	FUS	FUS	intra-protein xl	362	269	0.37	46.31	0	T9	3
FUS:269:x:FUS:362	AAIDWFDGKEFSGNPIK-GGFNKFGGPR-a9-b5	FUS	FUS	intra-protein xl	362	269	0.48	46.05	0	T3	3
FUS:269:x:FUS:362	AAIDWFDGKEFSGNPIK-GGFNKFGGPR-a9-b5	FUS	FUS	intra-protein xl	362	269	0.41	44.83	0	T11	3
FUS:269:x:FUS:362	AAIDWFDGKEFSGNPIK-GGFNKFGGPR-a9-b5	FUS	FUS	intra-protein xl	362	269	0.35	43.1	0	T2	3
FUS:269:x:FUS:339	LKGEATVSFDDPPSAK-GGFNKFGGPR-a2-b5	FUS	FUS	intra-protein xl	339	269	0.4	49.27	0	T4	3
FUS:269:x:FUS:339	LKGEATVSFDDPPSAK-GGFNKFGGPR-a2-b5	FUS	FUS	intra-protein xl	339	269	0.34	45.33	0	T2	3
FUS:269:x:FUS:339	LKGEATVSFDDPPSAK-GGFNKFGGPR-a2-b5	FUS	FUS	intra-protein xl	339	269	0.35	44.77	0	T9	3
FUS:269:x:FUS:339	LKGEATVSFDDPPSAK-GGFNKFGGPR-a2-b5	FUS	FUS	intra-protein xl	339	269	0.31	44.24	0	T5	3
FUS:269:x:FUS:339	LKGEATVSFDDPPSAK-GGFNKFGGPR-a2-b5	FUS	FUS	intra-protein xl	339	269	0	44.22	0	T1	3
FUS:269:x:FUS:339	LKGEATVSFDDPPSAK-GGFNKFGGPR-a2-b5	FUS	FUS	intra-protein xl	339	269	0.32	44.09	0	T3	3
FUS:269:x:FUS:339	LKGEATVSFDDPPSAK-GGFNKFGGPR-a2-b5	FUS	FUS	intra-protein xl	339	269	0.38	43.18	0	T6	3
FUS:269:x:FUS:339	LKGEATVSFDDPPSAK-GGFNKFGGPR-a2-b5	FUS	FUS	intra-protein xl	339	269	0.4	43.03	0	T11	3
FUS:269:x:FUS:339	LKGEATVSFDDPPSAK-GGFNKFGGPR-a2-b5	FUS	FUS	intra-protein xl	339	269	0	42.57	0	T7	3
FUS:269:x:FUS:339	LKGEATVSFDDPPSAK-GGFNKFGGPR-a2-b5	FUS	FUS	intra-protein xl	339	269	0.31	42.12	0	T8	3
FUS:269:x:FUS:339	LKGEATVSFDDPPSAK-GGFNKFGGPR-a2-b5	FUS	FUS	intra-protein xl	339	269	0.38	40.72	0	T10	3
FUS:269:x:FUS:337	GGFNKFGGPR-ETGKLK-a5-b4	FUS	FUS	intra-protein xl	269	337	0	35.03	0	T7	3
FUS:269:x:FUS:337	GGFNKFGGPR-ETGKLK-a5-b4	FUS	FUS	intra-protein xl	269	337	0	33.97	0	T2	3
FUS:269:x:FUS:337	GGFNKFGGPR-ETGKLK-a5-b4	FUS	FUS	intra-protein xl	269	337	0	33.37	0	T9	3
FUS:269:x:FUS:337	GGFNKFGGPR-ETGKLK-a5-b4	FUS	FUS	intra-protein xl	269	337	0	32.5	0	T8	3
FUS:269:x:FUS:337	GGFNKFGGPR-ETGKLK-a5-b4	FUS	FUS	intra-protein xl	269	337	0	31.51	0	T3	3
FUS:269:x:FUS:337	GGFNKFGGPR-ETGKLK-a5-b4	FUS	FUS	intra-protein xl	269	337	0	29.72	0.027	T1	3
FUS:269:x:FUS:337	GGFNKFGGPR-ETGKLK-a5-b4	FUS	FUS	intra-protein xl	269	337	0	28.71	0.027	T4	2
FUS:269:x:FUS:321	KTGQPMINLYTDR-GGFNKFGGPR-a1-b5	FUS	FUS	intra-protein xl	321	269	0	40	0	T6	3
FUS:269:x:FUS:321	KTGQPMINLYTDR-GGFNKFGGPR-a1-b5	FUS	FUS	intra-protein xl	321	269	0	37.76	0	T5	3
FUS:269:x:FUS:321	KTGQPMINLYTDR-GGFNKFGGPR-a1-b5	FUS	FUS	intra-protein xl	321	269	0	37.48	0	T3	3
FUS:269:x:FUS:321	KTGQPMINLYTDR-GGFNKFGGPR-a1-b5	FUS	FUS	intra-protein xl	321	269	0	37.48	0	T9	3
FUS:269:x:FUS:321	KTGQPMINLYTDR-GGFNKFGGPR-a1-b5	FUS	FUS	intra-protein xl	321	269	0	36.78	0	T7	3
FUS:269:x:FUS:321	KTGQPMINLYTDR-GGFNKFGGPR-a1-b5	FUS	FUS	intra-protein xl	321	269	0	36.67	0	T1	3
FUS:269:x:FUS:321	KTGQPMINLYTDR-GGFNKFGGPR-a1-b5	FUS	FUS	intra-protein xl	321	269	0	36.41	0.019	T8	3
FUS:269:x:FUS:321	KTGQPMINLYTDR-GGFNKFGGPR-a1-b5	FUS	FUS	intra-protein xl	321	269	0	36.22	0	T2	3
FUS:269:x:FUS:321	KTGQPMINLYTDR-GGFNKFGGPR-a1-b5	FUS	FUS	intra-protein xl	321	269	0	35.82	0	T4	3
FUS:269:x:FUS:321	KTGQPMINLYTDR-GGFNKFGGPR-a1-b5	FUS	FUS	intra-protein xl	321	269	0	34.86	0	T11	3
FUS:269:x:FUS:321	KTGQPMINLYTDR-GGFNKFGGPR-a1-b5	FUS	FUS	intra-protein xl	321	269	0	34.48	0.029	T10	3
FUS:269:x:FUS:317	GGFNKFGGPR-QIGIIKTNK-a5-b6	FUS	FUS	intra-protein xl	269	317	0	37.28	0	T8	3
FUS:269:x:FUS:317	GGFNKFGGPR-QIGIIKTNKK-a5-b6	FUS	FUS	intra-protein xl	269	317	0.86	37.13	0	T1	3
FUS:269:x:FUS:317	GGFNKFGGPR-QIGIIKTNK-a5-b6	FUS	FUS	intra-protein xl	269	317	0.61	36.95	0	T2	3
FUS:269:x:FUS:317	GGFNKFGGPR-QIGIIKTNK-a5-b6	FUS	FUS	intra-protein xl	269	317	0.56	36.85	0	T5	3
FUS:269:x:FUS:317	GGFNKFGGPR-QIGIIKTNK-a5-b6	FUS	FUS	intra-protein xl	269	317	0.65	36.08	0	T6	3
FUS:269:x:FUS:317	GGFNKFGGPR-QIGIIKTNK-a5-b6	FUS	FUS	intra-protein xl	269	317	0.73	34.34	0	T4	3
FUS:269:x:FUS:317	GGFNKFGGPR-QIGIIKTNK-a5-b6	FUS	FUS	intra-protein xl	269	317	0.46	34.03	0	T11	3
FUS:269:x:FUS:317	GGFNKFGGPR-QIGIIKTNK-a5-b6	FUS	FUS	intra-protein xl	269	317	0.66	33.21	0	T7	3
FUS:269:x:FUS:317	GGFNKFGGPR-QIGIIKTNK-a5-b6	FUS	FUS	intra-protein xl	269	317	0.66	32.52	0.02	T9	3
FUS:269:x:FUS:317	GGFNKFGGPR-QIGIIKTNK-a5-b6	FUS	FUS	intra-protein xl	269	317	0.69	30.41	0.032	T10	2
FUS:269	GGFNKFGGPRDQGSR-K5-156	FUS	-	monolink	269		0.3	34.13	0	T2	3
FUS:269	GGFNKFGGPRDQGSR-K5-156	FUS	-	monolink	269		0.27	29.08	0	T5	3
FUS:269	GGFNKFGGPRDQGSR-K5-156	FUS	-	monolink	269		0.12	28.1	0	T6	3
FUS:269	GGFNKFGGPRDQGSR-K5-156	FUS	-	monolink	269		0.47	26.14	0	T3	3
FUS:269	GGFNKFGGPRDQGSR-K5-156	FUS	-	monolink	269		0.21	25.68	0	T4	3

## Sheet: Table S2
Supplemental Table 2. FUS Aging Experiment Crosslink Quantification. Related to Figure 1C, S1D,E and F
Quantifiaction for each unique crosslinking site shown in Table S1
uID	experiment	link_type	ms1_area_sum	imputed	ms1_area_sum_ref	imputed_ref	log2ratio	referenceexperiment	pvalue	FDR
FUS:269	T2	monolink	25.3119	0	22.5873	0	2.72459	T1	0.000216882	0.00363648
FUS:269	T3	monolink	22.4844	0	22.5873	0	-0.102929	T1	0.574626	0.660391
FUS:269	T4	monolink	23.1727	0	22.5873	0	0.585338	T1	0.246183	0.39375
FUS:269	T5	monolink	22.2793	1	22.5873	0	-0.308045	T1	0.315683	0.467453
FUS:269	T6	monolink	22.542	0	22.5873	0	-0.0453294	T1	0.955415	0.980892
FUS:269	T7	monolink	25.6081	0	22.5873	0	3.02078	T1	0.000948933	0.00811865
FUS:269	T8	monolink	24.945	0	22.5873	0	2.3577	T1	0.00851658	0.0655776
FUS:269	T9	monolink	24.6397	0	22.5873	0	2.05236	T1	0.0111827	0.0430535
FUS:269	T10	monolink	25.3199	0	22.5873	0	2.73261	T1	0.000347128	0.0012728
FUS:269	T11	monolink	25.7083	0	22.5873	0	3.12101	T1	9.45991e-05	0.000662194
FUS:269:x:FUS:317	T2	xlink	25.3724	0	25.934	0	-0.5616	T1	0.0291574	0.0724232
FUS:269:x:FUS:317	T3	xlink	24.5856	0	25.934	0	-1.34835	T1	0.000606151	0.00388947
FUS:269:x:FUS:317	T4	xlink	25.299	0	25.934	0	-0.634956	T1	0.0179922	0.06927
FUS:269:x:FUS:317	T5	xlink	25.3313	0	25.934	0	-0.602647	T1	0.0154601	0.0457856
FUS:269:x:FUS:317	T6	xlink	25.4965	0	25.934	0	-0.43752	T1	0.0876708	0.292088
FUS:269:x:FUS:317	T7	xlink	25.8759	0	25.934	0	-0.0580455	T1	0.769655	0.834696
FUS:269:x:FUS:317	T8	xlink	25.7625	0	25.934	0	-0.17146	T1	0.438016	0.733201
FUS:269:x:FUS:317	T9	xlink	25.7759	0	25.934	0	-0.158099	T1	0.468394	0.601106
FUS:269:x:FUS:317	T10	xlink	25.4821	0	25.934	0	-0.451845	T1	0.0380814	0.0574955
FUS:269:x:FUS:317	T11	xlink	25.4381	0	25.934	0	-0.495864	T1	0.0265756	0.055306
FUS:269:x:FUS:321	T2	xlink	26.3759	0	26.9255	0	-0.549571	T1	0.00241973	0.0143322
FUS:269:x:FUS:321	T3	xlink	25.9109	0	26.9255	0	-1.01457	T1	8.31062e-06	0.000319959
FUS:269:x:FUS:321	T4	xlink	26.4253	0	26.9255	0	-0.500166	T1	0.0705901	0.209055
FUS:269:x:FUS:321	T5	xlink	26.5138	0	26.9255	0	-0.411696	T1	0.00115726	0.00734953
FUS:269:x:FUS:321	T6	xlink	26.5723	0	26.9255	0	-0.35315	T1	0.00350448	0.0337306
FUS:269:x:FUS:321	T7	xlink	26.1175	0	26.9255	0	-0.807999	T1	1.2229e-05	0.000470818
FUS:269:x:FUS:321	T8	xlink	26.4024	0	26.9255	0	-0.523053	T1	0.00123455	0.0135801
FUS:269:x:FUS:321	T9	xlink	26.3637	0	26.9255	0	-0.561758	T1	2.35205e-05	0.00090554
FUS:269:x:FUS:321	T10	xlink	25.7759	0	26.9255	0	-1.14955	T1	7.548e-06	8.3028e-05
FUS:269:x:FUS:321	T11	xlink	25.993	0	26.9255	0	-0.93246	T1	0.000558229	0.00238798
FUS:269:x:FUS:337	T2	xlink	24.4589	0	24.3412	0	0.117756	T1	0.671378	0.738516
FUS:269:x:FUS:337	T3	xlink	23.4263	0	24.3412	0	-0.914896	T1	0.072709	0.170132
FUS:269:x:FUS:337	T4	xlink	24.3858	0	24.3412	0	0.0445831	T1	0.871369	0.906695
FUS:269:x:FUS:337	T5	xlink	23.8477	0	24.3412	0	-0.493438	T1	0.43686	0.590145
FUS:269:x:FUS:337	T6	xlink	24.1567	0	24.3412	0	-0.184499	T1	0.737275	0.915648
FUS:269:x:FUS:337	T7	xlink	25.2835	0	24.3412	0	0.942296	T1	0.00781007	0.0280355
FUS:269:x:FUS:337	T8	xlink	24.6482	0	24.3412	0	0.307055	T1	0.291808	0.511156
FUS:269:x:FUS:337	T9	xlink	25.0933	0	24.3412	0	0.752079	T1	0.0237937	0.070466
FUS:269:x:FUS:337	T10	xlink	21.7017	0	24.3412	0	-2.63947	T1	1.82801e-05	0.000144203
FUS:269:x:FUS:337	T11	xlink	22.2231	0	24.3412	0	-2.1181	T1	0.000138652	0.000889683
FUS:269:x:FUS:339	T2	xlink	30.1143	0	30.3501	0	-0.235832	T1	0.276034	0.362837
FUS:269:x:FUS:339	T3	xlink	30.0971	0	30.3501	0	-0.253064	T1	0.307568	0.493391
FUS:269:x:FUS:339	T4	xlink	29.8684	0	30.3501	0	-0.481741	T1	0.0768105	0.211229
FUS:269:x:FUS:339	T5	xlink	30.0058	0	30.3501	0	-0.344329	T1	0.120896	0.227049
FUS:269:x:FUS:339	T6	xlink	30.5524	0	30.3501	0	0.202303	T1	0.40729	0.640027
FUS:269:x:FUS:339	T7	xlink	30.1998	0	30.3501	0	-0.150355	T1	0.558841	0.670786
FUS:269:x:FUS:339	T8	xlink	29.8561	0	30.3501	0	-0.494036	T1	0.0571019	0.169109
FUS:269:x:FUS:339	T9	xlink	29.9951	0	30.3501	0	-0.355076	T1	0.136036	0.26187
FUS:269:x:FUS:339	T10	xlink	29.7306	0	30.3501	0	-0.619516	T1	0.00814358	0.015294
FUS:269:x:FUS:339	T11	xlink	29.6209	0	30.3501	0	-0.729208	T1	0.00466362	0.0141684
FUS:269:x:FUS:362	T2	xlink	27.8342	0	28.2801	0	-0.445904	T1	0.0123383	0.03768
FUS:269:x:FUS:362	T3	xlink	27.901	0	28.2801	0	-0.379099	T1	0.00652403	0.0275798
FUS:269:x:FUS:362	T4	xlink	27.9143	0	28.2801	0	-0.365804	T1	0.00488822	0.0277604
FUS:269:x:FUS:362	T5	xlink	27.8076	0	28.2801	0	-0.472509	T1	0.00550848	0.0179347
FUS:269:x:FUS:362	T6	xlink	28.2412	0	28.2801	0	-0.0389727	T1	0.717786	0.915648
FUS:269:x:FUS:362	T7	xlink	27.9214	0	28.2801	0	-0.35871	T1	0.0127032	0.0349339
FUS:269:x:FUS:362	T8	xlink	28.0311	0	28.2801	0	-0.249058	T1	0.0545623	0.169109
FUS:269:x:FUS:362	T9	xlink	28.3613	0	28.2801	0	0.0811346	T1	0.40138	0.542216
FUS:269:x:FUS:362	T10	xlink	27.9844	0	28.2801	0	-0.295773	T1	0.0252105	0.0404418
FUS:269:x:FUS:362	T11	xlink	28.15	0	28.2801	0	-0.130114	T1	0.241939	0.310489
FUS:269:x:FUS:370	T2	xlink	26.9527	0	27.2867	0	-0.334065	T1	0.0601021	0.115646
FUS:269:x:FUS:370	T3	xlink	26.7713	0	27.2867	0	-0.515467	T1	0.00119884	0.00659363
FUS:269:x:FUS:370	T4	xlink	26.6681	0	27.2867	0	-0.618615	T1	0.00086615	0.0111156
FUS:269:x:FUS:370	T5	xlink	26.7638	0	27.2867	0	-0.522914	T1	0.000503128	0.00456026
FUS:269:x:FUS:370	T6	xlink	26.9184	0	27.2867	0	-0.368356	T1	0.0288703	0.146326
FUS:269:x:FUS:370	T7	xlink	27.0934	0	27.2867	0	-0.19329	T1	0.111626	0.209639
FUS:269:x:FUS:370	T8	xlink	27.0332	0	27.2867	0	-0.253551	T1	0.030476	0.138038
FUS:269:x:FUS:370	T9	xlink	26.9363	0	27.2867	0	-0.350404	T1	0.00857445	0.0377623
FUS:269:x:FUS:370	T10	xlink	26.0026	0	27.2867	0	-1.28413	T1	1.87276e-05	0.000144203
FUS:269:x:FUS:370	T11	xlink	26.4174	0	27.2867	0	-0.869309	T1	3.03819e-05	0.000334201
FUS:269:x:FUS:432	T2	xlink	23.7682	0	24.4765	0	-0.708313	T1	0.239098	0.334737
FUS:269:x:FUS:432	T3	xlink	25.2912	0	24.4765	0	0.814774	T1	0.235998	0.39504
FUS:269:x:FUS:432	T4	xlink	25.6684	0	24.4765	0	1.19188	T1	0.0624084	0.192218
FUS:269:x:FUS:432	T5	xlink	25.2844	0	24.4765	0	0.807952	T1	0.178026	0.311546
FUS:269:x:FUS:432	T6	xlink	25.4403	0	24.4765	0	0.963827	T1	0.0644993	0.248322
FUS:269:x:FUS:432	T7	xlink	21.7905	0.125	24.4765	0	-2.68598	T1	0.00497175	0.0246615
FUS:269:x:FUS:432	T8	xlink	24.9173	0	24.4765	0	0.440826	T1	0.581409	0.780971
FUS:269:x:FUS:432	T9	xlink	24.1717	0	24.4765	0	-0.304795	T1	0.45211	0.590042
FUS:269:x:FUS:432	T10	xlink	22.7764	1	24.4765	0	-1.70008	T1	0.00165805	0.00440242
FUS:269:x:FUS:432	T11	xlink	25.0038	0	24.4765	0	0.527354	T1	0.385347	0.478577
FUS:269:x:FUS:453	T2	xlink	21.6992	0.0833333	22.0336	0.333333	-0.334406	T1	0.58469	0.663327
FUS:269:x:FUS:453	T3	xlink	24.328	0	22.0336	0.333333	2.29439	T1	0.0068054	0.0275798
FUS:269:x:FUS:453	T4	xlink	24.9579	0	22.0336	0.333333	2.92425	T1	0.00119422	0.0131365
FUS:269:x:FUS:453	T5	xlink	24.2672	0	22.0336	0.333333	2.23356	T1	0.0053268	0.0179347
FUS:269:x:FUS:453	T6	xlink	23.3612	0.0833333	22.0336	0.333333	1.32763	T1	0.0356354	0.15244
FUS:269:x:FUS:453	T7	xlink	23.1739	1	22.0336	0.333333	1.14029	T1	0.144039	0.237878
FUS:269:x:FUS:453	T8	xlink	25.1064	0	22.0336	0.333333	3.07278	T1	0.00102084	0.0131008
FUS:269:x:FUS:453	T9	xlink	22.9699	0.125	22.0336	0.333333	0.936316	T1	0.305837	0.444329
FUS:269:x:FUS:453	T10	xlink	24.0164	0	22.0336	0.333333	1.98281	T1	0.00928209	0.0166214
FUS:269:x:FUS:453	T11	xlink	24.9294	0	22.0336	0.333333	2.89576	T1	0.000281178	0.00166544
FUS:269:x:FUS:456	T2	xlink	23.1611	0	23.077	0	0.0841294	T1	0.841009	0.875104
FUS:269:x:FUS:456	T3	xlink	24.7712	0	23.077	0	1.69418	T1	0.0157172	0.0504261
FUS:269:x:FUS:456	T4	xlink	25.6973	0	23.077	0	2.62033	T1	0.00167943	0.0161645
FUS:269:x:FUS:456	T5	xlink	25.4424	0	23.077	0	2.36546	T1	0.00328843	0.0126605
FUS:269:x:FUS:456	T6	xlink	24.9791	0	23.077	0	1.90211	T1	0.00796912	0.0511352
FUS:269:x:FUS:456	T7	xlink	24.3053	0	23.077	0	1.22832	T1	0.0855229	0.182924
FUS:269:x:FUS:456	T8	xlink	25.6302	0	23.077	0	2.55326	T1	0.00398395	0.0340849
FUS:269:x:FUS:456	T9	xlink	24.4369	0	23.077	0	1.35996	T1	0.0716565	0.157644
FUS:269:x:FUS:456	T10	xlink	25.4227	0	23.077	0	2.34569	T1	0.00305533	0.00672173
FUS:269:x:FUS:456	T11	xlink	25.8496	0	23.077	0	2.77259	T1	0.00142864	0.00550027
FUS:269:x:FUS:515	T2	xlink	26.5707	0	26.4587	0	0.112039	T1	0.175022	0.269534
FUS:269:x:FUS:515	T3	xlink	26.1544	0	26.4587	0	-0.304254	T1	0.0368223	0.105012
FUS:269:x:FUS:515	T4	xlink	26.6005	0	26.4587	0	0.141804	T1	0.148473	0.333458
FUS:269:x:FUS:515	T5	xlink	26.6311	0	26.4587	0	0.172494	T1	0.204916	0.343012
FUS:269:x:FUS:515	T6	xlink	26.4235	0	26.4587	0	-0.0351615	T1	0.891634	0.933213
FUS:269:x:FUS:515	T7	xlink	26.5047	0	26.4587	0	0.0460778	T1	0.667829	0.745258
FUS:269:x:FUS:515	T8	xlink	26.5811	0	26.4587	0	0.122445	T1	0.202702	0.390202
FUS:269:x:FUS:515	T9	xlink	26.1169	0	26.4587	0	-0.341782	T1	0.00399873	0.0205268
FUS:269:x:FUS:515	T10	xlink	25.8118	0	26.4587	0	-0.646857	T1	0.00148349	0.0042307
FUS:269:x:FUS:515	T11	xlink	26.4844	0	26.4587	0	0.0257198	T1	0.795056	0.887236
FUS:311	T2	monolink	26.47	0	24.3317	1.33333	2.13829	T1	6.56732e-05	0.00182081
FUS:311	T3	monolink	25.8805	0	24.3317	1.33333	1.54875	T1	0.209084	0.38332
FUS:311	T4	monolink	25.7556	0	24.3317	1.33333	1.42388	T1	0.000201323	0.00516729
FUS:311	T5	monolink	22.9622	1.41667	24.3317	1.33333	-1.36953	T1	0.0178578	0.049109
FUS:311	T6	monolink	22.9927	1.5	24.3317	1.33333	-1.339	T1	0.0184277	0.101353
FUS:311	T7	monolink	24.8435	0.25	24.3317	1.33333	0.511713	T1	0.548306	0.670786
FUS:311	T8	monolink	24.527	0	24.3317	1.33333	0.195258	T1	0.572514	0.780971
FUS:311	T9	monolink	24.0407	2	24.3317	1.33333	-0.291018	T1	0.311642	0.444378
FUS:311	T10	monolink	23.6817	1.5	24.3317	1.33333	-0.650088	T1	0.254608	0.301613
FUS:311	T11	monolink	24.1903	1.33333	24.3317	1.33333	-0.141415	T1	0.7339	0.843437
FUS:317	T2	monolink	27.7156	0	27.9395	0	-0.223864	T1	0.407739	0.506385
FUS:317	T3	monolink	26.1162	0	27.9395	0	-1.82332	T1	0.000147457	0.0010322
FUS:317	T4	monolink	27.4077	0	27.9395	0	-0.531806	T1	0.55512	0.685101
FUS:317	T5	monolink	29.0376	0	27.9395	0	1.09807	T1	0.000628518	0.00456026
FUS:317	T6	monolink	28.063	0	27.9395	0	0.123528	T1	0.83998	0.933213
FUS:317	T7	monolink	28.9115	0	27.9395	0	0.971968	T1	0.00775355	0.0280355
FUS:317	T8	monolink	28.6307	0	27.9395	0	0.691194	T1	0.0444381	0.16294
FUS:317	T9	monolink	29.6462	0	27.9395	0	1.70671	T1	0.00037972	0.00333469
FUS:317	T10	monolink	29.8179	0	27.9395	0	1.87842	T1	4.94538e-05	0.000271996
FUS:317	T11	monolink	29.0731	0	27.9395	0	1.1336	T1	0.000468607	0.00212252
FUS:317:x:FUS:320	T2	looplink	22.568	1	21.8932	0.75	0.674751	T1	0.585795	0.663327
FUS:317:x:FUS:320	T3	looplink	22.6871	1	21.8932	0.75	0.793914	T1	0.360591	0.548034
FUS:317:x:FUS:320	T4	looplink	23.0469	1	21.8932	0.75	1.15364	T1	0.195176	0.373314
FUS:317:x:FUS:320	T5	looplink	21.983	0	21.8932	0.75	0.0897888	T1	0.701608	0.806326
FUS:317:x:FUS:320	T6	looplink	22.8421	1	21.8932	0.75	0.948865	T1	0.286953	0.491009
FUS:317:x:FUS:320	T7	looplink	22.2432	1	21.8932	0.75	0.350016	T1	0.732323	0.805556
FUS:317:x:FUS:320	T8	looplink	22.9938	1	21.8932	0.75	1.10056	T1	0.196986	0.38892
FUS:317:x:FUS:320	T9	looplink	23.7829	0	21.8932	0.75	1.88963	T1	0.0257604	0.0719089
FUS:317:x:FUS:320	T10	looplink	20.6039	0	21.8932	0.75	-1.28933	T1	0.020806	0.0340864
FUS:317:x:FUS:320	T11	looplink	22.7373	1	21.8932	0.75	0.844095	T1	0.394869	0.482618
FUS:317:x:FUS:321	T2	xlink	33.8718	0	34.4758	0	-0.603987	T1	0.000571054	0.00732853
FUS:317:x:FUS:321	T3	xlink	33.6671	0	34.4758	0	-0.808676	T1	6.19512e-05	0.000626855
FUS:317:x:FUS:321	T4	xlink	33.7291	0	34.4758	0	-0.746702	T1	0.000670602	0.0108334
FUS:317:x:FUS:321	T5	xlink	33.8526	0	34.4758	0	-0.623217	T1	5.58779e-05	0.00107565
FUS:317:x:FUS:321	T6	xlink	34.1189	0	34.4758	0	-0.356842	T1	0.00243433	0.0312405
FUS:317:x:FUS:321	T7	xlink	33.8117	0	34.4758	0	-0.664125	T1	7.04088e-05	0.00180716
FUS:317:x:FUS:321	T8	xlink	33.8784	0	34.4758	0	-0.59737	T1	0.000262031	0.0115761
FUS:317:x:FUS:321	T9	xlink	34.0333	0	34.4758	0	-0.442442	T1	0.00310677	0.0170933
FUS:317:x:FUS:321	T10	xlink	33.5676	0	34.4758	0	-0.908228	T1	1.6618e-05	0.000144203
FUS:317:x:FUS:321	T11	xlink	33.5519	0	34.4758	0	-0.923914	T1	2.63998e-07	5.08196e-06
FUS:317:x:FUS:337	T2	xlink	25.0027	0	24.5082	0	0.494492	T1	0.115644	0.18946
FUS:317:x:FUS:337	T3	xlink	24.1592	0	24.5082	0	-0.349059	T1	0.229162	0.39504
FUS:317:x:FUS:337	T4	xlink	22.9661	0	24.5082	0	-1.54215	T1	0.160813	0.34396
FUS:317:x:FUS:337	T5	xlink	22.7482	1	24.5082	0	-1.75999	T1	0.000143927	0.00221648
FUS:317:x:FUS:337	T6	xlink	22.3317	0	24.5082	0	-2.17648	T1	0.00184822	0.0312405
FUS:317:x:FUS:337	T7	xlink	24.6	0	24.5082	0	0.091789	T1	0.833719	0.879403
FUS:317:x:FUS:337	T8	xlink	22.32	0	24.5082	0	-2.18819	T1	0.000547687	0.0115761
FUS:317:x:FUS:337	T9	xlink	22.6721	0	24.5082	0	-1.8361	T1	0.00029351	0.00322861
FUS:317:x:FUS:337	T10	xlink	19.69	0.166667	24.5082	0	-4.81824	T1	5.63587e-05	0.00027897
FUS:317:x:FUS:337	T11	xlink	22.7085	1	24.5082	0	-1.79968	T1	1.19026e-05	0.000183301
FUS:317:x:FUS:339	T2	xlink	27.0729	0	27.6075	0	-0.534667	T1	0.0122776	0.03768
FUS:317:x:FUS:339	T3	xlink	26.841	0	27.6075	0	-0.766557	T1	4.02377e-06	0.00030983
FUS:317:x:FUS:339	T4	xlink	26.8562	0	27.6075	0	-0.751343	T1	0.0300109	0.11004
FUS:317:x:FUS:339	T5	xlink	27.1771	0	27.6075	0	-0.430382	T1	0.00416101	0.015257
FUS:317:x:FUS:339	T6	xlink	27.3864	0	27.6075	0	-0.221139	T1	0.177234	0.359132
FUS:317:x:FUS:339	T7	xlink	27.5022	0	27.6075	0	-0.105311	T1	0.156228	0.241121
FUS:317:x:FUS:339	T8	xlink	27.3762	0	27.6075	0	-0.231313	T1	0.038411	0.152151
FUS:317:x:FUS:339	T9	xlink	27.5415	0	27.6075	0	-0.0660587	T1	0.573162	0.71183
FUS:317:x:FUS:339	T10	xlink	27.8034	0	27.6075	0	0.195862	T1	0.112149	0.141565
FUS:317:x:FUS:339	T11	xlink	27.3677	0	27.6075	0	-0.239839	T1	0.0244254	0.0537358
FUS:317:x:FUS:362	T2	xlink	27.3691	0	28.0904	0	-0.721236	T1	0.00265115	0.0145813
FUS:317:x:FUS:362	T3	xlink	27.566	0	28.0904	0	-0.524336	T1	0.0222627	0.068569
FUS:317:x:FUS:362	T4	xlink	27.714	0	28.0904	0	-0.376319	T1	0.0838611	0.222666
FUS:317:x:FUS:362	T5	xlink	27.9473	0	28.0904	0	-0.143098	T1	0.385939	0.560703
FUS:317:x:FUS:362	T6	xlink	28.4188	0	28.0904	0	0.328413	T1	0.131998	0.327865
FUS:317:x:FUS:362	T7	xlink	27.9323	0	28.0904	0	-0.158076	T1	0.396469	0.526347
FUS:317:x:FUS:362	T8	xlink	28.2748	0	28.0904	0	0.184412	T1	0.323483	0.553515
FUS:317:x:FUS:362	T9	xlink	28.5299	0	28.0904	0	0.439563	T1	0.0350694	0.0871078
FUS:317:x:FUS:362	T10	xlink	28.4805	0	28.0904	0	0.390134	T1	0.0189326	0.0316916
FUS:317:x:FUS:362	T11	xlink	28.4794	0	28.0904	0	0.389062	T1	0.0454484	0.083322
FUS:317:x:FUS:370	T2	xlink	25.4506	0	25.3909	0	0.0596915	T1	0.688961	0.747026
FUS:317:x:FUS:370	T3	xlink	24.9623	0	25.3909	0	-0.428542	T1	0.00905777	0.0317022
FUS:317:x:FUS:370	T4	xlink	25.3381	0	25.3909	0	-0.0528164	T1	0.697965	0.778888
FUS:317:x:FUS:370	T5	xlink	25.6105	0	25.3909	0	0.219671	T1	0.0650133	0.135298
FUS:317:x:FUS:370	T6	xlink	25.566	0	25.3909	0	0.175147	T1	0.258566	0.452491
FUS:317:x:FUS:370	T7	xlink	25.8996	0	25.3909	0	0.508769	T1	0.00352899	0.0209025
FUS:317:x:FUS:370	T8	xlink	25.3374	0	25.3909	0	-0.0534353	T1	0.805012	0.898346
FUS:317:x:FUS:370	T9	xlink	25.8105	0	25.3909	0	0.419594	T1	0.0148719	0.0520516
FUS:317:x:FUS:370	T10	xlink	25.2148	0	25.3909	0	-0.176032	T1	0.370575	0.41354
FUS:317:x:FUS:370	T11	xlink	25.3539	0	25.3909	0	-0.0370146	T1	0.772539	0.874787
FUS:317:x:FUS:432	T2	xlink	24.8048	0	25.7693	0	-0.964513	T1	0.0153652	0.0426196
FUS:317:x:FUS:432	T3	xlink	25.6739	0	25.7693	0	-0.095448	T1	0.816813	0.849927
FUS:317:x:FUS:432	T4	xlink	25.9607	0	25.7693	0	0.191409	T1	0.676396	0.765919
FUS:317:x:FUS:432	T5	xlink	25.2282	0	25.7693	0	-0.541118	T1	0.268535	0.413544
FUS:317:x:FUS:432	T6	xlink	25.9961	0	25.7693	0	0.226755	T1	0.549041	0.778092
FUS:317:x:FUS:432	T7	xlink	24.296	0	25.7693	0	-1.4733	T1	0.00795708	0.0280355
FUS:317:x:FUS:432	T8	xlink	25.7057	0	25.7693	0	-0.0635579	T1	0.878358	0.940045
FUS:317:x:FUS:432	T9	xlink	25.3618	0	25.7693	0	-0.407548	T1	0.351091	0.491527
FUS:317:x:FUS:432	T10	xlink	23.3078	0.0833333	25.7693	0	-2.46155	T1	0.00439934	0.00891444
FUS:317:x:FUS:432	T11	xlink	24.6115	0	25.7693	0	-1.15781	T1	0.0783909	0.128428
FUS:317:x:FUS:453	T2	xlink	24.3486	0	25.2211	0	-0.872508	T1	0.00646937	0.0259548
FUS:317:x:FUS:453	T3	xlink	24.9739	0	25.2211	0	-0.247195	T1	0.362984	0.548034
FUS:317:x:FUS:453	T4	xlink	24.9599	0	25.2211	0	-0.261227	T1	0.257654	0.396788
FUS:317:x:FUS:453	T5	xlink	24.5394	0	25.2211	0	-0.68168	T1	0.0590019	0.129804
FUS:317:x:FUS:453	T6	xlink	24.8883	0	25.2211	0	-0.332822	T1	0.168887	0.359132
FUS:317:x:FUS:453	T7	xlink	24.8639	0	25.2211	0	-0.357208	T1	0.147658	0.237878
FUS:317:x:FUS:453	T8	xlink	25.3268	0	25.2211	0	0.105674	T1	0.638426	0.805882
FUS:317:x:FUS:453	T9	xlink	24.9175	0	25.2211	0	-0.303674	T1	0.231876	0.371968
FUS:317:x:FUS:453	T10	xlink	24.6894	0	25.2211	0	-0.531707	T1	0.0774624	0.102673
FUS:317:x:FUS:453	T11	xlink	24.8073	0	25.2211	0	-0.413813	T1	0.090216	0.138933
FUS:317:x:FUS:456	T2	xlink	25.0388	0	25.8726	0	-0.833753	T1	0.0127231	0.03768
FUS:317:x:FUS:456	T3	xlink	25.2954	0	25.8726	0	-0.577188	T1	0.145594	0.287455
FUS:317:x:FUS:456	T4	xlink	25.9452	0	25.8726	0	0.0725503	T1	0.845577	0.900105
FUS:317:x:FUS:456	T5	xlink	26.0241	0	25.8726	0	0.151511	T1	0.528266	0.677941
FUS:317:x:FUS:456	T6	xlink	26.0151	0	25.8726	0	0.142507	T1	0.548768	0.778092
FUS:317:x:FUS:456	T7	xlink	25.7291	0	25.8726	0	-0.143529	T1	0.554587	0.670786
FUS:317:x:FUS:456	T8	xlink	26.2378	0	25.8726	0	0.365237	T1	0.211039	0.396341
FUS:317:x:FUS:456	T9	xlink	25.9396	0	25.8726	0	0.0670323	T1	0.844179	0.885203
FUS:317:x:FUS:456	T10	xlink	26.114	0	25.8726	0	0.241379	T1	0.328065	0.37703
FUS:317:x:FUS:456	T11	xlink	26.1727	0	25.8726	0	0.30005	T1	0.218911	0.294341
FUS:317:x:FUS:515	T2	xlink	26.0965	0	26.7122	0	-0.615698	T1	0.00491488	0.0222615
FUS:317:x:FUS:515	T3	xlink	25.7266	0	26.7122	0	-0.985537	T1	0.000137225	0.0010322
FUS:317:x:FUS:515	T4	xlink	26.118	0	26.7122	0	-0.594188	T1	0.00243798	0.0170658
FUS:317:x:FUS:515	T5	xlink	26.0536	0	26.7122	0	-0.65859	T1	0.000262639	0.00288902
FUS:317:x:FUS:515	T6	xlink	26.6637	0	26.7122	0	-0.0484677	T1	0.765953	0.933213
FUS:317:x:FUS:515	T7	xlink	26.3885	0	26.7122	0	-0.323651	T1	0.136516	0.236782
FUS:317:x:FUS:515	T8	xlink	26.6431	0	26.7122	0	-0.0690696	T1	0.664823	0.824748
FUS:317:x:FUS:515	T9	xlink	26.5245	0	26.7122	0	-0.187697	T1	0.274186	0.422246
FUS:317:x:FUS:515	T10	xlink	25.7891	0	26.7122	0	-0.923086	T1	3.51817e-05	0.000208384
FUS:317:x:FUS:515	T11	xlink	26.3569	0	26.7122	0	-0.355306	T1	0.0328502	0.0632367
FUS:320	T2	monolink	27.636	0	27.9386	0	-0.302575	T1	0.290943	0.373377
FUS:320	T3	monolink	25.858	0	27.9386	0	-2.08062	T1	6.51278e-05	0.000626855
FUS:320	T4	monolink	27.348	0	27.9386	0	-0.590649	T1	0.526706	0.685101
FUS:320	T5	monolink	29.0376	0	27.9386	0	1.09896	T1	0.00062963	0.00456026
FUS:320	T6	monolink	28.0616	0	27.9386	0	0.12296	T1	0.840783	0.933213
FUS:320	T7	monolink	28.9017	0	27.9386	0	0.96312	T1	0.00801013	0.0280355
FUS:320	T8	monolink	28.6205	0	27.9386	0	0.681886	T1	0.0479513	0.16783
FUS:320	T9	monolink	29.6424	0	27.9386	0	1.70379	T1	0.000389769	0.00333469
FUS:320	T10	monolink	29.5199	0	27.9386	0	1.58129	T1	0.000225431	0.00091359
FUS:320	T11	monolink	29.0843	0	27.9386	0	1.14574	T1	0.000441362	0.00212252
FUS:320:x:FUS:321	T2	looplink	28.1954	0	28.5493	0	-0.353888	T1	0.0615779	0.115646
FUS:320:x:FUS:321	T3	looplink	26.6814	0	28.5493	0	-1.86785	T1	5.62491e-05	0.000626855
FUS:320:x:FUS:321	T4	looplink	27.4725	0	28.5493	0	-1.07674	T1	0.221853	0.38619
FUS:320:x:FUS:321	T5	looplink	28.1149	0	28.5493	0	-0.434343	T1	0.619914	0.745834
FUS:320:x:FUS:321	T6	looplink	28.2032	0	28.5493	0	-0.34606	T1	0.557387	0.778092
FUS:320:x:FUS:321	T7	looplink	28.9883	0	28.5493	0	0.439069	T1	0.0151196	0.0401452
FUS:320:x:FUS:321	T8	looplink	29.4296	0	28.5493	0	0.880309	T1	0.000595693	0.0115761
FUS:320:x:FUS:321	T9	looplink	29.9148	0	28.5493	0	1.36554	T1	1.38126e-05	0.00090554
FUS:320:x:FUS:321	T10	looplink	28.9387	0	28.5493	0	0.389466	T1	0.0134608	0.0235565
FUS:320:x:FUS:321	T11	looplink	28.819	0	28.5493	0	0.269736	T1	0.0622484	0.108935
FUS:320:x:FUS:515	T2	xlink	23.1849	0	24.4023	0	-1.21738	T1	0.000977393	0.00940741
FUS:320:x:FUS:515	T3	xlink	23.3116	0	24.4023	0	-1.0907	T1	4.02187e-05	0.000626855
FUS:320:x:FUS:515	T4	xlink	23.4118	0	24.4023	0	-0.9905	T1	3.55822e-05	0.00136992
FUS:320:x:FUS:515	T5	xlink	22.9234	0	24.4023	0	-1.47887	T1	0.000232212	0.00288902
FUS:320:x:FUS:515	T6	xlink	24.1291	0	24.4023	0	-0.273152	T1	0.176388	0.359132
FUS:320:x:FUS:515	T7	xlink	23.148	0	24.4023	0	-1.25431	T1	0.137512	0.236782
FUS:320:x:FUS:515	T8	xlink	24.062	0	24.4023	0	-0.340294	T1	0.032795	0.14029
FUS:320:x:FUS:515	T9	xlink	23.6229	0	24.4023	0	-0.779419	T1	0.000237375	0.00304631
FUS:320:x:FUS:515	T10	xlink	24.1828	0	24.4023	0	-0.219487	T1	0.0696144	0.0992649
FUS:320:x:FUS:515	T11	xlink	23.8225	0	24.4023	0	-0.579752	T1	0.005854	0.0155434
FUS:321	T2	monolink	31.1539	0	31.085	0	0.068888	T1	0.698517	0.747026
FUS:321	T3	monolink	30.7069	0	31.085	0	-0.378167	T1	0.0513482	0.131794
FUS:321	T4	monolink	31.075	0	31.085	0	-0.0100191	T1	0.985822	0.985822
FUS:321	T5	monolink	31.7149	0	31.085	0	0.629911	T1	0.00321902	0.0126605
FUS:321	T6	monolink	31.587	0	31.085	0	0.501934	T1	0.150411	0.345132
FUS:321	T7	monolink	31.9386	0	31.085	0	0.853625	T1	0.000753131	0.00724888
FUS:321	T8	monolink	31.9042	0	31.085	0	0.819144	T1	0.000601355	0.0115761
FUS:321	T9	monolink	32.1358	0	31.085	0	1.0508	T1	0.000128531	0.00304631
FUS:321	T10	monolink	32.9803	0	31.085	0	1.89529	T1	6.90614e-08	2.65886e-06
FUS:321	T11	monolink	32.894	0	31.085	0	1.809	T1	5.97878e-08	1.53455e-06
FUS:321:x:FUS:337	T2	xlink	26.069	0	25.9016	0	0.167446	T1	0.576577	0.663327
FUS:321:x:FUS:337	T3	xlink	25.8423	0	25.9016	0	-0.0592966	T1	0.491291	0.591285
FUS:321:x:FUS:337	T4	xlink	25.9768	0	25.9016	0	0.0752589	T1	0.925139	0.937312
FUS:321:x:FUS:337	T5	xlink	25.3552	0	25.9016	0	-0.546337	T1	0.00559005	0.0179347
FUS:321:x:FUS:337	T6	xlink	27.2582	0	25.9016	0	1.35666	T1	0.000677355	0.0312405
FUS:321:x:FUS:337	T7	xlink	25.8909	0	25.9016	0	-0.0106609	T1	0.817256	0.87401
FUS:321:x:FUS:337	T8	xlink	26.3859	0	25.9016	0	0.484347	T1	0.0713043	0.189325
FUS:321:x:FUS:337	T9	xlink	26.338	0	25.9016	0	0.436435	T1	0.0941117	0.195854
FUS:321:x:FUS:337	T10	xlink	26.19	0	25.9016	0	0.288387	T1	0.440894	0.471511
FUS:321:x:FUS:337	T11	xlink	26.4316	0	25.9016	0	0.529997	T1	0.00568909	0.0155434
FUS:321:x:FUS:339	T2	xlink	27.7457	0	28.36	0	-0.614294	T1	0.00605134	0.0258863
FUS:321:x:FUS:339	T3	xlink	28.1999	0	28.36	0	-0.16006	T1	0.448541	0.584014
FUS:321:x:FUS:339	T4	xlink	27.9784	0	28.36	0	-0.381655	T1	0.104178	0.259226
FUS:321:x:FUS:339	T5	xlink	28.0975	0	28.36	0	-0.262465	T1	0.13386	0.24541
FUS:321:x:FUS:339	T6	xlink	28.2915	0	28.36	0	-0.0684977	T1	0.664223	0.881814
FUS:321:x:FUS:339	T7	xlink	28.1085	0	28.36	0	-0.251512	T1	0.191191	0.279468
FUS:321:x:FUS:339	T8	xlink	28.3538	0	28.36	0	-0.00623086	T1	0.964346	0.968343
FUS:321:x:FUS:339	T9	xlink	28.3588	0	28.36	0	-0.00124719	T1	0.986365	0.994219
FUS:321:x:FUS:339	T10	xlink	28.0306	0	28.36	0	-0.32945	T1	0.0755264	0.102673
FUS:321:x:FUS:339	T11	xlink	27.9739	0	28.36	0	-0.38606	T1	0.0531864	0.0952408
FUS:321:x:FUS:362	T2	xlink	28.1093	0	28.7765	0	-0.667145	T1	0.00868928	0.0304125
FUS:321:x:FUS:362	T3	xlink	28.6785	0	28.7765	0	-0.0979332	T1	0.71507	0.775498
FUS:321:x:FUS:362	T4	xlink	28.3814	0	28.7765	0	-0.395117	T1	0.203626	0.373314
FUS:321:x:FUS:362	T5	xlink	28.635	0	28.7765	0	-0.141448	T1	0.57297	0.723257
FUS:321:x:FUS:362	T6	xlink	29.072	0	28.7765	0	0.295489	T1	0.152396	0.345132
FUS:321:x:FUS:362	T7	xlink	28.353	0	28.7765	0	-0.42348	T1	0.105139	0.202393
FUS:321:x:FUS:362	T8	xlink	28.952	0	28.7765	0	0.175509	T1	0.481151	0.771846
FUS:321:x:FUS:362	T9	xlink	29.124	0	28.7765	0	0.347552	T1	0.165723	0.290016
FUS:321:x:FUS:362	T10	xlink	28.8079	0	28.7765	0	0.031398	T1	0.875332	0.886849
FUS:321:x:FUS:362	T11	xlink	28.941	0	28.7765	0	0.164517	T1	0.520577	0.616683
FUS:321:x:FUS:370	T2	xlink	26.2899	0	26.0432	0	0.246776	T1	0.438357	0.53577
FUS:321:x:FUS:370	T3	xlink	26.7352	0	26.0432	0	0.692046	T1	0.0436558	0.120053
FUS:321:x:FUS:370	T4	xlink	26.4449	0	26.0432	0	0.401736	T1	0.198819	0.373314
FUS:321:x:FUS:370	T5	xlink	26.6378	0	26.0432	0	0.594673	T1	0.0371887	0.0923719
FUS:321:x:FUS:370	T6	xlink	26.6775	0	26.0432	0	0.63429	T1	0.0313631	0.146326
FUS:321:x:FUS:370	T7	xlink	26.4419	0	26.0432	0	0.398774	T1	0.197251	0.281266
FUS:321:x:FUS:370	T8	xlink	26.4629	0	26.0432	0	0.419709	T1	0.172496	0.363558
FUS:321:x:FUS:370	T9	xlink	26.6035	0	26.0432	0	0.560364	T1	0.0712754	0.157644
FUS:321:x:FUS:370	T10	xlink	25.264	0	26.0432	0	-0.77915	T1	0.00305475	0.00672173
FUS:321:x:FUS:370	T11	xlink	25.6195	0	26.0432	0	-0.423714	T1	0.0826374	0.132564
FUS:321:x:FUS:432	T2	xlink	25.434	0	26.5786	0	-1.14466	T1	0.0558132	0.110195
FUS:321:x:FUS:432	T3	xlink	27.1413	0	26.5786	0	0.562718	T1	0.433805	0.584014
FUS:321:x:FUS:432	T4	xlink	27.1721	0	26.5786	0	0.593466	T1	0.377677	0.548701
FUS:321:x:FUS:432	T5	xlink	26.7121	0	26.5786	0	0.13352	T1	0.848915	0.90924
FUS:321:x:FUS:432	T6	xlink	26.9517	0	26.5786	0	0.373081	T1	0.496145	0.749081
FUS:321:x:FUS:432	T7	xlink	25.1573	0	26.5786	0	-1.42129	T1	0.0910461	0.188311
FUS:321:x:FUS:432	T8	xlink	27.0416	0	26.5786	0	0.463012	T1	0.532268	0.780971
FUS:321:x:FUS:432	T9	xlink	26.4793	0	26.5786	0	-0.0993017	T1	0.850714	0.885203
FUS:321:x:FUS:432	T10	xlink	24.5881	0	26.5786	0	-1.99056	T1	0.00721818	0.013895
FUS:321:x:FUS:432	T11	xlink	25.8599	0	26.5786	0	-0.718745	T1	0.225899	0.294818
FUS:321:x:FUS:453	T2	xlink	26.2633	0	26.4852	0	-0.22188	T1	0.502575	0.604661
FUS:321:x:FUS:453	T3	xlink	27.1039	0	26.4852	0	0.618741	T1	0.18221	0.350754
FUS:321:x:FUS:453	T4	xlink	26.9781	0	26.4852	0	0.492917	T1	0.250568	0.39375
FUS:321:x:FUS:453	T5	xlink	26.3821	0	26.4852	0	-0.1031	T1	0.797131	0.876844
FUS:321:x:FUS:453	T6	xlink	26.8976	0	26.4852	0	0.412425	T1	0.256956	0.452491
FUS:321:x:FUS:453	T7	xlink	26.2579	0	26.4852	0	-0.227301	T1	0.592382	0.670786
FUS:321:x:FUS:453	T8	xlink	26.7475	0	26.4852	0	0.262363	T1	0.536946	0.780971
FUS:321:x:FUS:453	T9	xlink	26.1239	0	26.4852	0	-0.361296	T1	0.385612	0.530217
FUS:321:x:FUS:453	T10	xlink	21.6333	0.166667	26.4852	0	-4.85186	T1	6.29249e-06	8.07536e-05
FUS:321:x:FUS:453	T11	xlink	24.4756	0	26.4852	0	-2.00958	T1	0.00533868	0.0152251
FUS:321:x:FUS:456	T2	xlink	26.8688	0	27.1818	0	-0.31304	T1	0.276142	0.362837
FUS:321:x:FUS:456	T3	xlink	27.8335	0	27.1818	0	0.651668	T1	0.113568	0.241091
FUS:321:x:FUS:456	T4	xlink	27.7617	0	27.1818	0	0.579862	T1	0.123318	0.296734
FUS:321:x:FUS:456	T5	xlink	27.3852	0	27.1818	0	0.203374	T1	0.456961	0.606655
FUS:321:x:FUS:456	T6	xlink	27.4933	0	27.1818	0	0.311488	T1	0.321348	0.526518
FUS:321:x:FUS:456	T7	xlink	26.9638	0	27.1818	0	-0.218043	T1	0.56998	0.670786
FUS:321:x:FUS:456	T8	xlink	27.7418	0	27.1818	0	0.559981	T1	0.152577	0.345542
FUS:321:x:FUS:456	T9	xlink	27.0652	0	27.1818	0	-0.116626	T1	0.719294	0.814495
FUS:321:x:FUS:456	T10	xlink	24.9331	0	27.1818	0	-2.2487	T1	3.3224e-05	0.000208384
FUS:321:x:FUS:456	T11	xlink	25.8567	0	27.1818	0	-1.32518	T1	0.0262109	0.055306
FUS:321:x:FUS:515	T2	xlink	27.0197	0	27.6535	0	-0.633776	T1	0.00128922	0.00992697
FUS:321:x:FUS:515	T3	xlink	27.0589	0	27.6535	0	-0.594568	T1	0.00371501	0.0190704
FUS:321:x:FUS:515	T4	xlink	27.3355	0	27.6535	0	-0.318008	T1	0.132913	0.310131
FUS:321:x:FUS:515	T5	xlink	27.5274	0	27.6535	0	-0.126023	T1	0.398173	0.563622
FUS:321:x:FUS:515	T6	xlink	27.6709	0	27.6535	0	0.0174754	T1	0.886938	0.933213
FUS:321:x:FUS:515	T7	xlink	26.6625	0	27.6535	0	-0.991006	T1	0.000747838	0.00724888
FUS:321:x:FUS:515	T8	xlink	27.3228	0	27.6535	0	-0.330681	T1	0.147014	0.343032
FUS:321:x:FUS:515	T9	xlink	26.4218	0	27.6535	0	-1.23169	T1	0.00115093	0.00738513
FUS:321:x:FUS:515	T10	xlink	26.8632	0	27.6535	0	-0.790245	T1	0.0003101	0.00119389
FUS:321:x:FUS:515	T11	xlink	27.4303	0	27.6535	0	-0.223199	T1	0.178171	0.244984
FUS:337	T2	monolink	31.135	0	31.2504	0	-0.115397	T1	0.749393	0.790456
FUS:337	T3	monolink	30.9118	0	31.2504	0	-0.338619	T1	0.235936	0.39504
FUS:337	T4	monolink	31.5087	0	31.2504	0	0.258235	T1	0.51222	0.685101
FUS:337	T5	monolink	30.8441	0	31.2504	0	-0.406368	T1	0.0430968	0.100559
FUS:337	T6	monolink	31.5521	0	31.2504	0	0.30164	T1	0.244236	0.447766
FUS:337	T7	monolink	31.5434	0	31.2504	0	0.292934	T1	0.366598	0.495228
FUS:337	T8	monolink	31.6302	0	31.2504	0	0.37975	T1	0.193624	0.38892
FUS:337	T9	monolink	32.024	0	31.2504	0	0.773565	T1	0.0265442	0.0719089
FUS:337	T10	monolink	32.2927	0	31.2504	0	1.04223	T1	0.00193193	0.00464872
FUS:337	T11	monolink	32.0557	0	31.2504	0	0.805301	T1	0.00742444	0.0190561
FUS:337:x:FUS:339	T2	looplink	30.5175	0	29.9762	0	0.541354	T1	0.0710856	0.127293
FUS:337:x:FUS:339	T3	looplink	29.9582	0	29.9762	0	-0.017938	T1	0.453053	0.584014
FUS:337:x:FUS:339	T4	looplink	30.2015	0	29.9762	0	0.225386	T1	0.386927	0.55173
FUS:337:x:FUS:339	T5	looplink	29.9568	0	29.9762	0	-0.0193938	T1	0.619686	0.745834
FUS:337:x:FUS:339	T6	looplink	30.5593	0	29.9762	0	0.583101	T1	0.0469902	0.190434
FUS:337:x:FUS:339	T7	looplink	31.2345	0	29.9762	0	1.25831	T1	0.000656588	0.00724888
FUS:337:x:FUS:339	T8	looplink	30.5674	0	29.9762	0	0.591284	T1	0.0147193	0.0944486
FUS:337:x:FUS:339	T9	looplink	31.0392	0	29.9762	0	1.06305	T1	0.000235773	0.00304631
FUS:337:x:FUS:339	T10	looplink	29.9579	0	29.9762	0	-0.0182238	T1	0.865419	0.886849
FUS:337:x:FUS:339	T11	looplink	29.9038	0	29.9762	0	-0.0723567	T1	0.886909	0.961859
FUS:337:x:FUS:339	T2	xlink	26.5776	0	27.1219	0	-0.544213	T1	0.00116528	0.00992697
FUS:337:x:FUS:339	T3	xlink	26.244	0	27.1219	0	-0.877881	T1	3.55366e-05	0.000626855
FUS:337:x:FUS:339	T4	xlink	26.5339	0	27.1219	0	-0.587939	T1	0.0614924	0.192218
FUS:337:x:FUS:339	T5	xlink	26.3007	0	27.1219	0	-0.821183	T1	0.0165005	0.047057
FUS:337:x:FUS:339	T6	xlink	26.7125	0	27.1219	0	-0.409353	T1	0.0323058	0.146326
FUS:337:x:FUS:339	T7	xlink	27.1188	0	27.1219	0	-0.00304432	T1	0.937868	0.95432
FUS:337:x:FUS:339	T8	xlink	26.5856	0	27.1219	0	-0.536245	T1	0.0142541	0.0944486
FUS:337:x:FUS:339	T9	xlink	27.0472	0	27.1219	0	-0.0746183	T1	0.506411	0.63924
FUS:337:x:FUS:339	T10	xlink	25.6914	0	27.1219	0	-1.43048	T1	2.47779e-06	4.80124e-05
FUS:337:x:FUS:339	T11	xlink	25.4881	0	27.1219	0	-1.6338	T1	1.33149e-08	5.12625e-07
FUS:337:x:FUS:362	T2	xlink	26.8894	0	26.879	0	0.0104407	T1	0.962822	0.975491
FUS:337:x:FUS:362	T3	xlink	27.1482	0	26.879	0	0.269209	T1	0.115849	0.241091
FUS:337:x:FUS:362	T4	xlink	26.9229	0	26.879	0	0.043925	T1	0.537393	0.685101
FUS:337:x:FUS:362	T5	xlink	26.8583	0	26.879	0	-0.0207099	T1	0.886757	0.922706
FUS:337:x:FUS:362	T6	xlink	27.129	0	26.879	0	0.250014	T1	0.103046	0.305173
FUS:337:x:FUS:362	T7	xlink	26.9588	0	26.879	0	0.0797939	T1	0.584308	0.670786
FUS:337:x:FUS:362	T8	xlink	26.9585	0	26.879	0	0.0795386	T1	0.591269	0.780971
FUS:337:x:FUS:362	T9	xlink	27.2757	0	26.879	0	0.396735	T1	0.0161829	0.0541774
FUS:337:x:FUS:362	T10	xlink	25.7187	0	26.879	0	-1.16033	T1	0.000200958	0.000859654
FUS:337:x:FUS:362	T11	xlink	26.1762	0	26.879	0	-0.70279	T1	0.0180469	0.0434253
FUS:337:x:FUS:370	T2	xlink	29.032	0	29.2869	0	-0.254879	T1	0.0841616	0.140879
FUS:337:x:FUS:370	T3	xlink	28.6221	0	29.2869	0	-0.664836	T1	5.46939e-05	0.000626855
FUS:337:x:FUS:370	T4	xlink	28.8477	0	29.2869	0	-0.439238	T1	0.00404604	0.0259621
FUS:337:x:FUS:370	T5	xlink	28.8414	0	29.2869	0	-0.445524	T1	0.00161003	0.00774829
FUS:337:x:FUS:370	T6	xlink	28.9115	0	29.2869	0	-0.375426	T1	0.00605963	0.0460321
FUS:337:x:FUS:370	T7	xlink	29.2733	0	29.2869	0	-0.0136224	T1	0.882638	0.918421
FUS:337:x:FUS:370	T8	xlink	29.0135	0	29.2869	0	-0.273371	T1	0.0279298	0.134412
FUS:337:x:FUS:370	T9	xlink	29.1931	0	29.2869	0	-0.093818	T1	0.254105	0.399308
FUS:337:x:FUS:370	T10	xlink	27.2135	0	29.2869	0	-2.07337	T1	7.5824e-10	5.83845e-08
FUS:337:x:FUS:370	T11	xlink	27.1021	0	29.2869	0	-2.18482	T1	2.52175e-09	1.94174e-07
FUS:337:x:FUS:432	T2	xlink	23.8874	0.0833333	24.7447	0	-0.857302	T1	0.278018	0.362837
FUS:337:x:FUS:432	T3	xlink	25.7062	0	24.7447	0	0.961509	T1	0.233637	0.39504
FUS:337:x:FUS:432	T4	xlink	25.3012	0	24.7447	0	0.556482	T1	0.535308	0.685101
FUS:337:x:FUS:432	T5	xlink	22.609	0	24.7447	0	-2.13571	T1	0.0615096	0.131562
FUS:337:x:FUS:432	T6	xlink	25.8298	0	24.7447	0	1.08506	T1	0.122398	0.316661
FUS:337:x:FUS:432	T7	xlink	22.5177	0.125	24.7447	0	-2.22702	T1	0.00872294	0.0292029
FUS:337:x:FUS:432	T8	xlink	23.8792	0	24.7447	0	-0.865539	T1	0.292089	0.511156
FUS:337:x:FUS:432	T9	xlink	22.9084	1	24.7447	0	-1.83625	T1	0.0195899	0.062851
FUS:337:x:FUS:432	T10	xlink	22.7586	1	24.7447	0	-1.98612	T1	0.00338772	0.00707985
FUS:337:x:FUS:432	T11	xlink	22.478	1	24.7447	0	-2.26669	T1	0.00188784	0.00632016
FUS:337:x:FUS:456	T2	xlink	23.2099	0	23.9791	0	-0.769169	T1	0.0332041	0.0798973
FUS:337:x:FUS:456	T3	xlink	23.0714	0	23.9791	0	-0.907695	T1	0.0312249	0.0924736
FUS:337:x:FUS:456	T4	xlink	23.8832	0	23.9791	0	-0.0958722	T1	0.545452	0.685101
FUS:337:x:FUS:456	T5	xlink	24.0225	0	23.9791	0	0.0434728	T1	0.64935	0.769229
FUS:337:x:FUS:456	T6	xlink	22.9625	0	23.9791	0	-1.01662	T1	0.177146	0.359132
FUS:337:x:FUS:456	T7	xlink	21.198	0	23.9791	0	-2.78108	T1	0.00144349	0.0101044
FUS:337:x:FUS:456	T8	xlink	23.9588	0	23.9791	0	-0.0202788	T1	0.578987	0.780971
FUS:337:x:FUS:456	T9	xlink	22.9004	0	23.9791	0	-1.07865	T1	0.0828164	0.177135
FUS:337:x:FUS:456	T10	xlink	22.8861	1	23.9791	0	-1.09296	T1	0.00571449	0.0112825
FUS:337:x:FUS:456	T11	xlink	21.5056	0	23.9791	0	-2.4735	T1	0.00172806	0.00632016
FUS:337:x:FUS:515	T2	xlink	24.9538	0	22.6434	0	2.31044	T1	0.000236135	0.00363648
FUS:337:x:FUS:515	T3	xlink	25.1116	0	22.6434	0	2.4682	T1	0.000833445	0.00493656
FUS:337:x:FUS:515	T4	xlink	24.7088	0	22.6434	0	2.06546	T1	0.00236205	0.0170658
FUS:337:x:FUS:515	T5	xlink	25.2143	0	22.6434	0	2.57087	T1	3.09938e-05	0.00107565
FUS:337:x:FUS:515	T6	xlink	24.4388	0	22.6434	0	1.79545	T1	0.00402517	0.0344375
FUS:337:x:FUS:515	T7	xlink	24.8892	0	22.6434	0	2.24584	T1	0.00135904	0.0101044
FUS:337:x:FUS:515	T8	xlink	25.028	0	22.6434	0	2.38459	T1	0.000758933	0.0116876
FUS:337:x:FUS:515	T9	xlink	24.387	0	22.6434	0	1.74366	T1	0.00310788	0.0170933
FUS:337:x:FUS:515	T10	xlink	24.8283	0	22.6434	0	2.18496	T1	0.000901574	0.00277685
FUS:337:x:FUS:515	T11	xlink	25.2299	0	22.6434	0	2.58649	T1	4.59455e-05	0.000406113
FUS:339	T2	monolink	31.3454	0	30.6892	0	0.656173	T1	0.135338	0.217105
FUS:339	T3	monolink	31.4846	0	30.6892	0	0.795413	T1	0.126551	0.256432
FUS:339	T4	monolink	30.8746	0	30.6892	0	0.18544	T1	0.591406	0.700589
FUS:339	T5	monolink	31.3644	0	30.6892	0	0.675241	T1	0.107462	0.206865
FUS:339	T6	monolink	31.9947	0	30.6892	0	1.30552	T1	0.0122337	0.0724613
FUS:339	T7	monolink	32.59	0	30.6892	0	1.90079	T1	0.00491837	0.0246615
FUS:339	T8	monolink	32.1672	0	30.6892	0	1.47799	T1	0.020053	0.110292
FUS:339	T9	monolink	32.5477	0	30.6892	0	1.85856	T1	0.00696847	0.0335358
FUS:339	T10	monolink	32.0934	0	30.6892	0	1.4042	T1	0.00870796	0.0159646
FUS:339	T11	monolink	32.4914	0	30.6892	0	1.80223	T1	0.00188424	0.00632016
FUS:339:x:FUS:362	T2	xlink	29.6193	0	30.5895	0	-0.970236	T1	6.48485e-05	0.00182081
FUS:339:x:FUS:362	T3	xlink	30.0961	0	30.5895	0	-0.493418	T1	0.00617017	0.0275798
FUS:339:x:FUS:362	T4	xlink	29.8142	0	30.5895	0	-0.775291	T1	1.88512e-05	0.00136992
FUS:339:x:FUS:362	T5	xlink	29.6532	0	30.5895	0	-0.936334	T1	3.95076e-06	0.000304209
FUS:339:x:FUS:362	T6	xlink	30.24	0	30.5895	0	-0.349533	T1	0.00143264	0.0312405
FUS:339:x:FUS:362	T7	xlink	29.8134	0	30.5895	0	-0.776125	T1	1.17419e-05	0.000470818
FUS:339:x:FUS:362	T8	xlink	30.1331	0	30.5895	0	-0.456377	T1	0.117125	0.281833
FUS:339:x:FUS:362	T9	xlink	30.0881	0	30.5895	0	-0.501355	T1	0.0270826	0.0719089
FUS:339:x:FUS:362	T10	xlink	29.5241	0	30.5895	0	-1.06538	T1	2.49415e-06	4.80124e-05
FUS:339:x:FUS:362	T11	xlink	29.5124	0	30.5895	0	-1.07707	T1	4.74678e-05	0.000406113
FUS:339:x:FUS:370	T2	xlink	29.2947	0	29.9337	0	-0.638983	T1	0.0156974	0.0426196
FUS:339:x:FUS:370	T3	xlink	29.8544	0	29.9337	0	-0.079354	T1	0.774723	0.817174
FUS:339:x:FUS:370	T4	xlink	29.271	0	29.9337	0	-0.662742	T1	0.00504735	0.0277604
FUS:339:x:FUS:370	T5	xlink	29.1622	0	29.9337	0	-0.771547	T1	0.00219389	0.00993704
FUS:339:x:FUS:370	T6	xlink	29.0322	0	29.9337	0	-0.901486	T1	0.00234584	0.0312405
FUS:339:x:FUS:370	T7	xlink	29.466	0	29.9337	0	-0.467711	T1	0.021686	0.0556607
FUS:339:x:FUS:370	T8	xlink	29.5521	0	29.9337	0	-0.381662	T1	0.0395198	0.152151
FUS:339:x:FUS:370	T9	xlink	29.2076	0	29.9337	0	-0.726127	T1	0.0119812	0.0439311
FUS:339:x:FUS:370	T10	xlink	28.5885	0	29.9337	0	-1.34521	T1	5.79677e-05	0.00027897
FUS:339:x:FUS:370	T11	xlink	28.5574	0	29.9337	0	-1.37637	T1	2.74614e-05	0.000334201
FUS:339:x:FUS:432	T2	xlink	26.6133	0	27.7241	0	-1.1108	T1	0.00143855	0.0100699
FUS:339:x:FUS:432	T3	xlink	27.8118	0	27.7241	0	0.0876988	T1	0.832361	0.854557
FUS:339:x:FUS:432	T4	xlink	27.6559	0	27.7241	0	-0.0681993	T1	0.838097	0.900105
FUS:339:x:FUS:432	T5	xlink	27.1749	0	27.7241	0	-0.549186	T1	0.144034	0.257922
FUS:339:x:FUS:432	T6	xlink	27.6613	0	27.7241	0	-0.0627738	T1	0.822195	0.933213
FUS:339:x:FUS:432	T7	xlink	26.5011	0	27.7241	0	-1.22304	T1	0.00512447	0.0246615
FUS:339:x:FUS:432	T8	xlink	27.5644	0	27.7241	0	-0.1597	T1	0.71509	0.848637
FUS:339:x:FUS:432	T9	xlink	27.2668	0	27.7241	0	-0.457358	T1	0.185566	0.317524
FUS:339:x:FUS:432	T10	xlink	26.0744	0	27.7241	0	-1.64967	T1	0.00058622	0.00205177
FUS:339:x:FUS:432	T11	xlink	26.9979	0	27.7241	0	-0.726215	T1	0.0381131	0.0715782
FUS:339:x:FUS:453	T2	xlink	27.9828	0	28.6277	0	-0.644886	T1	0.0160515	0.0426196
FUS:339:x:FUS:453	T3	xlink	28.4937	0	28.6277	0	-0.134043	T1	0.533189	0.631624
FUS:339:x:FUS:453	T4	xlink	28.322	0	28.6277	0	-0.305694	T1	0.170484	0.354791
FUS:339:x:FUS:453	T5	xlink	28.2654	0	28.6277	0	-0.362358	T1	0.0543962	0.123192
FUS:339:x:FUS:453	T6	xlink	28.6803	0	28.6277	0	0.0526248	T1	0.832698	0.933213
FUS:339:x:FUS:453	T7	xlink	28.256	0	28.6277	0	-0.37173	T1	0.0994913	0.196432
FUS:339:x:FUS:453	T8	xlink	28.4957	0	28.6277	0	-0.13206	T1	0.603316	0.780971
FUS:339:x:FUS:453	T9	xlink	28.158	0	28.6277	0	-0.469714	T1	0.0581544	0.135693
FUS:339:x:FUS:453	T10	xlink	28.2487	0	28.6277	0	-0.379017	T1	0.068688	0.0992649
FUS:339:x:FUS:453	T11	xlink	28.1909	0	28.6277	0	-0.436864	T1	0.0228596	0.0517703
FUS:339:x:FUS:456	T2	xlink	28.7901	0	29.3907	0	-0.60055	T1	0.0111074	0.0371856
FUS:339:x:FUS:456	T3	xlink	29.2873	0	29.3907	0	-0.103323	T1	0.611376	0.672513
FUS:339:x:FUS:456	T4	xlink	29.1282	0	29.3907	0	-0.26245	T1	0.241658	0.39375
FUS:339:x:FUS:456	T5	xlink	29.1124	0	29.3907	0	-0.278222	T1	0.100002	0.197441
FUS:339:x:FUS:456	T6	xlink	29.4668	0	29.3907	0	0.076143	T1	0.687727	0.897543
FUS:339:x:FUS:456	T7	xlink	29.0967	0	29.3907	0	-0.293932	T1	0.138379	0.236782
FUS:339:x:FUS:456	T8	xlink	29.3124	0	29.3907	0	-0.0782757	T1	0.716382	0.848637
FUS:339:x:FUS:456	T9	xlink	29.0815	0	29.3907	0	-0.30916	T1	0.143191	0.262517
FUS:339:x:FUS:456	T10	xlink	29.1193	0	29.3907	0	-0.271316	T1	0.146054	0.178511
FUS:339:x:FUS:456	T11	xlink	29.0539	0	29.3907	0	-0.336801	T1	0.0687879	0.117704
FUS:339:x:FUS:515	T2	xlink	28.5421	0	29.1086	0	-0.566502	T1	0.000826898	0.00909588
FUS:339:x:FUS:515	T3	xlink	28.6028	0	29.1086	0	-0.505753	T1	0.000124831	0.0010322
FUS:339:x:FUS:515	T4	xlink	28.6642	0	29.1086	0	-0.44436	T1	0.0101178	0.0486919
FUS:339:x:FUS:515	T5	xlink	28.6381	0	29.1086	0	-0.470446	T1	5.54892e-05	0.00107565
FUS:339:x:FUS:515	T6	xlink	28.8801	0	29.1086	0	-0.228428	T1	0.00657602	0.0460321
FUS:339:x:FUS:515	T7	xlink	28.8064	0	29.1086	0	-0.302166	T1	0.00343032	0.0209025
FUS:339:x:FUS:515	T8	xlink	28.8685	0	29.1086	0	-0.240048	T1	0.0227142	0.116599
FUS:339:x:FUS:515	T9	xlink	28.9228	0	29.1086	0	-0.185749	T1	0.0540426	0.13004
FUS:339:x:FUS:515	T10	xlink	28.7801	0	29.1086	0	-0.328501	T1	0.0360869	0.0555738
FUS:339:x:FUS:515	T11	xlink	28.8946	0	29.1086	0	-0.21394	T1	0.0109233	0.0271322
FUS:353	T2	monolink	27.3987	0	26.9791	0	0.419599	T1	0.234853	0.334737
FUS:353	T3	monolink	28.3932	0	26.9791	0	1.41408	T1	0.00876099	0.0317022
FUS:353	T4	monolink	27.5309	0	26.9791	0	0.551754	T1	0.365205	0.540785
FUS:353	T5	monolink	27.4634	0	26.9791	0	0.484309	T1	0.230697	0.362524
FUS:353	T6	monolink	26.9703	0	26.9791	0	-0.00878077	T1	0.981166	0.987648
FUS:353	T7	monolink	27.6067	0	26.9791	0	0.627605	T1	0.159703	0.241121
FUS:353	T8	monolink	27.7732	0	26.9791	0	0.794115	T1	0.0858051	0.220233
FUS:353	T9	monolink	28.3262	0	26.9791	0	1.34706	T1	0.0105798	0.042876
FUS:353	T10	monolink	27.4101	0	26.9791	0	0.430956	T1	0.260259	0.303635
FUS:353	T11	monolink	27.6012	0	26.9791	0	0.622054	T1	0.103875	0.148118
FUS:362	T2	monolink	29.3743	0	29.0517	0	0.322568	T1	0.991698	0.991698
FUS:362	T3	monolink	29.4222	0	29.0517	0	0.3705	T1	0.896634	0.902563
FUS:362	T4	monolink	28.7508	1	29.0517	0	-0.30086	T1	0.225695	0.38619
FUS:362	T5	monolink	28.51	0.0833333	29.0517	0	-0.541658	T1	0.034309	0.0910964
FUS:362	T6	monolink	29.4576	0.166667	29.0517	0	0.405865	T1	0.848814	0.933213
FUS:362	T7	monolink	30.2931	0	29.0517	0	1.24137	T1	0.0929325	0.188311
FUS:362	T8	monolink	27.8997	1	29.0517	0	-1.15202	T1	0.463143	0.758766
FUS:362	T9	monolink	29.0698	1	29.0517	0	0.018099	T1	0.971139	0.994219
FUS:362	T10	monolink	28.2336	1	29.0517	0	-0.81807	T1	0.426657	0.462713
FUS:362	T11	monolink	29.946	1	29.0517	0	0.894279	T1	0.0298233	0.0604315
FUS:362:x:FUS:362	T2	xlink	25.6234	0	26.4005	0	-0.777114	T1	0.0067415	0.0259548
FUS:362:x:FUS:362	T3	xlink	26.5954	0	26.4005	0	0.194861	T1	0.598381	0.672513
FUS:362:x:FUS:362	T4	xlink	25.9534	0	26.4005	0	-0.447069	T1	0.316085	0.477227
FUS:362:x:FUS:362	T5	xlink	25.292	0	26.4005	0	-1.10855	T1	0.0124761	0.0384263
FUS:362:x:FUS:362	T6	xlink	25.9429	0	26.4005	0	-0.457621	T1	0.114006	0.316661
FUS:362:x:FUS:362	T7	xlink	25.6735	0	26.4005	0	-0.726968	T1	0.0299296	0.0743414
FUS:362:x:FUS:362	T8	xlink	26.2433	0	26.4005	0	-0.157228	T1	0.674794	0.824748
FUS:362:x:FUS:362	T9	xlink	26.5161	0	26.4005	0	0.115635	T1	0.695416	0.799209
FUS:362:x:FUS:362	T10	xlink	23.7253	0	26.4005	0	-2.67519	T1	2.95905e-05	0.000207133
FUS:362:x:FUS:362	T11	xlink	23.2286	0	26.4005	0	-3.17187	T1	8.8464e-05	0.000662194
FUS:362:x:FUS:370	T2	looplink	27.6365	0	27.8401	0	-0.203545	T1	0.358016	0.451922
FUS:362:x:FUS:370	T3	looplink	27.3611	0	27.8401	0	-0.478945	T1	0.00727949	0.028026
FUS:362:x:FUS:370	T4	looplink	27.6367	0	27.8401	0	-0.203389	T1	0.640727	0.736358
FUS:362:x:FUS:370	T5	looplink	26.4711	0	27.8401	0	-1.369	T1	0.00144625	0.00744695
FUS:362:x:FUS:370	T6	looplink	27.7381	0	27.8401	0	-0.101995	T1	0.832885	0.933213
FUS:362:x:FUS:370	T7	looplink	28.0425	0	27.8401	0	0.202405	T1	0.0696244	0.157679
FUS:362:x:FUS:370	T8	looplink	27.5357	0	27.8401	0	-0.304388	T1	0.0549963	0.169109
FUS:362:x:FUS:370	T9	looplink	28.2246	0	27.8401	0	0.384572	T1	0.00882754	0.0377623
FUS:362:x:FUS:370	T10	looplink	27.397	0	27.8401	0	-0.44306	T1	0.243657	0.29315
FUS:362:x:FUS:370	T11	looplink	27.6415	0	27.8401	0	-0.198562	T1	0.933808	0.986509
FUS:362:x:FUS:370	T2	xlink	26.7828	0	27.134	0	-0.351149	T1	0.18913	0.285549
FUS:362:x:FUS:370	T3	xlink	27.1755	0	27.134	0	0.0415651	T1	0.902563	0.902563
FUS:362:x:FUS:370	T4	xlink	27.0998	0	27.134	0	-0.0341641	T1	0.896327	0.920229
FUS:362:x:FUS:370	T5	xlink	27.1072	0	27.134	0	-0.026813	T1	0.884663	0.922706
FUS:362:x:FUS:370	T6	xlink	27.1723	0	27.134	0	0.0383388	T1	0.884419	0.933213
FUS:362:x:FUS:370	T7	xlink	26.9644	0	27.134	0	-0.169564	T1	0.539466	0.670786
FUS:362:x:FUS:370	T8	xlink	27.1491	0	27.134	0	0.0151554	T1	0.968343	0.968343
FUS:362:x:FUS:370	T9	xlink	27.6373	0	27.134	0	0.503286	T1	0.110318	0.223538
FUS:362:x:FUS:370	T10	xlink	26.49	0	27.134	0	-0.644011	T1	0.0172005	0.0294319
FUS:362:x:FUS:370	T11	xlink	26.6889	0	27.134	0	-0.445116	T1	0.0982655	0.145509
FUS:362:x:FUS:432	T2	xlink	26.5932	0	27.4047	0	-0.811482	T1	0.0467445	0.0992549
FUS:362:x:FUS:432	T3	xlink	27.7974	0	27.4047	0	0.392727	T1	0.47741	0.591285
FUS:362:x:FUS:432	T4	xlink	27.5077	0	27.4047	0	0.102961	T1	0.853346	0.900105
FUS:362:x:FUS:432	T5	xlink	26.9906	0	27.4047	0	-0.414146	T1	0.408049	0.563622
FUS:362:x:FUS:432	T6	xlink	27.6293	0	27.4047	0	0.224565	T1	0.555418	0.778092
FUS:362:x:FUS:432	T7	xlink	26.3844	0	27.4047	0	-1.02027	T1	0.0556514	0.129853
FUS:362:x:FUS:432	T8	xlink	27.4639	0	27.4047	0	0.0592375	T1	0.916417	0.94891
FUS:362:x:FUS:432	T9	xlink	27.5653	0	27.4047	0	0.160569	T1	0.737382	0.817349
FUS:362:x:FUS:432	T10	xlink	25.6184	0	27.4047	0	-1.78626	T1	0.00340201	0.00707985
FUS:362:x:FUS:432	T11	xlink	26.8579	0	27.4047	0	-0.546764	T1	0.221711	0.294341
FUS:362:x:FUS:453	T2	xlink	26.1341	0	27.7803	0	-1.64625	T1	7.09407e-05	0.00182081
FUS:362:x:FUS:453	T3	xlink	27.9987	0	27.7803	0	0.218372	T1	0.606282	0.672513
FUS:362:x:FUS:453	T4	xlink	27.9726	0	27.7803	0	0.192275	T1	0.569434	0.685101
FUS:362:x:FUS:453	T5	xlink	27.7089	0	27.7803	0	-0.0713888	T1	0.79233	0.876844
FUS:362:x:FUS:453	T6	xlink	28.2693	0	27.7803	0	0.488951	T1	0.136759	0.329077
FUS:362:x:FUS:453	T7	xlink	27.0294	0	27.7803	0	-0.75093	T1	0.0731231	0.160871
FUS:362:x:FUS:453	T8	xlink	27.9849	0	27.7803	0	0.204608	T1	0.608549	0.780971
FUS:362:x:FUS:453	T9	xlink	27.6832	0	27.7803	0	-0.0971222	T1	0.788448	0.855077
FUS:362:x:FUS:453	T10	xlink	27.2036	0	27.7803	0	-0.576708	T1	0.0839586	0.107747
FUS:362:x:FUS:453	T11	xlink	27.7923	0	27.7803	0	0.0120027	T1	0.986509	0.986509
FUS:362:x:FUS:456	T2	xlink	27.9499	0	28.4764	0	-0.526522	T1	0.0348799	0.0813864
FUS:362:x:FUS:456	T3	xlink	28.7134	0	28.4764	0	0.237036	T1	0.491458	0.591285
FUS:362:x:FUS:456	T4	xlink	28.5351	0	28.4764	0	0.0586973	T1	0.84497	0.900105
FUS:362:x:FUS:456	T5	xlink	28.5563	0	28.4764	0	0.0798583	T1	0.752499	0.852094
FUS:362:x:FUS:456	T6	xlink	28.9203	0	28.4764	0	0.443896	T1	0.100154	0.305173
FUS:362:x:FUS:456	T7	xlink	28.0607	0	28.4764	0	-0.415676	T1	0.157077	0.241121
FUS:362:x:FUS:456	T8	xlink	28.6621	0	28.4764	0	0.185717	T1	0.569036	0.780971
FUS:362:x:FUS:456	T9	xlink	28.4793	0	28.4764	0	0.00293822	T1	0.994219	0.994219
FUS:362:x:FUS:456	T10	xlink	28.028	0	28.4764	0	-0.448407	T1	0.0762318	0.102673
FUS:362:x:FUS:456	T11	xlink	28.4764	0	28.4764	0	2.38147e-05	T1	0.986137	0.986509
FUS:362:x:FUS:515	T2	xlink	29.025	0	29.5806	0	-0.555584	T1	0.00444727	0.0214025
FUS:362:x:FUS:515	T3	xlink	29.2634	0	29.5806	0	-0.317211	T1	0.0729135	0.170132
FUS:362:x:FUS:515	T4	xlink	29.2945	0	29.5806	0	-0.286088	T1	0.0763243	0.211229
FUS:362:x:FUS:515	T5	xlink	29.2846	0	29.5806	0	-0.296017	T1	0.0827101	0.167597
FUS:362:x:FUS:515	T6	xlink	29.6356	0	29.5806	0	0.0550038	T1	0.661183	0.881814
FUS:362:x:FUS:515	T7	xlink	29.0819	0	29.5806	0	-0.498719	T1	0.0113587	0.0323934
FUS:362:x:FUS:515	T8	xlink	29.473	0	29.5806	0	-0.107601	T1	0.545944	0.780971
FUS:362:x:FUS:515	T9	xlink	29.6493	0	29.5806	0	0.0687355	T1	0.671631	0.799209
FUS:362:x:FUS:515	T10	xlink	29.1824	0	29.5806	0	-0.3982	T1	0.0307098	0.0482583
FUS:362:x:FUS:515	T11	xlink	29.5935	0	29.5806	0	0.0128744	T1	0.941362	0.986509
FUS:370	T2	monolink	30.7914	0	31.4954	0	-0.703992	T1	0.00400125	0.0205397
FUS:370	T3	monolink	30.286	0	31.4954	0	-1.20935	T1	0.0805488	0.177207
FUS:370	T4	monolink	31.0099	0	31.4954	0	-0.485468	T1	0.0131244	0.0531884
FUS:370	T5	monolink	30.7739	0	31.4954	0	-0.721516	T1	0.00241446	0.0103285
FUS:370	T6	monolink	30.177	0	31.4954	0	-1.31842	T1	0.0010527	0.0312405
FUS:370	T7	monolink	31.3001	0	31.4954	0	-0.195302	T1	0.485364	0.633441
FUS:370	T8	monolink	30.6982	0	31.4954	0	-0.797186	T1	0.0560917	0.169109
FUS:370	T9	monolink	30.916	0	31.4954	0	-0.579352	T1	0.000614048	0.00429834
FUS:370	T10	monolink	31.1979	0	31.4954	0	-0.297469	T1	0.076897	0.102673
FUS:370	T11	monolink	31.3934	0	31.4954	0	-0.101983	T1	0.509348	0.612809
FUS:370:x:FUS:370	T2	xlink	22.8707	1	22.3478	1	0.522843	T1	0.204605	0.302974
FUS:370:x:FUS:370	T3	xlink	22.7544	0	22.3478	1	0.40652	T1	0.253774	0.415758
FUS:370:x:FUS:370	T4	xlink	23.5701	0	22.3478	1	1.22231	T1	0.00776045	0.039837
FUS:370:x:FUS:370	T5	xlink	22.818	1	22.3478	1	0.470149	T1	0.184049	0.314929
FUS:370:x:FUS:370	T6	xlink	22.6664	1	22.3478	1	0.318515	T1	0.32325	0.526518
FUS:370:x:FUS:370	T7	xlink	24.1131	0	22.3478	1	1.76528	T1	0.000511133	0.00724888
FUS:370:x:FUS:370	T8	xlink	22.2007	1	22.3478	1	-0.147103	T1	0.743543	0.85452
FUS:370:x:FUS:370	T9	xlink	22.5018	1	22.3478	1	0.153959	T1	0.671915	0.799209
FUS:370:x:FUS:370	T10	xlink	22.7916	1	22.3478	1	0.443731	T1	0.133937	0.166341
FUS:370:x:FUS:370	T11	xlink	22.454	1	22.3478	1	0.106154	T1	0.724458	0.843437
FUS:370:x:FUS:432	T2	xlink	26.0375	0	26.737	0	-0.699466	T1	0.0476939	0.0992549
FUS:370:x:FUS:432	T3	xlink	27.2166	0	26.737	0	0.479612	T1	0.340573	0.535186
FUS:370:x:FUS:432	T4	xlink	27.0372	0	26.737	0	0.300243	T1	0.4959	0.685101
FUS:370:x:FUS:432	T5	xlink	26.4485	0	26.737	0	-0.288493	T1	0.507772	0.662686
FUS:370:x:FUS:432	T6	xlink	26.5587	0	26.737	0	-0.178231	T1	0.565885	0.778092
FUS:370:x:FUS:432	T7	xlink	25.7856	0	26.737	0	-0.951339	T1	0.0377371	0.0908048
FUS:370:x:FUS:432	T8	xlink	26.6102	0	26.737	0	-0.126702	T1	0.763198	0.86421
FUS:370:x:FUS:432	T9	xlink	26.427	0	26.737	0	-0.309923	T1	0.450483	0.590042
FUS:370:x:FUS:432	T10	xlink	23.4417	0	26.737	0	-3.29524	T1	0.000715545	0.00229571
FUS:370:x:FUS:432	T11	xlink	25.3173	0	26.737	0	-1.4197	T1	0.00478413	0.0141684
FUS:370:x:FUS:453	T2	xlink	25.6807	0	25.6111	0	0.069645	T1	0.872995	0.896275
FUS:370:x:FUS:453	T3	xlink	26.7123	0	25.6111	0	1.10119	T1	0.00949485	0.0317871
FUS:370:x:FUS:453	T4	xlink	26.1004	0	25.6111	0	0.489295	T1	0.104364	0.259226
FUS:370:x:FUS:453	T5	xlink	25.6503	0	25.6111	0	0.039253	T1	0.850198	0.90924
FUS:370:x:FUS:453	T6	xlink	26.0672	0	25.6111	0	0.456129	T1	0.123374	0.316661
FUS:370:x:FUS:453	T7	xlink	25.8485	0	25.6111	0	0.23739	T1	0.504315	0.647204
FUS:370:x:FUS:453	T8	xlink	26.1252	0	25.6111	0	0.514125	T1	0.0944279	0.234547
FUS:370:x:FUS:453	T9	xlink	24.7904	0	25.6111	0	-0.820637	T1	0.140894	0.262517
FUS:370:x:FUS:453	T10	xlink	22.2676	1	25.6111	0	-3.34352	T1	4.7164e-06	7.26326e-05
FUS:370:x:FUS:453	T11	xlink	23.1371	0	25.6111	0	-2.47401	T1	0.000338066	0.00185936
FUS:370:x:FUS:456	T2	xlink	26.0832	0	25.603	0	0.480151	T1	0.0373336	0.0845497
FUS:370:x:FUS:456	T3	xlink	26.1927	0	25.603	0	0.589702	T1	0.00616413	0.0275798
FUS:370:x:FUS:456	T4	xlink	26.3556	0	25.603	0	0.752613	T1	0.00070347	0.0108334
FUS:370:x:FUS:456	T5	xlink	26.2056	0	25.603	0	0.602542	T1	0.0014507	0.00744695
FUS:370:x:FUS:456	T6	xlink	26.0307	0	25.603	0	0.427707	T1	0.0031179	0.0337306
FUS:370:x:FUS:456	T7	xlink	26.1087	0	25.603	0	0.505662	T1	0.0101763	0.0313429
FUS:370:x:FUS:456	T8	xlink	25.9947	0	25.603	0	0.391664	T1	0.0163684	0.0969513
FUS:370:x:FUS:456	T9	xlink	25.9408	0	25.603	0	0.337795	T1	0.0323487	0.0830285
FUS:370:x:FUS:456	T10	xlink	23.2382	0.166667	25.603	0	-2.36482	T1	0.000171148	0.000775201
FUS:370:x:FUS:456	T11	xlink	24.3616	0	25.603	0	-1.24146	T1	0.00371527	0.0119198
FUS:370:x:FUS:515	T2	xlink	27.6516	0	27.9253	0	-0.273676	T1	0.049768	0.100846
FUS:370:x:FUS:515	T3	xlink	27.7017	0	27.9253	0	-0.223571	T1	0.0791145	0.177207
FUS:370:x:FUS:515	T4	xlink	27.7755	0	27.9253	0	-0.149814	T1	0.185982	0.373314
FUS:370:x:FUS:515	T5	xlink	27.7142	0	27.9253	0	-0.211133	T1	0.215059	0.35233
FUS:370:x:FUS:515	T6	xlink	27.9247	0	27.9253	0	-0.000635725	T1	0.987648	0.987648
FUS:370:x:FUS:515	T7	xlink	27.7809	0	27.9253	0	-0.144396	T1	0.192361	0.279468
FUS:370:x:FUS:515	T8	xlink	27.8075	0	27.9253	0	-0.117794	T1	0.285262	0.511156
FUS:370:x:FUS:515	T9	xlink	27.8709	0	27.9253	0	-0.0543828	T1	0.688218	0.799209
FUS:370:x:FUS:515	T10	xlink	27.1818	0	27.9253	0	-0.743563	T1	0.00064077	0.00214519
FUS:370:x:FUS:515	T11	xlink	27.6135	0	27.9253	0	-0.311837	T1	0.0186602	0.0435405
FUS:432	T2	monolink	30.9032	0	30.2109	1	0.692344	T1	0.00734761	0.0269412
FUS:432	T3	monolink	30.7599	0	30.2109	1	0.549062	T1	0.198641	0.373058
FUS:432	T4	monolink	31.1168	0	30.2109	1	0.905918	T1	0.00208153	0.0170658
FUS:432	T5	monolink	30.8152	0	30.2109	1	0.604308	T1	0.29011	0.438009
FUS:432	T6	monolink	30.7618	0	30.2109	1	0.550972	T1	0.428705	0.660206
FUS:432	T7	monolink	30.347	1	30.2109	1	0.136079	T1	0.975718	0.975718
FUS:432	T8	monolink	31.2489	0	30.2109	1	1.03798	T1	0.00219585	0.0211351
FUS:432	T9	monolink	31.715	0	30.2109	1	1.50417	T1	0.00016058	0.00304631
FUS:432	T10	monolink	30.7185	0	30.2109	1	0.50764	T1	0.0786718	0.102673
FUS:432	T11	monolink	31.088	1	30.2109	1	0.877095	T1	0.000595709	0.00241419
FUS:432:x:FUS:432	T2	xlink	23.0662	0.166667	23.5591	0.166667	-0.492884	T1	0.658848	0.735236
FUS:432:x:FUS:432	T3	xlink	26.1237	0	23.5591	0.166667	2.56463	T1	0.0661768	0.164375
FUS:432:x:FUS:432	T4	xlink	25.5006	0	23.5591	0.166667	1.94158	T1	0.151572	0.333458
FUS:432:x:FUS:432	T5	xlink	23.53	0.0833333	23.5591	0.166667	-0.0290759	T1	0.982331	0.982331
FUS:432:x:FUS:432	T6	xlink	25.2905	0	23.5591	0.166667	1.73144	T1	0.0898629	0.292088
FUS:432:x:FUS:432	T7	xlink	21.9686	0.125	23.5591	0.166667	-1.5905	T1	0.260796	0.358595
FUS:432:x:FUS:432	T8	xlink	24.2835	0	23.5591	0.166667	0.724482	T1	0.544302	0.780971
FUS:432:x:FUS:432	T9	xlink	24.0666	0	23.5591	0.166667	0.507551	T1	0.743045	0.817349
FUS:432:x:FUS:432	T10	xlink	22.9384	1	23.5591	0.166667	-0.620667	T1	0.500579	0.528008
FUS:432:x:FUS:432	T11	xlink	23.4872	0.166667	23.5591	0.166667	-0.0718713	T1	0.980301	0.986509
FUS:432:x:FUS:453	T2	xlink	28.0411	0	28.6648	0	-0.623736	T1	0.0833726	0.140879
FUS:432:x:FUS:453	T3	xlink	29.0932	0	28.6648	0	0.428421	T1	0.402068	0.57332
FUS:432:x:FUS:453	T4	xlink	29.1678	0	28.6648	0	0.503016	T1	0.239998	0.39375
FUS:432:x:FUS:453	T5	xlink	28.8285	0	28.6648	0	0.163653	T1	0.681463	0.79504
FUS:432:x:FUS:453	T6	xlink	29.1919	0	28.6648	0	0.527063	T1	0.192932	0.380917
FUS:432:x:FUS:453	T7	xlink	27.2361	0	28.6648	0	-1.42876	T1	0.00940516	0.0301749
FUS:432:x:FUS:453	T8	xlink	28.4765	0	28.6648	0	-0.188285	T1	0.733355	0.85452
FUS:432:x:FUS:453	T9	xlink	27.8982	0	28.6648	0	-0.766614	T1	0.118772	0.234499
FUS:432:x:FUS:453	T10	xlink	26.7038	0	28.6648	0	-1.96104	T1	0.0015708	0.0043197
FUS:432:x:FUS:453	T11	xlink	27.9864	0	28.6648	0	-0.678441	T1	0.101726	0.14779
FUS:432:x:FUS:456	T2	xlink	28.8874	0	29.5181	0	-0.630711	T1	0.0705015	0.127293
FUS:432:x:FUS:456	T3	xlink	29.9454	0	29.5181	0	0.427263	T1	0.394201	0.572707
FUS:432:x:FUS:456	T4	xlink	30.029	0	29.5181	0	0.510863	T1	0.222764	0.38619
FUS:432:x:FUS:456	T5	xlink	29.7145	0	29.5181	0	0.196384	T1	0.619646	0.745834
FUS:432:x:FUS:456	T6	xlink	30.0106	0	29.5181	0	0.492469	T1	0.206035	0.396618
FUS:432:x:FUS:456	T7	xlink	28.2164	0	29.5181	0	-1.30177	T1	0.0110799	0.0323934
FUS:432:x:FUS:456	T8	xlink	29.4427	0	29.5181	0	-0.0754645	T1	0.879004	0.940045
FUS:432:x:FUS:456	T9	xlink	28.8891	0	29.5181	0	-0.629025	T1	0.164129	0.290016
FUS:432:x:FUS:456	T10	xlink	27.4755	0	29.5181	0	-2.04266	T1	0.00189202	0.00464872
FUS:432:x:FUS:456	T11	xlink	28.8193	0	29.5181	0	-0.698853	T1	0.0971434	0.145509
FUS:432:x:FUS:515	T2	xlink	28.0804	0	28.5183	0	-0.437881	T1	0.169119	0.265758
FUS:432:x:FUS:515	T3	xlink	28.8462	0	28.5183	0	0.32792	T1	0.455004	0.584014
FUS:432:x:FUS:515	T4	xlink	29.0234	0	28.5183	0	0.505169	T1	0.191002	0.373314
FUS:432:x:FUS:515	T5	xlink	28.5582	0	28.5183	0	0.0399083	T1	0.927487	0.939691
FUS:432:x:FUS:515	T6	xlink	28.8139	0	28.5183	0	0.295634	T1	0.328219	0.526518
FUS:432:x:FUS:515	T7	xlink	27.1418	0	28.5183	0	-1.37645	T1	0.00598883	0.0271259
FUS:432:x:FUS:515	T8	xlink	28.1976	0	28.5183	0	-0.320683	T1	0.494438	0.776974
FUS:432:x:FUS:515	T9	xlink	28.0186	0	28.5183	0	-0.499632	T1	0.224537	0.367858
FUS:432:x:FUS:515	T10	xlink	26.7812	0	28.5183	0	-1.73703	T1	0.000992691	0.00293989
FUS:432:x:FUS:515	T11	xlink	27.9961	0	28.5183	0	-0.522202	T1	0.148809	0.208332
FUS:453	T2	monolink	33.4936	0	33.6157	0	-0.122119	T1	0.524489	0.621318
FUS:453	T3	monolink	33.5306	0	33.6157	0	-0.0851113	T1	0.742099	0.793633
FUS:453	T4	monolink	34.2641	0	33.6157	0	0.648401	T1	0.0374064	0.12523
FUS:453	T5	monolink	34.1704	0	33.6157	0	0.554672	T1	0.0400703	0.0964191
FUS:453	T6	monolink	33.65	0	33.6157	0	0.034281	T1	0.864744	0.933213
FUS:453	T7	monolink	31.8112	0	33.6157	0	-1.80448	T1	0.000109987	0.00211725
FUS:453	T8	monolink	34.043	0	33.6157	0	0.427243	T1	0.174697	0.363558
FUS:453	T9	monolink	33.3186	0	33.6157	0	-0.297156	T1	0.297754	0.440905
FUS:453	T10	monolink	33.7858	0	33.6157	0	0.170082	T1	0.513601	0.534422
FUS:453	T11	monolink	33.8273	0	33.6157	0	0.21159	T1	0.326288	0.411872
FUS:453:x:FUS:456	T2	looplink	33.9508	0	33.6824	0	0.26834	T1	0.040399	0.0888777
FUS:453:x:FUS:456	T3	looplink	33.772	0	33.6824	0	0.0895484	T1	0.488945	0.591285
FUS:453:x:FUS:456	T4	looplink	34.2373	0	33.6824	0	0.554888	T1	0.0122456	0.0531884
FUS:453:x:FUS:456	T5	looplink	34.2572	0	33.6824	0	0.574771	T1	0.000651465	0.00456026
FUS:453:x:FUS:456	T6	looplink	34.0056	0	33.6824	0	0.323171	T1	0.0849368	0.292088
FUS:453:x:FUS:456	T7	looplink	33.9015	0	33.6824	0	0.219024	T1	0.125005	0.229176
FUS:453:x:FUS:456	T8	looplink	33.974	0	33.6824	0	0.291556	T1	0.0673995	0.185349
FUS:453:x:FUS:456	T9	looplink	33.8298	0	33.6824	0	0.147376	T1	0.29711	0.440905
FUS:453:x:FUS:456	T10	looplink	33.1745	0	33.6824	0	-0.507978	T1	0.00189885	0.00464872
FUS:453:x:FUS:456	T11	looplink	33.414	0	33.6824	0	-0.268429	T1	0.031951	0.0630828
FUS:453:x:FUS:456	T2	xlink	22.2447	1	22.5717	1	-0.327014	T1	0.0818726	0.140879
FUS:453:x:FUS:456	T3	xlink	22.4773	1	22.5717	1	-0.0943507	T1	0.372324	0.551326
FUS:453:x:FUS:456	T4	xlink	22.5235	1	22.5717	1	-0.0481408	T1	0.630171	0.7352
FUS:453:x:FUS:456	T5	xlink	22.5783	1	22.5717	1	0.00659715	T1	0.902483	0.926549
FUS:453:x:FUS:456	T6	xlink	22.8283	1	22.5717	1	0.256654	T1	0.728857	0.915648
FUS:453:x:FUS:456	T7	xlink	22.2804	1	22.5717	1	-0.291304	T1	0.236767	0.331474
FUS:453:x:FUS:456	T8	xlink	22.8061	1	22.5717	1	0.234442	T1	0.896083	0.945184
FUS:453:x:FUS:456	T9	xlink	22.7186	1	22.5717	1	0.146893	T1	0.845517	0.885203
FUS:453:x:FUS:456	T10	xlink	22.317	0.666667	22.5717	1	-0.254729	T1	0.413766	0.455143
FUS:453:x:FUS:456	T11	xlink	22.8618	1	22.5717	1	0.290139	T1	0.854759	0.940235
FUS:453:x:FUS:515	T2	xlink	28.1432	0	28.4557	0	-0.312436	T1	0.251061	0.345209
FUS:453:x:FUS:515	T3	xlink	28.6595	0	28.4557	0	0.203845	T1	0.558204	0.651238
FUS:453:x:FUS:515	T4	xlink	28.6443	0	28.4557	0	0.188612	T1	0.569291	0.685101
FUS:453:x:FUS:515	T5	xlink	28.7704	0	28.4557	0	0.314745	T1	0.2235	0.358531
FUS:453:x:FUS:515	T6	xlink	28.4941	0	28.4557	0	0.0383833	T1	0.896854	0.933213
FUS:453:x:FUS:515	T7	xlink	28.0151	0	28.4557	0	-0.440558	T1	0.148288	0.237878
FUS:453:x:FUS:515	T8	xlink	28.4859	0	28.4557	0	0.0302408	T1	0.924263	0.94891
FUS:453:x:FUS:515	T9	xlink	28.0461	0	28.4557	0	-0.409606	T1	0.2074	0.347169
FUS:453:x:FUS:515	T10	xlink	27.9036	0	28.4557	0	-0.552095	T1	0.0695004	0.0992649
FUS:453:x:FUS:515	T11	xlink	28.4477	0	28.4557	0	-0.00795558	T1	0.950894	0.986509
FUS:456	T2	monolink	34.8276	0	34.2525	0	0.575134	T1	0.00164139	0.0105322
FUS:456	T3	monolink	34.7779	0	34.2525	0	0.525465	T1	0.0480028	0.127456
FUS:456	T4	monolink	34.8868	0	34.2525	0	0.634376	T1	0.0126703	0.0531884
FUS:456	T5	monolink	34.8812	0	34.2525	0	0.628695	T1	0.00124083	0.00734953
FUS:456	T6	monolink	34.5794	0	34.2525	0	0.326889	T1	0.0910403	0.292088
FUS:456	T7	monolink	34.2441	0	34.2525	0	-0.00837146	T1	0.941926	0.95432
FUS:456	T8	monolink	34.2524	0	34.2525	0	-1.51457e-05	T1	0.844146	0.928561
FUS:456	T9	monolink	34.3226	0	34.2525	0	0.0701401	T1	0.687356	0.799209
FUS:456	T10	monolink	34.2559	0	34.2525	0	0.00341394	T1	0.968501	0.968501
FUS:456	T11	monolink	34.5603	0	34.2525	0	0.307815	T1	0.0716768	0.119981
FUS:456:x:FUS:515	T2	xlink	28.7702	0	29.2436	0	-0.473464	T1	0.019292	0.049516
FUS:456:x:FUS:515	T3	xlink	29.0674	0	29.2436	0	-0.176186	T1	0.423204	0.584014
FUS:456:x:FUS:515	T4	xlink	29.089	0	29.2436	0	-0.154578	T1	0.511074	0.685101
FUS:456:x:FUS:515	T5	xlink	29.0968	0	29.2436	0	-0.146828	T1	0.409907	0.563622
FUS:456:x:FUS:515	T6	xlink	29.0187	0	29.2436	0	-0.224945	T1	0.226178	0.424774
FUS:456:x:FUS:515	T7	xlink	28.559	0	29.2436	0	-0.684664	T1	0.00660469	0.0280355
FUS:456:x:FUS:515	T8	xlink	28.9307	0	29.2436	0	-0.312938	T1	0.164971	0.362937
FUS:456:x:FUS:515	T9	xlink	28.6551	0	29.2436	0	-0.588519	T1	0.0212057	0.0653136
FUS:456:x:FUS:515	T10	xlink	28.5258	0	29.2436	0	-0.717835	T1	0.00284618	0.00664108
FUS:456:x:FUS:515	T11	xlink	28.9175	0	29.2436	0	-0.326092	T1	0.0858455	0.1349
FUS:515:x:FUS:515	T2	xlink	27.3695	0	27.2233	0	0.146278	T1	0.231671	0.334737
FUS:515:x:FUS:515	T3	xlink	27.1243	0	27.2233	0	-0.0989967	T1	0.455076	0.584014
FUS:515:x:FUS:515	T4	xlink	27.5718	0	27.2233	0	0.348544	T1	0.0373097	0.12523
FUS:515:x:FUS:515	T5	xlink	27.6741	0	27.2233	0	0.45088	T1	0.0368207	0.0923719
FUS:515:x:FUS:515	T6	xlink	27.7002	0	27.2233	0	0.476928	T1	0.117453	0.316661
FUS:515:x:FUS:515	T7	xlink	27.3256	0	27.2233	0	0.102337	T1	0.585594	0.670786
FUS:515:x:FUS:515	T8	xlink	27.6229	0	27.2233	0	0.399674	T1	0.0602102	0.17171
FUS:515:x:FUS:515	T9	xlink	26.1096	0	27.2233	0	-1.11368	T1	0.000519095	0.00399704
FUS:515:x:FUS:515	T10	xlink	26.9663	0	27.2233	0	-0.256974	T1	0.346034	0.391832
FUS:515:x:FUS:515	T11	xlink	27.8595	0	27.2233	0	0.636255	T1	0.000455966	0.00212252

## Sheet: Table S3
Supplemental Table 5. Test of short Crosslinking times. Related to Figure S1C
Crosslinks were only considered, if they were identified with a deltaS < 0.95 and an ld score ≥ 25 (filtering was done on the level of the unique Crosslinking site) and an FDR < 0.05 as calculated by xProphet for at least one replicate.
uxID	Id	Protein1	Protein2	XLType	AbsPos1	AbsPos2	deltaS	ld-Score	FDR	Replicate
HSP26_YEAST:107	SVAVPVDILDHDNNYELKVVVPGVK-K18-155	HSP26_YEAST	-	monolink	107	n/a	0	34.64	0	1 min 1
HSP26_YEAST:107	SVAVPVDILDHDNNYELKVVVPGVK-K18-155	HSP26_YEAST	-	monolink	107	n/a	0	37.32	0	1 min 2
HSP26_YEAST:107	SVAVPVDILDHDNNYELKVVVPGVK-K18-155	HSP26_YEAST	-	monolink	107	n/a	0	35.05	0	30 min 1
HSP26_YEAST:107	SVAVPVDILDHDNNYELKVVVPGVK-K18-155	HSP26_YEAST	-	monolink	107	n/a	0	35.91	0	30 min 2
HSP26_YEAST:107	SVAVPVDILDHDNNYELKVVVPGVK-K18-155	HSP26_YEAST	-	monolink	107	n/a	0	34.05	0	5 min 1
HSP26_YEAST:107	SVAVPVDILDHDNNYELKVVVPGVK-K18-155	HSP26_YEAST	-	monolink	107	n/a	0	30.17	0	5 min 2
HSP26_YEAST:107:x:HSP26_YEAST:114	SVAVPVDILDHDNNYELKVVVPGVK-VVVPGVKSK-a18-b7	HSP26_YEAST	HSP26_YEAST	intra-protein xl	107	114	0	29.42	0.029	30 min 1
HSP26_YEAST:114:x:HSP26_YEAST:114	VVVPGVKSK-VVVPGVKSK-a7-b7	HSP26_YEAST	HSP26_YEAST	intra-protein xl	114	114	0	26.82	0.045	1 min 1
HSP26_YEAST:114:x:HSP26_YEAST:114	VVVPGVKSK-VVVPGVKSK-a7-b7	HSP26_YEAST	HSP26_YEAST	intra-protein xl	114	114	0	28.55	0.017	1 min 2
HSP26_YEAST:114:x:HSP26_YEAST:114	VVVPGVKSK-VVVPGVKSK-a7-b7	HSP26_YEAST	HSP26_YEAST	intra-protein xl	114	114	0	33.74	0.038	5 min 2
HSP26_YEAST:114:x:HSP26_YEAST:117	KDIDIEYHQNK-VVVPGVKSK-a1-b7	HSP26_YEAST	HSP26_YEAST	intra-protein xl	117	114	0.59	31.52	0.033	1 min 1
HSP26_YEAST:114:x:HSP26_YEAST:117	KDIDIEYHQNK-VVVPGVKSK-a1-b7	HSP26_YEAST	HSP26_YEAST	intra-protein xl	117	114	0.67	31.05	0	1 min 2
HSP26_YEAST:114:x:HSP26_YEAST:117	KDIDIEYHQNK-VVVPGVKSK-a1-b7	HSP26_YEAST	HSP26_YEAST	intra-protein xl	117	114	0	33.59	0	30 min 1
HSP26_YEAST:114:x:HSP26_YEAST:117	KDIDIEYHQNK-VVVPGVKSK-a1-b7	HSP26_YEAST	HSP26_YEAST	intra-protein xl	117	114	0	29.1	0.03	30 min 2
HSP26_YEAST:114:x:HSP26_YEAST:117	KDIDIEYHQNK-VVVPGVKSK-a1-b7	HSP26_YEAST	HSP26_YEAST	intra-protein xl	117	114	0	33.92	0	5 min 1
HSP26_YEAST:114:x:HSP26_YEAST:117	KDIDIEYHQNK-VVVPGVKSK-a1-b7	HSP26_YEAST	HSP26_YEAST	intra-protein xl	117	114	0.64	32.93	0.038	5 min 2
HSP26_YEAST:114:x:HSP26_YEAST:145	NQILVSGEIPSTLNEESKDK-VVVPGVKSK-a18-b7	HSP26_YEAST	HSP26_YEAST	intra-protein xl	145	114	0.58	31.72	0.033	1 min 1
HSP26_YEAST:114:x:HSP26_YEAST:145	NQILVSGEIPSTLNEESKDKVK-VVVPGVKSK-a18-b7	HSP26_YEAST	HSP26_YEAST	intra-protein xl	145	114	0.75	27.17	0.017	1 min 2
HSP26_YEAST:114:x:HSP26_YEAST:145	NQILVSGEIPSTLNEESKDKVK-VVVPGVKSK-a18-b7	HSP26_YEAST	HSP26_YEAST	intra-protein xl	145	114	0.49	29.79	0.029	30 min 1
HSP26_YEAST:114:x:HSP26_YEAST:145	NQILVSGEIPSTLNEESKDK-VVVPGVKSK-a18-b7	HSP26_YEAST	HSP26_YEAST	intra-protein xl	145	114	0.63	32.7	0.03	30 min 2
HSP26_YEAST:114:x:HSP26_YEAST:145	NQILVSGEIPSTLNEESKDKVK-VVVPGVKSK-a18-b7	HSP26_YEAST	HSP26_YEAST	intra-protein xl	145	114	0.66	32.91	0	5 min 1
HSP26_YEAST:114:x:HSP26_YEAST:145	NQILVSGEIPSTLNEESKDK-VVVPGVKSK-a18-b7	HSP26_YEAST	HSP26_YEAST	intra-protein xl	145	114	0.62	31.31	0.038	5 min 2
HSP26_YEAST:114:x:HSP26_YEAST:147	NQILVSGEIPSTLNEESKDKVK-VVVPGVKSK-a20-b7	HSP26_YEAST	HSP26_YEAST	intra-protein xl	147	114	0.43	30.8	0.033	1 min 1
HSP26_YEAST:114:x:HSP26_YEAST:151	VVVPGVKSK-VKESSSGK-a7-b2	HSP26_YEAST	HSP26_YEAST	intra-protein xl	114	151	0	28.39	0.017	1 min 2
HSP26_YEAST:114:x:HSP26_YEAST:151	VVVPGVKSKK-VKESSSGK-a7-b2	HSP26_YEAST	HSP26_YEAST	intra-protein xl	114	151	0.7	31.49	0.029	30 min 1
HSP26_YEAST:114:x:HSP26_YEAST:151	VVVPGVKSKK-VKESSSGK-a7-b2	HSP26_YEAST	HSP26_YEAST	intra-protein xl	114	151	0.69	29.27	0.03	30 min 2
HSP26_YEAST:114:x:HSP26_YEAST:151	VVVPGVKSK-VKESSSGK-a7-b2	HSP26_YEAST	HSP26_YEAST	intra-protein xl	114	151	0	27.88	0.026	5 min 1
HSP26_YEAST:114:x:HSP26_YEAST:151	VVVPGVKSKK-VKESSSGK-a7-b2	HSP26_YEAST	HSP26_YEAST	intra-protein xl	114	151	0	33.99	0.038	5 min 2
HSP26_YEAST:114:x:HSP26_YEAST:157	ESSSGKFKR-VVVPGVKSK-a6-b7	HSP26_YEAST	HSP26_YEAST	intra-protein xl	157	114	0	26.56	0.045	1 min 1
HSP26_YEAST:114:x:HSP26_YEAST:157	ESSSGKFKR-VVVPGVKSK-a6-b7	HSP26_YEAST	HSP26_YEAST	intra-protein xl	157	114	0	25.28	0.017	1 min 2
HSP26_YEAST:114:x:HSP26_YEAST:157	ESSSGKFKR-VVVPGVKSK-a6-b7	HSP26_YEAST	HSP26_YEAST	intra-protein xl	157	114	0	27.8	0.049	30 min 2
HSP26_YEAST:114:x:HSP26_YEAST:157	ESSSGKFKR-VVVPGVKSK-a6-b7	HSP26_YEAST	HSP26_YEAST	intra-protein xl	157	114	0	29.07	0.026	5 min 1
HSP26_YEAST:114:x:HSP26_YEAST:50	DSTGKEVARPNNYAGALYDPR-VVVPGVKSK-a5-b7	HSP26_YEAST	HSP26_YEAST	intra-protein xl	50	114	0	33.99	0	1 min 2
HSP26_YEAST:114:x:HSP26_YEAST:50	DSTGKEVARPNNYAGALYDPR-VVVPGVKSK-a5-b7	HSP26_YEAST	HSP26_YEAST	intra-protein xl	50	114	0	33.06	0.029	30 min 1
HSP26_YEAST:114:x:HSP26_YEAST:50	DSTGKEVARPNNYAGALYDPR-VVVPGVKSK-a5-b7	HSP26_YEAST	HSP26_YEAST	intra-protein xl	50	114	0	26.8	0.065	30 min 2
HSP26_YEAST:114:x:HSP26_YEAST:50	DSTGKEVARPNNYAGALYDPR-VVVPGVKSK-a5-b7	HSP26_YEAST	HSP26_YEAST	intra-protein xl	50	114	0	27.44	0.026	5 min 1
HSP26_YEAST:114:x:HSP26_YEAST:50	DSTGKEVARPNNYAGALYDPR-VVVPGVKSK-a5-b7	HSP26_YEAST	HSP26_YEAST	intra-protein xl	50	114	0	33.96	0.038	5 min 2
HSP26_YEAST:116	SKKDIDIEYHQNK-K2-156	HSP26_YEAST	-	monolink	116	n/a	0.18	26.7	0	1 min 1
HSP26_YEAST:116	SKKDIDIEYHQNK-K2-156	HSP26_YEAST	-	monolink	116	n/a	0.2	31.16	0	30 min 1
HSP26_YEAST:116	SKKDIDIEYHQNK-K2-156	HSP26_YEAST	-	monolink	116	n/a	0.19	44.39	0	30 min 2
HSP26_YEAST:116	SKKDIDIEYHQNK-K2-156	HSP26_YEAST	-	monolink	116	n/a	0	40.3	0	5 min 2
HSP26_YEAST:116:x:HSP26_YEAST:117	SKKDIDIEYHQNK-K2-K3	HSP26_YEAST	-	looplink	116	117	0.19	40.32	0	1 min 1
HSP26_YEAST:116:x:HSP26_YEAST:117	SKKDIDIEYHQNK-K2-K3	HSP26_YEAST	-	looplink	116	117	0.23	38.62	0	1 min 2
HSP26_YEAST:116:x:HSP26_YEAST:117	SKKDIDIEYHQNK-K2-K3	HSP26_YEAST	-	looplink	116	117	0.33	38.46	0	30 min 1
HSP26_YEAST:116:x:HSP26_YEAST:117	SKKDIDIEYHQNK-K2-K3	HSP26_YEAST	-	looplink	116	117	0.42	39.81	0	30 min 2
HSP26_YEAST:116:x:HSP26_YEAST:117	SKKDIDIEYHQNK-K2-K3	HSP26_YEAST	-	looplink	116	117	0.42	36.92	0	5 min 1
HSP26_YEAST:116:x:HSP26_YEAST:117	SKKDIDIEYHQNK-K2-K3	HSP26_YEAST	-	looplink	116	117	0.32	36.63	0	5 min 2
HSP26_YEAST:116:x:HSP26_YEAST:145	NQILVSGEIPSTLNEESKDK-SKKDIDIEYHQNK-a18-b2	HSP26_YEAST	HSP26_YEAST	intra-protein xl	145	116	0.47	28.2	0.045	1 min 1
HSP26_YEAST:116:x:HSP26_YEAST:157	SKKDIDIEYHQNK-VKESSSGKFK-a2-b8	HSP26_YEAST	HSP26_YEAST	intra-protein xl	116	157	0.58	29.28	0.017	1 min 2
HSP26_YEAST:116:x:HSP26_YEAST:198	SKKDIDIEYHQNK-DGKNHVK-a2-b3	HSP26_YEAST	HSP26_YEAST	intra-protein xl	116	198	0.59	29.15	0.017	1 min 2
HSP26_YEAST:116:x:HSP26_YEAST:198	SKKDIDIEYHQNK-DGKNHVK-a2-b3	HSP26_YEAST	HSP26_YEAST	intra-protein xl	116	198	0	33.29	0	5 min 1
HSP26_YEAST:116:x:HSP26_YEAST:50	DSTGKEVARPNNYAGALYDPR-SKKDIDIEYHQNK-a5-b2	HSP26_YEAST	HSP26_YEAST	intra-protein xl	50	116	0.89	26.88	0.045	1 min 1
HSP26_YEAST:117	SKKDIDIEYHQNK-K3-156	HSP26_YEAST	-	monolink	117	n/a	0.21	40.03	0	1 min 1
HSP26_YEAST:117	SKKDIDIEYHQNK-K3-155	HSP26_YEAST	-	monolink	117	n/a	0.2	45.49	0	1 min 2
HSP26_YEAST:117	SKKDIDIEYHQNK-K3-155	HSP26_YEAST	-	monolink	117	n/a	0	41.71	0	30 min 1
HSP26_YEAST:117	SKKDIDIEYHQNK-K3-155	HSP26_YEAST	-	monolink	117	n/a	0	45.48	0	30 min 2
HSP26_YEAST:117	SKKDIDIEYHQNK-K3-155	HSP26_YEAST	-	monolink	117	n/a	0.15	46.6	0	5 min 1
HSP26_YEAST:117	SKKDIDIEYHQNK-K3-155	HSP26_YEAST	-	monolink	117	n/a	0.3	37.64	0	5 min 2
HSP26_YEAST:117:x:HSP26_YEAST:145	NQILVSGEIPSTLNEESKDK-SKKDIDIEYHQNK-a18-b3	HSP26_YEAST	HSP26_YEAST	intra-protein xl	145	117	0.62	26.54	0.017	1 min 2
HSP26_YEAST:117:x:HSP26_YEAST:145	NQILVSGEIPSTLNEESKDK-SKKDIDIEYHQNK-a18-b3	HSP26_YEAST	HSP26_YEAST	intra-protein xl	145	117	0.37	27.17	0.034	30 min 1
HSP26_YEAST:117:x:HSP26_YEAST:145	NQILVSGEIPSTLNEESKDK-SKKDIDIEYHQNK-a18-b3	HSP26_YEAST	HSP26_YEAST	intra-protein xl	145	117	0.33	28.67	0.026	5 min 1
HSP26_YEAST:117:x:HSP26_YEAST:151	KDIDIEYHQNK-VKESSSGK-a1-b2	HSP26_YEAST	HSP26_YEAST	intra-protein xl	117	151	0.73	28.06	0.017	1 min 2
HSP26_YEAST:117:x:HSP26_YEAST:151	KDIDIEYHQNK-VKESSSGK-a1-b2	HSP26_YEAST	HSP26_YEAST	intra-protein xl	117	151	0	29.2	0.029	30 min 1
HSP26_YEAST:117:x:HSP26_YEAST:151	KDIDIEYHQNK-VKESSSGK-a1-b2	HSP26_YEAST	HSP26_YEAST	intra-protein xl	117	151	0.41	32.91	0.03	30 min 2
HSP26_YEAST:117:x:HSP26_YEAST:157	SKKDIDIEYHQNK-VKESSSGKFK-a3-b8	HSP26_YEAST	HSP26_YEAST	intra-protein xl	117	157	0.65	36.14	0	1 min 1
HSP26_YEAST:117:x:HSP26_YEAST:157	KDIDIEYHQNK-VKESSSGKFK-a1-b8	HSP26_YEAST	HSP26_YEAST	intra-protein xl	117	157	0.71	32.01	0	1 min 2
HSP26_YEAST:117:x:HSP26_YEAST:157	KDIDIEYHQNK-VKESSSGKFK-a1-b8	HSP26_YEAST	HSP26_YEAST	intra-protein xl	117	157	0.75	32.33	0.029	30 min 1
HSP26_YEAST:117:x:HSP26_YEAST:157	KDIDIEYHQNK-VKESSSGKFK-a1-b8	HSP26_YEAST	HSP26_YEAST	intra-protein xl	117	157	0.66	34.89	0.03	30 min 2
HSP26_YEAST:117:x:HSP26_YEAST:157	SKKDIDIEYHQNK-VKESSSGKFK-a3-b8	HSP26_YEAST	HSP26_YEAST	intra-protein xl	117	157	0.67	34.46	0	5 min 1
HSP26_YEAST:117:x:HSP26_YEAST:157	SKKDIDIEYHQNK-ESSSGKFKR-a3-b6	HSP26_YEAST	HSP26_YEAST	intra-protein xl	117	157	0	34.01	0.038	5 min 2
HSP26_YEAST:117:x:HSP26_YEAST:195	KDIDIEYHQNK-LKPQKDGK-a1-b5	HSP26_YEAST	HSP26_YEAST	intra-protein xl	117	195	0.56	33.76	0.033	1 min 1
HSP26_YEAST:117:x:HSP26_YEAST:195	KDIDIEYHQNK-LKPQKDGK-a1-b5	HSP26_YEAST	HSP26_YEAST	intra-protein xl	117	195	0.51	34.27	0	1 min 2
HSP26_YEAST:117:x:HSP26_YEAST:195	KDIDIEYHQNK-LKPQKDGK-a1-b5	HSP26_YEAST	HSP26_YEAST	intra-protein xl	117	195	0	31.47	0.029	30 min 1
HSP26_YEAST:117:x:HSP26_YEAST:195	KDIDIEYHQNK-LKPQKDGK-a1-b5	HSP26_YEAST	HSP26_YEAST	intra-protein xl	117	195	0.53	34.9	0.03	30 min 2
HSP26_YEAST:117:x:HSP26_YEAST:195	SKKDIDIEYHQNK-LKPQKDGK-a3-b5	HSP26_YEAST	HSP26_YEAST	intra-protein xl	117	195	0.51	32.67	0	5 min 1
HSP26_YEAST:117:x:HSP26_YEAST:195	KDIDIEYHQNK-LKPQKDGK-a1-b5	HSP26_YEAST	HSP26_YEAST	intra-protein xl	117	195	0	32.98	0.038	5 min 2
HSP26_YEAST:117:x:HSP26_YEAST:198	SKKDIDIEYHQNK-DGKNHVK-a3-b3	HSP26_YEAST	HSP26_YEAST	intra-protein xl	117	198	0	40.49	0	1 min 1
HSP26_YEAST:117:x:HSP26_YEAST:198	SKKDIDIEYHQNK-DGKNHVK-a3-b3	HSP26_YEAST	HSP26_YEAST	intra-protein xl	117	198	0	36.08	0	1 min 2
HSP26_YEAST:117:x:HSP26_YEAST:198	SKKDIDIEYHQNK-DGKNHVK-a3-b3	HSP26_YEAST	HSP26_YEAST	intra-protein xl	117	198	0.55	40.63	0	30 min 1
HSP26_YEAST:117:x:HSP26_YEAST:198	SKKDIDIEYHQNK-DGKNHVK-a3-b3	HSP26_YEAST	HSP26_YEAST	intra-protein xl	117	198	0	35.71	0	30 min 2
HSP26_YEAST:117:x:HSP26_YEAST:198	KDIDIEYHQNK-DGKNHVK-a1-b3	HSP26_YEAST	HSP26_YEAST	intra-protein xl	117	198	0.24	39.85	0	5 min 1
HSP26_YEAST:117:x:HSP26_YEAST:198	SKKDIDIEYHQNK-DGKNHVK-a3-b3	HSP26_YEAST	HSP26_YEAST	intra-protein xl	117	198	0	38.15	0	5 min 2
HSP26_YEAST:117:x:HSP26_YEAST:45	RQLANTPAKDSTGK-SKKDIDIEYHQNK-a9-b3	HSP26_YEAST	HSP26_YEAST	intra-protein xl	45	117	0	30.37	0.033	1 min 1
HSP26_YEAST:117:x:HSP26_YEAST:45	RQLANTPAKDSTGK-SKKDIDIEYHQNK-a9-b3	HSP26_YEAST	HSP26_YEAST	intra-protein xl	45	117	0	26.36	0.017	1 min 2
HSP26_YEAST:127	DIDIEYHQNKNQILVSGEIPSTLNEESKDK-K10-155	HSP26_YEAST	-	monolink	127	n/a	0.14	29.4	0	1 min 1
HSP26_YEAST:127	DIDIEYHQNKNQILVSGEIPSTLNEESKDK-K10-155	HSP26_YEAST	-	monolink	127	n/a	0.12	35.26	0	1 min 2
HSP26_YEAST:127	DIDIEYHQNKNQILVSGEIPSTLNEESKDK-K10-155	HSP26_YEAST	-	monolink	127	n/a	0.1	36.15	0	30 min 1
HSP26_YEAST:127	DIDIEYHQNKNQILVSGEIPSTLNEESKDK-K10-155	HSP26_YEAST	-	monolink	127	n/a	0.14	35.48	0	30 min 2
HSP26_YEAST:127	DIDIEYHQNKNQILVSGEIPSTLNEESKDK-K10-155	HSP26_YEAST	-	monolink	127	n/a	0.11	34.36	0	5 min 1
HSP26_YEAST:127	DIDIEYHQNKNQILVSGEIPSTLNEESKDK-K10-156	HSP26_YEAST	-	monolink	127	n/a	0.07	33.27	0	5 min 2
HSP26_YEAST:127:x:HSP26_YEAST:195	DIDIEYHQNKNQILVSGEIPSTLNEESK-LKPQKDGK-a10-b5	HSP26_YEAST	HSP26_YEAST	intra-protein xl	127	195	0.34	28.13	0.049	30 min 2
HSP26_YEAST:127:x:HSP26_YEAST:198	DIDIEYHQNKNQILVSGEIPSTLNEESKDK-DGKNHVK-a10-b3	HSP26_YEAST	HSP26_YEAST	intra-protein xl	127	198	0.37	25.56	0.034	30 min 1
HSP26_YEAST:145	NQILVSGEIPSTLNEESKDK-K18-156	HSP26_YEAST	-	monolink	145	n/a	0.29	39.49	0	1 min 1
HSP26_YEAST:145	NQILVSGEIPSTLNEESKDK-K18-156	HSP26_YEAST	-	monolink	145	n/a	0.27	39.06	0	1 min 2
HSP26_YEAST:145	NQILVSGEIPSTLNEESKDK-K18-155	HSP26_YEAST	-	monolink	145	n/a	0.21	43.1	0	30 min 1
HSP26_YEAST:145	NQILVSGEIPSTLNEESKDK-K18-156	HSP26_YEAST	-	monolink	145	n/a	0.39	39.62	0	30 min 2
HSP26_YEAST:145	NQILVSGEIPSTLNEESKDK-K18-155	HSP26_YEAST	-	monolink	145	n/a	0.37	44.76	0	5 min 1
HSP26_YEAST:145	NQILVSGEIPSTLNEESKDK-K18-156	HSP26_YEAST	-	monolink	145	n/a	0.32	39.56	0	5 min 2
HSP26_YEAST:145:x:HSP26_YEAST:145	NQILVSGEIPSTLNEESKDK-NQILVSGEIPSTLNEESKDK-a18-b18	HSP26_YEAST	HSP26_YEAST	intra-protein xl	145	145	0.74	31.42	0	1 min 2
HSP26_YEAST:145:x:HSP26_YEAST:145	NQILVSGEIPSTLNEESKDKVK-NQILVSGEIPSTLNEESKDK-a18-b18	HSP26_YEAST	HSP26_YEAST	intra-protein xl	145	145	0.81	29.86	0.026	5 min 1
HSP26_YEAST:145:x:HSP26_YEAST:145	NQILVSGEIPSTLNEESKDK-NQILVSGEIPSTLNEESKDK-a18-b18	HSP26_YEAST	HSP26_YEAST	intra-protein xl	145	145	0.79	28.18	0.056	5 min 2
HSP26_YEAST:145:x:HSP26_YEAST:147	NQILVSGEIPSTLNEESKDKVK-K18-K20	HSP26_YEAST	-	looplink	145	147	0.37	39.39	0	1 min 2
HSP26_YEAST:145:x:HSP26_YEAST:147	NQILVSGEIPSTLNEESKDKVK-K18-K20	HSP26_YEAST	-	looplink	145	147	0.39	31.74	0	5 min 1
HSP26_YEAST:145:x:HSP26_YEAST:147	NQILVSGEIPSTLNEESKDKVK-K18-K20	HSP26_YEAST	-	looplink	145	147	0.4	38.09	0	5 min 2
HSP26_YEAST:145:x:HSP26_YEAST:149	NQILVSGEIPSTLNEESKDKVK-K18-K22	HSP26_YEAST	-	looplink	145	149	0.38	33.18	0	30 min 2
HSP26_YEAST:145:x:HSP26_YEAST:149	NQILVSGEIPSTLNEESKDKVK-K18-K22	HSP26_YEAST	-	looplink	145	149	0.35	35.36	0	5 min 2
HSP26_YEAST:145:x:HSP26_YEAST:151	NQILVSGEIPSTLNEESKDK-VKESSSGK-a18-b2	HSP26_YEAST	HSP26_YEAST	intra-protein xl	145	151	0.93	29.83	0.033	1 min 1
HSP26_YEAST:145:x:HSP26_YEAST:151	NQILVSGEIPSTLNEESKDK-VKESSSGK-a18-b2	HSP26_YEAST	HSP26_YEAST	intra-protein xl	145	151	0.47	26.19	0.017	1 min 2
HSP26_YEAST:145:x:HSP26_YEAST:151	NQILVSGEIPSTLNEESKDK-VKVKESSSGK-a18-b4	HSP26_YEAST	HSP26_YEAST	intra-protein xl	145	151	0.88	32.22	0.029	30 min 1
HSP26_YEAST:145:x:HSP26_YEAST:151	NQILVSGEIPSTLNEESKDKVK-VKESSSGKFK-a18-b2	HSP26_YEAST	HSP26_YEAST	intra-protein xl	145	151	0.94	28.43	0.049	30 min 2
HSP26_YEAST:145:x:HSP26_YEAST:151	NQILVSGEIPSTLNEESKDK-VKESSSGK-a18-b2	HSP26_YEAST	HSP26_YEAST	intra-protein xl	145	151	0.37	27.35	0.026	5 min 1
HSP26_YEAST:145:x:HSP26_YEAST:151	NQILVSGEIPSTLNEESKDK-VKVKESSSGK-a18-b4	HSP26_YEAST	HSP26_YEAST	intra-protein xl	145	151	0.93	32.53	0.038	5 min 2
HSP26_YEAST:145:x:HSP26_YEAST:157	NQILVSGEIPSTLNEESKDKVK-VKESSSGKFK-a18-b8	HSP26_YEAST	HSP26_YEAST	intra-protein xl	145	157	0.58	25.4	0.017	1 min 2
HSP26_YEAST:145:x:HSP26_YEAST:157	NQILVSGEIPSTLNEESKDK-ESSSGKFKR-a18-b6	HSP26_YEAST	HSP26_YEAST	intra-protein xl	145	157	0.48	27.24	0.034	30 min 1
HSP26_YEAST:145:x:HSP26_YEAST:157	NQILVSGEIPSTLNEESKDK-VKESSSGKFK-a18-b8	HSP26_YEAST	HSP26_YEAST	intra-protein xl	145	157	0.45	25.14	0.067	30 min 2
HSP26_YEAST:145:x:HSP26_YEAST:195	NQILVSGEIPSTLNEESKDKVK-LKPQKDGK-a18-b5	HSP26_YEAST	HSP26_YEAST	intra-protein xl	145	195	0.61	31.28	0.033	1 min 1
HSP26_YEAST:145:x:HSP26_YEAST:195	NQILVSGEIPSTLNEESKDKVK-LKPQKDGK-a18-b5	HSP26_YEAST	HSP26_YEAST	intra-protein xl	145	195	0.67	29.26	0.029	30 min 1
HSP26_YEAST:145:x:HSP26_YEAST:195	NQILVSGEIPSTLNEESKDKVK-LKPQKDGK-a18-b5	HSP26_YEAST	HSP26_YEAST	intra-protein xl	145	195	0.69	27.04	0.065	30 min 2
HSP26_YEAST:145:x:HSP26_YEAST:195	NQILVSGEIPSTLNEESKDK-LKPQKDGK-a18-b5	HSP26_YEAST	HSP26_YEAST	intra-protein xl	145	195	0.59	29.09	0.026	5 min 1
HSP26_YEAST:145:x:HSP26_YEAST:195	NQILVSGEIPSTLNEESKDKVK-LKPQKDGK-a18-b5	HSP26_YEAST	HSP26_YEAST	intra-protein xl	145	195	0.43	25.5	0.074	5 min 2
HSP26_YEAST:145:x:HSP26_YEAST:45	NQILVSGEIPSTLNEESKDKVK-RQLANTPAKDSTGK-a18-b9	HSP26_YEAST	HSP26_YEAST	intra-protein xl	145	45	0.54	30.01	0.033	1 min 1
HSP26_YEAST:145:x:HSP26_YEAST:45	NQILVSGEIPSTLNEESKDK-QLANTPAKDSTGK-a18-b8	HSP26_YEAST	HSP26_YEAST	intra-protein xl	145	45	0.64	32.1	0	1 min 2
HSP26_YEAST:145:x:HSP26_YEAST:45	NQILVSGEIPSTLNEESKDK-QLANTPAKDSTGK-a18-b8	HSP26_YEAST	HSP26_YEAST	intra-protein xl	145	45	0.71	29.71	0.029	30 min 1
HSP26_YEAST:145:x:HSP26_YEAST:45	NQILVSGEIPSTLNEESKDK-RQLANTPAKDSTGK-a18-b9	HSP26_YEAST	HSP26_YEAST	intra-protein xl	145	45	0	26.02	0.067	30 min 2
HSP26_YEAST:145:x:HSP26_YEAST:45	NQILVSGEIPSTLNEESKDK-QLANTPAKDSTGK-a18-b8	HSP26_YEAST	HSP26_YEAST	intra-protein xl	145	45	0.7	29.97	0.026	5 min 1
HSP26_YEAST:145:x:HSP26_YEAST:45	NQILVSGEIPSTLNEESKDK-RQLANTPAKDSTGK-a18-b9	HSP26_YEAST	HSP26_YEAST	intra-protein xl	145	45	0.47	28.46	0.056	5 min 2
HSP26_YEAST:145:x:HSP26_YEAST:50	DSTGKEVARPNNYAGALYDPR-NQILVSGEIPSTLNEESKDK-a5-b18	HSP26_YEAST	HSP26_YEAST	intra-protein xl	50	145	0.59	27.18	0.045	1 min 1
HSP26_YEAST:145:x:HSP26_YEAST:50	DSTGKEVARPNNYAGALYDPR-NQILVSGEIPSTLNEESKDK-a5-b18	HSP26_YEAST	HSP26_YEAST	intra-protein xl	50	145	0.44	28.48	0.049	30 min 2
HSP26_YEAST:147	NQILVSGEIPSTLNEESKDKVK-K20-155	HSP26_YEAST	-	monolink	147	n/a	0.24	29.07	0	1 min 1
HSP26_YEAST:147	NQILVSGEIPSTLNEESKDKVK-K20-155	HSP26_YEAST	-	monolink	147	n/a	0.53	34.89	0	1 min 2
HSP26_YEAST:147	NQILVSGEIPSTLNEESKDKVK-K20-156	HSP26_YEAST	-	monolink	147	n/a	0.32	38.22	0	30 min 1
HSP26_YEAST:147	NQILVSGEIPSTLNEESKDKVK-K20-156	HSP26_YEAST	-	monolink	147	n/a	0.27	31.43	0	30 min 2
HSP26_YEAST:147:x:HSP26_YEAST:195	NQILVSGEIPSTLNEESKDKVK-LKPQKDGK-a20-b5	HSP26_YEAST	HSP26_YEAST	intra-protein xl	147	195	0.66	26.47	0.017	1 min 2
HSP26_YEAST:149	NQILVSGEIPSTLNEESKDKVK-K22-155	HSP26_YEAST	-	monolink	149	n/a	0.3	31.33	0	30 min 2
HSP26_YEAST:151:x:HSP26_YEAST:45	RQLANTPAKDSTGK-VKESSSGK-a9-b2	HSP26_YEAST	HSP26_YEAST	intra-protein xl	45	151	0	39.4	0	1 min 1
HSP26_YEAST:151:x:HSP26_YEAST:45	RQLANTPAKDSTGK-VKESSSGK-a9-b2	HSP26_YEAST	HSP26_YEAST	intra-protein xl	45	151	0	35.96	0	1 min 2
HSP26_YEAST:151:x:HSP26_YEAST:45	RQLANTPAKDSTGK-VKESSSGK-a9-b2	HSP26_YEAST	HSP26_YEAST	intra-protein xl	45	151	0	33.3	0.029	30 min 1
HSP26_YEAST:151:x:HSP26_YEAST:45	RQLANTPAKDSTGK-VKESSSGK-a9-b2	HSP26_YEAST	HSP26_YEAST	intra-protein xl	45	151	0	41.74	0	30 min 2
HSP26_YEAST:151:x:HSP26_YEAST:45	RQLANTPAKDSTGK-VKESSSGK-a9-b2	HSP26_YEAST	HSP26_YEAST	intra-protein xl	45	151	0	38.38	0	5 min 1
HSP26_YEAST:151:x:HSP26_YEAST:45	RQLANTPAKDSTGK-VKESSSGK-a9-b2	HSP26_YEAST	HSP26_YEAST	intra-protein xl	45	151	0	38.02	0	5 min 2
HSP26_YEAST:151:x:HSP26_YEAST:50	DSTGKEVARPNNYAGALYDPR-VKESSSGK-a5-b2	HSP26_YEAST	HSP26_YEAST	intra-protein xl	50	151	0.85	39.76	0	1 min 1
HSP26_YEAST:151:x:HSP26_YEAST:50	DSTGKEVARPNNYAGALYDPR-VKESSSGK-a5-b2	HSP26_YEAST	HSP26_YEAST	intra-protein xl	50	151	0	33.29	0	1 min 2
HSP26_YEAST:151:x:HSP26_YEAST:50	DSTGKEVARPNNYAGALYDPR-VKESSSGK-a5-b2	HSP26_YEAST	HSP26_YEAST	intra-protein xl	50	151	0.85	31.4	0.029	30 min 1
HSP26_YEAST:151:x:HSP26_YEAST:50	DSTGKEVARPNNYAGALYDPR-VKESSSGK-a5-b2	HSP26_YEAST	HSP26_YEAST	intra-protein xl	50	151	0	34.31	0.03	30 min 2
HSP26_YEAST:151:x:HSP26_YEAST:50	DSTGKEVARPNNYAGALYDPR-VKESSSGK-a5-b2	HSP26_YEAST	HSP26_YEAST	intra-protein xl	50	151	0	35.73	0	5 min 1
HSP26_YEAST:151:x:HSP26_YEAST:50	DSTGKEVARPNNYAGALYDPR-VKESSSGK-a5-b2	HSP26_YEAST	HSP26_YEAST	intra-protein xl	50	151	0	34.77	0.038	5 min 2
HSP26_YEAST:157	VKESSSGKFK-K8-155	HSP26_YEAST	-	monolink	157	n/a	0.39	35.46	0	1 min 1
HSP26_YEAST:157	VKESSSGKFK-K8-155	HSP26_YEAST	-	monolink	157	n/a	0.33	37.55	0	1 min 2
HSP26_YEAST:157	VKESSSGKFK-K8-155	HSP26_YEAST	-	monolink	157	n/a	0.38	36.78	0	30 min 1
HSP26_YEAST:157	VKESSSGKFK-K8-155	HSP26_YEAST	-	monolink	157	n/a	0.49	32.26	0	30 min 2
HSP26_YEAST:157	VKESSSGKFK-K8-155	HSP26_YEAST	-	monolink	157	n/a	0.34	33.46	0	5 min 1
HSP26_YEAST:157	VKESSSGKFK-K8-155	HSP26_YEAST	-	monolink	157	n/a	0.35	35.67	0	5 min 2
HSP26_YEAST:157:x:HSP26_YEAST:45	QLANTPAKDSTGK-VKESSSGKFK-a8-b8	HSP26_YEAST	HSP26_YEAST	intra-protein xl	45	157	0.87	29.99	0.029	30 min 1
HSP26_YEAST:157:x:HSP26_YEAST:45	RQLANTPAKDSTGK-VKESSSGKFK-a9-b8	HSP26_YEAST	HSP26_YEAST	intra-protein xl	45	157	0.52	25.91	0.067	30 min 2
HSP26_YEAST:157:x:HSP26_YEAST:50	DSTGKEVARPNNYAGALYDPR-ESSSGKFK-a5-b6	HSP26_YEAST	HSP26_YEAST	intra-protein xl	50	157	0	25.98	0.017	1 min 2
HSP26_YEAST:157:x:HSP26_YEAST:50	DSTGKEVARPNNYAGALYDPR-ESSSGKFK-a5-b6	HSP26_YEAST	HSP26_YEAST	intra-protein xl	50	157	0	32.5	0.03	30 min 2
HSP26_YEAST:159	FKRVITLPDYPGVDADNIK-K2-156	HSP26_YEAST	-	monolink	159	n/a	0	31.5	0	1 min 1
HSP26_YEAST:159	FKRVITLPDYPGVDADNIK-K2-156	HSP26_YEAST	-	monolink	159	n/a	0	26.06	0	1 min 2
HSP26_YEAST:159	FKRVITLPDYPGVDADNIK-K2-156	HSP26_YEAST	-	monolink	159	n/a	0	30.77	0	30 min 1
HSP26_YEAST:159	FKRVITLPDYPGVDADNIK-K2-156	HSP26_YEAST	-	monolink	159	n/a	0	33.82	0	30 min 2
HSP26_YEAST:159	FKRVITLPDYPGVDADNIK-K2-156	HSP26_YEAST	-	monolink	159	n/a	0	33.61	0	5 min 1
HSP26_YEAST:159	FKRVITLPDYPGVDADNIK-K2-156	HSP26_YEAST	-	monolink	159	n/a	0	29.78	0	5 min 2
HSP26_YEAST:159:x:HSP26_YEAST:45	QLANTPAKDSTGK-ESSSGKFKR-a8-b8	HSP26_YEAST	HSP26_YEAST	intra-protein xl	45	159	0.67	27.59	0.017	1 min 2
HSP26_YEAST:159:x:HSP26_YEAST:50	DSTGKEVARPNNYAGALYDPR-ESSSGKFKR-a5-b8	HSP26_YEAST	HSP26_YEAST	intra-protein xl	50	159	0	31.96	0	1 min 2
HSP26_YEAST:176	RVITLPDYPGVDADNIKADYANGVLTLTVPK-K17-155	HSP26_YEAST	-	monolink	176	n/a	0	37.12	0	1 min 1
HSP26_YEAST:176	RVITLPDYPGVDADNIKADYANGVLTLTVPK-K17-155	HSP26_YEAST	-	monolink	176	n/a	0	35.56	0	1 min 2
HSP26_YEAST:176	RVITLPDYPGVDADNIKADYANGVLTLTVPK-K17-155	HSP26_YEAST	-	monolink	176	n/a	0	32.91	0	5 min 1
HSP26_YEAST:190	ADYANGVLTLTVPKLKPQK-K14-155	HSP26_YEAST	-	monolink	190	n/a	0	32.07	0	1 min 2
HSP26_YEAST:190	ADYANGVLTLTVPKLKPQK-K14-155	HSP26_YEAST	-	monolink	190	n/a	0	30.61	0	30 min 1
HSP26_YEAST:190	ADYANGVLTLTVPKLKPQK-K14-155	HSP26_YEAST	-	monolink	190	n/a	0	34.64	0	30 min 2
HSP26_YEAST:190	ADYANGVLTLTVPKLKPQK-K14-155	HSP26_YEAST	-	monolink	190	n/a	0	30.39	0	5 min 1
HSP26_YEAST:190	ADYANGVLTLTVPKLKPQK-K14-155	HSP26_YEAST	-	monolink	190	n/a	0	30.49	0	5 min 2
HSP26_YEAST:190:x:HSP26_YEAST:192	ADYANGVLTLTVPKLKPQK-K14-K16	HSP26_YEAST	-	looplink	190	192	0	27.5	0	1 min 1
HSP26_YEAST:190:x:HSP26_YEAST:192	ADYANGVLTLTVPKLKPQK-K14-K16	HSP26_YEAST	-	looplink	190	192	0	31.46	0	1 min 2
HSP26_YEAST:190:x:HSP26_YEAST:192	ADYANGVLTLTVPKLKPQK-K14-K16	HSP26_YEAST	-	looplink	190	192	0	30.18	0	30 min 1
HSP26_YEAST:190:x:HSP26_YEAST:192	ADYANGVLTLTVPKLKPQK-K14-K16	HSP26_YEAST	-	looplink	190	192	0	33.88	0	30 min 2
HSP26_YEAST:190:x:HSP26_YEAST:192	ADYANGVLTLTVPKLKPQK-K14-K16	HSP26_YEAST	-	looplink	190	192	0	35.1	0	5 min 1
HSP26_YEAST:190:x:HSP26_YEAST:192	ADYANGVLTLTVPKLKPQK-K14-K16	HSP26_YEAST	-	looplink	190	192	0	31.71	0	5 min 2
HSP26_YEAST:190:x:HSP26_YEAST:195	ADYANGVLTLTVPKLKPQK-K14-K19	HSP26_YEAST	-	looplink	190	195	0	32.24	0	1 min 2
HSP26_YEAST:190:x:HSP26_YEAST:195	ADYANGVLTLTVPKLKPQK-K14-K19	HSP26_YEAST	-	looplink	190	195	0	34.33	0	30 min 1
HSP26_YEAST:192	ADYANGVLTLTVPKLKPQK-K16-155	HSP26_YEAST	-	monolink	192	n/a	0	33.06	0	1 min 1
HSP26_YEAST:192	ADYANGVLTLTVPKLKPQK-K16-155	HSP26_YEAST	-	monolink	192	n/a	0	33.07	0	30 min 2
HSP26_YEAST:192	ADYANGVLTLTVPKLKPQK-K16-155	HSP26_YEAST	-	monolink	192	n/a	0	29.83	0	5 min 1
HSP26_YEAST:192	ADYANGVLTLTVPKLKPQK-K16-155	HSP26_YEAST	-	monolink	192	n/a	0	30.57	0	5 min 2
HSP26_YEAST:192:x:HSP26_YEAST:195	LKPQKDGK-LKPQKDGK-a2-b5	HSP26_YEAST	HSP26_YEAST	intra-protein xl	192	195	0	27.29	0.045	1 min 1
HSP26_YEAST:192:x:HSP26_YEAST:195	LKPQKDGK-LKPQKDGK-a2-b5	HSP26_YEAST	HSP26_YEAST	intra-protein xl	192	195	0	25.64	0.017	1 min 2
HSP26_YEAST:192:x:HSP26_YEAST:195	LKPQKDGK-LKPQKDGK-a2-b5	HSP26_YEAST	HSP26_YEAST	intra-protein xl	192	195	0	28.77	0.034	30 min 1
HSP26_YEAST:192:x:HSP26_YEAST:195	LKPQKDGK-LKPQKDGK-a2-b5	HSP26_YEAST	HSP26_YEAST	intra-protein xl	192	195	0	29.41	0.03	30 min 2
HSP26_YEAST:195:x:HSP26_YEAST:195	LKPQKDGK-LKPQKDGK-a5-b5	HSP26_YEAST	HSP26_YEAST	intra-protein xl	195	195	0	29.71	0.033	1 min 1
HSP26_YEAST:195:x:HSP26_YEAST:198	LKPQKDGKNHVK-K5-K8	HSP26_YEAST	-	looplink	195	198	0	31.53	0	1 min 1
HSP26_YEAST:195:x:HSP26_YEAST:198	LKPQKDGK-DGKNHVK-a5-b3	HSP26_YEAST	HSP26_YEAST	intra-protein xl	195	198	0	29.46	0.033	1 min 1
HSP26_YEAST:195:x:HSP26_YEAST:198	LKPQKDGKNHVK-K5-K8	HSP26_YEAST	-	looplink	195	198	0	31.59	0	1 min 2
HSP26_YEAST:195:x:HSP26_YEAST:198	LKPQKDGK-DGKNHVK-a5-b3	HSP26_YEAST	HSP26_YEAST	intra-protein xl	195	198	0	31.22	0	1 min 2
HSP26_YEAST:195:x:HSP26_YEAST:198	LKPQKDGKNHVK-K5-K8	HSP26_YEAST	-	looplink	195	198	0	33.29	0	30 min 1
HSP26_YEAST:195:x:HSP26_YEAST:198	LKPQKDGK-DGKNHVK-a5-b3	HSP26_YEAST	HSP26_YEAST	intra-protein xl	195	198	0	30.3	0.029	30 min 1
HSP26_YEAST:195:x:HSP26_YEAST:198	LKPQKDGK-DGKNHVK-a5-b3	HSP26_YEAST	HSP26_YEAST	intra-protein xl	195	198	0	30.46	0.03	30 min 2
HSP26_YEAST:195:x:HSP26_YEAST:198	LKPQKDGK-DGKNHVK-a5-b3	HSP26_YEAST	HSP26_YEAST	intra-protein xl	195	198	0	25.78	0.073	5 min 1
HSP26_YEAST:195:x:HSP26_YEAST:198	LKPQKDGKNHVK-K5-K8	HSP26_YEAST	-	looplink	195	198	0	32.46	0	5 min 2
HSP26_YEAST:195:x:HSP26_YEAST:198	LKPQKDGK-DGKNHVK-a5-b3	HSP26_YEAST	HSP26_YEAST	intra-protein xl	195	198	0	29.88	0.038	5 min 2
HSP26_YEAST:195:x:HSP26_YEAST:203	KIEVSSQESWGN-LKPQKDGK-a1-b5	HSP26_YEAST	HSP26_YEAST	intra-protein xl	203	195	0	32.27	0.033	1 min 1
HSP26_YEAST:195:x:HSP26_YEAST:203	KIEVSSQESWGN-LKPQKDGK-a1-b5	HSP26_YEAST	HSP26_YEAST	intra-protein xl	203	195	0	32.78	0	1 min 2
HSP26_YEAST:195:x:HSP26_YEAST:203	KIEVSSQESWGN-LKPQKDGK-a1-b5	HSP26_YEAST	HSP26_YEAST	intra-protein xl	203	195	0	32.93	0.029	30 min 1
HSP26_YEAST:195:x:HSP26_YEAST:203	KIEVSSQESWGN-LKPQKDGK-a1-b5	HSP26_YEAST	HSP26_YEAST	intra-protein xl	203	195	0.4	32.89	0.03	30 min 2
HSP26_YEAST:195:x:HSP26_YEAST:203	KIEVSSQESWGN-LKPQKDGK-a1-b5	HSP26_YEAST	HSP26_YEAST	intra-protein xl	203	195	0	31.62	0	5 min 1
HSP26_YEAST:195:x:HSP26_YEAST:45	RQLANTPAKDSTGK-LKPQKDGK-a9-b5	HSP26_YEAST	HSP26_YEAST	intra-protein xl	45	195	0	25.42	0.059	1 min 1
HSP26_YEAST:195:x:HSP26_YEAST:45	QLANTPAKDSTGK-LKPQKDGK-a8-b5	HSP26_YEAST	HSP26_YEAST	intra-protein xl	45	195	0.07	27.08	0.017	1 min 2
HSP26_YEAST:195:x:HSP26_YEAST:45	RQLANTPAKDSTGK-LKPQKDGK-a9-b5	HSP26_YEAST	HSP26_YEAST	intra-protein xl	45	195	0	26.83	0.034	30 min 1
HSP26_YEAST:195:x:HSP26_YEAST:45	RQLANTPAKDSTGK-LKPQKDGK-a9-b5	HSP26_YEAST	HSP26_YEAST	intra-protein xl	45	195	0	26.8	0.065	30 min 2
HSP26_YEAST:195:x:HSP26_YEAST:50	DSTGKEVARPNNYAGALYDPR-LKPQKDGK-a5-b5	HSP26_YEAST	HSP26_YEAST	intra-protein xl	50	195	0	30.86	0.033	1 min 1
HSP26_YEAST:195:x:HSP26_YEAST:50	DSTGKEVARPNNYAGALYDPR-LKPQKDGK-a5-b5	HSP26_YEAST	HSP26_YEAST	intra-protein xl	50	195	0	28.86	0.034	30 min 1
HSP26_YEAST:195:x:HSP26_YEAST:50	DSTGKEVARPNNYAGALYDPR-LKPQKDGK-a5-b5	HSP26_YEAST	HSP26_YEAST	intra-protein xl	50	195	0	30.51	0.03	30 min 2
HSP26_YEAST:195:x:HSP26_YEAST:50	DSTGKEVARPNNYAGALYDPR-LKPQKDGK-a5-b5	HSP26_YEAST	HSP26_YEAST	intra-protein xl	50	195	0	32.86	0	5 min 1
HSP26_YEAST:195:x:HSP26_YEAST:50	DSTGKEVARPNNYAGALYDPR-LKPQKDGK-a5-b5	HSP26_YEAST	HSP26_YEAST	intra-protein xl	50	195	0	29.61	0.038	5 min 2
HSP26_YEAST:198	LKPQKDGKNHVK-K8-156	HSP26_YEAST	-	monolink	198	n/a	0	29.39	0	1 min 2
HSP26_YEAST:198:x:HSP26_YEAST:198	DGKNHVK-DGKNHVK-a3-b3	HSP26_YEAST	HSP26_YEAST	intra-protein xl	198	198	0	33.83	0.033	1 min 1
HSP26_YEAST:198:x:HSP26_YEAST:198	DGKNHVK-DGKNHVK-a3-b3	HSP26_YEAST	HSP26_YEAST	intra-protein xl	198	198	0	34.57	0	1 min 2
HSP26_YEAST:198:x:HSP26_YEAST:198	DGKNHVK-DGKNHVK-a3-b3	HSP26_YEAST	HSP26_YEAST	intra-protein xl	198	198	0	33.77	0	30 min 1
HSP26_YEAST:198:x:HSP26_YEAST:198	DGKNHVK-DGKNHVK-a3-b3	HSP26_YEAST	HSP26_YEAST	intra-protein xl	198	198	0	27.45	0.049	30 min 2
HSP26_YEAST:198:x:HSP26_YEAST:198	DGKNHVK-DGKNHVK-a3-b3	HSP26_YEAST	HSP26_YEAST	intra-protein xl	198	198	0	31.76	0	5 min 1
HSP26_YEAST:198:x:HSP26_YEAST:198	DGKNHVK-DGKNHVK-a3-b3	HSP26_YEAST	HSP26_YEAST	intra-protein xl	198	198	0	32.36	0.038	5 min 2
HSP26_YEAST:198:x:HSP26_YEAST:203	KIEVSSQESWGN-DGKNHVK-a1-b3	HSP26_YEAST	HSP26_YEAST	intra-protein xl	203	198	0.26	31.84	0.029	30 min 1
HSP26_YEAST:198:x:HSP26_YEAST:203	KIEVSSQESWGN-DGKNHVK-a1-b3	HSP26_YEAST	HSP26_YEAST	intra-protein xl	203	198	0.25	28.31	0.049	30 min 2
HSP26_YEAST:198:x:HSP26_YEAST:45	RQLANTPAKDSTGK-DGKNHVK-a9-b3	HSP26_YEAST	HSP26_YEAST	intra-protein xl	45	198	0	36.43	0	1 min 1
HSP26_YEAST:198:x:HSP26_YEAST:45	RQLANTPAKDSTGK-DGKNHVK-a9-b3	HSP26_YEAST	HSP26_YEAST	intra-protein xl	45	198	0.36	31.83	0	1 min 2
HSP26_YEAST:198:x:HSP26_YEAST:50	DSTGKEVARPNNYAGALYDPR-DGKNHVK-a5-b3	HSP26_YEAST	HSP26_YEAST	intra-protein xl	50	198	0	34.13	0.033	1 min 1
HSP26_YEAST:198:x:HSP26_YEAST:50	DSTGKEVARPNNYAGALYDPR-DGKNHVK-a5-b3	HSP26_YEAST	HSP26_YEAST	intra-protein xl	50	198	0	33.92	0	30 min 1
HSP26_YEAST:198:x:HSP26_YEAST:50	DSTGKEVARPNNYAGALYDPR-DGKNHVK-a5-b3	HSP26_YEAST	HSP26_YEAST	intra-protein xl	50	198	0	32.78	0	5 min 1
HSP26_YEAST:198:x:HSP26_YEAST:50	DSTGKEVARPNNYAGALYDPR-DGKNHVK-a5-b3	HSP26_YEAST	HSP26_YEAST	intra-protein xl	50	198	0	32.5	0.038	5 min 2
HSP26_YEAST:45	RQLANTPAKDSTGK-K9-156	HSP26_YEAST	-	monolink	45	n/a	0	41.26	0	1 min 1
HSP26_YEAST:45	RQLANTPAKDSTGK-K9-156	HSP26_YEAST	-	monolink	45	n/a	0	41.07	0	1 min 2
HSP26_YEAST:45	RQLANTPAKDSTGK-K9-156	HSP26_YEAST	-	monolink	45	n/a	0	35.29	0	30 min 1
HSP26_YEAST:45	RQLANTPAKDSTGK-K9-156	HSP26_YEAST	-	monolink	45	n/a	0	37.78	0	30 min 2
HSP26_YEAST:45	RQLANTPAKDSTGK-K9-156	HSP26_YEAST	-	monolink	45	n/a	0	37.53	0	5 min 1
HSP26_YEAST:45	RQLANTPAKDSTGK-K9-156	HSP26_YEAST	-	monolink	45	n/a	0	37.1	0	5 min 2
HSP26_YEAST:45:x:HSP26_YEAST:45	RQLANTPAKDSTGK-RQLANTPAKDSTGK-a9-b9	HSP26_YEAST	HSP26_YEAST	intra-protein xl	45	45	0.24	38.25	0	1 min 1
HSP26_YEAST:45:x:HSP26_YEAST:45	RQLANTPAKDSTGK-RQLANTPAKDSTGK-a9-b9	HSP26_YEAST	HSP26_YEAST	intra-protein xl	45	45	0.18	38.15	0	1 min 2
HSP26_YEAST:45:x:HSP26_YEAST:45	RQLANTPAKDSTGK-RQLANTPAKDSTGK-a9-b9	HSP26_YEAST	HSP26_YEAST	intra-protein xl	45	45	0.18	37.86	0	30 min 1
HSP26_YEAST:45:x:HSP26_YEAST:45	RQLANTPAKDSTGK-RQLANTPAKDSTGK-a9-b9	HSP26_YEAST	HSP26_YEAST	intra-protein xl	45	45	0.25	39.2	0	30 min 2
HSP26_YEAST:45:x:HSP26_YEAST:45	RQLANTPAKDSTGK-RQLANTPAKDSTGK-a9-b9	HSP26_YEAST	HSP26_YEAST	intra-protein xl	45	45	0.33	36.38	0	5 min 1
HSP26_YEAST:45:x:HSP26_YEAST:45	RQLANTPAKDSTGK-RQLANTPAKDSTGK-a9-b9	HSP26_YEAST	HSP26_YEAST	intra-protein xl	45	45	0	35.29	0.038	5 min 2
HSP26_YEAST:45:x:HSP26_YEAST:50	QLANTPAKDSTGKEVARPNNYAGALYDPR-K8-K13	HSP26_YEAST	-	looplink	45	50	0	45.53	0	1 min 1
HSP26_YEAST:45:x:HSP26_YEAST:50	DSTGKEVARPNNYAGALYDPR-QLANTPAKDSTGK-a5-b8	HSP26_YEAST	HSP26_YEAST	intra-protein xl	50	45	0	42.45	0	1 min 1
HSP26_YEAST:45:x:HSP26_YEAST:50	QLANTPAKDSTGKEVARPNNYAGALYDPR-K8-K13	HSP26_YEAST	-	looplink	45	50	0	45.75	0	1 min 2
HSP26_YEAST:45:x:HSP26_YEAST:50	DSTGKEVARPNNYAGALYDPR-QLANTPAKDSTGK-a5-b8	HSP26_YEAST	HSP26_YEAST	intra-protein xl	50	45	0	36.03	0	1 min 2
HSP26_YEAST:45:x:HSP26_YEAST:50	DSTGKEVARPNNYAGALYDPR-QLANTPAKDSTGK-a5-b8	HSP26_YEAST	HSP26_YEAST	intra-protein xl	50	45	0	36.24	0	30 min 1
HSP26_YEAST:45:x:HSP26_YEAST:50	QLANTPAKDSTGKEVARPNNYAGALYDPR-K8-K13	HSP26_YEAST	-	looplink	45	50	0	43.48	0	30 min 2
HSP26_YEAST:45:x:HSP26_YEAST:50	DSTGKEVARPNNYAGALYDPR-RQLANTPAKDSTGK-a5-b9	HSP26_YEAST	HSP26_YEAST	intra-protein xl	50	45	0	33.44	0.03	30 min 2
HSP26_YEAST:45:x:HSP26_YEAST:50	QLANTPAKDSTGKEVARPNNYAGALYDPR-K8-K13	HSP26_YEAST	-	looplink	45	50	0	45.79	0	5 min 1
HSP26_YEAST:45:x:HSP26_YEAST:50	DSTGKEVARPNNYAGALYDPR-QLANTPAKDSTGK-a5-b8	HSP26_YEAST	HSP26_YEAST	intra-protein xl	50	45	0	41.27	0	5 min 1
HSP26_YEAST:45:x:HSP26_YEAST:50	QLANTPAKDSTGKEVARPNNYAGALYDPR-K8-K13	HSP26_YEAST	-	looplink	45	50	0	47.45	0	5 min 2
HSP26_YEAST:45:x:HSP26_YEAST:50	DSTGKEVARPNNYAGALYDPR-RQLANTPAKDSTGK-a5-b9	HSP26_YEAST	HSP26_YEAST	intra-protein xl	50	45	0	35.76	0.038	5 min 2
HSP26_YEAST:50	DSTGKEVARPNNYAGALYDPR-K5-155	HSP26_YEAST	-	monolink	50	n/a	0	40.29	0	1 min 1
HSP26_YEAST:50	DSTGKEVARPNNYAGALYDPR-K5-155	HSP26_YEAST	-	monolink	50	n/a	0	42.33	0	1 min 2
HSP26_YEAST:50	DSTGKEVARPNNYAGALYDPR-K5-155	HSP26_YEAST	-	monolink	50	n/a	0	40	0	30 min 1
HSP26_YEAST:50	DSTGKEVARPNNYAGALYDPR-K5-155	HSP26_YEAST	-	monolink	50	n/a	0	42.68	0	30 min 2
HSP26_YEAST:50	DSTGKEVARPNNYAGALYDPR-K5-155	HSP26_YEAST	-	monolink	50	n/a	0	41.57	0	5 min 1
HSP26_YEAST:50	DSTGKEVARPNNYAGALYDPR-K5-155	HSP26_YEAST	-	monolink	50	n/a	0	39.63	0	5 min 2
HSP26_YEAST:50:x:HSP26_YEAST:50	DSTGKEVARPNNYAGALYDPR-DSTGKEVARPNNYAGALYDPR-a5-b5	HSP26_YEAST	HSP26_YEAST	intra-protein xl	50	50	0	28.25	0.045	1 min 1
HSP26_YEAST:50:x:HSP26_YEAST:50	DSTGKEVARPNNYAGALYDPR-DSTGKEVARPNNYAGALYDPR-a5-b5	HSP26_YEAST	HSP26_YEAST	intra-protein xl	50	50	0	31.07	0.03	30 min 2
HSP26_YEAST:50:x:HSP26_YEAST:50	DSTGKEVARPNNYAGALYDPR-DSTGKEVARPNNYAGALYDPR-a5-b5	HSP26_YEAST	HSP26_YEAST	intra-protein xl	50	50	0	30.61	0	5 min 1
sp|P00346|MDHM_PIG:105:x:sp|P00346|MDHM_PIG:157	KHGVYNPNK-KPGMTR-a1-b1	sp|P00346|MDHM_PIG	sp|P00346|MDHM_PIG	intra-protein xl	157	105	0	26.53	0.045	1 min 1
sp|P00346|MDHM_PIG:105:x:sp|P00346|MDHM_PIG:157	KHGVYNPNK-KPGMTR-a1-b1	sp|P00346|MDHM_PIG	sp|P00346|MDHM_PIG	intra-protein xl	157	105	0.52	28.53	0.017	1 min 2
sp|P00346|MDHM_PIG:105:x:sp|P00346|MDHM_PIG:157	KHGVYNPNK-KPGMTR-a1-b1	sp|P00346|MDHM_PIG	sp|P00346|MDHM_PIG	intra-protein xl	157	105	0.57	29.43	0.029	30 min 1
sp|P00346|MDHM_PIG:105:x:sp|P00346|MDHM_PIG:157	KHGVYNPNK-KPGMTR-a1-b1	sp|P00346|MDHM_PIG	sp|P00346|MDHM_PIG	intra-protein xl	157	105	0	29.73	0.03	30 min 2
sp|P00346|MDHM_PIG:105:x:sp|P00346|MDHM_PIG:157	KHGVYNPNK-KPGMTR-a1-b1	sp|P00346|MDHM_PIG	sp|P00346|MDHM_PIG	intra-protein xl	157	105	0.49	32	0	5 min 1
sp|P00346|MDHM_PIG:105:x:sp|P00346|MDHM_PIG:157	KHGVYNPNK-KPGMTR-a1-b1	sp|P00346|MDHM_PIG	sp|P00346|MDHM_PIG	intra-protein xl	157	105	0	29.4	0.056	5 min 2
sp|P00346|MDHM_PIG:105:x:sp|P00346|MDHM_PIG:239	IQEAGTEVVKAK-KPGMTR-a10-b1	sp|P00346|MDHM_PIG	sp|P00346|MDHM_PIG	intra-protein xl	239	105	0	26.94	0.045	1 min 1
sp|P00346|MDHM_PIG:105:x:sp|P00346|MDHM_PIG:239	IQEAGTEVVKAK-KPGMTR-a10-b1	sp|P00346|MDHM_PIG	sp|P00346|MDHM_PIG	intra-protein xl	239	105	0	27.86	0.034	30 min 1
sp|P00346|MDHM_PIG:105:x:sp|P00346|MDHM_PIG:239	IQEAGTEVVKAK-KPGMTR-a10-b1	sp|P00346|MDHM_PIG	sp|P00346|MDHM_PIG	intra-protein xl	239	105	0	26.77	0.065	30 min 2
sp|P00346|MDHM_PIG:105:x:sp|P00346|MDHM_PIG:239	IQEAGTEVVKAK-KPGMTR-a10-b1	sp|P00346|MDHM_PIG	sp|P00346|MDHM_PIG	intra-protein xl	239	105	0	26.71	0.026	5 min 1
sp|P00346|MDHM_PIG:105:x:sp|P00346|MDHM_PIG:239	IQEAGTEVVKAK-KPGMTR-a10-b1	sp|P00346|MDHM_PIG	sp|P00346|MDHM_PIG	intra-protein xl	239	105	0	28.07	0.056	5 min 2
sp|P00346|MDHM_PIG:105:x:sp|P00346|MDHM_PIG:241	AKAGAGSATLSMAYAGAR-KPGMTR-a2-b1	sp|P00346|MDHM_PIG	sp|P00346|MDHM_PIG	intra-protein xl	241	105	0	39.3	0	30 min 1
sp|P00346|MDHM_PIG:105:x:sp|P00346|MDHM_PIG:241	AKAGAGSATLSMAYAGAR-KPGMTR-a2-b1	sp|P00346|MDHM_PIG	sp|P00346|MDHM_PIG	intra-protein xl	241	105	0	39.71	0	30 min 2
sp|P00346|MDHM_PIG:105:x:sp|P00346|MDHM_PIG:241	AKAGAGSATLSMAYAGAR-KPGMTR-a2-b1	sp|P00346|MDHM_PIG	sp|P00346|MDHM_PIG	intra-protein xl	241	105	0	38.43	0	5 min 2
sp|P00346|MDHM_PIG:105:x:sp|P00346|MDHM_PIG:329	KGEEFVK-KPGMTR-a1-b1	sp|P00346|MDHM_PIG	sp|P00346|MDHM_PIG	intra-protein xl	329	105	0.77	34.21	0	30 min 1
sp|P00346|MDHM_PIG:105:x:sp|P00346|MDHM_PIG:329	KGEEFVK-KPGMTR-a1-b1	sp|P00346|MDHM_PIG	sp|P00346|MDHM_PIG	intra-protein xl	329	105	0.76	33.23	0.03	30 min 2
sp|P00346|MDHM_PIG:105:x:sp|P00346|MDHM_PIG:329	KGEEFVK-KPGMTR-a1-b1	sp|P00346|MDHM_PIG	sp|P00346|MDHM_PIG	intra-protein xl	329	105	0.86	35.16	0	5 min 1
sp|P00346|MDHM_PIG:105:x:sp|P00346|MDHM_PIG:329	KGEEFVK-KPGMTR-a1-b1	sp|P00346|MDHM_PIG	sp|P00346|MDHM_PIG	intra-protein xl	329	105	0.76	30.54	0.038	5 min 2
sp|P00346|MDHM_PIG:157	KHGVYNPNK-K1-155	sp|P00346|MDHM_PIG	-	monolink	157	n/a	0.4	38.96	0	1 min 1
sp|P00346|MDHM_PIG:157	KHGVYNPNK-K1-155	sp|P00346|MDHM_PIG	-	monolink	157	n/a	0.47	30.12	0	1 min 2
sp|P00346|MDHM_PIG:157	KHGVYNPNK-K1-155	sp|P00346|MDHM_PIG	-	monolink	157	n/a	0.38	32.93	0	30 min 1
sp|P00346|MDHM_PIG:157	KHGVYNPNK-K1-155	sp|P00346|MDHM_PIG	-	monolink	157	n/a	0.47	36.43	0	30 min 2
sp|P00346|MDHM_PIG:157	KHGVYNPNK-K1-155	sp|P00346|MDHM_PIG	-	monolink	157	n/a	0.46	37.28	0	5 min 1
sp|P00346|MDHM_PIG:157	KHGVYNPNK-K1-155	sp|P00346|MDHM_PIG	-	monolink	157	n/a	0.31	33.57	0	5 min 2
sp|P00346|MDHM_PIG:157:x:sp|P00346|MDHM_PIG:335	KGEEFVKNMK-KHGVYNPNK-a7-b1	sp|P00346|MDHM_PIG	sp|P00346|MDHM_PIG	intra-protein xl	335	157	0.76	31.35	0.033	1 min 1
sp|P00346|MDHM_PIG:157:x:sp|P00346|MDHM_PIG:335	KGEEFVKNMK-KHGVYNPNK-a7-b1	sp|P00346|MDHM_PIG	sp|P00346|MDHM_PIG	intra-protein xl	335	157	0.87	42.02	0	1 min 2
sp|P00346|MDHM_PIG:157:x:sp|P00346|MDHM_PIG:335	KGEEFVKNMK-KHGVYNPNK-a7-b1	sp|P00346|MDHM_PIG	sp|P00346|MDHM_PIG	intra-protein xl	335	157	0.87	40.54	0	30 min 1
sp|P00346|MDHM_PIG:157:x:sp|P00346|MDHM_PIG:335	KGEEFVKNMK-KHGVYNPNK-a7-b1	sp|P00346|MDHM_PIG	sp|P00346|MDHM_PIG	intra-protein xl	335	157	0.77	40.98	0	30 min 2
sp|P00346|MDHM_PIG:157:x:sp|P00346|MDHM_PIG:335	KGEEFVKNMK-KHGVYNPNK-a7-b1	sp|P00346|MDHM_PIG	sp|P00346|MDHM_PIG	intra-protein xl	335	157	0.72	38.04	0	5 min 1
sp|P00346|MDHM_PIG:157:x:sp|P00346|MDHM_PIG:335	KGEEFVKNMK-KHGVYNPNK-a7-b1	sp|P00346|MDHM_PIG	sp|P00346|MDHM_PIG	intra-protein xl	335	157	0.88	37.06	0	5 min 2
sp|P00346|MDHM_PIG:165	HGVYNPNKIFGVTTLDIVR-K8-155	sp|P00346|MDHM_PIG	-	monolink	165	n/a	0	49.21	0	1 min 1
sp|P00346|MDHM_PIG:165	HGVYNPNKIFGVTTLDIVR-K8-156	sp|P00346|MDHM_PIG	-	monolink	165	n/a	0	47.66	0	1 min 2
sp|P00346|MDHM_PIG:165	HGVYNPNKIFGVTTLDIVR-K8-155	sp|P00346|MDHM_PIG	-	monolink	165	n/a	0.12	47.69	0	30 min 1
sp|P00346|MDHM_PIG:165	HGVYNPNKIFGVTTLDIVR-K8-155	sp|P00346|MDHM_PIG	-	monolink	165	n/a	0	50.35	0	30 min 2
sp|P00346|MDHM_PIG:165	HGVYNPNKIFGVTTLDIVR-K8-155	sp|P00346|MDHM_PIG	-	monolink	165	n/a	0.1	50.27	0	5 min 1
sp|P00346|MDHM_PIG:165	HGVYNPNKIFGVTTLDIVR-K8-155	sp|P00346|MDHM_PIG	-	monolink	165	n/a	0.12	48.73	0	5 min 2
sp|P00346|MDHM_PIG:165:x:sp|P00346|MDHM_PIG:296	HGVYNPNKIFGVTTLDIVR-SQETDCPYFSTPLLLGKK-a8-b17	sp|P00346|MDHM_PIG	sp|P00346|MDHM_PIG	intra-protein xl	165	296	0	26.3	0.017	1 min 2
sp|P00346|MDHM_PIG:165:x:sp|P00346|MDHM_PIG:296	HGVYNPNKIFGVTTLDIVR-SQETDCPYFSTPLLLGKK-a8-b17	sp|P00346|MDHM_PIG	sp|P00346|MDHM_PIG	intra-protein xl	165	296	0	28.97	0.029	30 min 1
sp|P00346|MDHM_PIG:165:x:sp|P00346|MDHM_PIG:296	HGVYNPNKIFGVTTLDIVR-SQETDCPYFSTPLLLGKK-a8-b17	sp|P00346|MDHM_PIG	sp|P00346|MDHM_PIG	intra-protein xl	165	296	0.69	41.25	0	30 min 2
sp|P00346|MDHM_PIG:165:x:sp|P00346|MDHM_PIG:296	HGVYNPNKIFGVTTLDIVR-SQETDCPYFSTPLLLGKK-a8-b17	sp|P00346|MDHM_PIG	sp|P00346|MDHM_PIG	intra-protein xl	165	296	0	36.09	0.038	5 min 2
sp|P00346|MDHM_PIG:185	ANAFVAELKGLDPAR-K9-155	sp|P00346|MDHM_PIG	-	monolink	185	n/a	0	41.15	0	1 min 1
sp|P00346|MDHM_PIG:185	ANAFVAELKGLDPAR-K9-155	sp|P00346|MDHM_PIG	-	monolink	185	n/a	0	39.55	0	1 min 2
sp|P00346|MDHM_PIG:185	ANAFVAELKGLDPAR-K9-155	sp|P00346|MDHM_PIG	-	monolink	185	n/a	0	43.1	0	30 min 1
sp|P00346|MDHM_PIG:185	ANAFVAELKGLDPAR-K9-156	sp|P00346|MDHM_PIG	-	monolink	185	n/a	0	42.61	0	30 min 2
sp|P00346|MDHM_PIG:185	ANAFVAELKGLDPAR-K9-155	sp|P00346|MDHM_PIG	-	monolink	185	n/a	0	43.48	0	5 min 1
sp|P00346|MDHM_PIG:185	ANAFVAELKGLDPAR-K9-156	sp|P00346|MDHM_PIG	-	monolink	185	n/a	0	43.94	0	5 min 2
sp|P00346|MDHM_PIG:203	VSVPVIGGHAGKTIIPLISQCTPK-K12-155	sp|P00346|MDHM_PIG	-	monolink	203	n/a	0	37.24	0	1 min 1
sp|P00346|MDHM_PIG:203	VSVPVIGGHAGKTIIPLISQCTPK-K12-155	sp|P00346|MDHM_PIG	-	monolink	203	n/a	0	45.64	0	1 min 2
sp|P00346|MDHM_PIG:203	VSVPVIGGHAGKTIIPLISQCTPK-K12-155	sp|P00346|MDHM_PIG	-	monolink	203	n/a	0	36.02	0	30 min 1
sp|P00346|MDHM_PIG:203	VSVPVIGGHAGKTIIPLISQCTPK-K12-155	sp|P00346|MDHM_PIG	-	monolink	203	n/a	0	43.65	0	30 min 2
sp|P00346|MDHM_PIG:203	VSVPVIGGHAGKTIIPLISQCTPK-K12-155	sp|P00346|MDHM_PIG	-	monolink	203	n/a	0	42.09	0	5 min 1
sp|P00346|MDHM_PIG:203	VSVPVIGGHAGKTIIPLISQCTPK-K12-155	sp|P00346|MDHM_PIG	-	monolink	203	n/a	0	38.12	0	5 min 2
sp|P00346|MDHM_PIG:203:x:sp|P00346|MDHM_PIG:314	VSVPVIGGHAGKTIIPLISQCTPK-ISPFEEKMIAEAIPELK-a12-b7	sp|P00346|MDHM_PIG	sp|P00346|MDHM_PIG	intra-protein xl	203	314	0.66	29.65	0.017	1 min 2
sp|P00346|MDHM_PIG:203:x:sp|P00346|MDHM_PIG:329	VSVPVIGGHAGKTIIPLISQCTPK-KGEEFVK-a12-b1	sp|P00346|MDHM_PIG	sp|P00346|MDHM_PIG	intra-protein xl	203	329	0	27.27	0.045	1 min 1
sp|P00346|MDHM_PIG:203:x:sp|P00346|MDHM_PIG:329	VSVPVIGGHAGKTIIPLISQCTPK-KGEEFVK-a12-b1	sp|P00346|MDHM_PIG	sp|P00346|MDHM_PIG	intra-protein xl	203	329	0	29.63	0.029	30 min 1
sp|P00346|MDHM_PIG:203:x:sp|P00346|MDHM_PIG:329	VSVPVIGGHAGKTIIPLISQCTPK-KGEEFVK-a12-b1	sp|P00346|MDHM_PIG	sp|P00346|MDHM_PIG	intra-protein xl	203	329	0	29.13	0.03	30 min 2
sp|P00346|MDHM_PIG:203:x:sp|P00346|MDHM_PIG:329	VSVPVIGGHAGKTIIPLISQCTPK-KGEEFVK-a12-b1	sp|P00346|MDHM_PIG	sp|P00346|MDHM_PIG	intra-protein xl	203	329	0	29.05	0.026	5 min 1
sp|P00346|MDHM_PIG:203:x:sp|P00346|MDHM_PIG:329	VSVPVIGGHAGKTIIPLISQCTPK-KGEEFVK-a12-b1	sp|P00346|MDHM_PIG	sp|P00346|MDHM_PIG	intra-protein xl	203	329	0	28.59	0.056	5 min 2
sp|P00346|MDHM_PIG:215	TIIPLISQCTPKVDFPQDQLSTLTGR-K12-155	sp|P00346|MDHM_PIG	-	monolink	215	n/a	0	48.83	0	1 min 1
sp|P00346|MDHM_PIG:215	TIIPLISQCTPKVDFPQDQLSTLTGR-K12-155	sp|P00346|MDHM_PIG	-	monolink	215	n/a	0	43.87	0	1 min 2
sp|P00346|MDHM_PIG:215	TIIPLISQCTPKVDFPQDQLSTLTGR-K12-155	sp|P00346|MDHM_PIG	-	monolink	215	n/a	0	42.57	0	30 min 1
sp|P00346|MDHM_PIG:215	TIIPLISQCTPKVDFPQDQLSTLTGR-K12-155	sp|P00346|MDHM_PIG	-	monolink	215	n/a	0	38.1	0	30 min 2
sp|P00346|MDHM_PIG:215	TIIPLISQCTPKVDFPQDQLSTLTGR-K12-155	sp|P00346|MDHM_PIG	-	monolink	215	n/a	0	45.47	0	5 min 1
sp|P00346|MDHM_PIG:215	TIIPLISQCTPKVDFPQDQLSTLTGR-K12-155	sp|P00346|MDHM_PIG	-	monolink	215	n/a	0	42.57	0	5 min 2
sp|P00346|MDHM_PIG:239	IQEAGTEVVKAK-K10-155	sp|P00346|MDHM_PIG	-	monolink	239	n/a	0	42.75	0	1 min 1
sp|P00346|MDHM_PIG:239	IQEAGTEVVKAK-K10-156	sp|P00346|MDHM_PIG	-	monolink	239	n/a	0	40.4	0	1 min 2
sp|P00346|MDHM_PIG:239	IQEAGTEVVKAK-K10-155	sp|P00346|MDHM_PIG	-	monolink	239	n/a	0	38.94	0	30 min 1
sp|P00346|MDHM_PIG:239	IQEAGTEVVKAK-K10-155	sp|P00346|MDHM_PIG	-	monolink	239	n/a	0	41	0	30 min 2
sp|P00346|MDHM_PIG:239	IQEAGTEVVKAK-K10-155	sp|P00346|MDHM_PIG	-	monolink	239	n/a	0	39.48	0	5 min 1
sp|P00346|MDHM_PIG:239	IQEAGTEVVKAK-K10-155	sp|P00346|MDHM_PIG	-	monolink	239	n/a	0	41.82	0	5 min 2
sp|P00346|MDHM_PIG:239:x:sp|P00346|MDHM_PIG:329	IQEAGTEVVKAK-KGEEFVK-a10-b1	sp|P00346|MDHM_PIG	sp|P00346|MDHM_PIG	intra-protein xl	239	329	0	26.06	0.034	30 min 1
sp|P00346|MDHM_PIG:239:x:sp|P00346|MDHM_PIG:78	ATVKGYLGPEQLPDCLK-IQEAGTEVVKAK-a4-b10	sp|P00346|MDHM_PIG	sp|P00346|MDHM_PIG	intra-protein xl	78	239	0	28.92	0.033	1 min 1
sp|P00346|MDHM_PIG:239:x:sp|P00346|MDHM_PIG:78	ATVKGYLGPEQLPDCLK-IQEAGTEVVKAK-a4-b10	sp|P00346|MDHM_PIG	sp|P00346|MDHM_PIG	intra-protein xl	78	239	0	27.65	0.017	1 min 2
sp|P00346|MDHM_PIG:239:x:sp|P00346|MDHM_PIG:78	ATVKGYLGPEQLPDCLK-IQEAGTEVVKAK-a4-b10	sp|P00346|MDHM_PIG	sp|P00346|MDHM_PIG	intra-protein xl	78	239	0	25.83	0.034	30 min 1
sp|P00346|MDHM_PIG:239:x:sp|P00346|MDHM_PIG:78	ATVKGYLGPEQLPDCLK-IQEAGTEVVKAK-a4-b10	sp|P00346|MDHM_PIG	sp|P00346|MDHM_PIG	intra-protein xl	78	239	0	30.26	0.03	30 min 2
sp|P00346|MDHM_PIG:279	EGVVECSFVKSQETDCPYFSTPLLLGK-K10-155	sp|P00346|MDHM_PIG	-	monolink	279	n/a	0.08	51.22	0	1 min 1
sp|P00346|MDHM_PIG:279	EGVVECSFVKSQETDCPYFSTPLLLGK-K10-155	sp|P00346|MDHM_PIG	-	monolink	279	n/a	0.07	46.51	0	1 min 2
sp|P00346|MDHM_PIG:279	EGVVECSFVKSQETDCPYFSTPLLLGK-K10-155	sp|P00346|MDHM_PIG	-	monolink	279	n/a	0	48.83	0	30 min 1
sp|P00346|MDHM_PIG:279	EGVVECSFVKSQETDCPYFSTPLLLGK-K10-155	sp|P00346|MDHM_PIG	-	monolink	279	n/a	0	42.04	0	30 min 2
sp|P00346|MDHM_PIG:279	EGVVECSFVKSQETDCPYFSTPLLLGK-K10-155	sp|P00346|MDHM_PIG	-	monolink	279	n/a	0.04	49.63	0	5 min 1
sp|P00346|MDHM_PIG:279	EGVVECSFVKSQETDCPYFSTPLLLGK-K10-155	sp|P00346|MDHM_PIG	-	monolink	279	n/a	0.06	47.47	0	5 min 2
sp|P00346|MDHM_PIG:296	SQETDCPYFSTPLLLGKK-K17-155	sp|P00346|MDHM_PIG	-	monolink	296	n/a	0	37.77	0	1 min 1
sp|P00346|MDHM_PIG:296	SQETDCPYFSTPLLLGKK-K17-155	sp|P00346|MDHM_PIG	-	monolink	296	n/a	0.04	41.44	0	1 min 2
sp|P00346|MDHM_PIG:296	SQETDCPYFSTPLLLGKK-K17-155	sp|P00346|MDHM_PIG	-	monolink	296	n/a	0	40.46	0	30 min 1
sp|P00346|MDHM_PIG:296	SQETDCPYFSTPLLLGKK-K17-155	sp|P00346|MDHM_PIG	-	monolink	296	n/a	0.03	44.59	0	30 min 2
sp|P00346|MDHM_PIG:296	SQETDCPYFSTPLLLGKK-K17-156	sp|P00346|MDHM_PIG	-	monolink	296	n/a	0.08	44.71	0	5 min 1
sp|P00346|MDHM_PIG:296	SQETDCPYFSTPLLLGKK-K17-155	sp|P00346|MDHM_PIG	-	monolink	296	n/a	0.04	43.68	0	5 min 2
sp|P00346|MDHM_PIG:296:x:sp|P00346|MDHM_PIG:297	SQETDCPYFSTPLLLGKKGIEK-K17-K18	sp|P00346|MDHM_PIG	-	looplink	296	297	0.18	44.32	0	1 min 1
sp|P00346|MDHM_PIG:296:x:sp|P00346|MDHM_PIG:297	SQETDCPYFSTPLLLGKKGIEK-K17-K18	sp|P00346|MDHM_PIG	-	looplink	296	297	0.19	42.8	0	1 min 2
sp|P00346|MDHM_PIG:296:x:sp|P00346|MDHM_PIG:297	SQETDCPYFSTPLLLGKKGIEK-K17-K18	sp|P00346|MDHM_PIG	-	looplink	296	297	0	41.63	0	30 min 1
sp|P00346|MDHM_PIG:296:x:sp|P00346|MDHM_PIG:297	SQETDCPYFSTPLLLGKKGIEK-K17-K18	sp|P00346|MDHM_PIG	-	looplink	296	297	0	42.47	0	30 min 2
sp|P00346|MDHM_PIG:296:x:sp|P00346|MDHM_PIG:297	SQETDCPYFSTPLLLGKKGIEK-K17-K18	sp|P00346|MDHM_PIG	-	looplink	296	297	0.2	42.7	0	5 min 1
sp|P00346|MDHM_PIG:296:x:sp|P00346|MDHM_PIG:297	SQETDCPYFSTPLLLGKKGIEK-K17-K18	sp|P00346|MDHM_PIG	-	looplink	296	297	0	35.95	0	5 min 2
sp|P00346|MDHM_PIG:296:x:sp|P00346|MDHM_PIG:301	SQETDCPYFSTPLLLGKK-GIEKNLGIGK-a17-b4	sp|P00346|MDHM_PIG	sp|P00346|MDHM_PIG	intra-protein xl	296	301	0.83	34.87	0.033	1 min 1
sp|P00346|MDHM_PIG:296:x:sp|P00346|MDHM_PIG:301	SQETDCPYFSTPLLLGKK-GIEKNLGIGK-a17-b4	sp|P00346|MDHM_PIG	sp|P00346|MDHM_PIG	intra-protein xl	296	301	0.89	39.11	0	1 min 2
sp|P00346|MDHM_PIG:296:x:sp|P00346|MDHM_PIG:301	SQETDCPYFSTPLLLGKK-GIEKNLGIGK-a17-b4	sp|P00346|MDHM_PIG	sp|P00346|MDHM_PIG	intra-protein xl	296	301	0.9	34.3	0	30 min 1
sp|P00346|MDHM_PIG:296:x:sp|P00346|MDHM_PIG:301	SQETDCPYFSTPLLLGKK-GIEKNLGIGK-a17-b4	sp|P00346|MDHM_PIG	sp|P00346|MDHM_PIG	intra-protein xl	296	301	0.87	35.45	0	30 min 2
sp|P00346|MDHM_PIG:296:x:sp|P00346|MDHM_PIG:301	SQETDCPYFSTPLLLGKK-GIEKNLGIGK-a17-b4	sp|P00346|MDHM_PIG	sp|P00346|MDHM_PIG	intra-protein xl	296	301	0.87	36.43	0	5 min 1
sp|P00346|MDHM_PIG:296:x:sp|P00346|MDHM_PIG:301	SQETDCPYFSTPLLLGKK-GIEKNLGIGK-a17-b4	sp|P00346|MDHM_PIG	sp|P00346|MDHM_PIG	intra-protein xl	296	301	0.86	35.79	0.038	5 min 2
sp|P00346|MDHM_PIG:297	SQETDCPYFSTPLLLGKK-K18-156	sp|P00346|MDHM_PIG	-	monolink	297	n/a	0	33.59	0	1 min 1
sp|P00346|MDHM_PIG:297	SQETDCPYFSTPLLLGKK-K18-155	sp|P00346|MDHM_PIG	-	monolink	297	n/a	0.09	35.92	0	1 min 2
sp|P00346|MDHM_PIG:297	KGIEKNLGIGK-K1-155	sp|P00346|MDHM_PIG	-	monolink	297	n/a	0.29	37.91	0	30 min 1
sp|P00346|MDHM_PIG:297	SQETDCPYFSTPLLLGKK-K18-155	sp|P00346|MDHM_PIG	-	monolink	297	n/a	0	39.02	0	5 min 1
sp|P00346|MDHM_PIG:301	KGIEKNLGIGK-K5-155	sp|P00346|MDHM_PIG	-	monolink	301	n/a	0.26	44.75	0	1 min 1
sp|P00346|MDHM_PIG:301	KGIEKNLGIGK-K5-155	sp|P00346|MDHM_PIG	-	monolink	301	n/a	0.27	43.91	0	1 min 2
sp|P00346|MDHM_PIG:301	KGIEKNLGIGK-K5-155	sp|P00346|MDHM_PIG	-	monolink	301	n/a	0.1	45.36	0	30 min 1
sp|P00346|MDHM_PIG:301	KGIEKNLGIGK-K5-155	sp|P00346|MDHM_PIG	-	monolink	301	n/a	0.24	43.93	0	30 min 2
sp|P00346|MDHM_PIG:301	KGIEKNLGIGK-K5-156	sp|P00346|MDHM_PIG	-	monolink	301	n/a	0.16	42.88	0	5 min 1
sp|P00346|MDHM_PIG:301	KGIEKNLGIGK-K5-155	sp|P00346|MDHM_PIG	-	monolink	301	n/a	0	42.74	0	5 min 2
sp|P00346|MDHM_PIG:301:x:sp|P00346|MDHM_PIG:307	GIEKNLGIGKISPFEEK-K4-K10	sp|P00346|MDHM_PIG	-	looplink	301	307	0.27	26.52	0	1 min 2
sp|P00346|MDHM_PIG:301:x:sp|P00346|MDHM_PIG:307	GIEKNLGIGKISPFEEK-K4-K10	sp|P00346|MDHM_PIG	-	looplink	301	307	0.09	32.02	0	30 min 1
sp|P00346|MDHM_PIG:301:x:sp|P00346|MDHM_PIG:307	GIEKNLGIGKISPFEEK-K4-K10	sp|P00346|MDHM_PIG	-	looplink	301	307	0.17	30.79	0	30 min 2
sp|P00346|MDHM_PIG:301:x:sp|P00346|MDHM_PIG:307	GIEKNLGIGKISPFEEK-K4-K10	sp|P00346|MDHM_PIG	-	looplink	301	307	0.18	32.79	0	5 min 1
sp|P00346|MDHM_PIG:301:x:sp|P00346|MDHM_PIG:307	GIEKNLGIGKISPFEEK-K4-K10	sp|P00346|MDHM_PIG	-	looplink	301	307	0.14	34.42	0	5 min 2
sp|P00346|MDHM_PIG:307	NLGIGKISPFEEK-K6-155	sp|P00346|MDHM_PIG	-	monolink	307	n/a	0.12	48.21	0	1 min 1
sp|P00346|MDHM_PIG:307	NLGIGKISPFEEK-K6-155	sp|P00346|MDHM_PIG	-	monolink	307	n/a	0	46.54	0	1 min 2
sp|P00346|MDHM_PIG:307	NLGIGKISPFEEK-K6-155	sp|P00346|MDHM_PIG	-	monolink	307	n/a	0.14	42.93	0	30 min 1
sp|P00346|MDHM_PIG:307	NLGIGKISPFEEK-K6-155	sp|P00346|MDHM_PIG	-	monolink	307	n/a	0.24	40.23	0	30 min 2
sp|P00346|MDHM_PIG:307	NLGIGKISPFEEK-K6-155	sp|P00346|MDHM_PIG	-	monolink	307	n/a	0.2	40.1	0	5 min 1
sp|P00346|MDHM_PIG:307	NLGIGKISPFEEK-K6-155	sp|P00346|MDHM_PIG	-	monolink	307	n/a	0	38.97	0	5 min 2
sp|P00346|MDHM_PIG:314	ISPFEEKMIAEAIPELK-K7-156	sp|P00346|MDHM_PIG	-	monolink	314	n/a	0	47.14	0	1 min 1
sp|P00346|MDHM_PIG:314	ISPFEEKMIAEAIPELK-K7-155	sp|P00346|MDHM_PIG	-	monolink	314	n/a	0.37	45.46	0	1 min 2
sp|P00346|MDHM_PIG:314	ISPFEEKMIAEAIPELK-K7-155	sp|P00346|MDHM_PIG	-	monolink	314	n/a	0.41	46.36	0	30 min 1
sp|P00346|MDHM_PIG:314	ISPFEEKMIAEAIPELK-K7-156	sp|P00346|MDHM_PIG	-	monolink	314	n/a	0.09	44.52	0	30 min 2
sp|P00346|MDHM_PIG:314	ISPFEEKMIAEAIPELK-K7-156	sp|P00346|MDHM_PIG	-	monolink	314	n/a	0	45.59	0	5 min 1
sp|P00346|MDHM_PIG:314	ISPFEEKMIAEAIPELK-K7-155	sp|P00346|MDHM_PIG	-	monolink	314	n/a	0.35	44.39	0	5 min 2
sp|P00346|MDHM_PIG:324	MIAEAIPELKASIK-K10-155	sp|P00346|MDHM_PIG	-	monolink	324	n/a	0.14	41.72	0	1 min 1
sp|P00346|MDHM_PIG:324	MIAEAIPELKASIK-K10-155	sp|P00346|MDHM_PIG	-	monolink	324	n/a	0.06	40.2	0	1 min 2
sp|P00346|MDHM_PIG:324	MIAEAIPELKASIK-K10-155	sp|P00346|MDHM_PIG	-	monolink	324	n/a	0.23	43.13	0	30 min 1
sp|P00346|MDHM_PIG:324	MIAEAIPELKASIK-K10-155	sp|P00346|MDHM_PIG	-	monolink	324	n/a	0.22	43.01	0	30 min 2
sp|P00346|MDHM_PIG:324	MIAEAIPELKASIK-K10-155	sp|P00346|MDHM_PIG	-	monolink	324	n/a	0.18	42.5	0	5 min 1
sp|P00346|MDHM_PIG:324	MIAEAIPELKASIK-K10-155	sp|P00346|MDHM_PIG	-	monolink	324	n/a	0.13	41.68	0	5 min 2
sp|P00346|MDHM_PIG:324:x:sp|P00346|MDHM_PIG:328	MIAEAIPELKASIKK-K10-K14	sp|P00346|MDHM_PIG	-	looplink	324	328	0.3	41.59	0	1 min 1
sp|P00346|MDHM_PIG:324:x:sp|P00346|MDHM_PIG:328	MIAEAIPELKASIKK-K10-K14	sp|P00346|MDHM_PIG	-	looplink	324	328	0.31	40.12	0	1 min 2
sp|P00346|MDHM_PIG:324:x:sp|P00346|MDHM_PIG:328	MIAEAIPELKASIKK-K10-K14	sp|P00346|MDHM_PIG	-	looplink	324	328	0.37	33.77	0	30 min 1
sp|P00346|MDHM_PIG:324:x:sp|P00346|MDHM_PIG:328	MIAEAIPELKASIKK-K10-K14	sp|P00346|MDHM_PIG	-	looplink	324	328	0.3	41.41	0	30 min 2
sp|P00346|MDHM_PIG:324:x:sp|P00346|MDHM_PIG:328	MIAEAIPELKASIKK-K10-K14	sp|P00346|MDHM_PIG	-	looplink	324	328	0.34	36.01	0	5 min 1
sp|P00346|MDHM_PIG:324:x:sp|P00346|MDHM_PIG:328	MIAEAIPELKASIKK-K10-K14	sp|P00346|MDHM_PIG	-	looplink	324	328	0.32	38.84	0	5 min 2
sp|P00346|MDHM_PIG:324:x:sp|P00346|MDHM_PIG:329	MIAEAIPELKASIKK-K10-K15	sp|P00346|MDHM_PIG	-	looplink	324	329	0.34	36.01	0	30 min 2
sp|P00346|MDHM_PIG:335	KGEEFVKNMK-K7-155	sp|P00346|MDHM_PIG	-	monolink	335	n/a	0.4	41.32	0	1 min 1
sp|P00346|MDHM_PIG:335	KGEEFVKNMK-K7-155	sp|P00346|MDHM_PIG	-	monolink	335	n/a	0.41	41.29	0	1 min 2
sp|P00346|MDHM_PIG:335	KGEEFVKNMK-K7-155	sp|P00346|MDHM_PIG	-	monolink	335	n/a	0.35	44.83	0	30 min 1
sp|P00346|MDHM_PIG:335	KGEEFVKNMK-K7-155	sp|P00346|MDHM_PIG	-	monolink	335	n/a	0.57	44.91	0	30 min 2
sp|P00346|MDHM_PIG:335	KGEEFVKNMK-K7-155	sp|P00346|MDHM_PIG	-	monolink	335	n/a	0.42	39.69	0	5 min 1
sp|P00346|MDHM_PIG:335	KGEEFVKNMK-K7-155	sp|P00346|MDHM_PIG	-	monolink	335	n/a	0.51	40.71	0	5 min 2
sp|P00346|MDHM_PIG:45	VAVLGASGGIGQPLSLLLKNSPLVSR-K19-155	sp|P00346|MDHM_PIG	-	monolink	45	n/a	0	37.22	0	1 min 1
sp|P00346|MDHM_PIG:45	VAVLGASGGIGQPLSLLLKNSPLVSR-K19-155	sp|P00346|MDHM_PIG	-	monolink	45	n/a	0	32.74	0	1 min 2
sp|P00346|MDHM_PIG:45	VAVLGASGGIGQPLSLLLKNSPLVSR-K19-155	sp|P00346|MDHM_PIG	-	monolink	45	n/a	0	38.38	0	30 min 1
sp|P00346|MDHM_PIG:45	VAVLGASGGIGQPLSLLLKNSPLVSR-K19-156	sp|P00346|MDHM_PIG	-	monolink	45	n/a	0	41.47	0	30 min 2
sp|P00346|MDHM_PIG:45	VAVLGASGGIGQPLSLLLKNSPLVSR-K19-155	sp|P00346|MDHM_PIG	-	monolink	45	n/a	0	33.35	0	5 min 1
sp|P00346|MDHM_PIG:45	VAVLGASGGIGQPLSLLLKNSPLVSR-K19-156	sp|P00346|MDHM_PIG	-	monolink	45	n/a	0	35.57	0	5 min 2
sp|P00346|MDHM_PIG:78	ATVKGYLGPEQLPDCLK-K4-155	sp|P00346|MDHM_PIG	-	monolink	78	n/a	0	41.56	0	1 min 1
sp|P00346|MDHM_PIG:78	ATVKGYLGPEQLPDCLK-K4-155	sp|P00346|MDHM_PIG	-	monolink	78	n/a	0	39.32	0	1 min 2
sp|P00346|MDHM_PIG:78	ATVKGYLGPEQLPDCLK-K4-155	sp|P00346|MDHM_PIG	-	monolink	78	n/a	0	40.08	0	30 min 1
sp|P00346|MDHM_PIG:78	ATVKGYLGPEQLPDCLK-K4-155	sp|P00346|MDHM_PIG	-	monolink	78	n/a	0	39.72	0	30 min 2
sp|P00346|MDHM_PIG:78	ATVKGYLGPEQLPDCLK-K4-155	sp|P00346|MDHM_PIG	-	monolink	78	n/a	0	39.09	0	5 min 1
sp|P00346|MDHM_PIG:78	ATVKGYLGPEQLPDCLK-K4-155	sp|P00346|MDHM_PIG	-	monolink	78	n/a	0	39.66	0	5 min 2
sp|P00346|MDHM_PIG:78:x:sp|P00346|MDHM_PIG:91	ATVKGYLGPEQLPDCLKGCDVVVIPAGVPR-K4-K17	sp|P00346|MDHM_PIG	-	looplink	78	91	0	35.15	0	1 min 1
sp|P00346|MDHM_PIG:78:x:sp|P00346|MDHM_PIG:91	ATVKGYLGPEQLPDCLKGCDVVVIPAGVPR-K4-K17	sp|P00346|MDHM_PIG	-	looplink	78	91	0	35.94	0	1 min 2
sp|P00346|MDHM_PIG:78:x:sp|P00346|MDHM_PIG:91	ATVKGYLGPEQLPDCLKGCDVVVIPAGVPR-K4-K17	sp|P00346|MDHM_PIG	-	looplink	78	91	0	33.24	0	30 min 1
sp|P00346|MDHM_PIG:78:x:sp|P00346|MDHM_PIG:91	ATVKGYLGPEQLPDCLKGCDVVVIPAGVPR-K4-K17	sp|P00346|MDHM_PIG	-	looplink	78	91	0	33	0	30 min 2
sp|P00346|MDHM_PIG:78:x:sp|P00346|MDHM_PIG:91	ATVKGYLGPEQLPDCLKGCDVVVIPAGVPR-K4-K17	sp|P00346|MDHM_PIG	-	looplink	78	91	0	33.03	0	5 min 1
sp|P00346|MDHM_PIG:78:x:sp|P00346|MDHM_PIG:91	ATVKGYLGPEQLPDCLKGCDVVVIPAGVPR-K4-K17	sp|P00346|MDHM_PIG	-	looplink	78	91	0	39.08	0	5 min 2
sp|P00346|MDHM_PIG:91	GYLGPEQLPDCLKGCDVVVIPAGVPR-K13-155	sp|P00346|MDHM_PIG	-	monolink	91	n/a	0	42.48	0	1 min 1
sp|P00346|MDHM_PIG:91	GYLGPEQLPDCLKGCDVVVIPAGVPR-K13-155	sp|P00346|MDHM_PIG	-	monolink	91	n/a	0	41.6	0	1 min 2
sp|P00346|MDHM_PIG:91	GYLGPEQLPDCLKGCDVVVIPAGVPR-K13-155	sp|P00346|MDHM_PIG	-	monolink	91	n/a	0	37.66	0	30 min 1
sp|P00346|MDHM_PIG:91	GYLGPEQLPDCLKGCDVVVIPAGVPR-K13-155	sp|P00346|MDHM_PIG	-	monolink	91	n/a	0	42.42	0	30 min 2
sp|P00346|MDHM_PIG:91	GYLGPEQLPDCLKGCDVVVIPAGVPR-K13-155	sp|P00346|MDHM_PIG	-	monolink	91	n/a	0	43.67	0	5 min 1
sp|P00346|MDHM_PIG:91	GYLGPEQLPDCLKGCDVVVIPAGVPR-K13-155	sp|P00346|MDHM_PIG	-	monolink	91	n/a	0	40.67	0	5 min 2

## Sheet: Table S4
Supplemental Table 6. FUS Aging Experiment unique uxIDs. Related to Figure 1C
	Intra-link		Mono-link		Loop-link

## Sheet: Table S5
Supplemental Table 3. FUSB8 Aging Experiment Crosslink Identification. Related to Figure S3H
Crosslinks were only considered, if they were identified in two out of three replicates with a deltaS < 0.95, a minimum Id score ≥ 20 and an ld score ≥ 25 in at least one replicate (filtering was done on the level of the unique Crosslinking site) and an FDR < 0.05 as calculated by xProphet for at least one replicate.
Only the highest scoring crosslink from three replicates is shown.
uxID	Id	Protein1	Protein2	XLType	AbsPos1	AbsPos2	deltaS	ld-Score	FDR	time point	No of Ids in triplicates
FUS:337:x:HspB8:120	TKDGYVEVSGK-ETGKLK-a2-b4	HspB8	FUS	inter-protein xl	120	337	0	26.39	0	3 hours	2
FUS:339:x:HspB8:	ZGPLGSMADGQMPFSCHYPSR-LKGEATVSFDDPPSAK-a1-b2	HspB8	FUS	inter-protein xl	1	339	0.51	26.41	0	3 hours	2
FUS:339:x:HspB8:129	DGYVEVSGKHEEKQQEGGIVSK-LKGEATVSFDDPPSAK-a9-b2	HspB8	FUS	inter-protein xl	129	339	0.35	26.76	0	3 hours	2
FUS:339:x:HspB8:133	LKGEATVSFDDPPSAK-HEEKQQEGGIVSK-a2-b4	FUS	HspB8	inter-protein xl	339	133	0.92	30.49	0	3 hours	3
FUS:515:x:HspB8:120	TKDGYVEVSGKHEEK-GGFGPGKMDSR-a2-b7	HspB8	FUS	inter-protein xl	120	515	0	26.21	0	3 hours	2
FUS:515:x:HspB8:129	DGYVEVSGKHEEK-GGFGPGKMDSR-a9-b7	HspB8	FUS	inter-protein xl	129	515	0.47	28.29	0	3 hours	3
FUS:320:x:FUS:321	TNKKTGQPMINLYTDR-K3-K4	FUS	-	looplink	320	321	0	35.22	0	3 hours	3
FUS:337:x:FUS:339	ETGKLKGEATVSFDDPPSAK-K4-K6	FUS	-	looplink	337	339	0	37.53	0	3 hours	3
FUS:362:x:FUS:370	AAIDWFDGKEFSGNPIKVSFATR-K9-K17	FUS	-	looplink	362	370	0	37.58	0	3 hours	3
FUS:453:x:FUS:456	NECNQCKAPKPDGPGGGPGGSHMGGNYGDDR-K7-K10	FUS	-	looplink	453	456	0.03	27.36	0	3 hours	3
HspB8:102:x:HspB8:111	TPPPFPGEPWKVCVNVHSFKPEELMVK-K11-K20	HspB8	-	looplink	102	111	0	25.79	0	3 hours	3
HspB8:111:x:HspB8:118	VCVNVHSFKPEELMVKTK-K9-K16	HspB8	-	looplink	111	118	0.47	26.51	0	3 hours	3
HspB8:118:x:HspB8:120	VCVNVHSFKPEELMVKTKDGYVEVSGK-K16-K18	HspB8	-	looplink	118	120	0	47.6	0	3 hours	3
HspB8:129:x:HspB8:133	DGYVEVSGKHEEKQQEGGIVSK-K9-K13	HspB8	-	looplink	129	133	0	42.56	0	3 hours	3
HspB8:133:x:HspB8:142	HEEKQQEGGIVSKNFTK-K4-K13	HspB8	-	looplink	133	142	0.42	34.43	0	3 hours	3
HspB8:142:x:HspB8:146	QQEGGIVSKNFTKK-K9-K13	HspB8	-	looplink	142	146	0.48	31.33	0	3 hours	3
FUS:269:x:FUS:339	LKGEATVSFDDPPSAK-GGFNKFGGPR-a2-b5	FUS	FUS	intra-protein xl	339	269	0.35	33.77	0	3 hours	3
FUS:317:x:FUS:321	KTGQPMINLYTDR-QIGIIKTNK-a1-b6	FUS	FUS	intra-protein xl	321	317	0	31.88	0	3 hours	3
FUS:337:x:FUS:370	EFSGNPIKVSFATR-ETGKLK-a8-b4	FUS	FUS	intra-protein xl	370	337	0.22	27.89	0.034	3 hours	3
FUS:339:x:FUS:370	LKGEATVSFDDPPSAK-EFSGNPIKVSFATR-a2-b8	FUS	FUS	intra-protein xl	339	370	0.46	35.93	0	3 hours	3
FUS:339:x:FUS:515	LKGEATVSFDDPPSAK-GGFGPGKMDSR-a2-b7	FUS	FUS	intra-protein xl	339	515	0	31.05	0	3 hours	3
HspB8::x:HspB8:	ZGPLGSMADGQMPFSCHYPSR-ZGPLGSMADGQMPFSCHYPSR-a1-b1	HspB8	HspB8	intra-protein xl	1	1	0	42.13	0	3 hours	3
HspB8::x:HspB8:118	ZGPLGSMADGQMPFSCHYPSR-VCVNVHSFKPEELMVKTK-a1-b16	HspB8	HspB8	intra-protein xl	1	118	0	29.13	0.034	3 hours	2
HspB8::x:HspB8:129	ZGPLGSMADGQMPFSCHYPSR-TKDGYVEVSGKHEEK-a1-b11	HspB8	HspB8	intra-protein xl	1	129	0.79	29.14	0.045	3 hours	3
HspB8:111:x:HspB8:120	VCVNVHSFKPEELMVK-TKDGYVEVSGK-a9-b2	HspB8	HspB8	intra-protein xl	111	120	0.68	35.5	0	3 hours	3
HspB8:111:x:HspB8:129	VCVNVHSFKPEELMVK-TKDGYVEVSGKHEEK-a9-b11	HspB8	HspB8	intra-protein xl	111	129	0.68	35.93	0	3 hours	3
HspB8:118:x:HspB8:129	VCVNVHSFKPEELMVKTK-DGYVEVSGKHEEK-a16-b9	HspB8	HspB8	intra-protein xl	118	129	0.58	37.94	0	3 hours	3
HspB8:120:x:HspB8:120	TKDGYVEVSGK-TKDGYVEVSGK-a2-b2	HspB8	HspB8	intra-protein xl	120	120	0	41.42	0	3 hours	3
HspB8:120:x:HspB8:129	DGYVEVSGKHEEK-TKDGYVEVSGK-a9-b2	HspB8	HspB8	intra-protein xl	129	120	0.73	46.3	0	3 hours	3
HspB8:120:x:HspB8:133	HEEKQQEGGIVSK-TKDGYVEVSGK-a4-b2	HspB8	HspB8	intra-protein xl	133	120	0.83	40.97	0	3 hours	3
HspB8:129:x:HspB8:129	TKDGYVEVSGKHEEK-DGYVEVSGKHEEK-a11-b9	HspB8	HspB8	intra-protein xl	129	129	0	45.34	0	3 hours	3
HspB8:129:x:HspB8:142	DGYVEVSGKHEEK-QQEGGIVSKNFTK-a9-b9	HspB8	HspB8	intra-protein xl	129	142	0.83	29.75	0	3 hours	3
FUS:317	QIGIIKTNKK-K6-155	FUS	-	monolink	317		0	25.81	0	3 hours	2
FUS:321	KTGQPMINLYTDRETGK-K1-155	FUS	-	monolink	321		0	33.23	0	3 hours	3
FUS:337	ETGKLKGEATVSFDDPPSAK-K4-155	FUS	-	monolink	337		0	39.37	0	3 hours	3
FUS:339	LKGEATVSFDDPPSAK-K2-156	FUS	-	monolink	339		0.13	39.24	0	3 hours	3
FUS:353	LKGEATVSFDDPPSAKAAIDWFDGK-K16-155	FUS	-	monolink	353		0	34.8	0	3 hours	3
FUS:362	AAIDWFDGKEFSGNPIK-K9-155	FUS	-	monolink	362		0	48.33	0	3 hours	3
FUS:370	AAIDWFDGKEFSGNPIKVSFATR-K17-155	FUS	-	monolink	370		0	50.57	0	3 hours	3
FUS:432	AGDWKCPNPTCENMNFSWR-K5-155	FUS	-	monolink	432		0	31.37	0	3 hours	2
FUS:453	NECNQCKAPKPDGPGGGPGGSHMGGNYGDDR-K7-155	FUS	-	monolink	453		0	37.58	0	3 hours	3
FUS:456	APKPDGPGGGPGGSHMGGNYGDDR-K3-155	FUS	-	monolink	456		0	34.01	0	3 hours	3
HspB8:	ZGPLGSMADGQMPFSCHYPSR-Z1-156	HspB8	-	monolink			0	31.45	0	3 hours	3
HspB8:102	TPPPFPGEPWKVCVNVHSFKPEELMVK-K11-155	HspB8	-	monolink	102		0	27.9	0	3 hours	3
HspB8:111	VCVNVHSFKPEELMVK-K9-156	HspB8	-	monolink	111		0.21	43.99	0	3 hours	3
HspB8:118	VCVNVHSFKPEELMVKTK-K16-155	HspB8	-	monolink	118		0.16	44.96	0	3 hours	3
HspB8:120	VCVNVHSFKPEELMVKTK-K18-156	HspB8	-	monolink	120		0.15	39.91	0	3 hours	3
HspB8:129	DGYVEVSGKHEEKQQEGGIVSK-K9-155	HspB8	-	monolink	129		0.16	44.07	0	3 hours	3
HspB8:133	HEEKQQEGGIVSK-K4-155	HspB8	-	monolink	133		0.23	50.28	0	3 hours	3
HspB8:142	HEEKQQEGGIVSKNFTK-K13-155	HspB8	-	monolink	142		0.14	46.49	0	3 hours	3

## Sheet: Table S6
Supplemental Table 4. FUSB8 Aging Experiment Crosslink Quantification. Related to Figure S3I
Quantifiaction for all RRM unique crosslinking sites shown in Table S3
uID	experiment	link_type	ms1_area_sum	imputed	ms1_area_sum_ref	imputed_ref	log2ratio	referenceexperiment	pvalue	FDR
FUS-mutant:317	3h matured FUSHspB8 condensates	monolink	24.0798	0	24.0511	0	0.028681	Fresh FUSHspB8 condensates	0.849814	0.895339
FUS-mutant:317:x:FUS-mutant:321	3h matured FUSHspB8 condensates	xlink	30.252	0	30.6676	0	-0.415628	Fresh FUSHspB8 condensates	0.000176226	0.00143686
FUS-mutant:320:x:FUS-mutant:321	3h matured FUSHspB8 condensates	looplink	23.828	0	23.9708	0	-0.142803	Fresh FUSHspB8 condensates	0.919335	0.921218
FUS-mutant:321	3h matured FUSHspB8 condensates	monolink	27.5212	0	27.7222	0	-0.200944	Fresh FUSHspB8 condensates	0.221198	0.343439
FUS-mutant:337	3h matured FUSHspB8 condensates	monolink	28.7967	0	28.9155	0	-0.118789	Fresh FUSHspB8 condensates	0.346148	0.486255
FUS-mutant:337:x:FUS-mutant:339	3h matured FUSHspB8 condensates	looplink	27.3258	0	27.173	0	0.152808	Fresh FUSHspB8 condensates	0.921218	0.921218
FUS-mutant:337:x:FUS-mutant:370	3h matured FUSHspB8 condensates	xlink	23.5429	0	24.1297	0	-0.586753	Fresh FUSHspB8 condensates	0.0278959	0.0658343
FUS-mutant:339	3h matured FUSHspB8 condensates	monolink	28.4339	0	28.587	0	-0.153119	Fresh FUSHspB8 condensates	0.816714	0.876111
FUS-mutant:339:x:FUS-mutant:370	3h matured FUSHspB8 condensates	xlink	26.3073	0	26.6897	0	-0.382375	Fresh FUSHspB8 condensates	0.00338161	0.0142511
FUS-mutant:353	3h matured FUSHspB8 condensates	monolink	27.2862	0	27.3344	0	-0.0481738	Fresh FUSHspB8 condensates	0.625971	0.738645
FUS-mutant:362	3h matured FUSHspB8 condensates	monolink	26.474	0	26.5876	0	-0.113602	Fresh FUSHspB8 condensates	0.425201	0.557486
FUS-mutant:362:x:FUS-mutant:370	3h matured FUSHspB8 condensates	looplink	26.5936	0	26.8658	0	-0.272195	Fresh FUSHspB8 condensates	0.258585	0.372111
FUS-mutant:370	3h matured FUSHspB8 condensates	monolink	29.2204	0	29.687	0	-0.466611	Fresh FUSHspB8 condensates	0.000140697	0.00138352
