# Supplementary material for: HspB8 prevents aberrant phase transitions of FUS by chaperoning its folded RNA-binding domain
Source: eLife. 2021 Sep 6;10:e69377. doi: 10.7554/eLife.69377 (PMC8510580; doi:10.7554/eLife.69377)
Supplement: Supplementary file 3. [file elife-69377-supp3.xlsx]

## Sheet: Legend
Legends for Supplemental Data 3
Supplemental Table 1. FUSB8 Centrifuge Experiment Crosslink Identification. Related to Figure 2E, 5B, S3G
Supplemental Table 2. FUSB8 Salt Experiment Crosslink Identification. Related to Figure 5B, S2F, S3G
Supplemental Table 3. FUS Lactalbumin Centrifuge Experiment Crosslink Identification. Related to Figure S2I
Supplemental Table 4. FUS-K9B8 Salt Experiment Crosslink Identification. Related to Figure S2G, S3G, 5B
Legend referring to Tables S1, S3, S4 and S5
uxID	unique lysine to lysine crosslinking site, includes crosslinked protein names and absolute position of crosslinked lysine. All peptides linking the same lysines (different cleavage sites, charge states and heavy/light pairs) belong to a single uxID
Id	amino acid sequence of crosslinked peptide a and peptide b including the position of crosslinking sites in peptide a and peptide b
Protein1	name of protein to which peptide a belongs
Protein2	name of protein to which peptide b belongs
XLType	type of linker attachment (inter-protein crosslink, intra-protein crosslink, looplink or monolink).Looplink, a link between two lysines within one peptide.
AbsPos1	absolute position of crosslinked lysine residue in protein 1 (including 5 AA N-terminal tag)
AbsPos2	absolute position of crosslinked lysine residue in protein 2 (including 5 AA N-terminal tag)
deltaS	deltaS score is a measure for how close the best assigned hit scored in regard to second best
ld-Score	linear discriminant score; scoring scheme to discriminate between true positive crosslinks and false positive hits																									FDR	FDR	FDR	FDR	FDR	FDR	FDR	FDR	FDR	FDR	FDR	FDR	FDR	FDR	FDR	FDR	FDR	FDR	FDR	FDR	FDR	FDR	FDR	FDR
FDR	FDR was calculated by xProphet as described (Leitner et al., Nat Protoc, 2014). FDR filtering was done on the uxID level and only uxIDs with an FDR ≤ 0.05 in at least one replicate were considered
No of Ids in triplicates	indicates in how many of three replicates the corresponding uxID was identified
[truncated: 5,000 more columns]

## Sheet: Table S1
Supplemental Table 1. FUSB8 Centrifuge Experiment Crosslink Identification. Related to Figure 2E, 5B, S3G
Crosslinks were only considered, if they were identified in two out of three replicates with a deltaS < 0.95, a minimum Id score ≥ 20 and an ld score ≥ 25 in at least one replicate (filtering was done on the level of the unique Crosslinking site) and a FDR < 0.05 as calculated by xProphet for at least one replicate.
Only the highest scoring crosslink from three replicates is shown.
uxID	Id	Protein1	Protein2	XLType	AbsPos1	AbsPos2	deltaS	ld-Score	FDR	Fraction	No of Ids in triplicates	Experiment
FUS:269:x:HspB8:120	TKDGYVEVSGK-GGFNKFGGPR-a2-b5	HspB8	FUS	inter-protein xl	120	269	0	43.79	0	Pellet	3	Centrifuge 1
FUS:337:x:HspB8:120	TKDGYVEVSGK-ETGKLK-a2-b4	HspB8	FUS	inter-protein xl	120	337	0	32.84	0	Pellet	3	Centrifuge 1
FUS:339:x:HspB8:120	LKGEATVSFDDPPSAK-TKDGYVEVSGK-a2-b2	FUS	HspB8	inter-protein xl	339	120	0	30.08	0	Pellet	3	Centrifuge 1
FUS:339:x:HspB8:133	LKGEATVSFDDPPSAK-HEEKQQEGGIVSK-a2-b4	FUS	HspB8	inter-protein xl	339	133	0.39	28.38	0	Pellet	3	Centrifuge 1
FUS:362:x:HspB8:129	AAIDWFDGKEFSGNPIK-DGYVEVSGKHEEK-a9-b9	FUS	HspB8	inter-protein xl	362	129	0.85	31.83	0	Pellet	3	Centrifuge 1
FUS:370:x:HspB8:118	VCVNVHSFKPEELMVKTK-EFSGNPIKVSFATR-a16-b8	HspB8	FUS	inter-protein xl	118	370	0.77	30.78	0	Pellet	2	Centrifuge 1
FUS:370:x:HspB8:120	EFSGNPIKVSFATR-TKDGYVEVSGK-a8-b2	FUS	HspB8	inter-protein xl	370	120	0.92	31.73	0	Pellet	3	Centrifuge 1
FUS:370:x:HspB8:129	EFSGNPIKVSFATR-DGYVEVSGKHEEK-a8-b9	FUS	HspB8	inter-protein xl	370	129	0	25.34	0	Pellet	3	Centrifuge 1
FUS:515:x:HspB8:120	GGFGPGKMDSR-TKDGYVEVSGK-a7-b2	FUS	HspB8	inter-protein xl	515	120	0.67	34.76	0	Pellet	2	Centrifuge 1
FUS:337:x:HspB8:120	TKDGYVEVSGK-ETGKLK-a2-b4	HspB8	FUS	inter-protein xl	120	337	0	26.22	0	Supernatant	2	Centrifuge 1
FUS:515:x:HspB8:129	DGYVEVSGKHEEK-GGFGPGKMDSR-a9-b7	HspB8	FUS	inter-protein xl	129	515	0	29.41	0	Supernatant	3	Centrifuge 1
FUS:320:x:FUS:321	KTGQPMINLYTDR-TKDGYVEVSGK-a1-b2	FUS	HspB8	inter-protein xl	321	120	0.86	32.79	0	Pellet	2	Centrifuge 2 (comparative experiment for Lactalbumin)
FUS:337:x:FUS:339	VCVNVHSFKPEELMVKTK-AAIDWFDGKEFSGNPIK-a16-b9	HspB8	FUS	inter-protein xl	118	362	0.34	27.95	0	Pellet	2	Centrifuge 2 (comparative experiment for Lactalbumin)
FUS:362:x:FUS:370	AAIDWFDGKEFSGNPIK-TKDGYVEVSGK-a9-b2	FUS	HspB8	inter-protein xl	362	120	0.85	39.3	0	Pellet	3	Centrifuge 2 (comparative experiment for Lactalbumin)
FUS:453:x:FUS:456	AAIDWFDGKEFSGNPIK-DGYVEVSGKHEEK-a9-b9	FUS	HspB8	inter-protein xl	362	129	0.29	36.99	0	Pellet	3	Centrifuge 2 (comparative experiment for Lactalbumin)
HspB8:118:x:HspB8:120	VCVNVHSFKPEELMVKTK-EFSGNPIKVSFATR-a9-b8	HspB8	FUS	inter-protein xl	111	370	0.82	31.23	0	Pellet	2	Centrifuge 2 (comparative experiment for Lactalbumin)
HspB8:129:x:HspB8:133	VCVNVHSFKPEELMVKTK-EFSGNPIKVSFATR-a16-b8	HspB8	FUS	inter-protein xl	118	370	0.83	31.19	0	Pellet	2	Centrifuge 2 (comparative experiment for Lactalbumin)
HspB8:133:x:HspB8:142	EFSGNPIKVSFATR-TKDGYVEVSGK-a8-b2	FUS	HspB8	inter-protein xl	370	120	0.79	26.7	0	Pellet	2	Centrifuge 2 (comparative experiment for Lactalbumin)
HspB8:142:x:HspB8:147	TPPPFPGEPWKVCVNVHSFKPEELMVK-GGFGPGKMDSR-a11-b7	HspB8	FUS	inter-protein xl	102	515	0	26.83	0	Pellet	2	Centrifuge 2 (comparative experiment for Lactalbumin)
FUS:320:x:FUS:321	VCVNVHSFKPEELMVK-GGFGPGKMDSR-a9-b7	HspB8	FUS	inter-protein xl	111	515	0.77	37.43	0	Pellet	2	Centrifuge 2 (comparative experiment for Lactalbumin)
FUS:337:x:FUS:339	GGFGPGKMDSR-TKDGYVEVSGK-a7-b2	FUS	HspB8	inter-protein xl	515	120	0.61	42.8	0	Pellet	3	Centrifuge 2 (comparative experiment for Lactalbumin)
FUS:362:x:FUS:370	TKDGYVEVSGKHEEK-GGFGPGKMDSR-a11-b7	HspB8	FUS	inter-protein xl	129	515	0.68	31.81	0	Pellet	3	Centrifuge 2 (comparative experiment for Lactalbumin)
HspB8:111:x:HspB8:118	ZGPLGSMADGQMPFSCHYPSR-LKGEATVSFDDPPSAK-a1-b2	HspB8	FUS	inter-protein xl	1	339	0	29.11	0	Supernatant	2	Centrifuge 2 (comparative experiment for Lactalbumin)
HspB8:111:x:HspB8:120	DGYVEVSGKHEEK-GGFNKFGGPR-a9-b5	HspB8	FUS	inter-protein xl	129	269	0.4	39.65	0	Pellet	3	Centrifuge 3
HspB8:118:x:HspB8:120	TKDGYVEVSGK-QIGIIKTNK-a2-b6	HspB8	FUS	inter-protein xl	120	317	0.67	36.97	0	Pellet	3	Centrifuge 3
HspB8:129:x:HspB8:133	KTGQPMINLYTDR-TKDGYVEVSGK-a1-b2	FUS	HspB8	inter-protein xl	321	120	0	41.11	0	Pellet	3	Centrifuge 3
HspB8:133:x:HspB8:142	DGYVEVSGKHEEK-KTGQPMINLYTDR-a9-b1	HspB8	FUS	inter-protein xl	129	321	0	37.59	0	Pellet	3	Centrifuge 3
HspB8:142:x:HspB8:146	HEEKQQEGGIVSK-KTGQPMINLYTDR-a4-b1	HspB8	FUS	inter-protein xl	133	321	0	25.03	0.048	Pellet	2	Centrifuge 3
FUS:269:x:FUS:317	VCVNVHSFKPEELMVK-ETGKLK-a9-b4	HspB8	FUS	inter-protein xl	111	337	0.44	29.86	0	Pellet	3	Centrifuge 3
FUS:269:x:FUS:339	VCVNVHSFKPEELMVKTK-ETGKLK-a16-b4	HspB8	FUS	inter-protein xl	118	337	0.63	28.81	0	Pellet	3	Centrifuge 3
FUS:269:x:FUS:370	TKDGYVEVSGK-ETGKLK-a2-b4	HspB8	FUS	inter-protein xl	120	337	0.32	33.19	0	Pellet	3	Centrifuge 3
FUS:317:x:FUS:321	DGYVEVSGKHEEK-ETGKLK-a9-b4	HspB8	FUS	inter-protein xl	129	337	0.75	31.41	0	Pellet	2	Centrifuge 3
FUS:317:x:FUS:337	HEEKQQEGGIVSK-ETGKLK-a4-b4	HspB8	FUS	inter-protein xl	133	337	0.55	32.22	0	Pellet	3	Centrifuge 3
FUS:317:x:FUS:339	LKGEATVSFDDPPSAK-VCVNVHSFKPEELMVK-a2-b9	FUS	HspB8	inter-protein xl	339	111	0	32.23	0	Pellet	3	Centrifuge 3
FUS:337:x:FUS:339	LKGEATVSFDDPPSAK-TKDGYVEVSGK-a2-b2	FUS	HspB8	inter-protein xl	339	120	0	39.92	0	Pellet	3	Centrifuge 3
FUS:339:x:FUS:370	LKGEATVSFDDPPSAK-HEEKQQEGGIVSK-a2-b4	FUS	HspB8	inter-protein xl	339	133	0.27	29.47	0	Pellet	3	Centrifuge 3
FUS:339:x:FUS:515	AAIDWFDGKEFSGNPIK-TKDGYVEVSGK-a9-b2	FUS	HspB8	inter-protein xl	362	120	0.78	43.62	0	Pellet	3	Centrifuge 3
FUS:370:x:FUS:515	AAIDWFDGKEFSGNPIK-DGYVEVSGKHEEK-a9-b9	FUS	HspB8	inter-protein xl	362	129	0.37	45.67	0	Pellet	3	Centrifuge 3
HspB8:111:x:HspB8:120	VCVNVHSFKPEELMVKTK-EFSGNPIKVSFATR-a9-b8	HspB8	FUS	inter-protein xl	111	370	0.93	28.22	0.037	Pellet	3	Centrifuge 3
HspB8:111:x:HspB8:129	VCVNVHSFKPEELMVKTK-EFSGNPIKVSFATR-a16-b8	HspB8	FUS	inter-protein xl	118	370	0.8	35.49	0	Pellet	3	Centrifuge 3
HspB8:111:x:HspB8:133	EFSGNPIKVSFATR-TKDGYVEVSGK-a8-b2	FUS	HspB8	inter-protein xl	370	120	0.82	36.77	0	Pellet	3	Centrifuge 3
HspB8:118:x:HspB8:129	EFSGNPIKVSFATR-DGYVEVSGKHEEK-a8-b9	FUS	HspB8	inter-protein xl	370	129	0.85	32.38	0	Pellet	3	Centrifuge 3
HspB8:120:x:HspB8:120	EFSGNPIKVSFATR-HEEKQQEGGIVSK-a8-b4	FUS	HspB8	inter-protein xl	370	133	0.73	41.04	0	Pellet	3	Centrifuge 3
HspB8:120:x:HspB8:129	AGDWKCPNPTCENMNFSWR-TKDGYVEVSGK-a5-b2	FUS	HspB8	inter-protein xl	432	120	0.75	42.94	0	Pellet	3	Centrifuge 3
HspB8:120:x:HspB8:133	APKPDGPGGGPGGSHMGGNYGDDR-VCVNVHSFKPEELMVK-a3-b9	FUS	HspB8	inter-protein xl	456	111	0	26.36	0	Pellet	3	Centrifuge 3
HspB8:129:x:HspB8:129	APKPDGPGGGPGGSHMGGNYGDDR-TKDGYVEVSGK-a3-b2	FUS	HspB8	inter-protein xl	456	120	0.6	37.58	0	Pellet	3	Centrifuge 3
HspB8:129:x:HspB8:133	APKPDGPGGGPGGSHMGGNYGDDR-DGYVEVSGKHEEK-a3-b9	FUS	HspB8	inter-protein xl	456	129	0	36.14	0	Pellet	2	Centrifuge 3
HspB8:133:x:HspB8:133	TPPPFPGEPWKVCVNVHSFKPEELMVK-GGFGPGKMDSR-a11-b7	HspB8	FUS	inter-protein xl	102	515	0	35.25	0	Pellet	3	Centrifuge 3
FUS:269:x:FUS:317	VCVNVHSFKPEELMVK-GGFGPGKMDSR-a9-b7	HspB8	FUS	inter-protein xl	111	515	0.69	39.12	0	Pellet	3	Centrifuge 3
FUS:269:x:FUS:321	VCVNVHSFKPEELMVKTK-GGFGPGKMDSR-a16-b7	HspB8	FUS	inter-protein xl	118	515	0.67	32.82	0	Pellet	2	Centrifuge 3
FUS:269:x:FUS:339	GGFGPGKMDSR-TKDGYVEVSGK-a7-b2	FUS	HspB8	inter-protein xl	515	120	0.65	36.18	0	Pellet	3	Centrifuge 3
FUS:269:x:FUS:362	DGYVEVSGKHEEK-GGFGPGKMDSR-a9-b7	HspB8	FUS	inter-protein xl	129	515	0.51	41.34	0	Pellet	3	Centrifuge 3
FUS:269:x:FUS:370	HEEKQQEGGIVSK-GGFGPGKMDSR-a4-b7	HspB8	FUS	inter-protein xl	133	515	0.79	36.19	0	Pellet	3	Centrifuge 3
FUS:317:x:FUS:321	TKDGYVEVSGK-ETGKLK-a2-b4	HspB8	FUS	inter-protein xl	120	337	0	30.61	0	Supernatant	3	Centrifuge 3
FUS:337:x:FUS:370	LKGEATVSFDDPPSAK-TKDGYVEVSGK-a2-b2	FUS	HspB8	inter-protein xl	339	120	0.35	30.48	0	Supernatant	2	Centrifuge 3
FUS:339:x:FUS:370	VCVNVHSFKPEELMVKTK-EFSGNPIKVSFATR-a16-b8	HspB8	FUS	inter-protein xl	118	370	0.81	31.26	0	Supernatant	3	Centrifuge 3
FUS:339:x:FUS:432	AGDWKCPNPTCENMNFSWR-TKDGYVEVSGK-a5-b2	FUS	HspB8	inter-protein xl	432	120	0.3	42.88	0	Supernatant	3	Centrifuge 3
FUS:339:x:FUS:453	VCVNVHSFKPEELMVK-GGFGPGKMDSR-a9-b7	HspB8	FUS	inter-protein xl	111	515	0.69	35.81	0	Supernatant	3	Centrifuge 3
FUS:339:x:FUS:456	DGYVEVSGKHEEK-GGFGPGKMDSR-a9-b7	HspB8	FUS	inter-protein xl	129	515	0	31.84	0	Supernatant	2	Centrifuge 3
FUS:339:x:FUS:515	TNKKTGQPMINLYTDR-K3-K4	FUS	-	looplink	320	321	0	36.69	0	Pellet	2	Centrifuge 1
FUS:362:x:FUS:432	ETGKLKGEATVSFDDPPSAK-K4-K6	FUS	-	looplink	337	339	0	32.03	0	Pellet	3	Centrifuge 1
FUS:432:x:FUS:456	AAIDWFDGKEFSGNPIKVSFATR-K9-K17	FUS	-	looplink	362	370	0	36.89	0	Pellet	3	Centrifuge 1
FUS:432:x:FUS:515	NECNQCKAPKPDGPGGGPGGSHMGGNYGDDR-K7-K10	FUS	-	looplink	453	456	0.04	28.16	0	Pellet	3	Centrifuge 1
FUS:453:x:FUS:515	VCVNVHSFKPEELMVKTKDGYVEVSGK-K16-K18	HspB8	-	looplink	118	120	0	44.61	0	Pellet	3	Centrifuge 1
FUS:456:x:FUS:515	DGYVEVSGKHEEKQQEGGIVSK-K9-K13	HspB8	-	looplink	129	133	0	43.8	0	Pellet	3	Centrifuge 1
HspB8:111:x:HspB8:120	HEEKQQEGGIVSKNFTK-K4-K13	HspB8	-	looplink	133	142	0.26	32.36	0	Pellet	3	Centrifuge 1
HspB8:111:x:HspB8:129	QQEGGIVSKNFTKK-K9-K14	HspB8	-	looplink	142	147	0.49	32.59	0	Pellet	3	Centrifuge 1
HspB8:111:x:HspB8:133	TNKKTGQPMINLYTDR-K3-K4	FUS	-	looplink	320	321	0	32.09	0	Supernatant	3	Centrifuge 1
HspB8:118:x:HspB8:129	ETGKLKGEATVSFDDPPSAK-K4-K6	FUS	-	looplink	337	339	0	33.76	0	Supernatant	3	Centrifuge 1
HspB8:120:x:HspB8:129	AAIDWFDGKEFSGNPIKVSFATR-K9-K17	FUS	-	looplink	362	370	0	32.72	0	Supernatant	3	Centrifuge 1
HspB8:120:x:HspB8:133	VCVNVHSFKPEELMVKTKDGYVEVSGK-K9-K16	HspB8	-	looplink	111	118	0	35.25	0	Supernatant	3	Centrifuge 1
HspB8:129:x:HspB8:129	VCVNVHSFKPEELMVKTKDGYVEVSGK-K9-K18	HspB8	-	looplink	111	120	0	36.24	0	Supernatant	3	Centrifuge 1
HspB8:129:x:HspB8:133	VCVNVHSFKPEELMVKTKDGYVEVSGK-K16-K18	HspB8	-	looplink	118	120	0	53.01	0	Supernatant	3	Centrifuge 1
FUS:339	DGYVEVSGKHEEKQQEGGIVSK-K9-K13	HspB8	-	looplink	129	133	0	43.23	0	Supernatant	3	Centrifuge 1
FUS:353	HEEKQQEGGIVSKNFTK-K4-K13	HspB8	-	looplink	133	142	0.17	27.02	0	Supernatant	3	Centrifuge 1
FUS:362	QQEGGIVSKNFTKK-K9-K13	HspB8	-	looplink	142	146	0.49	32.16	0	Supernatant	3	Centrifuge 1
FUS:370	TNKKTGQPMINLYTDR-K3-K4	FUS	-	looplink	320	321	0	36.71	0	Pellet	3	Centrifuge 2 (comparative experiment for Lactalbumin)
FUS:432	ETGKLKGEATVSFDDPPSAK-K4-K6	FUS	-	looplink	337	339	0	40.48	0	Pellet	3	Centrifuge 2 (comparative experiment for Lactalbumin)
FUS:453	GEATVSFDDPPSAKAAIDWFDGKEFSGNPIK-K14-K23	FUS	-	looplink	353	362	0.08	34.71	0	Pellet	3	Centrifuge 2 (comparative experiment for Lactalbumin)
FUS:456	AAIDWFDGKEFSGNPIKVSFATR-K9-K17	FUS	-	looplink	362	370	0	40.99	0	Pellet	3	Centrifuge 2 (comparative experiment for Lactalbumin)
HspB8:111	NECNQCKAPKPDGPGGGPGGSHMGGNYGDDR-K7-K10	FUS	-	looplink	453	456	0.08	30.44	0	Pellet	3	Centrifuge 2 (comparative experiment for Lactalbumin)
HspB8:118	TPPPFPGEPWKVCVNVHSFKPEELMVK-K11-K20	HspB8	-	looplink	102	111	0	25.4	0	Pellet	3	Centrifuge 2 (comparative experiment for Lactalbumin)
HspB8:120	VCVNVHSFKPEELMVKTK-K9-K16	HspB8	-	looplink	111	118	0.38	38.07	0	Pellet	3	Centrifuge 2 (comparative experiment for Lactalbumin)
HspB8:129	VCVNVHSFKPEELMVKTKDGYVEVSGK-K9-K18	HspB8	-	looplink	111	120	0	33.08	0	Pellet	3	Centrifuge 2 (comparative experiment for Lactalbumin)
HspB8:133	VCVNVHSFKPEELMVKTKDGYVEVSGK-K16-K18	HspB8	-	looplink	118	120	0	37.9	0	Pellet	3	Centrifuge 2 (comparative experiment for Lactalbumin)
FUS:339	DGYVEVSGKHEEKQQEGGIVSK-K9-K13	HspB8	-	looplink	129	133	0.05	44.25	0	Pellet	3	Centrifuge 2 (comparative experiment for Lactalbumin)
FUS:353	DGYVEVSGKHEEKQQEGGIVSK-K9-K22	HspB8	-	looplink	129	142	0.11	31.53	0	Pellet	3	Centrifuge 2 (comparative experiment for Lactalbumin)
FUS:362	HEEKQQEGGIVSKNFTK-K4-K13	HspB8	-	looplink	133	142	0.31	30.2	0	Pellet	3	Centrifuge 2 (comparative experiment for Lactalbumin)
FUS:370	QQEGGIVSKNFTKK-K9-K13	HspB8	-	looplink	142	146	0	30.63	0	Pellet	3	Centrifuge 2 (comparative experiment for Lactalbumin)
FUS:432	HDSEQDNSDNNTIFVQGLGENVTIESVADYFKQIGIIKTNK-K32-K38	FUS	-	looplink	311	317	0	30.07	0	Supernatant	2	Centrifuge 2 (comparative experiment for Lactalbumin)
FUS:453	TNKKTGQPMINLYTDR-K3-K4	FUS	-	looplink	320	321	0	38.03	0	Supernatant	3	Centrifuge 2 (comparative experiment for Lactalbumin)
FUS:456	ETGKLKGEATVSFDDPPSAK-K4-K6	FUS	-	looplink	337	339	0	42.67	0	Supernatant	3	Centrifuge 2 (comparative experiment for Lactalbumin)
HspB8:102	GEATVSFDDPPSAKAAIDWFDGKEFSGNPIK-K14-K23	FUS	-	looplink	353	362	0.12	33.83	0	Supernatant	2	Centrifuge 2 (comparative experiment for Lactalbumin)
HspB8:111	AAIDWFDGKEFSGNPIKVSFATR-K9-K17	FUS	-	looplink	362	370	0	40.36	0	Supernatant	3	Centrifuge 2 (comparative experiment for Lactalbumin)
HspB8:118	NECNQCKAPKPDGPGGGPGGSHMGGNYGDDR-K7-K10	FUS	-	looplink	453	456	0	32.68	0	Supernatant	3	Centrifuge 2 (comparative experiment for Lactalbumin)
HspB8:120	TPPPFPGEPWKVCVNVHSFKPEELMVK-K11-K20	HspB8	-	looplink	102	111	0	29.74	0	Supernatant	2	Centrifuge 2 (comparative experiment for Lactalbumin)
HspB8:129	VCVNVHSFKPEELMVKTKDGYVEVSGK-K9-K16	HspB8	-	looplink	111	118	0	39.76	0	Supernatant	3	Centrifuge 2 (comparative experiment for Lactalbumin)
HspB8:133	VCVNVHSFKPEELMVKTKDGYVEVSGK-K9-K18	HspB8	-	looplink	111	120	0	37.72	0	Supernatant	3	Centrifuge 2 (comparative experiment for Lactalbumin)
FUS:321:x:HspB8:120	VCVNVHSFKPEELMVKTKDGYVEVSGK-K16-K18	HspB8	-	looplink	118	120	0	51.13	0	Supernatant	3	Centrifuge 2 (comparative experiment for Lactalbumin)
FUS:362:x:HspB8:118	DGYVEVSGKHEEKQQEGGIVSK-K9-K13	HspB8	-	looplink	129	133	0.13	44.54	0	Supernatant	3	Centrifuge 2 (comparative experiment for Lactalbumin)
FUS:362:x:HspB8:120	DGYVEVSGKHEEKQQEGGIVSK-K9-K22	HspB8	-	looplink	129	142	0	28.66	0	Supernatant	3	Centrifuge 2 (comparative experiment for Lactalbumin)
FUS:362:x:HspB8:129	HEEKQQEGGIVSKNFTK-K4-K13	HspB8	-	looplink	133	142	0.29	32.47	0	Supernatant	3	Centrifuge 2 (comparative experiment for Lactalbumin)
FUS:370:x:HspB8:111	QQEGGIVSKNFTKK-K9-K13	HspB8	-	looplink	142	146	0	35.04	0	Supernatant	2	Centrifuge 2 (comparative experiment for Lactalbumin)
FUS:370:x:HspB8:118	HDSEQDNSDNNTIFVQGLGENVTIESVADYFKQIGIIKTNK-K32-K38	FUS	-	looplink	311	317	0	36.89	0	Pellet	3	Centrifuge 3
FUS:370:x:HspB8:120	TNKKTGQPMINLYTDR-K3-K4	FUS	-	looplink	320	321	0	36.76	0	Pellet	3	Centrifuge 3
FUS:515:x:HspB8:102	ETGKLKGEATVSFDDPPSAK-K4-K6	FUS	-	looplink	337	339	0	42.92	0	Pellet	3	Centrifuge 3
FUS:515:x:HspB8:111	LKGEATVSFDDPPSAKAAIDWFDGK-K2-K16	FUS	-	looplink	339	353	0.12	25.13	0	Pellet	3	Centrifuge 3
FUS:515:x:HspB8:120	GEATVSFDDPPSAKAAIDWFDGKEFSGNPIK-K14-K23	FUS	-	looplink	353	362	0.08	34.83	0	Pellet	3	Centrifuge 3
FUS:515:x:HspB8:129	AAIDWFDGKEFSGNPIKVSFATR-K9-K17	FUS	-	looplink	362	370	0	37.36	0	Pellet	3	Centrifuge 3
FUS:339:x:HspB8:	NECNQCKAPKPDGPGGGPGGSHMGGNYGDDR-K7-K10	FUS	-	looplink	453	456	0	34.42	0	Pellet	3	Centrifuge 3
FUS:320:x:FUS:321	TPPPFPGEPWKVCVNVHSFKPEELMVK-K11-K20	HspB8	-	looplink	102	111	0	27.55	0	Pellet	3	Centrifuge 3
FUS:337:x:FUS:339	VCVNVHSFKPEELMVKTK-K9-K16	HspB8	-	looplink	111	118	0.35	36.01	0	Pellet	3	Centrifuge 3
FUS:353:x:FUS:362	VCVNVHSFKPEELMVKTK-K9-K18	HspB8	-	looplink	111	120	0.39	32.33	0	Pellet	2	Centrifuge 3
FUS:362:x:FUS:370	VCVNVHSFKPEELMVKTKDGYVEVSGK-K16-K18	HspB8	-	looplink	118	120	0	48.17	0	Pellet	3	Centrifuge 3
FUS:453:x:FUS:456	TKDGYVEVSGKHEEK-K2-K11	HspB8	-	looplink	120	129	0.48	25.86	0	Pellet	2	Centrifuge 3
HspB8:102:x:HspB8:111	DGYVEVSGKHEEKQQEGGIVSK-K9-K13	HspB8	-	looplink	129	133	0.1	47.36	0	Pellet	3	Centrifuge 3
HspB8:111:x:HspB8:118	HEEKQQEGGIVSKNFTK-K4-K13	HspB8	-	looplink	133	142	0.33	35.41	0	Pellet	3	Centrifuge 3
HspB8:111:x:HspB8:120	QQEGGIVSKNFTKK-K9-K13	HspB8	-	looplink	142	146	0.41	35.49	0	Pellet	2	Centrifuge 3
HspB8:118:x:HspB8:120	QQEGGIVSKNFTKK-K9-K14	HspB8	-	looplink	142	147	0.42	29.53	0	Pellet	2	Centrifuge 3
HspB8:129:x:HspB8:133	HDSEQDNSDNNTIFVQGLGENVTIESVADYFKQIGIIKTNK-K32-K38	FUS	-	looplink	311	317	0	32.42	0	Supernatant	3	Centrifuge 3
HspB8:129:x:HspB8:142	TNKKTGQPMINLYTDR-K3-K4	FUS	-	looplink	320	321	0	35.99	0	Supernatant	3	Centrifuge 3
HspB8:133:x:HspB8:142	ETGKLKGEATVSFDDPPSAK-K4-K6	FUS	-	looplink	337	339	0	41.66	0	Supernatant	3	Centrifuge 3
HspB8:142:x:HspB8:146	GEATVSFDDPPSAKAAIDWFDGKEFSGNPIK-K14-K23	FUS	-	looplink	353	362	0.12	34.6	0	Supernatant	3	Centrifuge 3
FUS:311:x:FUS:317	AAIDWFDGKEFSGNPIKVSFATR-K9-K17	FUS	-	looplink	362	370	0	40.79	0	Supernatant	3	Centrifuge 3
FUS:320:x:FUS:321	NECNQCKAPKPDGPGGGPGGSHMGGNYGDDR-K7-K10	FUS	-	looplink	453	456	0.03	35.58	0	Supernatant	3	Centrifuge 3
FUS:337:x:FUS:339	VCVNVHSFKPEELMVKTK-K9-K16	HspB8	-	looplink	111	118	0.36	34.77	0	Supernatant	3	Centrifuge 3
FUS:353:x:FUS:362	VCVNVHSFKPEELMVKTKDGYVEVSGK-K9-K18	HspB8	-	looplink	111	120	0	40.95	0	Supernatant	3	Centrifuge 3
FUS:362:x:FUS:370	VCVNVHSFKPEELMVKTKDGYVEVSGK-K16-K18	HspB8	-	looplink	118	120	0	53.28	0	Supernatant	3	Centrifuge 3
FUS:453:x:FUS:456	TKDGYVEVSGKHEEK-K2-K11	HspB8	-	looplink	120	129	0.3	26.05	0	Supernatant	2	Centrifuge 3
HspB8:102:x:HspB8:111	DGYVEVSGKHEEKQQEGGIVSK-K9-K13	HspB8	-	looplink	129	133	0.11	50.13	0	Supernatant	3	Centrifuge 3
HspB8:111:x:HspB8:118	HEEKQQEGGIVSKNFTK-K4-K13	HspB8	-	looplink	133	142	0.26	37.81	0	Supernatant	3	Centrifuge 3
HspB8:111:x:HspB8:120	QQEGGIVSKNFTKK-K9-K13	HspB8	-	looplink	142	146	0.39	37.48	0	Supernatant	3	Centrifuge 3
HspB8:118:x:HspB8:120	QQEGGIVSKNFTKK-K9-K14	HspB8	-	looplink	142	147	0.4	31.33	0	Supernatant	2	Centrifuge 3
HspB8:129:x:HspB8:133	GGFNKFGGPR-QIGIIKTNK-a5-b6	FUS	FUS	intra-protein xl	269	317	0.81	28.1	0.059	Pellet	2	Centrifuge 1
HspB8:129:x:HspB8:142	LKGEATVSFDDPPSAK-GGFNKFGGPR-a2-b5	FUS	FUS	intra-protein xl	339	269	0.26	32.74	0.059	Pellet	2	Centrifuge 1
HspB8:133:x:HspB8:142	EFSGNPIKVSFATR-GGFNKFGGPR-a8-b5	FUS	FUS	intra-protein xl	370	269	0	31.5	0	Pellet	3	Centrifuge 1
HspB8:142:x:HspB8:146	KTGQPMINLYTDR-QIGIIKTNK-a1-b6	FUS	FUS	intra-protein xl	321	317	0	33.36	0.059	Pellet	3	Centrifuge 1
FUS:269:x:FUS:321	QIGIIKTNK-ETGKLK-a6-b4	FUS	FUS	intra-protein xl	317	337	0.62	26.49	0	Pellet	3	Centrifuge 1
FUS:269:x:FUS:339	LKGEATVSFDDPPSAK-QIGIIKTNK-a2-b6	FUS	FUS	intra-protein xl	339	317	0.83	33.56	0	Pellet	2	Centrifuge 1
FUS:269:x:FUS:362	LKGEATVSFDDPPSAK-ETGKLK-a2-b4	FUS	FUS	intra-protein xl	339	337	0.38	25.74	0	Pellet	2	Centrifuge 1
FUS:269:x:FUS:456	LKGEATVSFDDPPSAK-EFSGNPIKVSFATR-a2-b8	FUS	FUS	intra-protein xl	339	370	0.3	34.69	0	Pellet	3	Centrifuge 1
FUS:269:x:FUS:515	LKGEATVSFDDPPSAK-GGFGPGKMDSR-a2-b7	FUS	FUS	intra-protein xl	339	515	0	36.58	0	Pellet	2	Centrifuge 1
FUS:317:x:FUS:321	EFSGNPIKVSFATR-GGFGPGKMDSR-a8-b7	FUS	FUS	intra-protein xl	370	515	0	35.12	0	Pellet	2	Centrifuge 1
FUS:317:x:FUS:362	VCVNVHSFKPEELMVK-TKDGYVEVSGK-a9-b2	HspB8	HspB8	intra-protein xl	111	120	0.8	37.3	0	Pellet	2	Centrifuge 1
FUS:317:x:FUS:515	VCVNVHSFKPEELMVK-DGYVEVSGKHEEK-a9-b9	HspB8	HspB8	intra-protein xl	111	129	0.52	30.48	0.059	Pellet	3	Centrifuge 1
FUS:321:x:FUS:339	VCVNVHSFKPEELMVK-HEEKQQEGGIVSK-a9-b4	HspB8	HspB8	intra-protein xl	111	133	0.61	34.11	0	Pellet	2	Centrifuge 1
FUS:321:x:FUS:432	VCVNVHSFKPEELMVKTK-DGYVEVSGKHEEK-a16-b9	HspB8	HspB8	intra-protein xl	118	129	0.67	38.23	0	Pellet	3	Centrifuge 1
FUS:337:x:FUS:370	TKDGYVEVSGK-TKDGYVEVSGK-a2-b2	HspB8	HspB8	intra-protein xl	120	120	0	40.17	0	Pellet	3	Centrifuge 1
FUS:339:x:FUS:362	DGYVEVSGKHEEK-TKDGYVEVSGK-a9-b2	HspB8	HspB8	intra-protein xl	129	120	0.73	44.42	0	Pellet	3	Centrifuge 1
FUS:339:x:FUS:515	HEEKQQEGGIVSK-TKDGYVEVSGK-a4-b2	HspB8	HspB8	intra-protein xl	133	120	0	49.22	0	Pellet	3	Centrifuge 1
FUS:353:x:FUS:370	DGYVEVSGKHEEK-DGYVEVSGKHEEK-a9-b9	HspB8	HspB8	intra-protein xl	129	129	0	36.66	0	Pellet	3	Centrifuge 1
FUS:362:x:FUS:370	DGYVEVSGKHEEK-HEEKQQEGGIVSK-a9-b4	HspB8	HspB8	intra-protein xl	129	133	0.82	34.03	0	Pellet	3	Centrifuge 1
FUS:362:x:FUS:456	HEEKQQEGGIVSK-HEEKQQEGGIVSK-a4-b4	HspB8	HspB8	intra-protein xl	133	133	0.76	40.02	0	Pellet	3	Centrifuge 1
FUS:362:x:FUS:515	GGFNKFGGPR-QIGIIKTNK-a5-b6	FUS	FUS	intra-protein xl	269	317	0.71	34.15	0	Supernatant	2	Centrifuge 1
FUS:370:x:FUS:515	KTGQPMINLYTDR-GGFNKFGGPR-a1-b5	FUS	FUS	intra-protein xl	321	269	0	39.29	0	Supernatant	3	Centrifuge 1
FUS:432:x:FUS:456	LKGEATVSFDDPPSAK-GGFNKFGGPR-a2-b5	FUS	FUS	intra-protein xl	339	269	0.42	31.85	0	Supernatant	2	Centrifuge 1
FUS:432:x:FUS:515	AAIDWFDGKEFSGNPIK-GGFNKFGGPR-a9-b5	FUS	FUS	intra-protein xl	362	269	0.22	29.62	0	Supernatant	3	Centrifuge 1
FUS:456:x:FUS:515	EFSGNPIKVSFATR-GGFNKFGGPR-a8-b5	FUS	FUS	intra-protein xl	370	269	0	36.53	0	Supernatant	3	Centrifuge 1
HspB8:111:x:HspB8:120	KTGQPMINLYTDR-QIGIIKTNK-a1-b6	FUS	FUS	intra-protein xl	321	317	0.91	30.46	0	Supernatant	3	Centrifuge 1
HspB8:111:x:HspB8:129	EFSGNPIKVSFATR-ETGKLK-a8-b4	FUS	FUS	intra-protein xl	370	337	0.36	31.12	0	Supernatant	3	Centrifuge 1
HspB8:118:x:HspB8:129	LKGEATVSFDDPPSAK-EFSGNPIKVSFATR-a2-b8	FUS	FUS	intra-protein xl	339	370	0.19	36.75	0	Supernatant	3	Centrifuge 1
HspB8:120:x:HspB8:129	AGDWKCPNPTCENMNFSWR-LKGEATVSFDDPPSAK-a5-b2	FUS	FUS	intra-protein xl	432	339	0	36.83	0	Supernatant	3	Centrifuge 1
HspB8:120:x:HspB8:133	NECNQCKAPKPDGPGGGPGGSHMGGNYGDDR-LKGEATVSFDDPPSAK-a7-b2	FUS	FUS	intra-protein xl	453	339	0.91	31.07	0	Supernatant	3	Centrifuge 1
HspB8:129:x:HspB8:129	APKPDGPGGGPGGSHMGGNYGDDR-LKGEATVSFDDPPSAK-a3-b2	FUS	FUS	intra-protein xl	456	339	0	30.09	0	Supernatant	3	Centrifuge 1
HspB8:129:x:HspB8:142	LKGEATVSFDDPPSAK-GGFGPGKMDSR-a2-b7	FUS	FUS	intra-protein xl	339	515	0	38.76	0	Supernatant	3	Centrifuge 1
FUS:269:x:FUS:321	AGDWKCPNPTCENMNFSWR-AAIDWFDGKEFSGNPIK-a5-b9	FUS	FUS	intra-protein xl	432	362	0.66	41.08	0	Supernatant	2	Centrifuge 1
FUS:269:x:FUS:339	APKPDGPGGGPGGSHMGGNYGDDR-AGDWKCPNPTCENMNFSWR-a3-b5	FUS	FUS	intra-protein xl	456	432	0	33.35	0	Supernatant	2	Centrifuge 1
FUS:269:x:FUS:362	AGDWKCPNPTCENMNFSWR-GGFGPGKMDSR-a5-b7	FUS	FUS	intra-protein xl	432	515	0	42.61	0	Supernatant	3	Centrifuge 1
FUS:269:x:FUS:432	NECNQCKAPKPDGPGGGPGGSHMGGNYGDDR-GGFGPGKMDSR-a7-b7	FUS	FUS	intra-protein xl	453	515	0.65	32.21	0	Supernatant	3	Centrifuge 1
FUS:269:x:FUS:453	APKPDGPGGGPGGSHMGGNYGDDR-GGFGPGKMDSR-a3-b7	FUS	FUS	intra-protein xl	456	515	0	29.35	0	Supernatant	3	Centrifuge 1
FUS:269:x:FUS:456	VCVNVHSFKPEELMVK-TKDGYVEVSGK-a9-b2	HspB8	HspB8	intra-protein xl	111	120	0.59	39.19	0	Supernatant	3	Centrifuge 1
FUS:317:x:FUS:321	VCVNVHSFKPEELMVK-DGYVEVSGKHEEK-a9-b9	HspB8	HspB8	intra-protein xl	111	129	0.64	35.81	0	Supernatant	3	Centrifuge 1
FUS:317:x:FUS:362	VCVNVHSFKPEELMVK-HEEKQQEGGIVSK-a9-b4	HspB8	HspB8	intra-protein xl	111	133	0.52	47.74	0	Supernatant	3	Centrifuge 1
FUS:321:x:FUS:432	VCVNVHSFKPEELMVKTK-DGYVEVSGKHEEK-a16-b9	HspB8	HspB8	intra-protein xl	118	129	0.64	36.34	0	Supernatant	3	Centrifuge 1
FUS:321:x:FUS:453	DGYVEVSGKHEEK-TKDGYVEVSGK-a9-b2	HspB8	HspB8	intra-protein xl	129	120	0.46	39.49	0	Supernatant	3	Centrifuge 1
FUS:321:x:FUS:456	HEEKQQEGGIVSK-TKDGYVEVSGK-a4-b2	HspB8	HspB8	intra-protein xl	133	120	0	48.58	0	Supernatant	3	Centrifuge 1
FUS:337:x:FUS:370	DGYVEVSGKHEEK-DGYVEVSGKHEEK-a9-b9	HspB8	HspB8	intra-protein xl	129	129	0	36.72	0	Supernatant	3	Centrifuge 1
FUS:339:x:FUS:362	DGYVEVSGKHEEK-HEEKQQEGGIVSK-a9-b4	HspB8	HspB8	intra-protein xl	129	133	0.89	29.36	0	Supernatant	3	Centrifuge 1
FUS:339:x:FUS:370	KTGQPMINLYTDR-GGFNKFGGPR-a1-b5	FUS	FUS	intra-protein xl	321	269	0	38.37	0	Pellet	3	Centrifuge 2 (comparative experiment for Lactalbumin)
FUS:339:x:FUS:432	LKGEATVSFDDPPSAK-GGFNKFGGPR-a2-b5	FUS	FUS	intra-protein xl	339	269	0	40.71	0	Pellet	3	Centrifuge 2 (comparative experiment for Lactalbumin)
FUS:339:x:FUS:453	AAIDWFDGKEFSGNPIK-GGFNKFGGPR-a9-b5	FUS	FUS	intra-protein xl	362	269	0.29	33.43	0	Pellet	2	Centrifuge 2 (comparative experiment for Lactalbumin)
FUS:339:x:FUS:456	APKPDGPGGGPGGSHMGGNYGDDR-GGFNKFGGPR-a3-b5	FUS	FUS	intra-protein xl	456	269	0	34	0	Pellet	2	Centrifuge 2 (comparative experiment for Lactalbumin)
FUS:339:x:FUS:515	GGFGPGKMDSR-GGFNKFGGPR-a7-b5	FUS	FUS	intra-protein xl	515	269	0	39.41	0	Pellet	2	Centrifuge 2 (comparative experiment for Lactalbumin)
FUS:362:x:FUS:432	KTGQPMINLYTDR-QIGIIKTNK-a1-b6	FUS	FUS	intra-protein xl	321	317	0	31.54	0.188	Pellet	3	Centrifuge 2 (comparative experiment for Lactalbumin)
FUS:362:x:FUS:453	AAIDWFDGKEFSGNPIK-QIGIIKTNKK-a9-b6	FUS	FUS	intra-protein xl	362	317	0.2	30.14	0	Pellet	3	Centrifuge 2 (comparative experiment for Lactalbumin)
FUS:362:x:FUS:456	GGFGPGKMDSR-QIGIIKTNK-a7-b6	FUS	FUS	intra-protein xl	515	317	0.83	30.81	0.032	Pellet	2	Centrifuge 2 (comparative experiment for Lactalbumin)
FUS:362:x:FUS:515	LKGEATVSFDDPPSAK-KTGQPMINLYTDR-a2-b1	FUS	FUS	intra-protein xl	339	321	0.54	39.4	0	Pellet	3	Centrifuge 2 (comparative experiment for Lactalbumin)
FUS:370:x:FUS:432	AGDWKCPNPTCENMNFSWR-KTGQPMINLYTDR-a5-b1	FUS	FUS	intra-protein xl	432	321	0.62	32.17	0	Pellet	2	Centrifuge 2 (comparative experiment for Lactalbumin)
FUS:370:x:FUS:453	EFSGNPIKVSFATR-ETGKLK-a8-b4	FUS	FUS	intra-protein xl	370	337	0.24	31.56	0.032	Pellet	3	Centrifuge 2 (comparative experiment for Lactalbumin)
FUS:370:x:FUS:456	AAIDWFDGKEFSGNPIK-LKGEATVSFDDPPSAK-a9-b2	FUS	FUS	intra-protein xl	362	339	0	46.26	0	Pellet	3	Centrifuge 2 (comparative experiment for Lactalbumin)
FUS:370:x:FUS:515	LKGEATVSFDDPPSAK-GGFGPGKMDSR-a2-b7	FUS	FUS	intra-protein xl	339	515	0	38.75	0	Pellet	3	Centrifuge 2 (comparative experiment for Lactalbumin)
FUS:432:x:FUS:453	LKGEATVSFDDPPSAKAAIDWFDGK-EFSGNPIKVSFATR-a16-b8	FUS	FUS	intra-protein xl	353	370	0.54	28.34	0	Pellet	2	Centrifuge 2 (comparative experiment for Lactalbumin)
FUS:432:x:FUS:456	AAIDWFDGKEFSGNPIK-EFSGNPIKVSFATR-a9-b8	FUS	FUS	intra-protein xl	362	370	0.59	34.91	0	Pellet	3	Centrifuge 2 (comparative experiment for Lactalbumin)
FUS:432:x:FUS:515	APKPDGPGGGPGGSHMGGNYGDDR-AAIDWFDGKEFSGNPIK-a3-b9	FUS	FUS	intra-protein xl	456	362	0	30.58	0.032	Pellet	2	Centrifuge 2 (comparative experiment for Lactalbumin)
FUS:453:x:FUS:515	AAIDWFDGKEFSGNPIK-GGFGPGKMDSR-a9-b7	FUS	FUS	intra-protein xl	362	515	0.41	48.03	0	Pellet	3	Centrifuge 2 (comparative experiment for Lactalbumin)
FUS:456:x:FUS:515	EFSGNPIKVSFATR-GGFGPGKMDSR-a8-b7	FUS	FUS	intra-protein xl	370	515	0	33.37	0	Pellet	3	Centrifuge 2 (comparative experiment for Lactalbumin)
HspB8:111:x:HspB8:120	APKPDGPGGGPGGSHMGGNYGDDR-AGDWKCPNPTCENMNFSWR-a3-b5	FUS	FUS	intra-protein xl	456	432	0	46.51	0	Pellet	2	Centrifuge 2 (comparative experiment for Lactalbumin)
HspB8:111:x:HspB8:129	AGDWKCPNPTCENMNFSWR-GGFGPGKMDSR-a5-b7	FUS	FUS	intra-protein xl	432	515	0.44	42.71	0	Pellet	2	Centrifuge 2 (comparative experiment for Lactalbumin)
HspB8:111:x:HspB8:133	APKPDGPGGGPGGSHMGGNYGDDR-GGFGPGKMDSR-a3-b7	FUS	FUS	intra-protein xl	456	515	0.45	34.25	0	Pellet	3	Centrifuge 2 (comparative experiment for Lactalbumin)
HspB8:118:x:HspB8:129	VCVNVHSFKPEELMVK-TKDGYVEVSGK-a9-b2	HspB8	HspB8	intra-protein xl	111	120	0.74	30.21	0.032	Pellet	2	Centrifuge 2 (comparative experiment for Lactalbumin)
HspB8:118:x:HspB8:133	VCVNVHSFKPEELMVK-DGYVEVSGKHEEK-a9-b9	HspB8	HspB8	intra-protein xl	111	129	0	33.47	0	Pellet	3	Centrifuge 2 (comparative experiment for Lactalbumin)
HspB8:120:x:HspB8:129	VCVNVHSFKPEELMVKTK-DGYVEVSGKHEEK-a16-b9	HspB8	HspB8	intra-protein xl	118	129	0.57	39.14	0	Pellet	3	Centrifuge 2 (comparative experiment for Lactalbumin)
HspB8:120:x:HspB8:133	DGYVEVSGKHEEK-TKDGYVEVSGK-a9-b2	HspB8	HspB8	intra-protein xl	129	120	0.6	42.46	0	Pellet	3	Centrifuge 2 (comparative experiment for Lactalbumin)
HspB8:129:x:HspB8:129	HEEKQQEGGIVSK-TKDGYVEVSGK-a4-b2	HspB8	HspB8	intra-protein xl	133	120	0.5	31.28	0.032	Pellet	3	Centrifuge 2 (comparative experiment for Lactalbumin)
HspB8:129:x:HspB8:142	TKDGYVEVSGKHEEK-TKDGYVEVSGKHEEK-a11-b11	HspB8	HspB8	intra-protein xl	129	129	0.72	36.3	0	Pellet	3	Centrifuge 2 (comparative experiment for Lactalbumin)
FUS:311	TKDGYVEVSGKHEEK-QQEGGIVSKNFTK-a11-b9	HspB8	HspB8	intra-protein xl	129	142	0.66	25.1	0.081	Pellet	2	Centrifuge 2 (comparative experiment for Lactalbumin)
FUS:321	KTGQPMINLYTDR-GGFNKFGGPR-a1-b5	FUS	FUS	intra-protein xl	321	269	0	34.76	0	Supernatant	3	Centrifuge 2 (comparative experiment for Lactalbumin)
FUS:337	LKGEATVSFDDPPSAK-GGFNKFGGPR-a2-b5	FUS	FUS	intra-protein xl	339	269	0.35	33.9	0	Supernatant	3	Centrifuge 2 (comparative experiment for Lactalbumin)
FUS:339	AAIDWFDGKEFSGNPIK-GGFNKFGGPR-a9-b5	FUS	FUS	intra-protein xl	362	269	0	40.98	0	Supernatant	3	Centrifuge 2 (comparative experiment for Lactalbumin)
FUS:353	AGDWKCPNPTCENMNFSWR-GGFNKFGGPR-a5-b5	FUS	FUS	intra-protein xl	432	269	0	42.01	0	Supernatant	3	Centrifuge 2 (comparative experiment for Lactalbumin)
FUS:362	NECNQCKAPKPDGPGGGPGGSHMGGNYGDDR-GGFNKFGGPR-a7-b5	FUS	FUS	intra-protein xl	453	269	0.51	43.49	0	Supernatant	2	Centrifuge 2 (comparative experiment for Lactalbumin)
FUS:370	APKPDGPGGGPGGSHMGGNYGDDR-GGFNKFGGPR-a3-b5	FUS	FUS	intra-protein xl	456	269	0	31.84	0	Supernatant	3	Centrifuge 2 (comparative experiment for Lactalbumin)
FUS:432	KTGQPMINLYTDR-QIGIIKTNK-a1-b6	FUS	FUS	intra-protein xl	321	317	0.84	36.07	0	Supernatant	3	Centrifuge 2 (comparative experiment for Lactalbumin)
FUS:453	AAIDWFDGKEFSGNPIK-QIGIIKTNK-a9-b6	FUS	FUS	intra-protein xl	362	317	0.52	27.44	0.024	Supernatant	3	Centrifuge 2 (comparative experiment for Lactalbumin)
FUS:456	AGDWKCPNPTCENMNFSWR-KTGQPMINLYTDR-a5-b1	FUS	FUS	intra-protein xl	432	321	0.6	39.6	0	Supernatant	3	Centrifuge 2 (comparative experiment for Lactalbumin)
HspB8:102	NECNQCKAPKPDGPGGGPGGSHMGGNYGDDR-KTGQPMINLYTDR-a7-b1	FUS	FUS	intra-protein xl	453	321	0.92	26.95	0.043	Supernatant	2	Centrifuge 2 (comparative experiment for Lactalbumin)
HspB8:111	APKPDGPGGGPGGSHMGGNYGDDR-KTGQPMINLYTDR-a3-b1	FUS	FUS	intra-protein xl	456	321	0	27.74	0.024	Supernatant	3	Centrifuge 2 (comparative experiment for Lactalbumin)
HspB8:118	EFSGNPIKVSFATR-ETGKLK-a8-b4	FUS	FUS	intra-protein xl	370	337	0.24	30.5	0.025	Supernatant	3	Centrifuge 2 (comparative experiment for Lactalbumin)
HspB8:120	AAIDWFDGKEFSGNPIK-LKGEATVSFDDPPSAK-a9-b2	FUS	FUS	intra-protein xl	362	339	0	38.79	0	Supernatant	3	Centrifuge 2 (comparative experiment for Lactalbumin)
HspB8:129	LKGEATVSFDDPPSAK-EFSGNPIKVSFATR-a2-b8	FUS	FUS	intra-protein xl	339	370	0.18	30.61	0.025	Supernatant	3	Centrifuge 2 (comparative experiment for Lactalbumin)
HspB8:133	AGDWKCPNPTCENMNFSWR-LKGEATVSFDDPPSAK-a5-b2	FUS	FUS	intra-protein xl	432	339	0.4	37.52	0	Supernatant	3	Centrifuge 2 (comparative experiment for Lactalbumin)
HspB8:142	NECNQCKAPKPDGPGGGPGGSHMGGNYGDDR-LKGEATVSFDDPPSAK-a7-b2	FUS	FUS	intra-protein xl	453	339	0.92	38.01	0	Supernatant	3	Centrifuge 2 (comparative experiment for Lactalbumin)
FUS:311	APKPDGPGGGPGGSHMGGNYGDDR-LKGEATVSFDDPPSAK-a3-b2	FUS	FUS	intra-protein xl	456	339	0.32	30.43	0	Supernatant	3	Centrifuge 2 (comparative experiment for Lactalbumin)
FUS:321	LKGEATVSFDDPPSAK-GGFGPGKMDSR-a2-b7	FUS	FUS	intra-protein xl	339	515	0.4	43.89	0	Supernatant	3	Centrifuge 2 (comparative experiment for Lactalbumin)
FUS:337	AGDWKCPNPTCENMNFSWR-AAIDWFDGKEFSGNPIK-a5-b9	FUS	FUS	intra-protein xl	432	362	0	29.4	0.025	Supernatant	2	Centrifuge 2 (comparative experiment for Lactalbumin)
FUS:339	NECNQCKAPKPDGPGGGPGGSHMGGNYGDDR-AAIDWFDGKEFSGNPIK-a7-b9	FUS	FUS	intra-protein xl	453	362	0.93	30.06	0	Supernatant	2	Centrifuge 2 (comparative experiment for Lactalbumin)
FUS:353	APKPDGPGGGPGGSHMGGNYGDDR-AAIDWFDGKEFSGNPIK-a3-b9	FUS	FUS	intra-protein xl	456	362	0.58	32.04	0	Supernatant	3	Centrifuge 2 (comparative experiment for Lactalbumin)
FUS:362	AAIDWFDGKEFSGNPIK-GGFGPGKMDSR-a9-b7	FUS	FUS	intra-protein xl	362	515	0.46	46.86	0	Supernatant	3	Centrifuge 2 (comparative experiment for Lactalbumin)
FUS:370	AGDWKCPNPTCENMNFSWR-EFSGNPIKVSFATR-a5-b8	FUS	FUS	intra-protein xl	432	370	0	34.15	0	Supernatant	3	Centrifuge 2 (comparative experiment for Lactalbumin)
FUS:432	NECNQCKAPKPDGPGGGPGGSHMGGNYGDDR-EFSGNPIKVSFATR-a7-b8	FUS	FUS	intra-protein xl	453	370	0.79	26.9	0.043	Supernatant	3	Centrifuge 2 (comparative experiment for Lactalbumin)
FUS:453	APKPDGPGGGPGGSHMGGNYGDDR-EFSGNPIKVSFATR-a3-b8	FUS	FUS	intra-protein xl	456	370	0	24.14	0.043	Supernatant	3	Centrifuge 2 (comparative experiment for Lactalbumin)
FUS:456	EFSGNPIKVSFATR-GGFGPGKMDSR-a8-b7	FUS	FUS	intra-protein xl	370	515	0	30.97	0	Supernatant	3	Centrifuge 2 (comparative experiment for Lactalbumin)
HspB8:102	NECNQCKAPKPDGPGGGPGGSHMGGNYGDDR-AGDWKCPNPTCENMNFSWR-a7-b5	FUS	FUS	intra-protein xl	453	432	0.79	44.5	0	Supernatant	3	Centrifuge 2 (comparative experiment for Lactalbumin)
HspB8:111	APKPDGPGGGPGGSHMGGNYGDDR-AGDWKCPNPTCENMNFSWR-a3-b5	FUS	FUS	intra-protein xl	456	432	0	42.54	0	Supernatant	3	Centrifuge 2 (comparative experiment for Lactalbumin)
HspB8:118	AGDWKCPNPTCENMNFSWR-GGFGPGKMDSR-a5-b7	FUS	FUS	intra-protein xl	432	515	0	42.7	0	Supernatant	3	Centrifuge 2 (comparative experiment for Lactalbumin)
HspB8:120	NECNQCKAPKPDGPGGGPGGSHMGGNYGDDR-GGFGPGKMDSR-a7-b7	FUS	FUS	intra-protein xl	453	515	0.66	39	0	Supernatant	3	Centrifuge 2 (comparative experiment for Lactalbumin)
HspB8:129	APKPDGPGGGPGGSHMGGNYGDDR-GGFGPGKMDSR-a3-b7	FUS	FUS	intra-protein xl	456	515	0	36.85	0	Supernatant	3	Centrifuge 2 (comparative experiment for Lactalbumin)
HspB8:133	VCVNVHSFKPEELMVK-TKDGYVEVSGK-a9-b2	HspB8	HspB8	intra-protein xl	111	120	0.67	33.68	0	Supernatant	2	Centrifuge 2 (comparative experiment for Lactalbumin)
HspB8:142	VCVNVHSFKPEELMVK-TKDGYVEVSGKHEEK-a9-b11	HspB8	HspB8	intra-protein xl	111	129	0.74	41.19	0	Supernatant	3	Centrifuge 2 (comparative experiment for Lactalbumin)
FUS:269:x:HspB8:129	VCVNVHSFKPEELMVK-HEEKQQEGGIVSK-a9-b4	HspB8	HspB8	intra-protein xl	111	133	0.51	47.36	0	Supernatant	3	Centrifuge 2 (comparative experiment for Lactalbumin)
FUS:317:x:HspB8:120	VCVNVHSFKPEELMVKTK-DGYVEVSGKHEEK-a16-b9	HspB8	HspB8	intra-protein xl	118	129	0.54	41.14	0	Supernatant	3	Centrifuge 2 (comparative experiment for Lactalbumin)
FUS:321:x:HspB8:120	DGYVEVSGKHEEKQQEGGIVSK-VCVNVHSFKPEELMVKTK-a13-b16	HspB8	HspB8	intra-protein xl	133	118	0.7	30.35	0	Supernatant	2	Centrifuge 2 (comparative experiment for Lactalbumin)
FUS:321:x:HspB8:129	DGYVEVSGKHEEK-TKDGYVEVSGK-a9-b2	HspB8	HspB8	intra-protein xl	129	120	0.73	43.86	0	Supernatant	3	Centrifuge 2 (comparative experiment for Lactalbumin)
FUS:321:x:HspB8:133	HEEKQQEGGIVSK-TKDGYVEVSGK-a4-b2	HspB8	HspB8	intra-protein xl	133	120	0.45	31.42	0	Supernatant	3	Centrifuge 2 (comparative experiment for Lactalbumin)
FUS:337:x:HspB8:111	TKDGYVEVSGKHEEK-TKDGYVEVSGKHEEK-a11-b11	HspB8	HspB8	intra-protein xl	129	129	0.78	37.96	0	Supernatant	3	Centrifuge 2 (comparative experiment for Lactalbumin)
FUS:337:x:HspB8:118	DGYVEVSGKHEEK-QQEGGIVSKNFTK-a9-b9	HspB8	HspB8	intra-protein xl	129	142	0.75	26.15	0.043	Supernatant	3	Centrifuge 2 (comparative experiment for Lactalbumin)
FUS:337:x:HspB8:120	GGFNKFGGPR-QIGIIKTNK-a5-b6	FUS	FUS	intra-protein xl	269	317	0.67	26.15	0	Pellet	3	Centrifuge 3
FUS:337:x:HspB8:129	KTGQPMINLYTDR-GGFNKFGGPR-a1-b5	FUS	FUS	intra-protein xl	321	269	0	38.71	0	Pellet	3	Centrifuge 3
FUS:337:x:HspB8:133	GGFNKFGGPR-ETGKLK-a5-b4	FUS	FUS	intra-protein xl	269	337	0	35.52	0	Pellet	3	Centrifuge 3
FUS:339:x:HspB8:111	LKGEATVSFDDPPSAK-GGFNKFGGPR-a2-b5	FUS	FUS	intra-protein xl	339	269	0.37	45.3	0	Pellet	3	Centrifuge 3
FUS:339:x:HspB8:120	AAIDWFDGKEFSGNPIK-GGFNKFGGPR-a9-b5	FUS	FUS	intra-protein xl	362	269	0.25	34.72	0	Pellet	3	Centrifuge 3
FUS:339:x:HspB8:133	EFSGNPIKVSFATR-GGFNKFGGPR-a8-b5	FUS	FUS	intra-protein xl	370	269	0	37.73	0	Pellet	3	Centrifuge 3
FUS:362:x:HspB8:120	AGDWKCPNPTCENMNFSWR-GGFNKFGGPR-a5-b5	FUS	FUS	intra-protein xl	432	269	0	42.93	0	Pellet	3	Centrifuge 3
FUS:362:x:HspB8:129	APKPDGPGGGPGGSHMGGNYGDDR-GGFNKFGGPR-a3-b5	FUS	FUS	intra-protein xl	456	269	0	39.44	0	Pellet	3	Centrifuge 3
FUS:370:x:HspB8:111	GGFGPGKMDSR-GGFNKFGGPR-a7-b5	FUS	FUS	intra-protein xl	515	269	0.63	46.4	0	Pellet	3	Centrifuge 3
FUS:370:x:HspB8:118	KTGQPMINLYTDR-QIGIIKTNK-a1-b6	FUS	FUS	intra-protein xl	321	317	0	34.76	0	Pellet	3	Centrifuge 3
FUS:370:x:HspB8:120	QIGIIKTNK-ETGKLK-a6-b4	FUS	FUS	intra-protein xl	317	337	0.55	31.33	0	Pellet	3	Centrifuge 3
FUS:370:x:HspB8:129	LKGEATVSFDDPPSAK-QIGIIKTNK-a2-b6	FUS	FUS	intra-protein xl	339	317	0.94	32.29	0	Pellet	2	Centrifuge 3
FUS:370:x:HspB8:133	AAIDWFDGKEFSGNPIK-QIGIIKTNK-a9-b6	FUS	FUS	intra-protein xl	362	317	0.87	33.91	0	Pellet	3	Centrifuge 3
FUS:432:x:HspB8:120	EFSGNPIKVSFATR-QIGIIKTNK-a8-b6	FUS	FUS	intra-protein xl	370	317	0.78	29.03	0.017	Pellet	2	Centrifuge 3
FUS:456:x:HspB8:111	GGFGPGKMDSR-QIGIIKTNK-a7-b6	FUS	FUS	intra-protein xl	515	317	0.57	32.63	0	Pellet	2	Centrifuge 3
FUS:456:x:HspB8:120	KTGQPMINLYTDR-ETGKLK-a1-b4	FUS	FUS	intra-protein xl	321	337	0	33.84	0	Pellet	3	Centrifuge 3
FUS:456:x:HspB8:129	LKGEATVSFDDPPSAK-KTGQPMINLYTDR-a2-b1	FUS	FUS	intra-protein xl	339	321	0.6	38.63	0	Pellet	3	Centrifuge 3
FUS:515:x:HspB8:102	AAIDWFDGKEFSGNPIK-KTGQPMINLYTDR-a9-b1	FUS	FUS	intra-protein xl	362	321	0.64	36.81	0	Pellet	3	Centrifuge 3
FUS:515:x:HspB8:111	EFSGNPIKVSFATR-KTGQPMINLYTDR-a8-b1	FUS	FUS	intra-protein xl	370	321	0	38.51	0	Pellet	3	Centrifuge 3
FUS:515:x:HspB8:118	AGDWKCPNPTCENMNFSWR-KTGQPMINLYTDR-a5-b1	FUS	FUS	intra-protein xl	432	321	0	36.48	0	Pellet	2	Centrifuge 3
FUS:515:x:HspB8:120	APKPDGPGGGPGGSHMGGNYGDDR-KTGQPMINLYTDR-a3-b1	FUS	FUS	intra-protein xl	456	321	0	31.82	0	Pellet	3	Centrifuge 3
FUS:515:x:HspB8:129	KTGQPMINLYTDR-GGFGPGKMDSR-a1-b7	FUS	FUS	intra-protein xl	321	515	0	39.47	0	Pellet	3	Centrifuge 3
FUS:515:x:HspB8:133	LKGEATVSFDDPPSAK-ETGKLK-a2-b4	FUS	FUS	intra-protein xl	339	337	0.41	28.32	0	Pellet	3	Centrifuge 3
FUS:337:x:HspB8:120	AAIDWFDGKEFSGNPIK-ETGKLK-a9-b4	FUS	FUS	intra-protein xl	362	337	0.25	30.72	0	Pellet	3	Centrifuge 3
FUS:339:x:HspB8:120	EFSGNPIKVSFATR-ETGKLK-a8-b4	FUS	FUS	intra-protein xl	370	337	0.24	32.32	0	Pellet	3	Centrifuge 3
FUS:370:x:HspB8:118	AGDWKCPNPTCENMNFSWR-ETGKLK-a5-b4	FUS	FUS	intra-protein xl	432	337	0	36.39	0	Pellet	3	Centrifuge 3
FUS:432:x:HspB8:120	NECNQCKAPKPDGPGGGPGGSHMGGNYGDDR-ETGKLK-a7-b4	FUS	FUS	intra-protein xl	453	337	0.47	26.86	0	Pellet	3	Centrifuge 3
FUS:515:x:HspB8:111	GGFGPGKMDSR-ETGKLK-a7-b4	FUS	FUS	intra-protein xl	515	337	0.77	31.61	0	Pellet	3	Centrifuge 3
FUS:515:x:HspB8:129	AAIDWFDGKEFSGNPIK-LKGEATVSFDDPPSAK-a9-b2	FUS	FUS	intra-protein xl	362	339	0.54	46.16	0	Pellet	3	Centrifuge 3
FUS:311:x:FUS:317	LKGEATVSFDDPPSAK-EFSGNPIKVSFATR-a2-b8	FUS	FUS	intra-protein xl	339	370	0.14	34.64	0	Pellet	3	Centrifuge 3
FUS:320:x:FUS:321	AGDWKCPNPTCENMNFSWR-LKGEATVSFDDPPSAK-a5-b2	FUS	FUS	intra-protein xl	432	339	0.52	38	0	Pellet	3	Centrifuge 3
FUS:337:x:FUS:339	APKPDGPGGGPGGSHMGGNYGDDR-LKGEATVSFDDPPSAK-a3-b2	FUS	FUS	intra-protein xl	456	339	0	31.47	0	Pellet	3	Centrifuge 3
FUS:339:x:FUS:353	LKGEATVSFDDPPSAK-GGFGPGKMDSR-a2-b7	FUS	FUS	intra-protein xl	339	515	0.35	43.38	0	Pellet	3	Centrifuge 3
FUS:353:x:FUS:362	GEATVSFDDPPSAKAAIDWFDGK-EFSGNPIKVSFATR-a14-b8	FUS	FUS	intra-protein xl	353	370	0.49	25.53	0	Pellet	2	Centrifuge 3
FUS:362:x:FUS:370	AAIDWFDGKEFSGNPIK-AAIDWFDGKEFSGNPIK-a9-b9	FUS	FUS	intra-protein xl	362	362	0	44.05	0	Pellet	2	Centrifuge 3
FUS:453:x:FUS:456	AAIDWFDGKEFSGNPIK-EFSGNPIKVSFATR-a9-b8	FUS	FUS	intra-protein xl	362	370	0.61	29.07	0	Pellet	3	Centrifuge 3
HspB8:102:x:HspB8:111	AGDWKCPNPTCENMNFSWR-AAIDWFDGKEFSGNPIK-a5-b9	FUS	FUS	intra-protein xl	432	362	0	45.53	0	Pellet	3	Centrifuge 3
HspB8:111:x:HspB8:118	AAIDWFDGKEFSGNPIK-GGFGPGKMDSR-a9-b7	FUS	FUS	intra-protein xl	362	515	0.49	50.09	0	Pellet	3	Centrifuge 3
HspB8:111:x:HspB8:120	EFSGNPIKVSFATR-EFSGNPIKVSFATR-a8-b8	FUS	FUS	intra-protein xl	370	370	0	31.57	0	Pellet	3	Centrifuge 3
HspB8:118:x:HspB8:120	AGDWKCPNPTCENMNFSWR-EFSGNPIKVSFATR-a5-b8	FUS	FUS	intra-protein xl	432	370	0	37.4	0	Pellet	3	Centrifuge 3
HspB8:120:x:HspB8:129	NECNQCKAPKPDGPGGGPGGSHMGGNYGDDR-EFSGNPIKVSFATR-a7-b8	FUS	FUS	intra-protein xl	453	370	0.7	31.78	0	Pellet	3	Centrifuge 3
HspB8:129:x:HspB8:133	APKPDGPGGGPGGSHMGGNYGDDR-EFSGNPIKVSFATR-a3-b8	FUS	FUS	intra-protein xl	456	370	0.23	35.95	0	Pellet	3	Centrifuge 3
HspB8:133:x:HspB8:142	EFSGNPIKVSFATR-GGFGPGKMDSR-a8-b7	FUS	FUS	intra-protein xl	370	515	0	36.35	0	Pellet	3	Centrifuge 3
HspB8:142:x:HspB8:146	NECNQCKAPKPDGPGGGPGGSHMGGNYGDDR-AGDWKCPNPTCENMNFSWR-a7-b5	FUS	FUS	intra-protein xl	453	432	0.72	38.12	0	Pellet	2	Centrifuge 3
HspB8:142:x:HspB8:147	APKPDGPGGGPGGSHMGGNYGDDR-AGDWKCPNPTCENMNFSWR-a3-b5	FUS	FUS	intra-protein xl	456	432	0.5	40.76	0	Pellet	3	Centrifuge 3
FUS:311:x:FUS:317	AGDWKCPNPTCENMNFSWR-GGFGPGKMDSR-a5-b7	FUS	FUS	intra-protein xl	432	515	0	46.19	0	Pellet	3	Centrifuge 3
FUS:320:x:FUS:321	NECNQCKAPKPDGPGGGPGGSHMGGNYGDDR-GGFGPGKMDSR-a7-b7	FUS	FUS	intra-protein xl	453	515	0.67	37.95	0	Pellet	3	Centrifuge 3
FUS:337:x:FUS:339	APKPDGPGGGPGGSHMGGNYGDDR-GGFGPGKMDSR-a3-b7	FUS	FUS	intra-protein xl	456	515	0	33.43	0	Pellet	3	Centrifuge 3
FUS:353:x:FUS:362	GGFGPGKMDSR-GGFGPGKMDSR-a7-b7	FUS	FUS	intra-protein xl	515	515	0	37.89	0	Pellet	3	Centrifuge 3
FUS:362:x:FUS:370	TPPPFPGEPWKVCVNVHSFKPEELMVK-TKDGYVEVSGK-a11-b2	HspB8	HspB8	intra-protein xl	102	120	0	29.99	0	Pellet	2	Centrifuge 3
FUS:453:x:FUS:456	VCVNVHSFKPEELMVK-TKDGYVEVSGK-a9-b2	HspB8	HspB8	intra-protein xl	111	120	0.66	44.8	0	Pellet	3	Centrifuge 3
HspB8:111:x:HspB8:118	VCVNVHSFKPEELMVK-DGYVEVSGKHEEK-a9-b9	HspB8	HspB8	intra-protein xl	111	129	0.67	40.07	0	Pellet	3	Centrifuge 3
HspB8:111:x:HspB8:120	VCVNVHSFKPEELMVK-HEEKQQEGGIVSK-a9-b4	HspB8	HspB8	intra-protein xl	111	133	0.76	38.67	0	Pellet	3	Centrifuge 3
HspB8:118:x:HspB8:120	VCVNVHSFKPEELMVKTK-DGYVEVSGKHEEK-a16-b9	HspB8	HspB8	intra-protein xl	118	129	0.5	40.1	0	Pellet	3	Centrifuge 3
HspB8:120:x:HspB8:129	TKDGYVEVSGK-TKDGYVEVSGK-a2-b2	HspB8	HspB8	intra-protein xl	120	120	0.73	32.44	0	Pellet	3	Centrifuge 3
HspB8:129:x:HspB8:133	DGYVEVSGKHEEK-TKDGYVEVSGK-a9-b2	HspB8	HspB8	intra-protein xl	129	120	0.79	44.98	0	Pellet	3	Centrifuge 3
HspB8:133:x:HspB8:142	HEEKQQEGGIVSK-TKDGYVEVSGK-a4-b2	HspB8	HspB8	intra-protein xl	133	120	0.63	48.16	0	Pellet	3	Centrifuge 3
HspB8:142:x:HspB8:146	DGYVEVSGKHEEK-DGYVEVSGKHEEK-a9-b9	HspB8	HspB8	intra-protein xl	129	129	0.67	38.3	0	Pellet	3	Centrifuge 3
HspB8:142:x:HspB8:147	DGYVEVSGKHEEK-QQEGGIVSKNFTK-a9-b9	HspB8	HspB8	intra-protein xl	129	142	0.83	25.43	0	Pellet	3	Centrifuge 3
FUS:269:x:FUS:317	GGFNKFGGPR-QIGIIKTNK-a5-b6	FUS	FUS	intra-protein xl	269	317	0.65	32.23	0	Supernatant	3	Centrifuge 3
FUS:269:x:FUS:321	KTGQPMINLYTDR-GGFNKFGGPR-a1-b5	FUS	FUS	intra-protein xl	321	269	0	38.56	0	Supernatant	3	Centrifuge 3
FUS:269:x:FUS:337	GGFNKFGGPR-ETGKLK-a5-b4	FUS	FUS	intra-protein xl	269	337	0	34.09	0	Supernatant	3	Centrifuge 3
FUS:269:x:FUS:339	LKGEATVSFDDPPSAK-GGFNKFGGPR-a2-b5	FUS	FUS	intra-protein xl	339	269	0.47	45.36	0	Supernatant	3	Centrifuge 3
FUS:269:x:FUS:362	AAIDWFDGKEFSGNPIK-GGFNKFGGPR-a9-b5	FUS	FUS	intra-protein xl	362	269	0.3	39.83	0	Supernatant	3	Centrifuge 3
FUS:269:x:FUS:370	EFSGNPIKVSFATR-GGFNKFGGPR-a8-b5	FUS	FUS	intra-protein xl	370	269	0	37.24	0	Supernatant	3	Centrifuge 3
FUS:269:x:FUS:432	AGDWKCPNPTCENMNFSWR-GGFNKFGGPR-a5-b5	FUS	FUS	intra-protein xl	432	269	0	41.52	0	Supernatant	3	Centrifuge 3
FUS:269:x:FUS:456	NECNQCKAPKPDGPGGGPGGSHMGGNYGDDR-GGFNKFGGPR-a7-b5	FUS	FUS	intra-protein xl	453	269	0.62	29.55	0	Supernatant	2	Centrifuge 3
FUS:269:x:FUS:515	APKPDGPGGGPGGSHMGGNYGDDR-GGFNKFGGPR-a3-b5	FUS	FUS	intra-protein xl	456	269	0	33.98	0	Supernatant	3	Centrifuge 3
FUS:317:x:FUS:321	KTGQPMINLYTDR-QIGIIKTNK-a1-b6	FUS	FUS	intra-protein xl	321	317	0.78	36.82	0	Supernatant	3	Centrifuge 3
FUS:317:x:FUS:337	LKGEATVSFDDPPSAK-QIGIIKTNK-a2-b6	FUS	FUS	intra-protein xl	339	317	0.91	29.46	0.023	Supernatant	2	Centrifuge 3
FUS:317:x:FUS:339	AGDWKCPNPTCENMNFSWR-QIGIIKTNK-a5-b6	FUS	FUS	intra-protein xl	432	317	0.29	27.11	0	Supernatant	3	Centrifuge 3
FUS:317:x:FUS:362	AGDWKCPNPTCENMNFSWR-KTGQPMINLYTDR-a5-b1	FUS	FUS	intra-protein xl	432	321	0	37.13	0	Supernatant	3	Centrifuge 3
FUS:317:x:FUS:370	AAIDWFDGKEFSGNPIK-ETGKLK-a9-b4	FUS	FUS	intra-protein xl	362	337	0.37	26.31	0.023	Supernatant	3	Centrifuge 3
FUS:317:x:FUS:515	EFSGNPIKVSFATR-ETGKLK-a8-b4	FUS	FUS	intra-protein xl	370	337	0.28	34.64	0	Supernatant	3	Centrifuge 3
FUS:321:x:FUS:337	AGDWKCPNPTCENMNFSWR-ETGKLK-a5-b4	FUS	FUS	intra-protein xl	432	337	0.18	29.85	0	Supernatant	2	Centrifuge 3
FUS:321:x:FUS:339	NECNQCKAPKPDGPGGGPGGSHMGGNYGDDR-ETGKLK-a7-b4	FUS	FUS	intra-protein xl	453	337	0.61	25.09	0.045	Supernatant	2	Centrifuge 3
FUS:321:x:FUS:362	GGFGPGKMDSR-ETGKLK-a7-b4	FUS	FUS	intra-protein xl	515	337	0.73	33.44	0	Supernatant	3	Centrifuge 3
FUS:321:x:FUS:370	AAIDWFDGKEFSGNPIK-LKGEATVSFDDPPSAK-a9-b2	FUS	FUS	intra-protein xl	362	339	0.56	43.07	0	Supernatant	3	Centrifuge 3
FUS:321:x:FUS:432	LKGEATVSFDDPPSAK-EFSGNPIKVSFATR-a2-b8	FUS	FUS	intra-protein xl	339	370	0.09	38.16	0	Supernatant	3	Centrifuge 3
FUS:321:x:FUS:456	AGDWKCPNPTCENMNFSWR-LKGEATVSFDDPPSAK-a5-b2	FUS	FUS	intra-protein xl	432	339	0.43	41.83	0	Supernatant	3	Centrifuge 3
FUS:321:x:FUS:515	APKPDGPGGGPGGSHMGGNYGDDR-LKGEATVSFDDPPSAK-a3-b2	FUS	FUS	intra-protein xl	456	339	0.42	31.68	0	Supernatant	3	Centrifuge 3
FUS:337:x:FUS:339	LKGEATVSFDDPPSAK-GGFGPGKMDSR-a2-b7	FUS	FUS	intra-protein xl	339	515	0.32	40.96	0	Supernatant	3	Centrifuge 3
FUS:337:x:FUS:362	AGDWKCPNPTCENMNFSWR-AAIDWFDGKEFSGNPIK-a5-b9	FUS	FUS	intra-protein xl	432	362	0	48.72	0	Supernatant	3	Centrifuge 3
FUS:337:x:FUS:370	AAIDWFDGKEFSGNPIK-GGFGPGKMDSR-a9-b7	FUS	FUS	intra-protein xl	362	515	0	44.48	0	Supernatant	3	Centrifuge 3
FUS:337:x:FUS:432	AGDWKCPNPTCENMNFSWR-EFSGNPIKVSFATR-a5-b8	FUS	FUS	intra-protein xl	432	370	0	38.91	0	Supernatant	3	Centrifuge 3
FUS:337:x:FUS:453	NECNQCKAPKPDGPGGGPGGSHMGGNYGDDR-EFSGNPIKVSFATR-a7-b8	FUS	FUS	intra-protein xl	453	370	0	29.35	0.023	Supernatant	3	Centrifuge 3
FUS:337:x:FUS:515	EFSGNPIKVSFATR-GGFGPGKMDSR-a8-b7	FUS	FUS	intra-protein xl	370	515	0	34.25	0	Supernatant	3	Centrifuge 3
FUS:339:x:FUS:362	NECNQCKAPKPDGPGGGPGGSHMGGNYGDDR-AGDWKCPNPTCENMNFSWR-a7-b5	FUS	FUS	intra-protein xl	453	432	0.34	47.18	0	Supernatant	3	Centrifuge 3
FUS:339:x:FUS:370	APKPDGPGGGPGGSHMGGNYGDDR-AGDWKCPNPTCENMNFSWR-a3-b5	FUS	FUS	intra-protein xl	456	432	0	40.16	0	Supernatant	3	Centrifuge 3
FUS:339:x:FUS:432	AGDWKCPNPTCENMNFSWR-GGFGPGKMDSR-a5-b7	FUS	FUS	intra-protein xl	432	515	0.44	50.15	0	Supernatant	3	Centrifuge 3
FUS:339:x:FUS:456	NECNQCKAPKPDGPGGGPGGSHMGGNYGDDR-GGFGPGKMDSR-a7-b7	FUS	FUS	intra-protein xl	453	515	0.71	40.94	0	Supernatant	3	Centrifuge 3
FUS:339:x:FUS:515	APKPDGPGGGPGGSHMGGNYGDDR-GGFGPGKMDSR-a3-b7	FUS	FUS	intra-protein xl	456	515	0.48	36.81	0	Supernatant	3	Centrifuge 3
FUS:353:x:FUS:370	ZGPLGSMADGQMPFSCHYPSR-TKDGYVEVSGK-a1-b2	HspB8	HspB8	intra-protein xl	1	120	0	27.32	0.045	Supernatant	2	Centrifuge 3
FUS:362:x:FUS:362	VCVNVHSFKPEELMVK-TKDGYVEVSGK-a9-b2	HspB8	HspB8	intra-protein xl	111	120	0.92	40.51	0	Supernatant	3	Centrifuge 3
FUS:362:x:FUS:370	VCVNVHSFKPEELMVK-DGYVEVSGKHEEK-a9-b9	HspB8	HspB8	intra-protein xl	111	129	0.69	44.65	0	Supernatant	3	Centrifuge 3
FUS:362:x:FUS:432	VCVNVHSFKPEELMVK-HEEKQQEGGIVSK-a9-b4	HspB8	HspB8	intra-protein xl	111	133	0.75	40.85	0	Supernatant	3	Centrifuge 3
FUS:362:x:FUS:515	VCVNVHSFKPEELMVKTK-DGYVEVSGKHEEK-a16-b9	HspB8	HspB8	intra-protein xl	118	129	0.66	39.56	0	Supernatant	3	Centrifuge 3
FUS:370:x:FUS:370	DGYVEVSGKHEEK-TKDGYVEVSGK-a9-b2	HspB8	HspB8	intra-protein xl	129	120	0.64	46.92	0	Supernatant	3	Centrifuge 3
FUS:370:x:FUS:432	HEEKQQEGGIVSK-TKDGYVEVSGK-a4-b2	HspB8	HspB8	intra-protein xl	133	120	0.6	47.21	0	Supernatant	3	Centrifuge 3
FUS:370:x:FUS:453	DGYVEVSGKHEEK-DGYVEVSGKHEEK-a9-b9	HspB8	HspB8	intra-protein xl	129	129	0	38.2	0	Supernatant	3	Centrifuge 3
FUS:370:x:FUS:456	DGYVEVSGKHEEK-QQEGGIVSKNFTK-a9-b9	HspB8	HspB8	intra-protein xl	129	142	0.75	29.51	0.023	Supernatant	3	Centrifuge 3
FUS:370:x:FUS:515	LKGEATVSFDDPPSAK-K2-156	FUS	-	monolink	339		0.14	39.89	0	Pellet	3	Centrifuge 1
FUS:432:x:FUS:453	GEATVSFDDPPSAKAAIDWFDGK-K14-156	FUS	-	monolink	353		0.22	28.94	0	Pellet	3	Centrifuge 1
FUS:432:x:FUS:456	AAIDWFDGKEFSGNPIK-K9-156	FUS	-	monolink	362		0.15	47.29	0	Pellet	3	Centrifuge 1
FUS:432:x:FUS:515	EFSGNPIKVSFATR-K8-156	FUS	-	monolink	370		0	46.31	0	Pellet	3	Centrifuge 1
FUS:453:x:FUS:515	AGDWKCPNPTCENMNFSWR-K5-156	FUS	-	monolink	432		0.05	27.84	0	Pellet	2	Centrifuge 1
FUS:456:x:FUS:515	NECNQCKAPKPDGPGGGPGGSHMGGNYGDDR-K7-155	FUS	-	monolink	453		0.04	39.17	0	Pellet	3	Centrifuge 1
FUS:515:x:FUS:515	APKPDGPGGGPGGSHMGGNYGDDRR-K3-155	FUS	-	monolink	456		0	39.26	0	Pellet	3	Centrifuge 1
HspB8:102:x:HspB8:120	VCVNVHSFKPEELMVK-K9-155	HspB8	-	monolink	111		0.24	36.79	0	Pellet	3	Centrifuge 1
HspB8:111:x:HspB8:120	VCVNVHSFKPEELMVKTK-K16-155	HspB8	-	monolink	118		0.22	45.87	0	Pellet	3	Centrifuge 1
HspB8:111:x:HspB8:129	VCVNVHSFKPEELMVKTK-K18-155	HspB8	-	monolink	120		0.28	29.38	0	Pellet	3	Centrifuge 1
HspB8:111:x:HspB8:133	DGYVEVSGKHEEKQQEGGIVSK-K9-156	HspB8	-	monolink	129		0.18	38.65	0	Pellet	3	Centrifuge 1
HspB8:118:x:HspB8:129	HEEKQQEGGIVSK-K4-156	HspB8	-	monolink	133		0.17	47.6	0	Pellet	3	Centrifuge 1
HspB8:120:x:HspB8:120	LKGEATVSFDDPPSAK-K2-155	FUS	-	monolink	339		0.13	41.76	0	Supernatant	3	Centrifuge 1
HspB8:120:x:HspB8:129	GEATVSFDDPPSAKAAIDWFDGK-K14-155	FUS	-	monolink	353		0.22	30.22	0	Supernatant	3	Centrifuge 1
HspB8:120:x:HspB8:133	AAIDWFDGKEFSGNPIK-K9-155	FUS	-	monolink	362		0	48.62	0	Supernatant	3	Centrifuge 1
HspB8:129:x:HspB8:129	EFSGNPIKVSFATR-K8-156	FUS	-	monolink	370		0	38.19	0	Supernatant	3	Centrifuge 1
HspB8:129:x:HspB8:142	AGDWKCPNPTCENMNFSWR-K5-155	FUS	-	monolink	432		0	36.07	0	Supernatant	3	Centrifuge 1
FUS:269:x:FUS:317	NECNQCKAPKPDGPGGGPGGSHMGGNYGDDR-K7-155	FUS	-	monolink	453		0.07	37.87	0	Supernatant	3	Centrifuge 1
FUS:269:x:FUS:321	APKPDGPGGGPGGSHMGGNYGDDR-K3-156	FUS	-	monolink	456		0	36.8	0	Supernatant	3	Centrifuge 1
FUS:269:x:FUS:337	TPPPFPGEPWKVCVNVHSFKPEELMVK-K11-155	HspB8	-	monolink	102		0	27.47	0	Supernatant	3	Centrifuge 1
FUS:269:x:FUS:339	VCVNVHSFKPEELMVK-K9-155	HspB8	-	monolink	111		0.26	40.34	0	Supernatant	3	Centrifuge 1
FUS:269:x:FUS:362	VCVNVHSFKPEELMVKTK-K16-155	HspB8	-	monolink	118		0.18	41.8	0	Supernatant	3	Centrifuge 1
FUS:269:x:FUS:370	VCVNVHSFKPEELMVKTK-K18-155	HspB8	-	monolink	120		0.27	39.05	0	Supernatant	3	Centrifuge 1
FUS:269:x:FUS:432	DGYVEVSGKHEEKQQEGGIVSK-K9-156	HspB8	-	monolink	129		0.13	39.95	0	Supernatant	3	Centrifuge 1
FUS:269:x:FUS:453	DGYVEVSGKHEEKQQEGGIVSK-K13-155	HspB8	-	monolink	133		0.09	43.33	0	Supernatant	3	Centrifuge 1
FUS:269:x:FUS:456	HDSEQDNSDNNTIFVQGLGENVTIESVADYFKQIGIIK-K32-155	FUS	-	monolink	311		0	34.29	0	Pellet	3	Centrifuge 2 (comparative experiment for Lactalbumin)
FUS:317:x:FUS:321	KTGQPMINLYTDRETGK-K1-155	FUS	-	monolink	321		0.09	40.01	0	Pellet	3	Centrifuge 2 (comparative experiment for Lactalbumin)
FUS:317:x:FUS:339	ETGKLKGEATVSFDDPPSAK-K4-156	FUS	-	monolink	337		0	42.1	0	Pellet	3	Centrifuge 2 (comparative experiment for Lactalbumin)
FUS:317:x:FUS:432	LKGEATVSFDDPPSAK-K2-155	FUS	-	monolink	339		0.15	46.22	0	Pellet	3	Centrifuge 2 (comparative experiment for Lactalbumin)
FUS:321:x:FUS:432	GEATVSFDDPPSAKAAIDWFDGK-K14-156	FUS	-	monolink	353		0.08	44.9	0	Pellet	3	Centrifuge 2 (comparative experiment for Lactalbumin)
FUS:337:x:FUS:362	AAIDWFDGKEFSGNPIK-K9-155	FUS	-	monolink	362		0.14	52.87	0	Pellet	3	Centrifuge 2 (comparative experiment for Lactalbumin)
FUS:337:x:FUS:370	AAIDWFDGKEFSGNPIKVSFATR-K17-156	FUS	-	monolink	370		0	51.78	0	Pellet	3	Centrifuge 2 (comparative experiment for Lactalbumin)
FUS:337:x:FUS:432	AGDWKCPNPTCENMNFSWR-K5-155	FUS	-	monolink	432		0	40.05	0	Pellet	3	Centrifuge 2 (comparative experiment for Lactalbumin)
FUS:337:x:FUS:453	NECNQCKAPKPDGPGGGPGGSHMGGNYGDDR-K7-155	FUS	-	monolink	453		0.11	38.14	0	Pellet	3	Centrifuge 2 (comparative experiment for Lactalbumin)
FUS:337:x:FUS:515	APKPDGPGGGPGGSHMGGNYGDDRR-K3-155	FUS	-	monolink	456		0	39.77	0	Pellet	3	Centrifuge 2 (comparative experiment for Lactalbumin)
FUS:339:x:FUS:362	TPPPFPGEPWKVCVNVHSFKPEELMVK-K11-155	HspB8	-	monolink	102		0	32.03	0	Pellet	3	Centrifuge 2 (comparative experiment for Lactalbumin)
FUS:339:x:FUS:370	VCVNVHSFKPEELMVK-K9-155	HspB8	-	monolink	111		0.23	40.19	0	Pellet	3	Centrifuge 2 (comparative experiment for Lactalbumin)
FUS:339:x:FUS:432	VCVNVHSFKPEELMVKTK-K16-155	HspB8	-	monolink	118		0.14	44.91	0	Pellet	3	Centrifuge 2 (comparative experiment for Lactalbumin)
FUS:339:x:FUS:456	VCVNVHSFKPEELMVKTK-K18-156	HspB8	-	monolink	120		0	37.2	0	Pellet	3	Centrifuge 2 (comparative experiment for Lactalbumin)
FUS:339:x:FUS:515	DGYVEVSGKHEEKQQEGGIVSK-K9-156	HspB8	-	monolink	129		0.2	45.65	0	Pellet	3	Centrifuge 2 (comparative experiment for Lactalbumin)
FUS:362:x:FUS:432	DGYVEVSGKHEEKQQEGGIVSK-K13-156	HspB8	-	monolink	133		0.04	51.97	0	Pellet	3	Centrifuge 2 (comparative experiment for Lactalbumin)
FUS:362:x:FUS:515	HEEKQQEGGIVSKNFTK-K13-156	HspB8	-	monolink	142		0.1	36.46	0	Pellet	3	Centrifuge 2 (comparative experiment for Lactalbumin)
FUS:370:x:FUS:432	HDSEQDNSDNNTIFVQGLGENVTIESVADYFKQIGIIK-K32-156	FUS	-	monolink	311		0	34.65	0	Supernatant	3	Centrifuge 2 (comparative experiment for Lactalbumin)
FUS:370:x:FUS:453	KTGQPMINLYTDRETGK-K1-155	FUS	-	monolink	321		0	34.14	0	Supernatant	3	Centrifuge 2 (comparative experiment for Lactalbumin)
FUS:370:x:FUS:515	ETGKLKGEATVSFDDPPSAK-K4-156	FUS	-	monolink	337		0	37.25	0	Supernatant	3	Centrifuge 2 (comparative experiment for Lactalbumin)
FUS:432:x:FUS:453	LKGEATVSFDDPPSAK-K2-156	FUS	-	monolink	339		0.17	43.8	0	Supernatant	3	Centrifuge 2 (comparative experiment for Lactalbumin)
FUS:432:x:FUS:456	GEATVSFDDPPSAKAAIDWFDGK-K14-156	FUS	-	monolink	353		0.15	36.39	0	Supernatant	3	Centrifuge 2 (comparative experiment for Lactalbumin)
FUS:432:x:FUS:515	AAIDWFDGKEFSGNPIK-K9-155	FUS	-	monolink	362		0.06	45.7	0	Supernatant	3	Centrifuge 2 (comparative experiment for Lactalbumin)
FUS:453:x:FUS:515	AAIDWFDGKEFSGNPIKVSFATR-K17-156	FUS	-	monolink	370		0	51.79	0	Supernatant	3	Centrifuge 2 (comparative experiment for Lactalbumin)
FUS:456:x:FUS:515	AGDWKCPNPTCENMNFSWR-K5-155	FUS	-	monolink	432		0	33.74	0	Supernatant	3	Centrifuge 2 (comparative experiment for Lactalbumin)
HspB8::x:HspB8:120	NECNQCKAPKPDGPGGGPGGSHMGGNYGDDR-K7-155	FUS	-	monolink	453		0	39.32	0	Supernatant	3	Centrifuge 2 (comparative experiment for Lactalbumin)
HspB8:111:x:HspB8:120	APKPDGPGGGPGGSHMGGNYGDDR-K3-155	FUS	-	monolink	456		0	40.34	0	Supernatant	3	Centrifuge 2 (comparative experiment for Lactalbumin)
HspB8:111:x:HspB8:129	TPPPFPGEPWKVCVNVHSFKPEELMVK-K11-155	HspB8	-	monolink	102		0	31.07	0	Supernatant	3	Centrifuge 2 (comparative experiment for Lactalbumin)
HspB8:111:x:HspB8:133	VCVNVHSFKPEELMVK-K9-156	HspB8	-	monolink	111		0.27	41.08	0	Supernatant	3	Centrifuge 2 (comparative experiment for Lactalbumin)
HspB8:118:x:HspB8:129	VCVNVHSFKPEELMVKTK-K16-155	HspB8	-	monolink	118		0.17	45.96	0	Supernatant	3	Centrifuge 2 (comparative experiment for Lactalbumin)
HspB8:120:x:HspB8:129	TKDGYVEVSGKHEEK-K2-156	HspB8	-	monolink	120		0.12	32.76	0	Supernatant	3	Centrifuge 2 (comparative experiment for Lactalbumin)
HspB8:120:x:HspB8:133	DGYVEVSGKHEEKQQEGGIVSK-K9-155	HspB8	-	monolink	129		0.04	43.18	0	Supernatant	3	Centrifuge 2 (comparative experiment for Lactalbumin)
HspB8:129:x:HspB8:129	DGYVEVSGKHEEKQQEGGIVSK-K13-156	HspB8	-	monolink	133		0.12	47.32	0	Supernatant	3	Centrifuge 2 (comparative experiment for Lactalbumin)
HspB8:129:x:HspB8:142	QQEGGIVSKNFTKK-K9-156	HspB8	-	monolink	142		0	29.11	0	Supernatant	2	Centrifuge 2 (comparative experiment for Lactalbumin)
FUS:311	HDSEQDNSDNNTIFVQGLGENVTIESVADYFKQIGIIK-K32-155	FUS	-	monolink	311		0	50.84	0	Pellet	3	Centrifuge 3
FUS:321	KTGQPMINLYTDR-K1-155	FUS	-	monolink	321		0	41.21	0	Pellet	2	Centrifuge 3
FUS:337	TGQPMINLYTDRETGKLK-K16-156	FUS	-	monolink	337		0	27.71	0	Pellet	3	Centrifuge 3
FUS:339	LKGEATVSFDDPPSAK-K2-156	FUS	-	monolink	339		0.27	47.71	0	Pellet	3	Centrifuge 3
FUS:353	LKGEATVSFDDPPSAKAAIDWFDGK-K16-155	FUS	-	monolink	353		0.08	39.14	0	Pellet	3	Centrifuge 3
FUS:362	AAIDWFDGKEFSGNPIK-K9-155	FUS	-	monolink	362		0.13	54.81	0	Pellet	3	Centrifuge 3
FUS:370	EFSGNPIKVSFATR-K8-156	FUS	-	monolink	370		0	53.44	0	Pellet	3	Centrifuge 3
FUS:432	AGDWKCPNPTCENMNFSWR-K5-155	FUS	-	monolink	432		0.05	46.87	0	Pellet	3	Centrifuge 3
FUS:453	NECNQCKAPKPDGPGGGPGGSHMGGNYGDDR-K7-155	FUS	-	monolink	453		0	38.53	0	Pellet	3	Centrifuge 3
FUS:456	APKPDGPGGGPGGSHMGGNYGDDR-K3-155	FUS	-	monolink	456		0	41.31	0	Pellet	3	Centrifuge 3
HspB8:102	TPPPFPGEPWKVCVNVHSFKPEELMVK-K11-155	HspB8	-	monolink	102		0	29.86	0	Pellet	3	Centrifuge 3
HspB8:111	VCVNVHSFKPEELMVK-K9-155	HspB8	-	monolink	111		0.28	43.88	0	Pellet	3	Centrifuge 3
HspB8:118	VCVNVHSFKPEELMVKTK-K16-156	HspB8	-	monolink	118		0.11	43.99	0	Pellet	3	Centrifuge 3
HspB8:120	VCVNVHSFKPEELMVKTK-K18-155	HspB8	-	monolink	120		0.21	43.91	0	Pellet	3	Centrifuge 3
HspB8:129	DGYVEVSGKHEEKQQEGGIVSK-K9-155	HspB8	-	monolink	129		0.23	41	0	Pellet	3	Centrifuge 3
HspB8:133	HEEKQQEGGIVSK-K4-156	HspB8	-	monolink	133		0.31	47.9	0	Pellet	3	Centrifuge 3
HspB8:142	QQEGGIVSKNFTKK-K9-156	HspB8	-	monolink	142		0.18	36.1	0	Pellet	3	Centrifuge 3
FUS:311	HDSEQDNSDNNTIFVQGLGENVTIESVADYFKQIGIIK-K32-156	FUS	-	monolink	311		0	39.52	0	Supernatant	3	Centrifuge 3
FUS:321	KTGQPMINLYTDRETGK-K1-156	FUS	-	monolink	321		0.09	31.82	0	Supernatant	3	Centrifuge 3
FUS:337	TGQPMINLYTDRETGKLK-K16-156	FUS	-	monolink	337		0.03	25.13	0	Supernatant	2	Centrifuge 3
FUS:339	LKGEATVSFDDPPSAK-K2-155	FUS	-	monolink	339		0.17	43.37	0	Supernatant	3	Centrifuge 3
FUS:353	GEATVSFDDPPSAKAAIDWFDGK-K14-155	FUS	-	monolink	353		0.09	41.9	0	Supernatant	3	Centrifuge 3
FUS:362	AAIDWFDGKEFSGNPIK-K9-155	FUS	-	monolink	362		0.12	51.73	0	Supernatant	3	Centrifuge 3
FUS:370	EFSGNPIKVSFATR-K8-156	FUS	-	monolink	370		0	51.36	0	Supernatant	3	Centrifuge 3
FUS:432	AGDWKCPNPTCENMNFSWR-K5-156	FUS	-	monolink	432		0	41.56	0	Supernatant	3	Centrifuge 3
FUS:453	NECNQCKAPKPDGPGGGPGGSHMGGNYGDDR-K7-155	FUS	-	monolink	453		0.13	39.29	0	Supernatant	3	Centrifuge 3
FUS:456	APKPDGPGGGPGGSHMGGNYGDDR-K3-155	FUS	-	monolink	456		0	40.77	0	Supernatant	3	Centrifuge 3
HspB8:102	TPPPFPGEPWKVCVNVHSFKPEELMVK-K11-156	HspB8	-	monolink	102		0	32.76	0	Supernatant	3	Centrifuge 3
HspB8:111	VCVNVHSFKPEELMVK-K9-155	HspB8	-	monolink	111		0.27	41.17	0	Supernatant	3	Centrifuge 3
HspB8:118	VCVNVHSFKPEELMVKTK-K16-155	HspB8	-	monolink	118		0.22	48.35	0	Supernatant	3	Centrifuge 3
HspB8:120	TKDGYVEVSGKHEEK-K2-155	HspB8	-	monolink	120		0.13	38.93	0	Supernatant	3	Centrifuge 3
HspB8:129	DGYVEVSGKHEEKQQEGGIVSK-K9-156	HspB8	-	monolink	129		0.12	43.98	0	Supernatant	3	Centrifuge 3
HspB8:133	HEEKQQEGGIVSK-K4-156	HspB8	-	monolink	133		0.26	49.77	0	Supernatant	3	Centrifuge 3
HspB8:142	QQEGGIVSKNFTKK-K9-156	HspB8	-	monolink	142		0	36.03	0	Supernatant	3	Centrifuge 3
HspB8:146	QQEGGIVSKNFTKK-K13-156	HspB8	-	monolink	146		0.33	30.07	0	Supernatant	2	Centrifuge 3

## Sheet: Table S2
Supplemental Table 2. FUSB8 Salt Experiment Crosslink Identification. Related to Figure 5B, S2F, S3G
Crosslinks were only considered, if they were identified in two out of three replicates with a deltaS < 0.95, a minimum Id score ≥ 20 and an ld score ≥ 25 in at least one replicate (filtering was done on the level of the unique Crosslinking site) and an FDR < 0.05 as calculated by xProphet for at least one replicate.
Only the highest scoring crosslink from three replicates is shown.
uxID	Id	Protein1	Protein2	XLType	AbsPos1	AbsPos2	deltaS	ld-Score	FDR	Salt Concentration	No of Ids in triplicates
FUS:339:x:HspB8:120	LKGEATVSFDDPPSAK-TKDGYVEVSGK-a2-b2	FUS	HspB8	inter-protein xl	339	120	0.32	33.63	0	75 mM KCl	2
FUS:339:x:HspB8:133	LKGEATVSFDDPPSAK-HEEKQQEGGIVSK-a2-b4	FUS	HspB8	inter-protein xl	339	133	0.87	32.67	0	75 mM KCl	3
FUS:370:x:HspB8:120	EFSGNPIKVSFATR-TKDGYVEVSGK-a8-b2	FUS	HspB8	inter-protein xl	370	120	0	27.22	0	75 mM KCl	2
FUS:311:x:FUS:317	HDSEQDNSDNNTIFVQGLGENVTIESVADYFKQIGIIKTNK-K32-K38	FUS	-	looplink	311	317	0	28.72	0	75 mM KCl	2
FUS:320:x:FUS:321	TNKKTGQPMINLYTDR-K3-K4	FUS	-	looplink	320	321	0	40.89	0	75 mM KCl	3
FUS:337:x:FUS:339	ETGKLKGEATVSFDDPPSAK-K4-K6	FUS	-	looplink	337	339	0	37.49	0	75 mM KCl	3
FUS:362:x:FUS:370	AAIDWFDGKEFSGNPIKVSFATR-K9-K17	FUS	-	looplink	362	370	0	36.3	0	75 mM KCl	3
FUS:453:x:FUS:456	NECNQCKAPKPDGPGGGPGGSHMGGNYGDDR-K7-K10	FUS	-	looplink	453	456	-0.02	30.11	0	75 mM KCl	3
HspB8:102:x:HspB8:111	TPPPFPGEPWKVCVNVHSFKPEELMVK-K11-K20	HspB8	-	looplink	102	111	0	25.58	0	75 mM KCl	2
HspB8:111:x:HspB8:118	VCVNVHSFKPEELMVKTK-K9-K16	HspB8	-	looplink	111	118	0	33.25	0	75 mM KCl	2
HspB8:111:x:HspB8:120	VCVNVHSFKPEELMVKTKDGYVEVSGK-K9-K18	HspB8	-	looplink	111	120	0	30.74	0	75 mM KCl	2
HspB8:118:x:HspB8:120	VCVNVHSFKPEELMVKTKDGYVEVSGK-K16-K18	HspB8	-	looplink	118	120	0	46.48	0	75 mM KCl	3
HspB8:129:x:HspB8:133	DGYVEVSGKHEEKQQEGGIVSK-K9-K13	HspB8	-	looplink	129	133	0	45.92	0	75 mM KCl	3
HspB8:133:x:HspB8:142	HEEKQQEGGIVSKNFTK-K4-K13	HspB8	-	looplink	133	142	0.5	28.36	0	75 mM KCl	3
HspB8:142:x:HspB8:146	QQEGGIVSKNFTKK-K9-K13	HspB8	-	looplink	142	146	0	36.71	0	75 mM KCl	3
HspB8:142:x:HspB8:147	QQEGGIVSKNFTKK-K9-K14	HspB8	-	looplink	142	147	0.44	35.85	0	75 mM KCl	2
HspB8:146:x:HspB8:147	QQEGGIVSKNFTKK-K13-K14	HspB8	-	looplink	146	147	0	35.19	0	75 mM KCl	2
FUS:269:x:FUS:339	LKGEATVSFDDPPSAK-GGFNKFGGPR-a2-b5	FUS	FUS	intra-protein xl	339	269	0	34.98	0	75 mM KCl	3
FUS:317:x:FUS:321	KTGQPMINLYTDR-QIGIIKTNK-a1-b6	FUS	FUS	intra-protein xl	321	317	0	33.11	0	75 mM KCl	3
FUS:337:x:FUS:339	LKGEATVSFDDPPSAK-ETGKLK-a2-b4	FUS	FUS	intra-protein xl	339	337	0.32	32.17	0	75 mM KCl	3
FUS:337:x:FUS:370	EFSGNPIKVSFATR-ETGKLK-a8-b4	FUS	FUS	intra-protein xl	370	337	0	30.17	0	75 mM KCl	3
FUS:339:x:FUS:370	LKGEATVSFDDPPSAK-EFSGNPIKVSFATR-a2-b8	FUS	FUS	intra-protein xl	339	370	0	33.54	0	75 mM KCl	3
FUS:339:x:FUS:515	LKGEATVSFDDPPSAK-GGFGPGKMDSR-a2-b7	FUS	FUS	intra-protein xl	339	515	0	30.23	0	75 mM KCl	3
HspB8:111:x:HspB8:120	VCVNVHSFKPEELMVK-TKDGYVEVSGK-a9-b2	HspB8	HspB8	intra-protein xl	111	120	0.81	33.28	0	75 mM KCl	3
HspB8:120:x:HspB8:120	TKDGYVEVSGK-TKDGYVEVSGK-a2-b2	HspB8	HspB8	intra-protein xl	120	120	0	42.48	0	75 mM KCl	2
HspB8:120:x:HspB8:129	TKDGYVEVSGKHEEK-TKDGYVEVSGK-a11-b2	HspB8	HspB8	intra-protein xl	129	120	0	37.87	0	75 mM KCl	3
HspB8:120:x:HspB8:133	HEEKQQEGGIVSK-TKDGYVEVSGK-a4-b2	HspB8	HspB8	intra-protein xl	133	120	0.81	36.49	0	75 mM KCl	3
HspB8:129:x:HspB8:129	TKDGYVEVSGKHEEK-DGYVEVSGKHEEK-a11-b9	HspB8	HspB8	intra-protein xl	129	129	0.67	41.43	0	75 mM KCl	3
HspB8:129:x:HspB8:133	DGYVEVSGKHEEK-HEEKQQEGGIVSK-a9-b4	HspB8	HspB8	intra-protein xl	129	133	0.74	32.24	0	75 mM KCl	3
FUS:311	HDSEQDNSDNNTIFVQGLGENVTIESVADYFKQIGIIK-K32-156	FUS	-	monolink	311		0	50.93	0	75 mM KCl	3
FUS:321	KTGQPMINLYTDRETGK-K1-155	FUS	-	monolink	321		0	36.17	0	75 mM KCl	3
FUS:337	ETGKLKGEATVSFDDPPSAK-K4-155	FUS	-	monolink	337		0	40.04	0	75 mM KCl	3
FUS:339	LKGEATVSFDDPPSAK-K2-155	FUS	-	monolink	339		0.13	39.8	0	75 mM KCl	3
FUS:353	LKGEATVSFDDPPSAKAAIDWFDGK-K16-156	FUS	-	monolink	353		0.02	39	0	75 mM KCl	3
FUS:362	AAIDWFDGKEFSGNPIK-K9-155	FUS	-	monolink	362		0.26	48.31	0	75 mM KCl	3
FUS:370	EFSGNPIKVSFATR-K8-156	FUS	-	monolink	370		0	47.9	0	75 mM KCl	3
FUS:453	NECNQCKAPKPDGPGGGPGGSHMGGNYGDDR-K7-155	FUS	-	monolink	453		0.07	32.81	0	75 mM KCl	3
FUS:456	APKPDGPGGGPGGSHMGGNYGDDR-K3-155	FUS	-	monolink	456		0	33.99	0	75 mM KCl	3
HspB8:102	TPPPFPGEPWKVCVNVHSFKPEELMVK-K11-155	HspB8	-	monolink	102		0	28.32	0	75 mM KCl	3
HspB8:111	VCVNVHSFKPEELMVK-K9-156	HspB8	-	monolink	111		0.23	40.5	0	75 mM KCl	3
HspB8:118	VCVNVHSFKPEELMVKTK-K16-155	HspB8	-	monolink	118		0	42.47	0	75 mM KCl	3
HspB8:120	TKDGYVEVSGKHEEK-K2-155	HspB8	-	monolink	120		0.3	39.63	0	75 mM KCl	2
HspB8:129	TKDGYVEVSGKHEEK-K11-155	HspB8	-	monolink	129		0.19	40.16	0	75 mM KCl	3
HspB8:133	HEEKQQEGGIVSK-K4-155	HspB8	-	monolink	133		0.28	49.09	0	75 mM KCl	3
HspB8:142	HEEKQQEGGIVSKNFTK-K13-156	HspB8	-	monolink	142		0	39.56	0	75 mM KCl	3
FUS:515:x:HspB8:	ZGPLGSMADGQMPFSCHYPSR-GGFGPGKMDSR-a1-b7	HspB8	FUS	inter-protein xl	1	515	0	25.11	0	500 mM KCl	2
FUS:515:x:HspB8:129	DGYVEVSGKHEEK-GGFGPGKMDSR-a9-b7	HspB8	FUS	inter-protein xl	129	515	0.73	30.25	0	500 mM KCl	2
FUS:311:x:FUS:317	HDSEQDNSDNNTIFVQGLGENVTIESVADYFKQIGIIKTNK-K32-K38	FUS	-	looplink	311	317	0	32.75	0	500 mM KCl	3
FUS:320:x:FUS:321	TNKKTGQPMINLYTDR-K3-K4	FUS	-	looplink	320	321	0	35.73	0	500 mM KCl	3
FUS:337:x:FUS:339	ETGKLKGEATVSFDDPPSAK-K4-K6	FUS	-	looplink	337	339	0	36.85	0	500 mM KCl	3
FUS:353:x:FUS:362	GEATVSFDDPPSAKAAIDWFDGKEFSGNPIK-K14-K23	FUS	-	looplink	353	362	0.03	26.27	0	500 mM KCl	2
FUS:362:x:FUS:370	AAIDWFDGKEFSGNPIKVSFATR-K9-K17	FUS	-	looplink	362	370	0	38.24	0	500 mM KCl	3
FUS:453:x:FUS:456	NECNQCKAPKPDGPGGGPGGSHMGGNYGDDR-K7-K10	FUS	-	looplink	453	456	0.03	31.21	0	500 mM KCl	3
HspB8:111:x:HspB8:118	VCVNVHSFKPEELMVKTKDGYVEVSGK-K9-K16	HspB8	-	looplink	111	118	0	28.58	0	500 mM KCl	3
HspB8:111:x:HspB8:120	VCVNVHSFKPEELMVKTKDGYVEVSGK-K9-K18	HspB8	-	looplink	111	120	0	27.14	0	500 mM KCl	3
HspB8:118:x:HspB8:120	VCVNVHSFKPEELMVKTKDGYVEVSGK-K16-K18	HspB8	-	looplink	118	120	0	49.15	0	500 mM KCl	3
HspB8:129:x:HspB8:133	DGYVEVSGKHEEKQQEGGIVSK-K9-K13	HspB8	-	looplink	129	133	0.03	43.73	0	500 mM KCl	3
HspB8:133:x:HspB8:142	HEEKQQEGGIVSKNFTK-K4-K13	HspB8	-	looplink	133	142	0	31.48	0	500 mM KCl	2
HspB8:142:x:HspB8:146	QQEGGIVSKNFTKK-K9-K13	HspB8	-	looplink	142	146	0.44	34.18	0	500 mM KCl	2
HspB8:142:x:HspB8:147	QQEGGIVSKNFTKK-K9-K14	HspB8	-	looplink	142	147	0	35.47	0	500 mM KCl	3
FUS:269:x:FUS:339	LKGEATVSFDDPPSAK-GGFNKFGGPR-a2-b5	FUS	FUS	intra-protein xl	339	269	0.37	41.71	0	500 mM KCl	3
FUS:269:x:FUS:362	AAIDWFDGKEFSGNPIK-GGFNKFGGPR-a9-b5	FUS	FUS	intra-protein xl	362	269	0	30.55	0	500 mM KCl	2
FUS:269:x:FUS:370	EFSGNPIKVSFATR-GGFNKFGGPR-a8-b5	FUS	FUS	intra-protein xl	370	269	0	30.88	0	500 mM KCl	3
FUS:269:x:FUS:515	GGFGPGKMDSR-GGFNKFGGPR-a7-b5	FUS	FUS	intra-protein xl	515	269	0	41.02	0	500 mM KCl	3
FUS:317:x:FUS:321	KTGQPMINLYTDR-QIGIIKTNK-a1-b6	FUS	FUS	intra-protein xl	321	317	0	30.7	0	500 mM KCl	3
FUS:321:x:FUS:339	LKGEATVSFDDPPSAK-KTGQPMINLYTDR-a2-b1	FUS	FUS	intra-protein xl	339	321	0.53	34.53	0	500 mM KCl	3
FUS:337:x:FUS:370	EFSGNPIKVSFATR-ETGKLK-a8-b4	FUS	FUS	intra-protein xl	370	337	0.32	34.14	0	500 mM KCl	3
FUS:339:x:FUS:362	AAIDWFDGKEFSGNPIKVSFATR-LKGEATVSFDDPPSAK-a9-b2	FUS	FUS	intra-protein xl	362	339	0.39	27.71	0.03	500 mM KCl	2
FUS:339:x:FUS:370	LKGEATVSFDDPPSAK-EFSGNPIKVSFATR-a2-b8	FUS	FUS	intra-protein xl	339	370	0.47	33.15	0	500 mM KCl	3
FUS:339:x:FUS:456	APKPDGPGGGPGGSHMGGNYGDDR-LKGEATVSFDDPPSAK-a3-b2	FUS	FUS	intra-protein xl	456	339	0.33	26.32	0	500 mM KCl	3
FUS:339:x:FUS:515	LKGEATVSFDDPPSAK-GGFGPGKMDSR-a2-b7	FUS	FUS	intra-protein xl	339	515	0.36	37.31	0	500 mM KCl	3
FUS:362:x:FUS:515	AAIDWFDGKEFSGNPIK-GGFGPGKMDSR-a9-b7	FUS	FUS	intra-protein xl	362	515	0	37.97	0	500 mM KCl	2
FUS:432:x:FUS:515	AGDWKCPNPTCENMNFSWR-GGFGPGKMDSR-a5-b7	FUS	FUS	intra-protein xl	432	515	0.6	28.35	0.03	500 mM KCl	3
FUS:456:x:FUS:515	APKPDGPGGGPGGSHMGGNYGDDR-GGFGPGKMDSR-a3-b7	FUS	FUS	intra-protein xl	456	515	0	27.9	0	500 mM KCl	3
FUS:515:x:FUS:515	GGFGPGKMDSR-GGFGPGKMDSR-a7-b7	FUS	FUS	intra-protein xl	515	515	0	39.72	0	500 mM KCl	3
HspB8::x:HspB8:	ZGPLGSMADGQMPFSCHYPSR-ZGPLGSMADGQMPFSCHYPSR-a1-b1	HspB8	HspB8	intra-protein xl	1	1	0	31.94	0	500 mM KCl	3
HspB8::x:HspB8:120	ZGPLGSMADGQMPFSCHYPSR-TKDGYVEVSGK-a1-b2	HspB8	HspB8	intra-protein xl	1	120	0	26.1	0.03	500 mM KCl	3
HspB8::x:HspB8:129	ZGPLGSMADGQMPFSCHYPSR-TKDGYVEVSGKHEEK-a1-b11	HspB8	HspB8	intra-protein xl	1	129	0.72	28.43	0.03	500 mM KCl	3
HspB8:111:x:HspB8:120	VCVNVHSFKPEELMVK-TKDGYVEVSGK-a9-b2	HspB8	HspB8	intra-protein xl	111	120	0.67	31.79	0	500 mM KCl	3
HspB8:111:x:HspB8:129	VCVNVHSFKPEELMVK-DGYVEVSGKHEEK-a9-b9	HspB8	HspB8	intra-protein xl	111	129	0.66	29.07	0	500 mM KCl	3
HspB8:118:x:HspB8:129	VCVNVHSFKPEELMVKTK-DGYVEVSGKHEEK-a16-b9	HspB8	HspB8	intra-protein xl	118	129	0.59	30.47	0	500 mM KCl	3
HspB8:120:x:HspB8:129	TKDGYVEVSGKHEEK-TKDGYVEVSGK-a11-b2	HspB8	HspB8	intra-protein xl	129	120	0.62	39.11	0	500 mM KCl	3
HspB8:120:x:HspB8:133	HEEKQQEGGIVSK-TKDGYVEVSGK-a4-b2	HspB8	HspB8	intra-protein xl	133	120	0.86	28.42	0.03	500 mM KCl	2
HspB8:129:x:HspB8:129	TKDGYVEVSGKHEEK-TKDGYVEVSGKHEEK-a11-b11	HspB8	HspB8	intra-protein xl	129	129	0.79	36.5	0	500 mM KCl	3
HspB8:129:x:HspB8:142	TKDGYVEVSGKHEEK-QQEGGIVSKNFTK-a11-b9	HspB8	HspB8	intra-protein xl	129	142	0.87	29.84	0	500 mM KCl	3
FUS:311	HDSEQDNSDNNTIFVQGLGENVTIESVADYFKQIGIIK-K32-156	FUS	-	monolink	311		0	36.05	0	500 mM KCl	3
FUS:321	KTGQPMINLYTDR-K1-155	FUS	-	monolink	321		0	40.74	0	500 mM KCl	3
FUS:337	ETGKLKGEATVSFDDPPSAK-K4-156	FUS	-	monolink	337		0	37.67	0	500 mM KCl	3
FUS:339	LKGEATVSFDDPPSAK-K2-155	FUS	-	monolink	339		0	41.24	0	500 mM KCl	3
FUS:353	LKGEATVSFDDPPSAKAAIDWFDGK-K16-156	FUS	-	monolink	353		0.01	34.15	0	500 mM KCl	3
FUS:362	AAIDWFDGKEFSGNPIK-K9-155	FUS	-	monolink	362		0.15	47.78	0	500 mM KCl	3
FUS:370	EFSGNPIKVSFATR-K8-156	FUS	-	monolink	370		0	48.51	0	500 mM KCl	3
FUS:432	AGDWKCPNPTCENMNFSWR-K5-155	FUS	-	monolink	432		0	42.33	0	500 mM KCl	3
FUS:453	NECNQCKAPKPDGPGGGPGGSHMGGNYGDDR-K7-155	FUS	-	monolink	453		0.11	35.15	0	500 mM KCl	3
FUS:456	APKPDGPGGGPGGSHMGGNYGDDR-K3-156	FUS	-	monolink	456		0	33.5	0	500 mM KCl	3
HspB8:102	TPPPFPGEPWKVCVNVHSFKPEELMVK-K11-155	HspB8	-	monolink	102		0	25.27	0	500 mM KCl	3
HspB8:111	VCVNVHSFKPEELMVK-K9-155	HspB8	-	monolink	111		0.14	39.67	0	500 mM KCl	3
HspB8:118	VCVNVHSFKPEELMVKTK-K16-155	HspB8	-	monolink	118		0.16	48.97	0	500 mM KCl	3
HspB8:120	VCVNVHSFKPEELMVKTK-K18-155	HspB8	-	monolink	120		0.25	31.94	0	500 mM KCl	2
HspB8:129	DGYVEVSGKHEEKQQEGGIVSK-K9-155	HspB8	-	monolink	129		0.07	40.43	0	500 mM KCl	3
HspB8:133	HEEKQQEGGIVSK-K4-155	HspB8	-	monolink	133		0.25	47.94	0	500 mM KCl	3
HspB8:142	HEEKQQEGGIVSKNFTK-K13-155	HspB8	-	monolink	142		0.09	38.17	0	500 mM KCl	3

## Sheet: Table S3
Supplemental Table 3. FUS Lactalbumin Centrifuge Experiment Crosslink Identification. Related to Figure S2I
Crosslinks were only considered, if they were identified in two out of three replicates with a deltaS < 0.95, a minimum Id score ≥ 20 and an ld score ≥ 25 in at least one replicate (filtering was done on the level of the unique Crosslinking site) and an FDR < 0.05 as calculated by xProphet for at least one replicate.
Only the highest scoring crosslink from three replicates is shown.
uxID	Id	Protein1	Protein2	XLType	AbsPos1	AbsPos2	deltaS	ld-Score	FDR	Fraction	No of Ids in triplicates
Alpha-lactalbumin:141:x:FUS:317	LDQWLCEKL-QIGIIKTNK-a8-b6	Alpha-lactalbumin	FUS	inter-protein xl	141	317	0	29.54	0	Pellet	2
Alpha-lactalbumin:141:x:FUS:339	LKGEATVSFDDPPSAK-LDQWLCEKL-a2-b8	FUS	Alpha-lactalbumin	inter-protein xl	339	141	0	32.68	0	Supernatant	2
Alpha-lactalbumin:141:x:FUS:515	GGFGPGKMDSR-LDQWLCEKL-a7-b8	FUS	Alpha-lactalbumin	inter-protein xl	515	141	0	35.01	0	Supernatant	3
Alpha-lactalbumin:141:x:FUS:515	GGFGPGKMDSR-LDQWLCEKL-a7-b8	FUS	Alpha-lactalbumin	inter-protein xl	515	141	0	33.62	0	Pellet	2
Alpha-lactalbumin:32:x:FUS:339	LKGEATVSFDDPPSAK-ELKDLK-a2-b3	FUS	Alpha-lactalbumin	inter-protein xl	339	32	0.25	35.32	0	Supernatant	3
Alpha-lactalbumin:32:x:FUS:339	LKGEATVSFDDPPSAK-ELKDLK-a2-b3	FUS	Alpha-lactalbumin	inter-protein xl	339	32	0.29	34.49	0	Pellet	3
Alpha-lactalbumin:32:x:FUS:362	AAIDWFDGKEFSGNPIK-ELKDLK-a9-b3	FUS	Alpha-lactalbumin	inter-protein xl	362	32	0	39.82	0	Supernatant	2
Alpha-lactalbumin:32:x:FUS:362	AAIDWFDGKEFSGNPIK-ELKDLK-a9-b3	FUS	Alpha-lactalbumin	inter-protein xl	362	32	0	37.51	0	Pellet	3
Alpha-lactalbumin:32:x:FUS:370	EFSGNPIKVSFATR-ELKDLK-a8-b3	FUS	Alpha-lactalbumin	inter-protein xl	370	32	0	33.62	0	Pellet	3
Alpha-lactalbumin:32:x:FUS:432	AGDWKCPNPTCENMNFSWR-ELKDLK-a5-b3	FUS	Alpha-lactalbumin	inter-protein xl	432	32	0	40.9	0	Pellet	2
Alpha-lactalbumin:32:x:FUS:453	NECNQCKAPKPDGPGGGPGGSHMGGNYGDDR-ELKDLK-a7-b3	FUS	Alpha-lactalbumin	inter-protein xl	453	32	0	38.92	0	Pellet	2
Alpha-lactalbumin:32:x:FUS:515	GGFGPGKMDSR-ELKDLK-a7-b3	FUS	Alpha-lactalbumin	inter-protein xl	515	32	0.52	36.43	0	Supernatant	3
Alpha-lactalbumin:81:x:FUS:515	IWCKDDQNPHSSNICNISCDK-GGFGPGKMDSR-a4-b7	Alpha-lactalbumin	FUS	inter-protein xl	81	515	0.49	47.07	0	Pellet	2
Alpha-lactalbumin:112:x:Alpha-lactalbumin:113	FLDDDLTDDIMCVKK-K14-K15	Alpha-lactalbumin	-	looplink	112	113	0	50.02	0	Supernatant	3
Alpha-lactalbumin:113:x:Alpha-lactalbumin:117	KILDKVGINYWLAHK-K1-K5	Alpha-lactalbumin	-	looplink	113	117	0.13	39.19	0	Pellet	3
Alpha-lactalbumin:113:x:Alpha-lactalbumin:117	KILDKVGINYWLAHK-K1-K5	Alpha-lactalbumin	-	looplink	113	117	0.12	38.49	0	Supernatant	3
Alpha-lactalbumin:117:x:Alpha-lactalbumin:127	ILDKVGINYWLAHK-K4-K14	Alpha-lactalbumin	-	looplink	117	127	0	36.7	0	Pellet	3
Alpha-lactalbumin:117:x:Alpha-lactalbumin:127	ILDKVGINYWLAHK-K4-K14	Alpha-lactalbumin	-	looplink	117	127	0	34.68	0	Supernatant	3
Alpha-lactalbumin:127:x:Alpha-lactalbumin:133	VGINYWLAHKALCSEKLDQWLCEK-K10-K16	Alpha-lactalbumin	-	looplink	127	133	0.17	48.75	0	Supernatant	3
Alpha-lactalbumin:127:x:Alpha-lactalbumin:133	VGINYWLAHKALCSEKLDQWLCEK-K10-K16	Alpha-lactalbumin	-	looplink	127	133	0.12	48.42	0	Pellet	3
Alpha-lactalbumin:133:x:Alpha-lactalbumin:141	ALCSEKLDQWLCEK-K6-K14	Alpha-lactalbumin	-	looplink	133	141	0	25.44	0	Supernatant	3
Alpha-lactalbumin:32:x:Alpha-lactalbumin:35	ELKDLKGYGGVSLPEWVCTTFHTSGYDTQAIVQNNDSTEYGLFQINNK-K3-K6	Alpha-lactalbumin	-	looplink	32	35	0	49.45	0	Supernatant	3
Alpha-lactalbumin:81:x:Alpha-lactalbumin:98	IWCKDDQNPHSSNICNISCDKFLDDDLTDDIMCVK-K4-K21	Alpha-lactalbumin	-	looplink	81	98	0.16	45.1	0	Supernatant	3
Alpha-lactalbumin:81:x:Alpha-lactalbumin:98	IWCKDDQNPHSSNICNISCDKFLDDDLTDDIMCVK-K4-K21	Alpha-lactalbumin	-	looplink	81	98	0.22	44.3	0	Pellet	3
FUS:320:x:FUS:321	TNKKTGQPMINLYTDR-K3-K4	FUS	-	looplink	320	321	0	40.69	0	Supernatant	3
FUS:337:x:FUS:339	ETGKLKGEATVSFDDPPSAK-K4-K6	FUS	-	looplink	337	339	0	44.18	0	Supernatant	3
FUS:337:x:FUS:339	ETGKLKGEATVSFDDPPSAK-K4-K6	FUS	-	looplink	337	339	0	41.66	0	Pellet	3
FUS:353:x:FUS:362	GEATVSFDDPPSAKAAIDWFDGKEFSGNPIK-K14-K23	FUS	-	looplink	353	362	0	28.82	0	Supernatant	2
FUS:362:x:FUS:370	AAIDWFDGKEFSGNPIKVSFATR-K9-K17	FUS	-	looplink	362	370	0	41.09	0	Supernatant	3
FUS:362:x:FUS:370	AAIDWFDGKEFSGNPIK-K9-K17	FUS	-	looplink	362	370	0.35	38.5	0	Pellet	3
FUS:453:x:FUS:456	NECNQCKAPKPDGPGGGPGGSHMGGNYGDDR-K7-K10	FUS	-	looplink	453	456	0.14	32.17	0	Supernatant	3
FUS:453:x:FUS:456	NECNQCKAPKPDGPGGGPGGSHMGGNYGDDR-K7-K10	FUS	-	looplink	453	456	0.2	32.01	0	Pellet	3
Alpha-lactalbumin:112:x:Alpha-lactalbumin:117	FLDDDLTDDIMCVKK-ILDKVGINYWLAHK-a14-b4	Alpha-lactalbumin	Alpha-lactalbumin	intra-protein xl	112	117	0.51	42.22	0	Supernatant	3
Alpha-lactalbumin:112:x:Alpha-lactalbumin:117	FLDDDLTDDIMCVKK-ILDKVGINYWLAHK-a14-b4	Alpha-lactalbumin	Alpha-lactalbumin	intra-protein xl	112	117	0.77	40.84	0	Pellet	3
Alpha-lactalbumin:112:x:Alpha-lactalbumin:127	VGINYWLAHKALCSEK-FLDDDLTDDIMCVKK-a10-b14	Alpha-lactalbumin	Alpha-lactalbumin	intra-protein xl	127	112	0.78	38.09	0	Supernatant	3
Alpha-lactalbumin:112:x:Alpha-lactalbumin:127	VGINYWLAHKALCSEK-FLDDDLTDDIMCVKK-a10-b14	Alpha-lactalbumin	Alpha-lactalbumin	intra-protein xl	127	112	0.82	33.46	0	Pellet	2
Alpha-lactalbumin:112:x:Alpha-lactalbumin:133	FLDDDLTDDIMCVKK-ALCSEKLDQWLCEK-a14-b6	Alpha-lactalbumin	Alpha-lactalbumin	intra-protein xl	112	133	0.63	43.42	0	Supernatant	3
Alpha-lactalbumin:112:x:Alpha-lactalbumin:133	FLDDDLTDDIMCVKK-ALCSEKLDQWLCEK-a14-b6	Alpha-lactalbumin	Alpha-lactalbumin	intra-protein xl	112	133	0	36.26	0	Pellet	3
Alpha-lactalbumin:112:x:Alpha-lactalbumin:141	FLDDDLTDDIMCVKK-LDQWLCEKL-a14-b8	Alpha-lactalbumin	Alpha-lactalbumin	intra-protein xl	112	141	0	38.45	0	Supernatant	3
Alpha-lactalbumin:112:x:Alpha-lactalbumin:32	FLDDDLTDDIMCVKK-ELKDLK-a14-b3	Alpha-lactalbumin	Alpha-lactalbumin	intra-protein xl	112	32	0.41	37.07	0	Supernatant	3
Alpha-lactalbumin:112:x:Alpha-lactalbumin:32	FLDDDLTDDIMCVKK-ELKDLK-a14-b3	Alpha-lactalbumin	Alpha-lactalbumin	intra-protein xl	112	32	0.43	36.54	0	Pellet	3
Alpha-lactalbumin:112:x:Alpha-lactalbumin:81	IWCKDDQNPHSSNICNISCDK-FLDDDLTDDIMCVKK-a4-b14	Alpha-lactalbumin	Alpha-lactalbumin	intra-protein xl	81	112	0.64	31.38	0	Supernatant	3
Alpha-lactalbumin:113:x:Alpha-lactalbumin:32	KILDKVGINYWLAHK-ELKDLK-a1-b3	Alpha-lactalbumin	Alpha-lactalbumin	intra-protein xl	113	32	0.44	37.13	0	Supernatant	2
Alpha-lactalbumin:117:x:Alpha-lactalbumin:117	ILDKVGINYWLAHK-ILDKVGINYWLAHK-a4-b4	Alpha-lactalbumin	Alpha-lactalbumin	intra-protein xl	117	117	0	27.12	0.022	Pellet	2
Alpha-lactalbumin:117:x:Alpha-lactalbumin:127	VGINYWLAHKALCSEK-ILDKVGINYWLAHK-a10-b4	Alpha-lactalbumin	Alpha-lactalbumin	intra-protein xl	127	117	0.68	40.73	0	Supernatant	3
Alpha-lactalbumin:117:x:Alpha-lactalbumin:127	VGINYWLAHKALCSEK-ILDKVGINYWLAHK-a10-b4	Alpha-lactalbumin	Alpha-lactalbumin	intra-protein xl	127	117	0.68	33.39	0	Pellet	2
Alpha-lactalbumin:117:x:Alpha-lactalbumin:133	ALCSEKLDQWLCEKL-ILDKVGINYWLAHK-a6-b4	Alpha-lactalbumin	Alpha-lactalbumin	intra-protein xl	133	117	0.66	54.09	0	Supernatant	3
Alpha-lactalbumin:117:x:Alpha-lactalbumin:133	ALCSEKLDQWLCEK-ILDKVGINYWLAHK-a6-b4	Alpha-lactalbumin	Alpha-lactalbumin	intra-protein xl	133	117	0	47.06	0	Pellet	3
Alpha-lactalbumin:117:x:Alpha-lactalbumin:141	ILDKVGINYWLAHK-LDQWLCEKL-a4-b8	Alpha-lactalbumin	Alpha-lactalbumin	intra-protein xl	117	141	0	43.22	0	Supernatant	3
Alpha-lactalbumin:117:x:Alpha-lactalbumin:141	ILDKVGINYWLAHK-LDQWLCEKL-a4-b8	Alpha-lactalbumin	Alpha-lactalbumin	intra-protein xl	117	141	0	33.6	0	Pellet	2
Alpha-lactalbumin:117:x:Alpha-lactalbumin:32	KILDKVGINYWLAHK-ELKDLK-a5-b3	Alpha-lactalbumin	Alpha-lactalbumin	intra-protein xl	117	32	0	40.5	0	Supernatant	3
Alpha-lactalbumin:117:x:Alpha-lactalbumin:32	ILDKVGINYWLAHK-ELKDLK-a4-b3	Alpha-lactalbumin	Alpha-lactalbumin	intra-protein xl	117	32	0.46	40.36	0	Pellet	3
Alpha-lactalbumin:117:x:Alpha-lactalbumin:81	IWCKDDQNPHSSNICNISCDK-ILDKVGINYWLAHK-a4-b4	Alpha-lactalbumin	Alpha-lactalbumin	intra-protein xl	81	117	0.6	47.18	0	Supernatant	3
Alpha-lactalbumin:117:x:Alpha-lactalbumin:81	IWCKDDQNPHSSNICNISCDK-ILDKVGINYWLAHK-a4-b4	Alpha-lactalbumin	Alpha-lactalbumin	intra-protein xl	81	117	0.76	28.64	0.022	Pellet	3
Alpha-lactalbumin:117:x:Alpha-lactalbumin:98	DDQNPHSSNICNISCDKFLDDDLTDDIMCVK-ILDKVGINYWLAHK-a17-b4	Alpha-lactalbumin	Alpha-lactalbumin	intra-protein xl	98	117	0.32	35.84	0	Supernatant	3
Alpha-lactalbumin:127:x:Alpha-lactalbumin:127	VGINYWLAHKALCSEK-VGINYWLAHKALCSEK-a10-b10	Alpha-lactalbumin	Alpha-lactalbumin	intra-protein xl	127	127	0.67	32.91	0	Supernatant	2
Alpha-lactalbumin:127:x:Alpha-lactalbumin:133	VGINYWLAHKALCSEK-ALCSEKLDQWLCEK-a10-b6	Alpha-lactalbumin	Alpha-lactalbumin	intra-protein xl	127	133	0.63	43.6	0	Supernatant	3
Alpha-lactalbumin:127:x:Alpha-lactalbumin:141	VGINYWLAHKALCSEK-LDQWLCEKL-a10-b8	Alpha-lactalbumin	Alpha-lactalbumin	intra-protein xl	127	141	0.72	32.64	0	Pellet	3
Alpha-lactalbumin:127:x:Alpha-lactalbumin:141	VGINYWLAHKALCSEK-LDQWLCEKL-a10-b8	Alpha-lactalbumin	Alpha-lactalbumin	intra-protein xl	127	141	0	30.85	0	Supernatant	3
Alpha-lactalbumin:127:x:Alpha-lactalbumin:32	VGINYWLAHKALCSEK-ELKDLK-a10-b3	Alpha-lactalbumin	Alpha-lactalbumin	intra-protein xl	127	32	0.56	32.32	0.012	Supernatant	3
Alpha-lactalbumin:127:x:Alpha-lactalbumin:32	VGINYWLAHKALCSEK-ELKDLK-a10-b3	Alpha-lactalbumin	Alpha-lactalbumin	intra-protein xl	127	32	0.52	29.81	0	Pellet	3
Alpha-lactalbumin:127:x:Alpha-lactalbumin:81	IWCKDDQNPHSSNICNISCDK-VGINYWLAHKALCSEK-a4-b10	Alpha-lactalbumin	Alpha-lactalbumin	intra-protein xl	81	127	0.46	42.41	0	Supernatant	3
Alpha-lactalbumin:127:x:Alpha-lactalbumin:98	DDQNPHSSNICNISCDKFLDDDLTDDIMCVK-VGINYWLAHKALCSEK-a17-b10	Alpha-lactalbumin	Alpha-lactalbumin	intra-protein xl	98	127	0.35	42.29	0	Supernatant	3
Alpha-lactalbumin:133:x:Alpha-lactalbumin:133	ALCSEKLDQWLCEK-ALCSEKLDQWLCEK-a6-b6	Alpha-lactalbumin	Alpha-lactalbumin	intra-protein xl	133	133	0	43.52	0	Supernatant	3
Alpha-lactalbumin:133:x:Alpha-lactalbumin:141	ALCSEKLDQWLCEK-LDQWLCEKL-a6-b8	Alpha-lactalbumin	Alpha-lactalbumin	intra-protein xl	133	141	0.59	38.73	0	Supernatant	3
Alpha-lactalbumin:133:x:Alpha-lactalbumin:32	ALCSEKLDQWLCEK-ELKDLK-a6-b3	Alpha-lactalbumin	Alpha-lactalbumin	intra-protein xl	133	32	0.21	47.22	0	Supernatant	3
Alpha-lactalbumin:133:x:Alpha-lactalbumin:32	ALCSEKLDQWLCEK-ELKDLK-a6-b3	Alpha-lactalbumin	Alpha-lactalbumin	intra-protein xl	133	32	0.16	46.49	0	Pellet	3
Alpha-lactalbumin:133:x:Alpha-lactalbumin:81	IWCKDDQNPHSSNICNISCDK-ALCSEKLDQWLCEK-a4-b6	Alpha-lactalbumin	Alpha-lactalbumin	intra-protein xl	81	133	0	49.16	0	Supernatant	3
Alpha-lactalbumin:133:x:Alpha-lactalbumin:81	IWCKDDQNPHSSNICNISCDK-ALCSEKLDQWLCEKL-a4-b6	Alpha-lactalbumin	Alpha-lactalbumin	intra-protein xl	81	133	0.63	37.15	0	Pellet	2
Alpha-lactalbumin:133:x:Alpha-lactalbumin:98	DDQNPHSSNICNISCDKFLDDDLTDDIMCVK-ALCSEKLDQWLCEK-a17-b6	Alpha-lactalbumin	Alpha-lactalbumin	intra-protein xl	98	133	0.49	30.88	0.012	Supernatant	2
Alpha-lactalbumin:141:x:Alpha-lactalbumin:141	LDQWLCEKL-LDQWLCEKL-a8-b8	Alpha-lactalbumin	Alpha-lactalbumin	intra-protein xl	141	141	0	32.65	0.012	Supernatant	3
Alpha-lactalbumin:141:x:Alpha-lactalbumin:32	LDQWLCEKL-ELKDLK-a8-b3	Alpha-lactalbumin	Alpha-lactalbumin	intra-protein xl	141	32	0	37.82	0	Supernatant	3
Alpha-lactalbumin:141:x:Alpha-lactalbumin:32	LDQWLCEKL-ELKDLK-a8-b3	Alpha-lactalbumin	Alpha-lactalbumin	intra-protein xl	141	32	0	35.14	0	Pellet	3
Alpha-lactalbumin:141:x:Alpha-lactalbumin:81	IWCKDDQNPHSSNICNISCDK-LDQWLCEKL-a4-b8	Alpha-lactalbumin	Alpha-lactalbumin	intra-protein xl	81	141	0.55	33.36	0.012	Supernatant	3
Alpha-lactalbumin:141:x:Alpha-lactalbumin:81	IWCKDDQNPHSSNICNISCDK-LDQWLCEKL-a4-b8	Alpha-lactalbumin	Alpha-lactalbumin	intra-protein xl	81	141	0.79	25.74	0.022	Pellet	3
Alpha-lactalbumin:141:x:Alpha-lactalbumin:98	DDQNPHSSNICNISCDKFLDDDLTDDIMCVK-LDQWLCEKL-a17-b8	Alpha-lactalbumin	Alpha-lactalbumin	intra-protein xl	98	141	0.42	34.66	0.012	Supernatant	2
Alpha-lactalbumin:32:x:Alpha-lactalbumin:32	ELKDLK-ELKDLK-a3-b3	Alpha-lactalbumin	Alpha-lactalbumin	intra-protein xl	32	32	0	36.43	0	Supernatant	3
Alpha-lactalbumin:32:x:Alpha-lactalbumin:32	ELKDLK-ELKDLK-a3-b3	Alpha-lactalbumin	Alpha-lactalbumin	intra-protein xl	32	32	0	30.33	0.022	Pellet	3
Alpha-lactalbumin:32:x:Alpha-lactalbumin:81	IWCKDDQNPHSSNICNISCDK-ELKDLK-a4-b3	Alpha-lactalbumin	Alpha-lactalbumin	intra-protein xl	81	32	0.32	38.48	0	Supernatant	3
Alpha-lactalbumin:32:x:Alpha-lactalbumin:81	IWCKDDQNPHSSNICNISCDK-ELKDLK-a4-b3	Alpha-lactalbumin	Alpha-lactalbumin	intra-protein xl	81	32	0.42	34.28	0	Pellet	3
Alpha-lactalbumin:32:x:Alpha-lactalbumin:98	IWCKDDQNPHSSNICNISCDKFLDDDLTDDIMCVK-ELKDLK-a21-b3	Alpha-lactalbumin	Alpha-lactalbumin	intra-protein xl	98	32	0.68	42.61	0	Supernatant	3
Alpha-lactalbumin:81:x:Alpha-lactalbumin:81	IWCKDDQNPHSSNICNISCDK-IWCKDDQNPHSSNICNISCDK-a4-b4	Alpha-lactalbumin	Alpha-lactalbumin	intra-protein xl	81	81	0.74	38.78	0	Supernatant	3
FUS:269:x:FUS:317	GGFNKFGGPR-QIGIIKTNK-a5-b6	FUS	FUS	intra-protein xl	269	317	0.54	37.47	0	Supernatant	3
FUS:269:x:FUS:321	KTGQPMINLYTDR-GGFNKFGGPR-a1-b5	FUS	FUS	intra-protein xl	321	269	0	36.37	0	Supernatant	3
FUS:269:x:FUS:339	LKGEATVSFDDPPSAK-GGFNKFGGPR-a2-b5	FUS	FUS	intra-protein xl	339	269	0.3	40.77	0	Pellet	3
FUS:269:x:FUS:339	LKGEATVSFDDPPSAK-GGFNKFGGPR-a2-b5	FUS	FUS	intra-protein xl	339	269	0.25	39.51	0	Supernatant	3
FUS:269:x:FUS:362	AAIDWFDGKEFSGNPIK-GGFNKFGGPR-a9-b5	FUS	FUS	intra-protein xl	362	269	0.42	43.02	0	Pellet	3
FUS:269:x:FUS:362	AAIDWFDGKEFSGNPIK-GGFNKFGGPR-a9-b5	FUS	FUS	intra-protein xl	362	269	0	40.86	0	Supernatant	3
FUS:269:x:FUS:370	EFSGNPIKVSFATR-GGFNKFGGPR-a8-b5	FUS	FUS	intra-protein xl	370	269	0	28.99	0	Supernatant	2
FUS:269:x:FUS:432	AGDWKCPNPTCENMNFSWR-GGFNKFGGPR-a5-b5	FUS	FUS	intra-protein xl	432	269	0	45.08	0	Supernatant	3
FUS:269:x:FUS:453	NECNQCKAPKPDGPGGGPGGSHMGGNYGDDR-GGFNKFGGPR-a7-b5	FUS	FUS	intra-protein xl	453	269	0	35.82	0	Supernatant	2
FUS:269:x:FUS:456	APKPDGPGGGPGGSHMGGNYGDDR-GGFNKFGGPR-a3-b5	FUS	FUS	intra-protein xl	456	269	0	38.94	0	Supernatant	2
FUS:269:x:FUS:515	GGFGPGKMDSR-GGFNKFGGPR-a7-b5	FUS	FUS	intra-protein xl	515	269	0.75	43.4	0	Supernatant	3
FUS:269:x:FUS:515	GGFGPGKMDSR-GGFNKFGGPR-a7-b5	FUS	FUS	intra-protein xl	515	269	0.72	41.4	0	Pellet	2
FUS:317:x:FUS:321	KTGQPMINLYTDR-QIGIIKTNK-a1-b6	FUS	FUS	intra-protein xl	321	317	0	36.68	0	Supernatant	3
FUS:317:x:FUS:321	KTGQPMINLYTDR-QIGIIKTNK-a1-b6	FUS	FUS	intra-protein xl	321	317	0	34.32	0	Pellet	3
FUS:317:x:FUS:339	LKGEATVSFDDPPSAK-QIGIIKTNKK-a2-b6	FUS	FUS	intra-protein xl	339	317	0.23	34.34	0	Pellet	2
FUS:317:x:FUS:362	AAIDWFDGKEFSGNPIK-QIGIIKTNK-a9-b6	FUS	FUS	intra-protein xl	362	317	0.75	36.6	0	Pellet	2
FUS:317:x:FUS:362	AAIDWFDGKEFSGNPIK-QIGIIKTNK-a9-b6	FUS	FUS	intra-protein xl	362	317	0.43	27.35	0	Supernatant	3
FUS:317:x:FUS:515	GGFGPGKMDSR-QIGIIKTNK-a7-b6	FUS	FUS	intra-protein xl	515	317	0.68	38.33	0	Supernatant	3
FUS:321:x:FUS:339	LKGEATVSFDDPPSAK-KTGQPMINLYTDR-a2-b1	FUS	FUS	intra-protein xl	339	321	0.57	44.1	0	Pellet	3
FUS:321:x:FUS:432	AGDWKCPNPTCENMNFSWR-KTGQPMINLYTDR-a5-b1	FUS	FUS	intra-protein xl	432	321	0	34.01	0	Supernatant	2
FUS:321:x:FUS:456	APKPDGPGGGPGGSHMGGNYGDDR-KTGQPMINLYTDR-a3-b1	FUS	FUS	intra-protein xl	456	321	0	27.9	0	Supernatant	2
FUS:337:x:FUS:370	EFSGNPIKVSFATR-ETGKLK-a8-b4	FUS	FUS	intra-protein xl	370	337	0	33.02	0	Supernatant	3
FUS:337:x:FUS:370	EFSGNPIKVSFATR-ETGKLK-a8-b4	FUS	FUS	intra-protein xl	370	337	0	31.97	0	Pellet	3
FUS:337:x:FUS:515	ETGKLKGEATVSFDDPPSAK-GGFGPGKMDSR-a4-b7	FUS	FUS	intra-protein xl	337	515	0	39.07	0	Supernatant	3
FUS:339:x:FUS:362	AAIDWFDGKEFSGNPIK-LKGEATVSFDDPPSAK-a9-b2	FUS	FUS	intra-protein xl	362	339	0.58	42.95	0	Supernatant	3
FUS:339:x:FUS:362	AAIDWFDGKEFSGNPIK-LKGEATVSFDDPPSAK-a9-b2	FUS	FUS	intra-protein xl	362	339	0.56	41.42	0	Pellet	3
FUS:339:x:FUS:370	LKGEATVSFDDPPSAK-EFSGNPIKVSFATR-a2-b8	FUS	FUS	intra-protein xl	339	370	0.55	45.78	0	Supernatant	3
FUS:339:x:FUS:432	AGDWKCPNPTCENMNFSWR-LKGEATVSFDDPPSAK-a5-b2	FUS	FUS	intra-protein xl	432	339	0	39.18	0	Supernatant	3
FUS:339:x:FUS:453	NECNQCKAPKPDGPGGGPGGSHMGGNYGDDR-LKGEATVSFDDPPSAK-a7-b2	FUS	FUS	intra-protein xl	453	339	0.86	28.24	0	Supernatant	3
FUS:339:x:FUS:456	APKPDGPGGGPGGSHMGGNYGDDR-LKGEATVSFDDPPSAK-a3-b2	FUS	FUS	intra-protein xl	456	339	0	34.12	0	Supernatant	3
FUS:339:x:FUS:456	APKPDGPGGGPGGSHMGGNYGDDR-LKGEATVSFDDPPSAK-a3-b2	FUS	FUS	intra-protein xl	456	339	0	30.92	0	Pellet	2
FUS:339:x:FUS:515	LKGEATVSFDDPPSAK-GGFGPGKMDSR-a2-b7	FUS	FUS	intra-protein xl	339	515	0.41	43.43	0	Pellet	3
FUS:339:x:FUS:515	LKGEATVSFDDPPSAK-GGFGPGKMDSR-a2-b7	FUS	FUS	intra-protein xl	339	515	0.42	39.78	0	Supernatant	3
FUS:353:x:FUS:370	LKGEATVSFDDPPSAKAAIDWFDGK-EFSGNPIKVSFATR-a16-b8	FUS	FUS	intra-protein xl	353	370	0.61	36.17	0	Supernatant	3
FUS:362:x:FUS:362	AAIDWFDGKEFSGNPIK-AAIDWFDGKEFSGNPIK-a9-b9	FUS	FUS	intra-protein xl	362	362	0	41.17	0	Pellet	2
FUS:362:x:FUS:370	AAIDWFDGKEFSGNPIKVSFATR-AAIDWFDGKEFSGNPIK-a17-b9	FUS	FUS	intra-protein xl	370	362	0	40.44	0	Pellet	2
FUS:362:x:FUS:432	AGDWKCPNPTCENMNFSWR-AAIDWFDGKEFSGNPIK-a5-b9	FUS	FUS	intra-protein xl	432	362	0.44	43.52	0	Pellet	2
FUS:362:x:FUS:432	AGDWKCPNPTCENMNFSWR-AAIDWFDGKEFSGNPIK-a5-b9	FUS	FUS	intra-protein xl	432	362	0.49	42.31	0	Supernatant	3
FUS:362:x:FUS:453	NECNQCKAPKPDGPGGGPGGSHMGGNYGDDR-AAIDWFDGKEFSGNPIK-a7-b9	FUS	FUS	intra-protein xl	453	362	0.69	35.41	0	Supernatant	2
FUS:362:x:FUS:456	APKPDGPGGGPGGSHMGGNYGDDR-AAIDWFDGKEFSGNPIK-a3-b9	FUS	FUS	intra-protein xl	456	362	0	32.76	0	Supernatant	3
FUS:362:x:FUS:456	APKPDGPGGGPGGSHMGGNYGDDR-AAIDWFDGKEFSGNPIK-a3-b9	FUS	FUS	intra-protein xl	456	362	0.28	31.69	0	Pellet	2
FUS:362:x:FUS:515	AAIDWFDGKEFSGNPIK-GGFGPGKMDSR-a9-b7	FUS	FUS	intra-protein xl	362	515	0.39	47.93	0	Supernatant	3
FUS:362:x:FUS:515	AAIDWFDGKEFSGNPIK-GGFGPGKMDSR-a9-b7	FUS	FUS	intra-protein xl	362	515	0.44	47.39	0	Pellet	3
FUS:370:x:FUS:432	AGDWKCPNPTCENMNFSWR-EFSGNPIKVSFATR-a5-b8	FUS	FUS	intra-protein xl	432	370	0	32.89	0	Supernatant	2
FUS:370:x:FUS:453	NECNQCKAPKPDGPGGGPGGSHMGGNYGDDR-EFSGNPIKVSFATR-a7-b8	FUS	FUS	intra-protein xl	453	370	0.88	28.52	0.014	Pellet	2
FUS:370:x:FUS:453	NECNQCKAPKPDGPGGGPGGSHMGGNYGDDR-EFSGNPIKVSFATR-a7-b8	FUS	FUS	intra-protein xl	453	370	0.87	26.52	0.012	Supernatant	2
FUS:370:x:FUS:456	APKPDGPGGGPGGSHMGGNYGDDR-EFSGNPIKVSFATR-a3-b8	FUS	FUS	intra-protein xl	456	370	0	30.31	0	Supernatant	3
FUS:370:x:FUS:515	EFSGNPIKVSFATR-GGFGPGKMDSR-a8-b7	FUS	FUS	intra-protein xl	370	515	0	37.39	0	Pellet	2
FUS:370:x:FUS:515	EFSGNPIKVSFATR-GGFGPGKMDSR-a8-b7	FUS	FUS	intra-protein xl	370	515	0	31.96	0	Supernatant	3
FUS:432:x:FUS:453	NECNQCKAPKPDGPGGGPGGSHMGGNYGDDR-AGDWKCPNPTCENMNFSWR-a7-b5	FUS	FUS	intra-protein xl	453	432	0.76	41.58	0	Supernatant	3
FUS:432:x:FUS:456	APKPDGPGGGPGGSHMGGNYGDDR-AGDWKCPNPTCENMNFSWR-a3-b5	FUS	FUS	intra-protein xl	456	432	0	42.95	0	Supernatant	3
FUS:432:x:FUS:456	APKPDGPGGGPGGSHMGGNYGDDR-AGDWKCPNPTCENMNFSWR-a3-b5	FUS	FUS	intra-protein xl	456	432	0	39.63	0	Pellet	2
FUS:432:x:FUS:515	AGDWKCPNPTCENMNFSWR-GGFGPGKMDSR-a5-b7	FUS	FUS	intra-protein xl	432	515	0	45.12	0	Supernatant	3
FUS:432:x:FUS:515	AGDWKCPNPTCENMNFSWR-GGFGPGKMDSR-a5-b7	FUS	FUS	intra-protein xl	432	515	0	44.87	0	Pellet	2
FUS:453:x:FUS:515	NECNQCKAPKPDGPGGGPGGSHMGGNYGDDR-GGFGPGKMDSR-a7-b7	FUS	FUS	intra-protein xl	453	515	0.66	39.14	0	Supernatant	3
FUS:453:x:FUS:515	NECNQCKAPKPDGPGGGPGGSHMGGNYGDDR-GGFGPGKMDSR-a7-b7	FUS	FUS	intra-protein xl	453	515	0.64	37.83	0	Pellet	3
FUS:456:x:FUS:515	APKPDGPGGGPGGSHMGGNYGDDR-GGFGPGKMDSR-a3-b7	FUS	FUS	intra-protein xl	456	515	0	34.9	0	Supernatant	3
FUS:456:x:FUS:515	APKPDGPGGGPGGSHMGGNYGDDR-GGFGPGKMDSR-a3-b7	FUS	FUS	intra-protein xl	456	515	0.71	34.73	0	Pellet	2
Alpha-lactalbumin:112	FLDDDLTDDIMCVKK-K14-155	Alpha-lactalbumin	-	monolink	112		0.1	57.84	0	Supernatant	3
Alpha-lactalbumin:112	FLDDDLTDDIMCVKKILDK-K14-156	Alpha-lactalbumin	-	monolink	112		0.08	43.93	0	Pellet	3
Alpha-lactalbumin:113	FLDDDLTDDIMCVKK-K15-155	Alpha-lactalbumin	-	monolink	113		0.13	59.11	0	Supernatant	3
Alpha-lactalbumin:113	FLDDDLTDDIMCVKKILDK-K15-156	Alpha-lactalbumin	-	monolink	113		0.13	49.95	0	Pellet	3
Alpha-lactalbumin:117	KILDKVGINYWLAHK-K5-155	Alpha-lactalbumin	-	monolink	117		0.16	57.83	0	Pellet	3
Alpha-lactalbumin:117	KILDKVGINYWLAHK-K5-155	Alpha-lactalbumin	-	monolink	117		0	54.3	0	Supernatant	3
Alpha-lactalbumin:127	VGINYWLAHKALCSEKLDQWLCEK-K10-155	Alpha-lactalbumin	-	monolink	127		0.17	50.35	0	Pellet	3
Alpha-lactalbumin:127	VGINYWLAHKALCSEKLDQWLCEK-K10-156	Alpha-lactalbumin	-	monolink	127		0.1	45.85	0	Supernatant	3
Alpha-lactalbumin:133	ALCSEKLDQWLCEK-K6-156	Alpha-lactalbumin	-	monolink	133		0.09	55.8	0	Pellet	3
Alpha-lactalbumin:133	ALCSEKLDQWLCEK-K6-156	Alpha-lactalbumin	-	monolink	133		0	50.98	0	Supernatant	3
Alpha-lactalbumin:141	ALCSEKLDQWLCEK-K14-155	Alpha-lactalbumin	-	monolink	141		0.08	45.69	0	Pellet	3
Alpha-lactalbumin:141	ALCSEKLDQWLCEKL-K14-156	Alpha-lactalbumin	-	monolink	141		0	39.77	0	Supernatant	3
Alpha-lactalbumin:32	ELKDLKGYGGVSLPEWVCTTFHTSGYDTQAIVQNNDSTEYGLFQINNK-K3-156	Alpha-lactalbumin	-	monolink	32		0	33.12	0	Supernatant	3
Alpha-lactalbumin:35	DLKGYGGVSLPEWVCTTFHTSGYDTQAIVQNNDSTEYGLFQINNK-K3-156	Alpha-lactalbumin	-	monolink	35		0	44.51	0	Supernatant	3
Alpha-lactalbumin:35	DLKGYGGVSLPEWVCTTFHTSGYDTQAIVQNNDSTEYGLFQINNK-K3-156	Alpha-lactalbumin	-	monolink	35		0.18	36.52	0	Pellet	3
Alpha-lactalbumin:77	GYGGVSLPEWVCTTFHTSGYDTQAIVQNNDSTEYGLFQINNKIWCK-K42-155	Alpha-lactalbumin	-	monolink	77		0.08	32.08	0	Supernatant	3
Alpha-lactalbumin:81	IWCKDDQNPHSSNICNISCDK-K4-156	Alpha-lactalbumin	-	monolink	81		0.16	45.97	0	Supernatant	3
Alpha-lactalbumin:81	IWCKDDQNPHSSNICNISCDK-K4-155	Alpha-lactalbumin	-	monolink	81		0.21	43.95	0	Pellet	3
Alpha-lactalbumin:98	DDQNPHSSNICNISCDKFLDDDLTDDIMCVK-K17-156	Alpha-lactalbumin	-	monolink	98		0.25	53.85	0	Pellet	3
Alpha-lactalbumin:98	DDQNPHSSNICNISCDKFLDDDLTDDIMCVK-K17-156	Alpha-lactalbumin	-	monolink	98		0.14	53.67	0	Supernatant	3
FUS:311	HDSEQDNSDNNTIFVQGLGENVTIESVADYFKQIGIIK-K32-156	FUS	-	monolink	311		0	43.01	0	Supernatant	2
FUS:321	KTGQPMINLYTDRETGK-K1-155	FUS	-	monolink	321		0	40.35	0	Pellet	3
FUS:321	KTGQPMINLYTDRETGK-K1-155	FUS	-	monolink	321		0	34.94	0	Supernatant	3
FUS:337	ETGKLKGEATVSFDDPPSAK-K4-156	FUS	-	monolink	337		0	41.9	0	Pellet	3
FUS:337	ETGKLKGEATVSFDDPPSAK-K4-156	FUS	-	monolink	337		0	40.89	0	Supernatant	3
FUS:339	LKGEATVSFDDPPSAK-K2-156	FUS	-	monolink	339		0.12	49.03	0	Supernatant	3
FUS:339	LKGEATVSFDDPPSAK-K2-156	FUS	-	monolink	339		0.12	48.4	0	Pellet	3
FUS:353	LKGEATVSFDDPPSAKAAIDWFDGK-K16-156	FUS	-	monolink	353		0.05	42.44	0	Pellet	3
FUS:353	GEATVSFDDPPSAKAAIDWFDGK-K14-156	FUS	-	monolink	353		0.06	41.01	0	Supernatant	3
FUS:362	AAIDWFDGKEFSGNPIK-K9-155	FUS	-	monolink	362		0.14	55.58	0	Pellet	3
FUS:362	AAIDWFDGKEFSGNPIK-K9-155	FUS	-	monolink	362		0	51.84	0	Supernatant	3
FUS:370	AAIDWFDGKEFSGNPIKVSFATR-K17-156	FUS	-	monolink	370		0	49.3	0	Pellet	3
FUS:370	AAIDWFDGKEFSGNPIKVSFATR-K17-155	FUS	-	monolink	370		0	47.35	0	Supernatant	3
FUS:432	AGDWKCPNPTCENMNFSWR-K5-155	FUS	-	monolink	432		0	49.41	0	Pellet	3
FUS:432	AGDWKCPNPTCENMNFSWR-K5-156	FUS	-	monolink	432		0	45.37	0	Supernatant	3
FUS:453	NECNQCKAPKPDGPGGGPGGSHMGGNYGDDR-K7-155	FUS	-	monolink	453		0.26	39.52	0	Pellet	3
FUS:453	NECNQCKAPKPDGPGGGPGGSHMGGNYGDDR-K7-155	FUS	-	monolink	453		0.18	39.48	0	Supernatant	3
FUS:456	APKPDGPGGGPGGSHMGGNYGDDR-K3-155	FUS	-	monolink	456		0	40.48	0	Supernatant	3
FUS:456	APKPDGPGGGPGGSHMGGNYGDDR-K3-155	FUS	-	monolink	456		0	38.82	0	Pellet	3

## Sheet: Table S4
Supplemental Table 4. FUS-K9B8 Salt Experiment Crosslink Identification. Related to Figure S2G, S3G, 5B
Crosslinks were only considered, if they were identified in two out of three replicates with a deltaS < 0.95, a minimum Id score ≥ 20 and an ld score ≥ 25 in at least one replicate (filtering was done on the level of the unique Crosslinking site) and an FDR < 0.05 as calculated by xProphet for at least one replicate.
Only the highest scoring crosslink from three replicates is shown.
uxID	Id	Protein1	Protein2	XLType	AbsPos1	AbsPos2	deltaS	ld-Score	FDR	Salt Concentration	No of Ids in triplicates
FUS-K9::x:HspB8:	ZGPLGSMADGQMPFSCHYPSR-ZGPAAAMASK-a1-b1	HspB8	FUS-K9	inter-protein xl	1	1	0	38.33	0	75 mM KCl	3
FUS-K9::x:HspB8:	ZGPLGSMADGQMPFSCHYPSR-ZGPAAAMASK-a1-b1	HspB8	FUS-K9	inter-protein xl	1	1	0	37.02	0	500 mM KCl	3
FUS-K9::x:HspB8:102	TPPPFPGEPWKVCVNVHSFKPEELMVK-ZGPAAAMASK-a11-b1	HspB8	FUS-K9	inter-protein xl	102	1	0	26.22	0.01	75 mM KCl	3
FUS-K9::x:HspB8:111	VCVNVHSFKPEELMVK-ZGPAAAMASK-a9-b1	HspB8	FUS-K9	inter-protein xl	111	1	0.23	38.24	0	75 mM KCl	3
FUS-K9::x:HspB8:111	VCVNVHSFKPEELMVK-ZGPAAAMASK-a9-b1	HspB8	FUS-K9	inter-protein xl	111	1	0	34.1	0	500 mM KCl	2
FUS-K9::x:HspB8:118	VCVNVHSFKPEELMVKTK-ZGPAAAMASK-a16-b1	HspB8	FUS-K9	inter-protein xl	118	1	0	36.27	0	75 mM KCl	3
FUS-K9::x:HspB8:118	VCVNVHSFKPEELMVKTK-ZGPAAAMASK-a16-b1	HspB8	FUS-K9	inter-protein xl	118	1	0	33.04	0	500 mM KCl	2
FUS-K9::x:HspB8:120	TKDGYVEVSGKHEEK-ZGPAAAMASK-a2-b1	HspB8	FUS-K9	inter-protein xl	120	1	0	38.08	0	75 mM KCl	3
FUS-K9::x:HspB8:120	TKDGYVEVSGK-ZGPAAAMASK-a2-b1	HspB8	FUS-K9	inter-protein xl	120	1	0.51	33.54	0	500 mM KCl	3
FUS-K9::x:HspB8:129	DGYVEVSGKHEEK-ZGPAAAMASK-a9-b1	HspB8	FUS-K9	inter-protein xl	129	1	0	39.71	0	75 mM KCl	3
FUS-K9::x:HspB8:129	DGYVEVSGKHEEK-ZGPAAAMASK-a9-b1	HspB8	FUS-K9	inter-protein xl	129	1	0.41	36.86	0	500 mM KCl	3
FUS-K9::x:HspB8:133	HEEKQQEGGIVSK-ZGPAAAMASK-a4-b1	HspB8	FUS-K9	inter-protein xl	133	1	0	44.48	0	75 mM KCl	3
FUS-K9::x:HspB8:133	DGYVEVSGKHEEKQQEGGIVSK-ZGPAAAMASK-a13-b1	HspB8	FUS-K9	inter-protein xl	133	1	0	33.83	0	500 mM KCl	2
FUS-K9:106:x:HspB8:	ZGPLGSMADGQMPFSCHYPSR-SSQSSQSKSYGQQSK-a1-b8	HspB8	FUS-K9	inter-protein xl	1	106	0.6	34.95	0	75 mM KCl	3
FUS-K9:106:x:HspB8:120	SSQSSQSKSYGQQSK-TKDGYVEVSGK-a8-b2	FUS-K9	HspB8	inter-protein xl	106	120	0.53	31.17	0	75 mM KCl	2
FUS-K9:106:x:HspB8:129	SSQSSQSKSYGQQSK-DGYVEVSGKHEEK-a8-b9	FUS-K9	HspB8	inter-protein xl	106	129	0.77	43.4	0	75 mM KCl	3
FUS-K9:113:x:HspB8:	ZGPLGSMADGQMPFSCHYPSR-SYGQQSKSYPGYGK-a1-b7	HspB8	FUS-K9	inter-protein xl	1	113	0	34.29	0	75 mM KCl	3
FUS-K9:113:x:HspB8:111	VCVNVHSFKPEELMVK-SYGQQSKSYPGYGK-a9-b7	HspB8	FUS-K9	inter-protein xl	111	113	0	31.68	0	75 mM KCl	2
FUS-K9:113:x:HspB8:118	VCVNVHSFKPEELMVKTK-SYGQQSKSYPGYGK-a16-b7	HspB8	FUS-K9	inter-protein xl	118	113	0	29.33	0	75 mM KCl	2
FUS-K9:113:x:HspB8:120	SYGQQSKSYPGYGK-TKDGYVEVSGK-a7-b2	FUS-K9	HspB8	inter-protein xl	113	120	0.67	40.73	0	75 mM KCl	2
FUS-K9:113:x:HspB8:129	SYGQQSKSYPGYGK-DGYVEVSGKHEEK-a7-b9	FUS-K9	HspB8	inter-protein xl	113	129	0	33.2	0	75 mM KCl	3
FUS-K9:120:x:HspB8:129	SYPGYGKQQPAPSSTSK-DGYVEVSGKHEEK-a7-b9	FUS-K9	HspB8	inter-protein xl	120	129	0.37	35.39	0	75 mM KCl	3
FUS-K9:140:x:HspB8:	ZGPLGSMADGQMPFSCHYPSR-GSYGSSSQSKSSYGQPQSGK-a1-b10	HspB8	FUS-K9	inter-protein xl	1	140	0	37.3	0	75 mM KCl	3
FUS-K9:140:x:HspB8:111	GSYGSSSQSKSSYGQPQSGK-VCVNVHSFKPEELMVKTK-a10-b9	FUS-K9	HspB8	inter-protein xl	140	111	0.38	36.42	0	75 mM KCl	2
FUS-K9:140:x:HspB8:120	GSYGSSSQSKSSYGQPQSGK-TKDGYVEVSGK-a10-b2	FUS-K9	HspB8	inter-protein xl	140	120	0	37.3	0	75 mM KCl	2
FUS-K9:140:x:HspB8:129	GSYGSSSQSKSSYGQPQSGK-DGYVEVSGKHEEK-a10-b9	FUS-K9	HspB8	inter-protein xl	140	129	0.42	47.22	0	75 mM KCl	2
FUS-K9:140:x:HspB8:133	GSYGSSSQSKSSYGQPQSGK-HEEKQQEGGIVSK-a10-b4	FUS-K9	HspB8	inter-protein xl	140	133	0.37	35.28	0	75 mM KCl	3
FUS-K9:150:x:HspB8:	ZGPLGSMADGQMPFSCHYPSR-SSYGQPQSGKSYSQQPSYGK-a1-b10	HspB8	FUS-K9	inter-protein xl	1	150	0	34.98	0	75 mM KCl	3
FUS-K9:150:x:HspB8:129	SSYGQPQSGKSYSQQPSYGK-DGYVEVSGKHEEK-a10-b9	FUS-K9	HspB8	inter-protein xl	150	129	0	32.93	0	75 mM KCl	3
FUS-K9:16:x:HspB8:	ZGPLGSMADGQMPFSCHYPSR-NDYTQQKATQSYGK-a1-b7	HspB8	FUS-K9	inter-protein xl	1	16	0.45	32.44	0	75 mM KCl	2
FUS-K9:16:x:HspB8:129	NDYTQQKATQSYGK-DGYVEVSGKHEEK-a7-b9	FUS-K9	HspB8	inter-protein xl	16	129	0.56	40.41	0	75 mM KCl	3
FUS-K9:160:x:HspB8:	ZGPLGSMADGQMPFSCHYPSR-SYSQQPSYGKGQQQSYGK-a1-b10	HspB8	FUS-K9	inter-protein xl	1	160	0.39	27.89	0	75 mM KCl	3
FUS-K9:160:x:HspB8:120	SYSQQPSYGKGQQQSYGK-TKDGYVEVSGK-a10-b2	FUS-K9	HspB8	inter-protein xl	160	120	0.45	28.51	0	75 mM KCl	3
FUS-K9:160:x:HspB8:129	SYSQQPSYGKGQQQSYGK-DGYVEVSGKHEEK-a10-b9	FUS-K9	HspB8	inter-protein xl	160	129	0.82	27.97	0	75 mM KCl	2
FUS-K9:168:x:HspB8:	ZGPLGSMADGQMPFSCHYPSR-GQQQSYGKQQQSYNPPQK-a1-b8	HspB8	FUS-K9	inter-protein xl	1	168	0.11	34.06	0	75 mM KCl	3
FUS-K9:168:x:HspB8:	ZGPLGSMADGQMPFSCHYPSR-GQQQSYGKQQQSYNPPQK-a1-b8	HspB8	FUS-K9	inter-protein xl	1	168	0	26.95	0	500 mM KCl	2
FUS-K9:168:x:HspB8:129	GQQQSYGKQQQSYNPPQK-DGYVEVSGKHEEK-a8-b9	FUS-K9	HspB8	inter-protein xl	168	129	0	31.29	0	75 mM KCl	2
FUS-K9:188:x:HspB8:129	GYEQQNQYNKSSSGGGGGGK-DGYVEVSGKHEEK-a10-b9	FUS-K9	HspB8	inter-protein xl	188	129	0.65	43.33	0	75 mM KCl	3
FUS-K9:188:x:HspB8:133	GYEQQNQYNKSSSGGGGGGK-HEEKQQEGGIVSK-a10-b4	FUS-K9	HspB8	inter-protein xl	188	133	0.8	32.31	0	75 mM KCl	3
FUS-K9:198:x:HspB8:	ZGPLGSMADGQMPFSCHYPSR-SSSGGGGGGKGGGGNYGK-a1-b10	HspB8	FUS-K9	inter-protein xl	1	198	0	38.39	0	75 mM KCl	3
FUS-K9:198:x:HspB8:120	SSSGGGGGGKGGGGNYGK-TKDGYVEVSGK-a10-b2	FUS-K9	HspB8	inter-protein xl	198	120	0.5	39.3	0	75 mM KCl	3
FUS-K9:198:x:HspB8:120	SSSGGGGGGKGGGGNYGK-TKDGYVEVSGK-a10-b2	FUS-K9	HspB8	inter-protein xl	198	120	0.47	31.05	0	500 mM KCl	2
FUS-K9:198:x:HspB8:129	SSSGGGGGGKGGGGNYGK-DGYVEVSGKHEEK-a10-b9	FUS-K9	HspB8	inter-protein xl	198	129	0	38.2	0	75 mM KCl	3
FUS-K9:206:x:HspB8:	ZGPLGSMADGQMPFSCHYPSR-GGGGNYGKQDQSSMSSGK-a1-b8	HspB8	FUS-K9	inter-protein xl	1	206	0	39.36	0	75 mM KCl	3
FUS-K9:206:x:HspB8:133	GGGGNYGKQDQSSMSSGK-HEEKQQEGGIVSK-a8-b4	FUS-K9	HspB8	inter-protein xl	206	133	0	25.57	0.01	75 mM KCl	2
FUS-K9:216:x:HspB8:	ZGPLGSMADGQMPFSCHYPSR-QDQSSMSSGKGGSGGGYGK-a1-b10	HspB8	FUS-K9	inter-protein xl	1	216	0.6	31.09	0	75 mM KCl	3
FUS-K9:225:x:HspB8:	ZGPLGSMADGQMPFSCHYPSR-GGSGGGYGKNQDQSGGGGK-a1-b9	HspB8	FUS-K9	inter-protein xl	1	225	0.65	39.91	0	75 mM KCl	3
FUS-K9:225:x:HspB8:129	GGSGGGYGKNQDQSGGGGK-DGYVEVSGKHEEK-a9-b9	FUS-K9	HspB8	inter-protein xl	225	129	0.92	29.73	0	75 mM KCl	2
FUS-K9:225:x:HspB8:133	GGSGGGYGKNQDQSGGGGK-HEEKQQEGGIVSK-a9-b4	FUS-K9	HspB8	inter-protein xl	225	133	0.9	32.41	0	75 mM KCl	2
FUS-K9:23:x:HspB8:	ZGPLGSMADGQMPFSCHYPSR-ATQSYGKAYPTQPGQK-a1-b7	HspB8	FUS-K9	inter-protein xl	1	23	0	27.73	0	75 mM KCl	3
FUS-K9:23:x:HspB8:	ZGPLGSMADGQMPFSCHYPSR-ATQSYGKAYPTQPGQK-a1-b7	HspB8	FUS-K9	inter-protein xl	1	23	0	25.84	0	500 mM KCl	2
FUS-K9:23:x:HspB8:111	ATQSYGKAYPTQPGQK-VCVNVHSFKPEELMVK-a7-b9	FUS-K9	HspB8	inter-protein xl	23	111	0	26.29	0.01	75 mM KCl	2
FUS-K9:23:x:HspB8:120	ATQSYGKAYPTQPGQK-TKDGYVEVSGK-a7-b2	FUS-K9	HspB8	inter-protein xl	23	120	0.55	33.52	0	75 mM KCl	2
FUS-K9:23:x:HspB8:129	ATQSYGKAYPTQPGQK-DGYVEVSGKHEEK-a7-b9	FUS-K9	HspB8	inter-protein xl	23	129	0.83	30.19	0	75 mM KCl	2
FUS-K9:23:x:HspB8:133	DGYVEVSGKHEEKQQEGGIVSK-ATQSYGKAYPTQPGQK-a13-b7	HspB8	FUS-K9	inter-protein xl	133	23	0.74	27.85	0	75 mM KCl	2
FUS-K9:235:x:HspB8:120	NQDQSGGGGKSGGYGQQASDR-TKDGYVEVSGK-a10-b2	FUS-K9	HspB8	inter-protein xl	235	120	0.78	40.68	0	75 mM KCl	3
FUS-K9:235:x:HspB8:120	NQDQSGGGGKSGGYGQQASDR-TKDGYVEVSGK-a10-b2	FUS-K9	HspB8	inter-protein xl	235	120	0.76	37.92	0	500 mM KCl	2
FUS-K9:297:x:HspB8:	ZGPLGSMADGQMPFSCHYPSR-GGFNKFGGPR-a1-b5	HspB8	FUS-K9	inter-protein xl	1	297	0	29.8	0	75 mM KCl	2
FUS-K9:32:x:HspB8:120	AYPTQPGQKGYSQQSSK-TKDGYVEVSGK-a9-b2	FUS-K9	HspB8	inter-protein xl	32	120	0.66	28.09	0	75 mM KCl	3
FUS-K9:349:x:HspB8:	ZGPLGSMADGQMPFSCHYPSR-KTGQPMINLYTDR-a1-b1	HspB8	FUS-K9	inter-protein xl	1	349	0.06	31.7	0	500 mM KCl	2
FUS-K9:349:x:HspB8:	ZGPLGSMADGQMPFSCHYPSR-KTGQPMINLYTDR-a1-b1	HspB8	FUS-K9	inter-protein xl	1	349	0.17	29.36	0	75 mM KCl	3
FUS-K9:349:x:HspB8:129	DGYVEVSGKHEEK-KTGQPMINLYTDR-a9-b1	HspB8	FUS-K9	inter-protein xl	129	349	0	29.12	0	75 mM KCl	3
FUS-K9:349:x:HspB8:133	HEEKQQEGGIVSK-KTGQPMINLYTDR-a4-b1	HspB8	FUS-K9	inter-protein xl	133	349	0	28.23	0	75 mM KCl	2
FUS-K9:365:x:HspB8:120	TKDGYVEVSGK-ETGKLK-a2-b4	HspB8	FUS-K9	inter-protein xl	120	365	0	33.03	0	75 mM KCl	3
FUS-K9:367:x:HspB8:	ZGPLGSMADGQMPFSCHYPSR-LKGEATVSFDDPPSAK-a1-b2	HspB8	FUS-K9	inter-protein xl	1	367	0.13	37.77	0	75 mM KCl	3
FUS-K9:367:x:HspB8:	ZGPLGSMADGQMPFSCHYPSR-LKGEATVSFDDPPSAK-a1-b2	HspB8	FUS-K9	inter-protein xl	1	367	0.21	31.47	0	500 mM KCl	3
FUS-K9:367:x:HspB8:120	LKGEATVSFDDPPSAK-TKDGYVEVSGK-a2-b2	FUS-K9	HspB8	inter-protein xl	367	120	0	41.51	0	75 mM KCl	3
FUS-K9:367:x:HspB8:133	LKGEATVSFDDPPSAK-HEEKQQEGGIVSK-a2-b4	FUS-K9	HspB8	inter-protein xl	367	133	0.94	33.8	0	75 mM KCl	3
FUS-K9:390:x:HspB8:	ZGPLGSMADGQMPFSCHYPSR-AAIDWFDGKEFSGNPIK-a1-b9	HspB8	FUS-K9	inter-protein xl	1	390	0	41.35	0	500 mM KCl	3
FUS-K9:390:x:HspB8:	ZGPLGSMADGQMPFSCHYPSR-AAIDWFDGKEFSGNPIK-a1-b9	HspB8	FUS-K9	inter-protein xl	1	390	0	40.74	0	75 mM KCl	3
FUS-K9:390:x:HspB8:111	AAIDWFDGKEFSGNPIK-VCVNVHSFKPEELMVK-a9-b9	FUS-K9	HspB8	inter-protein xl	390	111	0.31	27.71	0	75 mM KCl	2
FUS-K9:390:x:HspB8:120	AAIDWFDGKEFSGNPIK-TKDGYVEVSGK-a9-b2	FUS-K9	HspB8	inter-protein xl	390	120	0.12	37.47	0	75 mM KCl	2
FUS-K9:390:x:HspB8:142	AAIDWFDGKEFSGNPIK-HEEKQQEGGIVSKNFTK-a9-b13	FUS-K9	HspB8	inter-protein xl	390	142	0	25.35	0.01	75 mM KCl	3
FUS-K9:398:x:HspB8:	ZGPLGSMADGQMPFSCHYPSR-EFSGNPIKVSFATR-a1-b8	HspB8	FUS-K9	inter-protein xl	1	398	0	32.21	0	75 mM KCl	3
FUS-K9:398:x:HspB8:	ZGPLGSMADGQMPFSCHYPSR-EFSGNPIKVSFATR-a1-b8	HspB8	FUS-K9	inter-protein xl	1	398	0	25.5	0.043	500 mM KCl	2
FUS-K9:398:x:HspB8:111	VCVNVHSFKPEELMVKTK-EFSGNPIKVSFATR-a9-b8	HspB8	FUS-K9	inter-protein xl	111	398	0	32.49	0	75 mM KCl	3
FUS-K9:398:x:HspB8:118	VCVNVHSFKPEELMVKTK-EFSGNPIKVSFATR-a16-b8	HspB8	FUS-K9	inter-protein xl	118	398	0	27.71	0	75 mM KCl	3
FUS-K9:398:x:HspB8:120	EFSGNPIKVSFATR-TKDGYVEVSGK-a8-b2	FUS-K9	HspB8	inter-protein xl	398	120	0	37.97	0	75 mM KCl	3
FUS-K9:398:x:HspB8:129	EFSGNPIKVSFATR-DGYVEVSGKHEEK-a8-b9	FUS-K9	HspB8	inter-protein xl	398	129	0	26.37	0.01	75 mM KCl	2
FUS-K9:40:x:HspB8:	ZGPLGSMADGQMPFSCHYPSR-GYSQQSSKQPYGQQSYSK-a1-b8	HspB8	FUS-K9	inter-protein xl	1	40	0.49	29.44	0	75 mM KCl	3
FUS-K9:40:x:HspB8:120	GYSQQSSKQPYGQQSYSK-TKDGYVEVSGK-a8-b2	FUS-K9	HspB8	inter-protein xl	40	120	0.73	26.23	0.01	75 mM KCl	2
FUS-K9:40:x:HspB8:129	GYSQQSSKQPYGQQSYSK-DGYVEVSGKHEEK-a8-b9	FUS-K9	HspB8	inter-protein xl	40	129	0.48	34.49	0	75 mM KCl	2
FUS-K9:40:x:HspB8:133	GYSQQSSKQPYGQQSYSK-HEEKQQEGGIVSK-a8-b4	FUS-K9	HspB8	inter-protein xl	40	133	0.28	31.87	0	75 mM KCl	2
FUS-K9:484:x:HspB8:	APKPDGPGGGPGGSHMGGNYGDDR-ZGPLGSMADGQMPFSCHYPSR-a3-b1	FUS-K9	HspB8	inter-protein xl	484	1	0.28	28.71	0	75 mM KCl	3
FUS-K9:50:x:HspB8:	ZGPLGSMADGQMPFSCHYPSR-QPYGQQSYSKGYSQSTDTSK-a1-b10	HspB8	FUS-K9	inter-protein xl	1	50	0	28.47	0	75 mM KCl	2
FUS-K9:50:x:HspB8:129	QPYGQQSYSKGYSQSTDTSK-DGYVEVSGKHEEK-a10-b9	FUS-K9	HspB8	inter-protein xl	50	129	0.15	28.11	0	75 mM KCl	2
FUS-K9:543:x:HspB8:	ZGPLGSMADGQMPFSCHYPSR-GGFGPGKMDSR-a1-b7	HspB8	FUS-K9	inter-protein xl	1	543	0	36.94	0	75 mM KCl	3
FUS-K9:543:x:HspB8:102	TPPPFPGEPWKVCVNVHSFKPEELMVK-GGFGPGKMDSR-a11-b7	HspB8	FUS-K9	inter-protein xl	102	543	0	32.34	0	75 mM KCl	2
FUS-K9:543:x:HspB8:111	VCVNVHSFKPEELMVK-GGFGPGKMDSR-a9-b7	HspB8	FUS-K9	inter-protein xl	111	543	0	39.1	0	500 mM KCl	2
FUS-K9:543:x:HspB8:111	VCVNVHSFKPEELMVK-GGFGPGKMDSR-a9-b7	HspB8	FUS-K9	inter-protein xl	111	543	0	37.13	0	75 mM KCl	3
FUS-K9:543:x:HspB8:118	VCVNVHSFKPEELMVKTK-GGFGPGKMDSR-a16-b7	HspB8	FUS-K9	inter-protein xl	118	543	0.59	29.47	0	75 mM KCl	3
FUS-K9:543:x:HspB8:120	GGFGPGKMDSR-TKDGYVEVSGK-a7-b2	FUS-K9	HspB8	inter-protein xl	543	120	0.69	37.71	0	75 mM KCl	2
FUS-K9:543:x:HspB8:129	DGYVEVSGKHEEK-GGFGPGKMDSR-a9-b7	HspB8	FUS-K9	inter-protein xl	129	543	0.65	35.63	0	75 mM KCl	3
FUS-K9:543:x:HspB8:129	DGYVEVSGKHEEK-GGFGPGKMDSR-a9-b7	HspB8	FUS-K9	inter-protein xl	129	543	0.49	35.09	0	500 mM KCl	2
FUS-K9:543:x:HspB8:133	HEEKQQEGGIVSK-GGFGPGKMDSR-a4-b7	HspB8	FUS-K9	inter-protein xl	133	543	0.58	38.45	0	75 mM KCl	3
FUS-K9:543:x:HspB8:133	HEEKQQEGGIVSK-GGFGPGKMDSR-a4-b7	HspB8	FUS-K9	inter-protein xl	133	543	0.4	33.67	0	500 mM KCl	2
FUS-K9:60:x:HspB8:	ZGPLGSMADGQMPFSCHYPSR-GYSQSTDTSKGYGQSSYSK-a1-b10	HspB8	FUS-K9	inter-protein xl	1	60	0	34.89	0	75 mM KCl	2
FUS-K9:69:x:HspB8:	ZGPLGSMADGQMPFSCHYPSR-GYGQSSYSKSYGQSQNTK-a1-b9	HspB8	FUS-K9	inter-protein xl	1	69	0	38.93	0	75 mM KCl	3
FUS-K9:69:x:HspB8:	ZGPLGSMADGQMPFSCHYPSR-GYGQSSYSKSYGQSQNTK-a1-b9	HspB8	FUS-K9	inter-protein xl	1	69	0	32.02	0	500 mM KCl	2
FUS-K9:69:x:HspB8:129	GYGQSSYSKSYGQSQNTK-DGYVEVSGKHEEK-a9-b9	FUS-K9	HspB8	inter-protein xl	69	129	0.6	39.37	0	75 mM KCl	3
FUS-K9:78:x:HspB8:	ZGPLGSMADGQMPFSCHYPSR-SYGQSQNTKGYGTQSTPQK-a1-b9	HspB8	FUS-K9	inter-protein xl	1	78	0	43.73	0	75 mM KCl	3
FUS-K9:78:x:HspB8:118	SYGQSQNTKGYGTQSTPQK-VCVNVHSFKPEELMVKTK-a9-b16	FUS-K9	HspB8	inter-protein xl	78	118	0	29.7	0	75 mM KCl	3
FUS-K9:78:x:HspB8:120	SYGQSQNTKGYGTQSTPQK-TKDGYVEVSGKHEEK-a9-b2	FUS-K9	HspB8	inter-protein xl	78	120	0.89	36.82	0	75 mM KCl	3
FUS-K9:78:x:HspB8:133	SYGQSQNTKGYGTQSTPQK-HEEKQQEGGIVSK-a9-b4	FUS-K9	HspB8	inter-protein xl	78	133	0.42	39.66	0	75 mM KCl	3
FUS-K9:88:x:HspB8:	ZGPLGSMADGQMPFSCHYPSR-GYGTQSTPQKGYGSTGGYGK-a1-b10	HspB8	FUS-K9	inter-protein xl	1	88	0	29	0	75 mM KCl	3
FUS-K9:88:x:HspB8:129	GYGTQSTPQKGYGSTGGYGK-DGYVEVSGKHEEK-a10-b9	FUS-K9	HspB8	inter-protein xl	88	129	0.87	28.1	0	75 mM KCl	3
FUS-K9:98:x:HspB8:	ZGPLGSMADGQMPFSCHYPSR-GYGSTGGYGKSSQSSQSK-a1-b10	HspB8	FUS-K9	inter-protein xl	1	98	0.47	39.27	0	75 mM KCl	3
FUS-K9:98:x:HspB8:118	GYGSTGGYGKSSQSSQSK-VCVNVHSFKPEELMVKTK-a10-b16	FUS-K9	HspB8	inter-protein xl	98	118	0.48	31.45	0	75 mM KCl	3
FUS-K9:98:x:HspB8:129	GYGSTGGYGKSSQSSQSK-DGYVEVSGKHEEK-a10-b9	FUS-K9	HspB8	inter-protein xl	98	129	0.51	41.27	0	75 mM KCl	3
FUS-K9:98:x:HspB8:133	GYGSTGGYGKSSQSSQSK-HEEKQQEGGIVSK-a10-b4	FUS-K9	HspB8	inter-protein xl	98	133	0.27	29.88	0	75 mM KCl	3
FUS-K9:106:x:FUS-K9:113	SSQSSQSKSYGQQSKSYPGYGK-K8-K15	FUS-K9	-	looplink	106	113	0	37.97	0	75 mM KCl	3
FUS-K9:106:x:FUS-K9:113	SSQSSQSKSYGQQSKSYPGYGK-K8-K15	FUS-K9	-	looplink	106	113	0	33.62	0	500 mM KCl	3
FUS-K9:106:x:FUS-K9:98	GYGSTGGYGKSSQSSQSKSYGQQSK-K10-K18	FUS-K9	-	looplink	98	106	0.16	40.34	0	75 mM KCl	3
FUS-K9:106:x:FUS-K9:98	GYGSTGGYGKSSQSSQSKSYGQQSK-K10-K18	FUS-K9	-	looplink	98	106	0.31	36.2	0	500 mM KCl	3
FUS-K9:113:x:FUS-K9:120	SYGQQSKSYPGYGKQQPAPSSTSK-K7-K14	FUS-K9	-	looplink	113	120	0.12	38.44	0	75 mM KCl	3
FUS-K9:113:x:FUS-K9:120	SYGQQSKSYPGYGKQQPAPSSTSK-K7-K14	FUS-K9	-	looplink	113	120	0	37.09	0	500 mM KCl	3
FUS-K9:120:x:FUS-K9:130	SYPGYGKQQPAPSSTSKGSYGSSSQSK-K7-K17	FUS-K9	-	looplink	120	130	0.18	40.67	0	75 mM KCl	3
FUS-K9:120:x:FUS-K9:130	SYPGYGKQQPAPSSTSKGSYGSSSQSK-K7-K17	FUS-K9	-	looplink	120	130	0.08	33.93	0	500 mM KCl	3
FUS-K9:130:x:FUS-K9:140	QQPAPSSTSKGSYGSSSQSKSSYGQPQSGK-K10-K20	FUS-K9	-	looplink	130	140	0	41.16	0	500 mM KCl	3
FUS-K9:130:x:FUS-K9:140	QQPAPSSTSKGSYGSSSQSKSSYGQPQSGK-K10-K20	FUS-K9	-	looplink	130	140	0	37.73	0	75 mM KCl	3
FUS-K9:140:x:FUS-K9:150	GSYGSSSQSKSSYGQPQSGKSYSQQPSYGK-K10-K20	FUS-K9	-	looplink	140	150	0	34.72	0	500 mM KCl	2
FUS-K9:140:x:FUS-K9:150	GSYGSSSQSKSSYGQPQSGKSYSQQPSYGK-K10-K20	FUS-K9	-	looplink	140	150	0	33.21	0	75 mM KCl	3
FUS-K9:150:x:FUS-K9:160	SSYGQPQSGKSYSQQPSYGKGQQQSYGK-K10-K20	FUS-K9	-	looplink	150	160	0.16	33.97	0	500 mM KCl	3
FUS-K9:150:x:FUS-K9:160	SSYGQPQSGKSYSQQPSYGKGQQQSYGK-K10-K20	FUS-K9	-	looplink	150	160	0.2	33.94	0	75 mM KCl	3
FUS-K9:16:x:FUS-K9:23	NDYTQQKATQSYGKAYPTQPGQK-K7-K14	FUS-K9	-	looplink	16	23	0.07	36.49	0	500 mM KCl	3
FUS-K9:16:x:FUS-K9:23	NDYTQQKATQSYGKAYPTQPGQK-K7-K14	FUS-K9	-	looplink	16	23	0.06	34.09	0	75 mM KCl	3
FUS-K9:160:x:FUS-K9:168	SYSQQPSYGKGQQQSYGKQQQSYNPPQK-K10-K18	FUS-K9	-	looplink	160	168	0.2	41.8	0	500 mM KCl	3
FUS-K9:160:x:FUS-K9:168	SYSQQPSYGKGQQQSYGKQQQSYNPPQK-K10-K18	FUS-K9	-	looplink	160	168	0	39.45	0	75 mM KCl	3
FUS-K9:178:x:FUS-K9:188	QQQSYNPPQKGYEQQNQYNKSSSGGGGGGK-K10-K20	FUS-K9	-	looplink	178	188	0.18	32.16	0	500 mM KCl	3
FUS-K9:188:x:FUS-K9:198	GYEQQNQYNKSSSGGGGGGKGGGGNYGK-K10-K20	FUS-K9	-	looplink	188	198	0.17	45.07	0	75 mM KCl	3
FUS-K9:188:x:FUS-K9:198	GYEQQNQYNKSSSGGGGGGKGGGGNYGK-K10-K20	FUS-K9	-	looplink	188	198	0.17	43.42	0	500 mM KCl	3
FUS-K9:198:x:FUS-K9:206	SSSGGGGGGKGGGGNYGKQDQSSMSSGK-K10-K18	FUS-K9	-	looplink	198	206	0.14	46.46	0	75 mM KCl	3
FUS-K9:198:x:FUS-K9:206	SSSGGGGGGKGGGGNYGKQDQSSMSSGK-K10-K18	FUS-K9	-	looplink	198	206	0.2	43.64	0	500 mM KCl	3
FUS-K9:206:x:FUS-K9:216	GGGGNYGKQDQSSMSSGKGGSGGGYGK-K8-K18	FUS-K9	-	looplink	206	216	0.23	35.75	0	500 mM KCl	3
FUS-K9:206:x:FUS-K9:216	GGGGNYGKQDQSSMSSGKGGSGGGYGK-K8-K18	FUS-K9	-	looplink	206	216	0.2	35.64	0	75 mM KCl	3
FUS-K9:216:x:FUS-K9:225	QDQSSMSSGKGGSGGGYGKNQDQSGGGGK-K10-K19	FUS-K9	-	looplink	216	225	0.1	40.86	0	500 mM KCl	3
FUS-K9:216:x:FUS-K9:225	QDQSSMSSGKGGSGGGYGKNQDQSGGGGK-K10-K19	FUS-K9	-	looplink	216	225	0.12	39.55	0	75 mM KCl	3
FUS-K9:225:x:FUS-K9:235	GGSGGGYGKNQDQSGGGGKSGGYGQQASDR-K9-K19	FUS-K9	-	looplink	225	235	0	46.3	0	75 mM KCl	3
FUS-K9:225:x:FUS-K9:235	GGSGGGYGKNQDQSGGGGKSGGYGQQASDR-K9-K19	FUS-K9	-	looplink	225	235	0	42.56	0	500 mM KCl	3
FUS-K9:23:x:FUS-K9:32	ATQSYGKAYPTQPGQKGYSQQSSK-K7-K16	FUS-K9	-	looplink	23	32	0.13	33.5	0	75 mM KCl	3
FUS-K9:23:x:FUS-K9:32	ATQSYGKAYPTQPGQKGYSQQSSK-K7-K16	FUS-K9	-	looplink	23	32	0.21	33.28	0	500 mM KCl	3
FUS-K9:32:x:FUS-K9:40	AYPTQPGQKGYSQQSSKQPYGQQSYSK-K9-K17	FUS-K9	-	looplink	32	40	0.13	34.91	0	75 mM KCl	3
FUS-K9:32:x:FUS-K9:40	AYPTQPGQKGYSQQSSKQPYGQQSYSK-K9-K17	FUS-K9	-	looplink	32	40	0.12	33.85	0	500 mM KCl	3
FUS-K9:345:x:FUS-K9:348	QIGIIKTNKK-K6-K9	FUS-K9	-	looplink	345	348	0	33.12	0	500 mM KCl	3
FUS-K9:345:x:FUS-K9:348	QIGIIKTNKK-K6-K9	FUS-K9	-	looplink	345	348	0	29.48	0	75 mM KCl	2
FUS-K9:348:x:FUS-K9:349	TNKKTGQPMINLYTDR-K3-K4	FUS-K9	-	looplink	348	349	0	38.44	0	500 mM KCl	3
FUS-K9:365:x:FUS-K9:367	ETGKLKGEATVSFDDPPSAK-K4-K6	FUS-K9	-	looplink	365	367	0	39.9	0	500 mM KCl	3
FUS-K9:365:x:FUS-K9:367	ETGKLKGEATVSFDDPPSAK-K4-K6	FUS-K9	-	looplink	365	367	0	35.92	0	75 mM KCl	3
FUS-K9:381:x:FUS-K9:390	GEATVSFDDPPSAKAAIDWFDGKEFSGNPIK-K14-K23	FUS-K9	-	looplink	381	390	0.19	35.07	0	500 mM KCl	3
FUS-K9:381:x:FUS-K9:390	GEATVSFDDPPSAKAAIDWFDGKEFSGNPIK-K14-K23	FUS-K9	-	looplink	381	390	0.15	34.19	0	75 mM KCl	3
FUS-K9:390:x:FUS-K9:398	AAIDWFDGKEFSGNPIKVSFATR-K9-K17	FUS-K9	-	looplink	390	398	0.09	41.57	0	75 mM KCl	3
FUS-K9:390:x:FUS-K9:398	AAIDWFDGKEFSGNPIKVSFATR-K9-K17	FUS-K9	-	looplink	390	398	0	40.13	0	500 mM KCl	3
FUS-K9:40:x:FUS-K9:50	GYSQQSSKQPYGQQSYSKGYSQSTDTSK-K8-K18	FUS-K9	-	looplink	40	50	0	41.18	0	500 mM KCl	2
FUS-K9:40:x:FUS-K9:50	GYSQQSSKQPYGQQSYSKGYSQSTDTSK-K8-K18	FUS-K9	-	looplink	40	50	0	37.07	0	75 mM KCl	3
FUS-K9:481:x:FUS-K9:484	NECNQCKAPKPDGPGGGPGGSHMGGNYGDDR-K7-K10	FUS-K9	-	looplink	481	484	0.04	32.72	0	500 mM KCl	3
FUS-K9:481:x:FUS-K9:484	NECNQCKAPKPDGPGGGPGGSHMGGNYGDDRR-K7-K10	FUS-K9	-	looplink	481	484	0	31.93	0	75 mM KCl	3
FUS-K9:50:x:FUS-K9:60	QPYGQQSYSKGYSQSTDTSKGYGQSSYSK-K10-K20	FUS-K9	-	looplink	50	60	0.11	40.48	0	500 mM KCl	3
FUS-K9:50:x:FUS-K9:60	QPYGQQSYSKGYSQSTDTSKGYGQSSYSK-K10-K20	FUS-K9	-	looplink	50	60	0.11	40.25	0	75 mM KCl	3
FUS-K9:60:x:FUS-K9:69	GYSQSTDTSKGYGQSSYSKSYGQSQNTK-K10-K19	FUS-K9	-	looplink	60	69	0.09	41.76	0	500 mM KCl	2
FUS-K9:60:x:FUS-K9:69	GYSQSTDTSKGYGQSSYSKSYGQSQNTK-K10-K19	FUS-K9	-	looplink	60	69	0.08	40.4	0	75 mM KCl	2
FUS-K9:69:x:FUS-K9:78	GYGQSSYSKSYGQSQNTKGYGTQSTPQK-K9-K18	FUS-K9	-	looplink	69	78	0.08	45.09	0	500 mM KCl	3
FUS-K9:69:x:FUS-K9:78	GYGQSSYSKSYGQSQNTKGYGTQSTPQK-K9-K18	FUS-K9	-	looplink	69	78	0.04	42.1	0	75 mM KCl	3
FUS-K9:78:x:FUS-K9:88	SYGQSQNTKGYGTQSTPQKGYGSTGGYGK-K9-K19	FUS-K9	-	looplink	78	88	0.22	34.78	0	500 mM KCl	3
FUS-K9:78:x:FUS-K9:88	SYGQSQNTKGYGTQSTPQKGYGSTGGYGK-K9-K19	FUS-K9	-	looplink	78	88	0.17	32.01	0	75 mM KCl	3
FUS-K9:88:x:FUS-K9:98	GYGTQSTPQKGYGSTGGYGKSSQSSQSK-K10-K20	FUS-K9	-	looplink	88	98	0.02	35.04	0	75 mM KCl	3
FUS-K9:88:x:FUS-K9:98	GYGTQSTPQKGYGSTGGYGKSSQSSQSK-K10-K20	FUS-K9	-	looplink	88	98	0.03	33.59	0	500 mM KCl	3
HspB8:102:x:HspB8:111	TPPPFPGEPWKVCVNVHSFKPEELMVK-K11-K20	HspB8	-	looplink	102	111	0	28.14	0	75 mM KCl	3
HspB8:102:x:HspB8:111	TPPPFPGEPWKVCVNVHSFKPEELMVK-K11-K20	HspB8	-	looplink	102	111	0	27.29	0	500 mM KCl	3
HspB8:102:x:HspB8:118	TPPPFPGEPWKVCVNVHSFKPEELMVK-K11-K27	HspB8	-	looplink	102	118	0	33.31	0	75 mM KCl	3
HspB8:102:x:HspB8:118	TPPPFPGEPWKVCVNVHSFKPEELMVK-K11-K27	HspB8	-	looplink	102	118	0	31.65	0	500 mM KCl	3
HspB8:111:x:HspB8:118	VCVNVHSFKPEELMVKTK-K9-K16	HspB8	-	looplink	111	118	0	37.03	0	75 mM KCl	3
HspB8:111:x:HspB8:118	VCVNVHSFKPEELMVKTK-K9-K16	HspB8	-	looplink	111	118	0	34.62	0	500 mM KCl	3
HspB8:111:x:HspB8:120	VCVNVHSFKPEELMVKTK-K9-K18	HspB8	-	looplink	111	120	0	29.56	0	75 mM KCl	2
HspB8:111:x:HspB8:120	VCVNVHSFKPEELMVKTKDGYVEVSGK-K9-K18	HspB8	-	looplink	111	120	0	28.32	0	500 mM KCl	3
HspB8:118:x:HspB8:120	VCVNVHSFKPEELMVKTKDGYVEVSGK-K16-K18	HspB8	-	looplink	118	120	0	52.72	0	75 mM KCl	3
HspB8:118:x:HspB8:120	VCVNVHSFKPEELMVKTKDGYVEVSGK-K16-K18	HspB8	-	looplink	118	120	0	49.15	0	500 mM KCl	3
HspB8:120:x:HspB8:129	TKDGYVEVSGKHEEK-K2-K11	HspB8	-	looplink	120	129	0.3	30.56	0	75 mM KCl	3
HspB8:120:x:HspB8:129	TKDGYVEVSGKHEEK-K2-K11	HspB8	-	looplink	120	129	0	26.63	0	500 mM KCl	3
HspB8:129:x:HspB8:133	DGYVEVSGKHEEKQQEGGIVSK-K9-K13	HspB8	-	looplink	129	133	0	48.08	0	500 mM KCl	3
HspB8:129:x:HspB8:133	DGYVEVSGKHEEKQQEGGIVSK-K9-K13	HspB8	-	looplink	129	133	0.14	46.64	0	75 mM KCl	3
HspB8:129:x:HspB8:142	DGYVEVSGKHEEKQQEGGIVSK-K9-K22	HspB8	-	looplink	129	142	0.22	37.36	0	500 mM KCl	3
HspB8:129:x:HspB8:142	DGYVEVSGKHEEKQQEGGIVSK-K9-K22	HspB8	-	looplink	129	142	0.11	36.54	0	75 mM KCl	3
HspB8:133:x:HspB8:142	DGYVEVSGKHEEKQQEGGIVSK-K13-K22	HspB8	-	looplink	133	142	0.14	37.72	0	500 mM KCl	3
HspB8:133:x:HspB8:142	DGYVEVSGKHEEKQQEGGIVSK-K13-K22	HspB8	-	looplink	133	142	0.08	34.35	0	500 mM KCl	2
HspB8:142:x:HspB8:146	QQEGGIVSKNFTKK-K9-K13	HspB8	-	looplink	142	146	0	36.84	0	75 mM KCl	3
HspB8:142:x:HspB8:146	QQEGGIVSKNFTKK-K9-K13	HspB8	-	looplink	142	146	0.41	36.2	0	500 mM KCl	3
HspB8:142:x:HspB8:147	QQEGGIVSKNFTKK-K9-K14	HspB8	-	looplink	142	147	0.43	33.65	0	500 mM KCl	2
HspB8:142:x:HspB8:147	QQEGGIVSKNFTKK-K9-K14	HspB8	-	looplink	142	147	0	32.75	0	75 mM KCl	2
FUS-K9::x:FUS-K9:	ZGPAAAMASK-ZGPAAAMASK-a1-b1	FUS-K9	FUS-K9	intra-protein xl	1	1	0	28.14	0.018	75 mM KCl	2
FUS-K9::x:FUS-K9:106	SSQSSQSKSYGQQSK-ZGPAAAMASK-a8-b1	FUS-K9	FUS-K9	intra-protein xl	106	1	0.46	36.58	0	500 mM KCl	3
FUS-K9::x:FUS-K9:106	SSQSSQSKSYGQQSK-ZGPAAAMASK-a8-b1	FUS-K9	FUS-K9	intra-protein xl	106	1	0.47	35.77	0	75 mM KCl	3
FUS-K9::x:FUS-K9:113	SYGQQSKSYPGYGK-ZGPAAAMASK-a7-b1	FUS-K9	FUS-K9	intra-protein xl	113	1	0	32.73	0	500 mM KCl	2
FUS-K9::x:FUS-K9:140	GSYGSSSQSKSSYGQPQSGK-ZGPAAAMASK-a10-b1	FUS-K9	FUS-K9	intra-protein xl	140	1	0.32	41.2	0	75 mM KCl	3
FUS-K9::x:FUS-K9:140	GSYGSSSQSKSSYGQPQSGK-ZGPAAAMASK-a10-b1	FUS-K9	FUS-K9	intra-protein xl	140	1	0	38.79	0	500 mM KCl	3
FUS-K9::x:FUS-K9:150	SSYGQPQSGKSYSQQPSYGK-ZGPAAAMASK-a10-b1	FUS-K9	FUS-K9	intra-protein xl	150	1	0	25.79	0.018	75 mM KCl	3
FUS-K9::x:FUS-K9:16	NDYTQQKATQSYGK-ZGPAAAMASK-a7-b1	FUS-K9	FUS-K9	intra-protein xl	16	1	0.67	42.92	0	500 mM KCl	3
FUS-K9::x:FUS-K9:16	NDYTQQKATQSYGK-ZGPAAAMASK-a7-b1	FUS-K9	FUS-K9	intra-protein xl	16	1	0.61	37.25	0	75 mM KCl	3
FUS-K9::x:FUS-K9:160	SYSQQPSYGKGQQQSYGK-ZGPAAAMASK-a10-b1	FUS-K9	FUS-K9	intra-protein xl	160	1	0.3	25.05	0.007	75 mM KCl	3
FUS-K9::x:FUS-K9:168	GQQQSYGKQQQSYNPPQK-ZGPAAAMASK-a8-b1	FUS-K9	FUS-K9	intra-protein xl	168	1	0	38.58	0	500 mM KCl	3
FUS-K9::x:FUS-K9:168	GQQQSYGKQQQSYNPPQK-ZGPAAAMASK-a8-b1	FUS-K9	FUS-K9	intra-protein xl	168	1	0	36.53	0	75 mM KCl	3
FUS-K9::x:FUS-K9:188	GYEQQNQYNKSSSGGGGGGK-ZGPAAAMASK-a10-b1	FUS-K9	FUS-K9	intra-protein xl	188	1	0.31	37.24	0	75 mM KCl	3
FUS-K9::x:FUS-K9:198	SSSGGGGGGKGGGGNYGK-ZGPAAAMASK-a10-b1	FUS-K9	FUS-K9	intra-protein xl	198	1	0	34.62	0	75 mM KCl	3
FUS-K9::x:FUS-K9:198	SSSGGGGGGKGGGGNYGK-ZGPAAAMASK-a10-b1	FUS-K9	FUS-K9	intra-protein xl	198	1	0	30.55	0.011	500 mM KCl	2
FUS-K9::x:FUS-K9:206	GGGGNYGKQDQSSMSSGK-ZGPAAAMASK-a8-b1	FUS-K9	FUS-K9	intra-protein xl	206	1	0.48	36.79	0	75 mM KCl	2
FUS-K9::x:FUS-K9:225	GGSGGGYGKNQDQSGGGGK-ZGPAAAMASK-a9-b1	FUS-K9	FUS-K9	intra-protein xl	225	1	0.45	35.76	0	75 mM KCl	3
FUS-K9::x:FUS-K9:225	GGSGGGYGKNQDQSGGGGK-ZGPAAAMASK-a9-b1	FUS-K9	FUS-K9	intra-protein xl	225	1	0.35	32.25	0	500 mM KCl	3
FUS-K9::x:FUS-K9:23	ATQSYGKAYPTQPGQK-ZGPAAAMASK-a7-b1	FUS-K9	FUS-K9	intra-protein xl	23	1	0.37	31.83	0	75 mM KCl	3
FUS-K9::x:FUS-K9:23	ATQSYGKAYPTQPGQK-ZGPAAAMASK-a7-b1	FUS-K9	FUS-K9	intra-protein xl	23	1	0.52	31.81	0	500 mM KCl	3
FUS-K9::x:FUS-K9:235	NQDQSGGGGKSGGYGQQASDR-ZGPAAAMASK-a10-b1	FUS-K9	FUS-K9	intra-protein xl	235	1	0	43.12	0	500 mM KCl	3
FUS-K9::x:FUS-K9:235	NQDQSGGGGKSGGYGQQASDR-ZGPAAAMASK-a10-b1	FUS-K9	FUS-K9	intra-protein xl	235	1	0	42.85	0	75 mM KCl	3
FUS-K9::x:FUS-K9:32	AYPTQPGQKGYSQQSSK-ZGPAAAMASK-a9-b1	FUS-K9	FUS-K9	intra-protein xl	32	1	0.5	30.11	0.009	75 mM KCl	3
FUS-K9::x:FUS-K9:349	KTGQPMINLYTDR-ZGPAAAMASK-a1-b1	FUS-K9	FUS-K9	intra-protein xl	349	1	0	29.85	0.009	75 mM KCl	3
FUS-K9::x:FUS-K9:367	LKGEATVSFDDPPSAK-ZGPAAAMASK-a2-b1	FUS-K9	FUS-K9	intra-protein xl	367	1	0	36.23	0	75 mM KCl	3
FUS-K9::x:FUS-K9:367	LKGEATVSFDDPPSAK-ZGPAAAMASK-a2-b1	FUS-K9	FUS-K9	intra-protein xl	367	1	0	34.21	0	500 mM KCl	3
FUS-K9::x:FUS-K9:390	AAIDWFDGKEFSGNPIK-ZGPAAAMASK-a9-b1	FUS-K9	FUS-K9	intra-protein xl	390	1	0	41.03	0	500 mM KCl	3
FUS-K9::x:FUS-K9:390	AAIDWFDGKEFSGNPIK-ZGPAAAMASK-a9-b1	FUS-K9	FUS-K9	intra-protein xl	390	1	0	38.65	0	75 mM KCl	3
FUS-K9::x:FUS-K9:398	EFSGNPIKVSFATR-ZGPAAAMASK-a8-b1	FUS-K9	FUS-K9	intra-protein xl	398	1	0	29.13	0.016	75 mM KCl	3
FUS-K9::x:FUS-K9:398	EFSGNPIKVSFATR-ZGPAAAMASK-a8-b1	FUS-K9	FUS-K9	intra-protein xl	398	1	0	27.14	0.015	500 mM KCl	2
FUS-K9::x:FUS-K9:40	GYSQQSSKQPYGQQSYSK-ZGPAAAMASK-a8-b1	FUS-K9	FUS-K9	intra-protein xl	40	1	0.4	36.82	0	75 mM KCl	3
FUS-K9::x:FUS-K9:40	GYSQQSSKQPYGQQSYSK-ZGPAAAMASK-a8-b1	FUS-K9	FUS-K9	intra-protein xl	40	1	0.4	34.69	0	500 mM KCl	3
FUS-K9::x:FUS-K9:481	NECNQCKAPKPDGPGGGPGGSHMGGNYGDDR-ZGPAAAMASK-a7-b1	FUS-K9	FUS-K9	intra-protein xl	481	1	0.49	37.47	0	75 mM KCl	3
FUS-K9::x:FUS-K9:50	QPYGQQSYSKGYSQSTDTSK-ZGPAAAMASK-a10-b1	FUS-K9	FUS-K9	intra-protein xl	50	1	0.27	26.29	0.023	500 mM KCl	2
FUS-K9::x:FUS-K9:543	GGFGPGKMDSR-ZGPAAAMASK-a7-b1	FUS-K9	FUS-K9	intra-protein xl	543	1	0.46	38.65	0	75 mM KCl	3
FUS-K9::x:FUS-K9:543	GGFGPGKMDSR-ZGPAAAMASK-a7-b1	FUS-K9	FUS-K9	intra-protein xl	543	1	0.47	37.16	0	500 mM KCl	3
FUS-K9::x:FUS-K9:60	GYSQSTDTSKGYGQSSYSK-ZGPAAAMASK-a10-b1	FUS-K9	FUS-K9	intra-protein xl	60	1	0.28	41.81	0	75 mM KCl	3
FUS-K9::x:FUS-K9:60	GYSQSTDTSKGYGQSSYSK-ZGPAAAMASK-a10-b1	FUS-K9	FUS-K9	intra-protein xl	60	1	0.45	36.6	0	500 mM KCl	3
FUS-K9::x:FUS-K9:78	SYGQSQNTKGYGTQSTPQK-ZGPAAAMASK-a9-b1	FUS-K9	FUS-K9	intra-protein xl	78	1	0.4	41.83	0	75 mM KCl	3
FUS-K9::x:FUS-K9:78	SYGQSQNTKGYGTQSTPQK-ZGPAAAMASK-a9-b1	FUS-K9	FUS-K9	intra-protein xl	78	1	0.35	41.82	0	500 mM KCl	3
FUS-K9::x:FUS-K9:88	GYGTQSTPQKGYGSTGGYGK-ZGPAAAMASK-a10-b1	FUS-K9	FUS-K9	intra-protein xl	88	1	0.32	28.94	0.019	500 mM KCl	3
FUS-K9::x:FUS-K9:88	GYGTQSTPQKGYGSTGGYGK-ZGPAAAMASK-a10-b1	FUS-K9	FUS-K9	intra-protein xl	88	1	0.42	26.03	0.007	75 mM KCl	2
FUS-K9::x:FUS-K9:98	GYGSTGGYGKSSQSSQSK-ZGPAAAMASK-a10-b1	FUS-K9	FUS-K9	intra-protein xl	98	1	0	35.25	0	75 mM KCl	3
FUS-K9::x:FUS-K9:98	GYGSTGGYGKSSQSSQSK-ZGPAAAMASK-a10-b1	FUS-K9	FUS-K9	intra-protein xl	98	1	0.33	31.93	0	500 mM KCl	3
FUS-K9:106:x:FUS-K9:120	SYPGYGKQQPAPSSTSK-SSQSSQSKSYGQQSK-a7-b8	FUS-K9	FUS-K9	intra-protein xl	120	106	0.59	38.46	0	75 mM KCl	3
FUS-K9:106:x:FUS-K9:120	SYPGYGKQQPAPSSTSK-SSQSSQSKSYGQQSK-a7-b8	FUS-K9	FUS-K9	intra-protein xl	120	106	0.63	38.04	0	500 mM KCl	3
FUS-K9:106:x:FUS-K9:130	QQPAPSSTSKGSYGSSSQSK-SSQSSQSKSYGQQSK-a10-b8	FUS-K9	FUS-K9	intra-protein xl	130	106	0.82	31.82	0	75 mM KCl	3
FUS-K9:106:x:FUS-K9:140	GSYGSSSQSKSSYGQPQSGK-SSQSSQSKSYGQQSK-a10-b8	FUS-K9	FUS-K9	intra-protein xl	140	106	0.64	51.98	0	500 mM KCl	3
FUS-K9:106:x:FUS-K9:140	GSYGSSSQSKSSYGQPQSGK-SSQSSQSKSYGQQSK-a10-b8	FUS-K9	FUS-K9	intra-protein xl	140	106	0.59	51.03	0	75 mM KCl	3
FUS-K9:106:x:FUS-K9:16	SSQSSQSKSYGQQSK-NDYTQQKATQSYGK-a8-b7	FUS-K9	FUS-K9	intra-protein xl	106	16	0.66	49.62	0	75 mM KCl	2
FUS-K9:106:x:FUS-K9:168	GQQQSYGKQQQSYNPPQK-SSQSSQSKSYGQQSK-a8-b8	FUS-K9	FUS-K9	intra-protein xl	168	106	0.6	48.19	0	75 mM KCl	3
FUS-K9:106:x:FUS-K9:168	GQQQSYGKQQQSYNPPQK-SSQSSQSKSYGQQSK-a8-b8	FUS-K9	FUS-K9	intra-protein xl	168	106	0.62	46.06	0	500 mM KCl	3
FUS-K9:106:x:FUS-K9:32	AYPTQPGQKGYSQQSSK-SSQSSQSKSYGQQSK-a9-b8	FUS-K9	FUS-K9	intra-protein xl	32	106	0.77	33.75	0	75 mM KCl	3
FUS-K9:106:x:FUS-K9:32	AYPTQPGQKGYSQQSSK-SSQSSQSKSYGQQSK-a9-b8	FUS-K9	FUS-K9	intra-protein xl	32	106	0.77	29.98	0	500 mM KCl	3
FUS-K9:106:x:FUS-K9:367	LKGEATVSFDDPPSAK-SSQSSQSKSYGQQSK-a2-b8	FUS-K9	FUS-K9	intra-protein xl	367	106	0.73	30.43	0	500 mM KCl	2
FUS-K9:106:x:FUS-K9:543	SSQSSQSKSYGQQSK-GGFGPGKMDSR-a8-b7	FUS-K9	FUS-K9	intra-protein xl	106	543	0.55	32.14	0	75 mM KCl	2
FUS-K9:106:x:FUS-K9:60	GYSQSTDTSKGYGQSSYSK-SSQSSQSKSYGQQSK-a10-b8	FUS-K9	FUS-K9	intra-protein xl	60	106	0.59	41.6	0	75 mM KCl	2
FUS-K9:106:x:FUS-K9:69	GYGQSSYSKSYGQSQNTK-SSQSSQSKSYGQQSK-a9-b8	FUS-K9	FUS-K9	intra-protein xl	69	106	0.51	44.39	0	500 mM KCl	2
FUS-K9:106:x:FUS-K9:69	GYGQSSYSKSYGQSQNTK-SSQSSQSKSYGQQSK-a9-b8	FUS-K9	FUS-K9	intra-protein xl	69	106	0.56	43.99	0	75 mM KCl	2
FUS-K9:106:x:FUS-K9:78	SYGQSQNTKGYGTQSTPQK-SSQSSQSKSYGQQSK-a9-b8	FUS-K9	FUS-K9	intra-protein xl	78	106	0.6	52.49	0	500 mM KCl	3
FUS-K9:106:x:FUS-K9:78	SYGQSQNTKGYGTQSTPQK-SSQSSQSKSYGQQSK-a9-b8	FUS-K9	FUS-K9	intra-protein xl	78	106	0.58	50.79	0	75 mM KCl	3
FUS-K9:106:x:FUS-K9:88	GYGTQSTPQKGYGSTGGYGK-SSQSSQSKSYGQQSK-a10-b8	FUS-K9	FUS-K9	intra-protein xl	88	106	0.51	40.21	0	500 mM KCl	3
FUS-K9:106:x:FUS-K9:88	GYGTQSTPQKGYGSTGGYGK-SSQSSQSKSYGQQSK-a10-b8	FUS-K9	FUS-K9	intra-protein xl	88	106	0.61	39.84	0	75 mM KCl	3
FUS-K9:113:x:FUS-K9:130	QQPAPSSTSKGSYGSSSQSK-SYGQQSKSYPGYGK-a10-b7	FUS-K9	FUS-K9	intra-protein xl	130	113	0.53	28.7	0	500 mM KCl	2
FUS-K9:113:x:FUS-K9:140	GSYGSSSQSKSSYGQPQSGK-SYGQQSKSYPGYGK-a10-b7	FUS-K9	FUS-K9	intra-protein xl	140	113	0	40.37	0	500 mM KCl	2
FUS-K9:113:x:FUS-K9:150	SSYGQPQSGKSYSQQPSYGK-SYGQQSKSYPGYGK-a10-b7	FUS-K9	FUS-K9	intra-protein xl	150	113	0	31.47	0.015	75 mM KCl	2
FUS-K9:113:x:FUS-K9:150	SSYGQPQSGKSYSQQPSYGK-SYGQQSKSYPGYGK-a10-b7	FUS-K9	FUS-K9	intra-protein xl	150	113	0	31.08	0	500 mM KCl	3
FUS-K9:113:x:FUS-K9:168	GQQQSYGKQQQSYNPPQK-SYGQQSKSYPGYGK-a8-b7	FUS-K9	FUS-K9	intra-protein xl	168	113	0	37.67	0	500 mM KCl	3
FUS-K9:113:x:FUS-K9:88	GYGTQSTPQKGYGSTGGYGK-SYGQQSKSYPGYGK-a10-b7	FUS-K9	FUS-K9	intra-protein xl	88	113	0.69	37.55	0	500 mM KCl	3
FUS-K9:113:x:FUS-K9:88	GYGTQSTPQKGYGSTGGYGK-SYGQQSKSYPGYGK-a10-b7	FUS-K9	FUS-K9	intra-protein xl	88	113	0.68	32.58	0	75 mM KCl	3
FUS-K9:113:x:FUS-K9:98	GYGSTGGYGKSSQSSQSK-SYGQQSKSYPGYGK-a10-b7	FUS-K9	FUS-K9	intra-protein xl	98	113	0.6	42.31	0	500 mM KCl	3
FUS-K9:113:x:FUS-K9:98	GYGSTGGYGKSSQSSQSK-SYGQQSKSYPGYGK-a10-b7	FUS-K9	FUS-K9	intra-protein xl	98	113	0.64	37.96	0	75 mM KCl	3
FUS-K9:120:x:FUS-K9:140	GSYGSSSQSKSSYGQPQSGK-SYPGYGKQQPAPSSTSK-a10-b7	FUS-K9	FUS-K9	intra-protein xl	140	120	0.01	29.34	0.006	500 mM KCl	3
FUS-K9:120:x:FUS-K9:140	GSYGSSSQSKSSYGQPQSGK-SYPGYGKQQPAPSSTSK-a10-b7	FUS-K9	FUS-K9	intra-protein xl	140	120	0.52	27.88	0.007	75 mM KCl	2
FUS-K9:120:x:FUS-K9:150	SSYGQPQSGKSYSQQPSYGK-SYPGYGKQQPAPSSTSK-a10-b7	FUS-K9	FUS-K9	intra-protein xl	150	120	0.68	27.4	0.018	75 mM KCl	3
FUS-K9:120:x:FUS-K9:168	GQQQSYGKQQQSYNPPQK-SYPGYGKQQPAPSSTSK-a8-b7	FUS-K9	FUS-K9	intra-protein xl	168	120	0.59	26.03	0.007	75 mM KCl	2
FUS-K9:120:x:FUS-K9:198	SSSGGGGGGKGGGGNYGK-SYPGYGKQQPAPSSTSK-a10-b7	FUS-K9	FUS-K9	intra-protein xl	198	120	0.7	26.44	0.018	75 mM KCl	2
FUS-K9:120:x:FUS-K9:23	SYPGYGKQQPAPSSTSK-ATQSYGKAYPTQPGQK-a7-b7	FUS-K9	FUS-K9	intra-protein xl	120	23	0.68	26.03	0.015	75 mM KCl	3
FUS-K9:120:x:FUS-K9:367	SYPGYGKQQPAPSSTSK-LKGEATVSFDDPPSAK-a7-b2	FUS-K9	FUS-K9	intra-protein xl	120	367	0.73	28.95	0.007	75 mM KCl	2
FUS-K9:120:x:FUS-K9:543	SYPGYGKQQPAPSSTSK-GGFGPGKMDSR-a7-b7	FUS-K9	FUS-K9	intra-protein xl	120	543	0.69	26.04	0.018	75 mM KCl	2
FUS-K9:130:x:FUS-K9:150	QQPAPSSTSKGSYGSSSQSK-SSYGQPQSGKSYSQQPSYGK-a10-b10	FUS-K9	FUS-K9	intra-protein xl	130	150	0	32.24	0	500 mM KCl	3
FUS-K9:130:x:FUS-K9:150	QQPAPSSTSKGSYGSSSQSK-SSYGQPQSGKSYSQQPSYGK-a10-b10	FUS-K9	FUS-K9	intra-protein xl	130	150	0	27.73	0.007	75 mM KCl	2
FUS-K9:130:x:FUS-K9:160	QQPAPSSTSKGSYGSSSQSK-SYSQQPSYGKGQQQSYGK-a10-b10	FUS-K9	FUS-K9	intra-protein xl	130	160	0.68	27.71	0.018	75 mM KCl	2
FUS-K9:130:x:FUS-K9:160	QQPAPSSTSKGSYGSSSQSK-SYSQQPSYGKGQQQSYGK-a10-b10	FUS-K9	FUS-K9	intra-protein xl	130	160	0	26.45	0.006	500 mM KCl	2
FUS-K9:130:x:FUS-K9:168	QQPAPSSTSKGSYGSSSQSK-GQQQSYGKQQQSYNPPQK-a10-b8	FUS-K9	FUS-K9	intra-protein xl	130	168	0	26.44	0.018	75 mM KCl	2
FUS-K9:130:x:FUS-K9:367	QQPAPSSTSKGSYGSSSQSK-LKGEATVSFDDPPSAK-a10-b2	FUS-K9	FUS-K9	intra-protein xl	130	367	0	27.36	0.018	75 mM KCl	2
FUS-K9:140:x:FUS-K9:160	GSYGSSSQSKSSYGQPQSGK-SYSQQPSYGKGQQQSYGK-a10-b10	FUS-K9	FUS-K9	intra-protein xl	140	160	0.6	33.21	0	500 mM KCl	3
FUS-K9:140:x:FUS-K9:160	GSYGSSSQSKSSYGQPQSGK-SYSQQPSYGKGQQQSYGK-a10-b10	FUS-K9	FUS-K9	intra-protein xl	140	160	0.41	30.49	0.015	75 mM KCl	3
FUS-K9:140:x:FUS-K9:168	GSYGSSSQSKSSYGQPQSGK-GQQQSYGKQQQSYNPPQK-a10-b8	FUS-K9	FUS-K9	intra-protein xl	140	168	0	48.3	0	500 mM KCl	2
FUS-K9:140:x:FUS-K9:168	GSYGSSSQSKSSYGQPQSGK-GQQQSYGKQQQSYNPPQK-a10-b8	FUS-K9	FUS-K9	intra-protein xl	140	168	0	43.72	0	75 mM KCl	2
FUS-K9:140:x:FUS-K9:198	GSYGSSSQSKSSYGQPQSGK-SSSGGGGGGKGGGGNYGK-a10-b10	FUS-K9	FUS-K9	intra-protein xl	140	198	0.52	48.76	0	75 mM KCl	2
FUS-K9:140:x:FUS-K9:198	GSYGSSSQSKSSYGQPQSGK-SSSGGGGGGKGGGGNYGK-a10-b10	FUS-K9	FUS-K9	intra-protein xl	140	198	0.59	39.75	0	500 mM KCl	3
FUS-K9:140:x:FUS-K9:367	GSYGSSSQSKSSYGQPQSGK-LKGEATVSFDDPPSAK-a10-b2	FUS-K9	FUS-K9	intra-protein xl	140	367	0.74	34.62	0	75 mM KCl	3
FUS-K9:140:x:FUS-K9:367	GSYGSSSQSKSSYGQPQSGK-LKGEATVSFDDPPSAK-a10-b2	FUS-K9	FUS-K9	intra-protein xl	140	367	0	26.98	0.023	500 mM KCl	2
FUS-K9:140:x:FUS-K9:98	GSYGSSSQSKSSYGQPQSGK-GYGSTGGYGKSSQSSQSK-a10-b10	FUS-K9	FUS-K9	intra-protein xl	140	98	0	43.28	0	75 mM KCl	2
FUS-K9:150:x:FUS-K9:168	SSYGQPQSGKSYSQQPSYGK-GQQQSYGKQQQSYNPPQK-a10-b8	FUS-K9	FUS-K9	intra-protein xl	150	168	0.26	38.44	0	500 mM KCl	3
FUS-K9:150:x:FUS-K9:168	SSYGQPQSGKSYSQQPSYGK-GQQQSYGKQQQSYNPPQK-a10-b8	FUS-K9	FUS-K9	intra-protein xl	150	168	0.15	36.66	0	75 mM KCl	3
FUS-K9:150:x:FUS-K9:88	GYGTQSTPQKGYGSTGGYGK-SSYGQPQSGKSYSQQPSYGK-a10-b10	FUS-K9	FUS-K9	intra-protein xl	88	150	0.74	25.29	0.015	500 mM KCl	2
FUS-K9:150:x:FUS-K9:98	SSYGQPQSGKSYSQQPSYGK-GYGSTGGYGKSSQSSQSK-a10-b10	FUS-K9	FUS-K9	intra-protein xl	150	98	0	27.25	0.006	500 mM KCl	2
FUS-K9:16:x:FUS-K9:32	AYPTQPGQKGYSQQSSK-NDYTQQKATQSYGK-a9-b7	FUS-K9	FUS-K9	intra-protein xl	32	16	0.6	36.42	0	75 mM KCl	3
FUS-K9:16:x:FUS-K9:32	AYPTQPGQKGYSQQSSK-NDYTQQKATQSYGK-a9-b7	FUS-K9	FUS-K9	intra-protein xl	32	16	0.59	34.59	0	500 mM KCl	3
FUS-K9:16:x:FUS-K9:40	GYSQQSSKQPYGQQSYSK-NDYTQQKATQSYGK-a8-b7	FUS-K9	FUS-K9	intra-protein xl	40	16	0.63	40.15	0	500 mM KCl	3
FUS-K9:16:x:FUS-K9:40	GYSQQSSKQPYGQQSYSK-NDYTQQKATQSYGK-a8-b7	FUS-K9	FUS-K9	intra-protein xl	40	16	0.63	37.98	0	75 mM KCl	3
FUS-K9:16:x:FUS-K9:50	QPYGQQSYSKGYSQSTDTSK-NDYTQQKATQSYGK-a10-b7	FUS-K9	FUS-K9	intra-protein xl	50	16	0.7	26.26	0.018	75 mM KCl	2
FUS-K9:16:x:FUS-K9:69	GYGQSSYSKSYGQSQNTK-NDYTQQKATQSYGK-a9-b7	FUS-K9	FUS-K9	intra-protein xl	69	16	0.69	40.58	0	75 mM KCl	2
FUS-K9:16:x:FUS-K9:88	GYGTQSTPQKGYGSTGGYGK-NDYTQQKATQSYGK-a10-b7	FUS-K9	FUS-K9	intra-protein xl	88	16	0.38	33.92	0	75 mM KCl	2
FUS-K9:160:x:FUS-K9:178	QQQSYNPPQKGYEQQNQYNK-SYSQQPSYGKGQQQSYGK-a10-b10	FUS-K9	FUS-K9	intra-protein xl	178	160	0.49	26.1	0.018	75 mM KCl	2
FUS-K9:160:x:FUS-K9:188	GYEQQNQYNKSSSGGGGGGK-SYSQQPSYGKGQQQSYGK-a10-b10	FUS-K9	FUS-K9	intra-protein xl	188	160	0.71	28.54	0	500 mM KCl	3
FUS-K9:160:x:FUS-K9:198	SSSGGGGGGKGGGGNYGK-SYSQQPSYGKGQQQSYGK-a10-b10	FUS-K9	FUS-K9	intra-protein xl	198	160	0.61	33.18	0	75 mM KCl	3
FUS-K9:160:x:FUS-K9:198	SSSGGGGGGKGGGGNYGK-SYSQQPSYGKGQQQSYGK-a10-b10	FUS-K9	FUS-K9	intra-protein xl	198	160	0.61	30.86	0	500 mM KCl	3
FUS-K9:160:x:FUS-K9:367	SYSQQPSYGKGQQQSYGK-LKGEATVSFDDPPSAK-a10-b2	FUS-K9	FUS-K9	intra-protein xl	160	367	0.69	33.73	0	75 mM KCl	2
FUS-K9:160:x:FUS-K9:367	SYSQQPSYGKGQQQSYGK-LKGEATVSFDDPPSAK-a10-b2	FUS-K9	FUS-K9	intra-protein xl	160	367	0	30.41	0.011	500 mM KCl	3
FUS-K9:168:x:FUS-K9:188	GYEQQNQYNKSSSGGGGGGK-GQQQSYGKQQQSYNPPQK-a10-b8	FUS-K9	FUS-K9	intra-protein xl	188	168	0.66	54.31	0	500 mM KCl	3
FUS-K9:168:x:FUS-K9:188	GYEQQNQYNKSSSGGGGGGK-GQQQSYGKQQQSYNPPQK-a10-b8	FUS-K9	FUS-K9	intra-protein xl	188	168	0.59	50.99	0	75 mM KCl	3
FUS-K9:168:x:FUS-K9:198	GQQQSYGKQQQSYNPPQK-SSSGGGGGGKGGGGNYGK-a8-b10	FUS-K9	FUS-K9	intra-protein xl	168	198	0.15	43.28	0	500 mM KCl	3
FUS-K9:168:x:FUS-K9:206	GGGGNYGKQDQSSMSSGK-GQQQSYGKQQQSYNPPQK-a8-b8	FUS-K9	FUS-K9	intra-protein xl	206	168	0.29	41.15	0	500 mM KCl	2
FUS-K9:168:x:FUS-K9:225	GGSGGGYGKNQDQSGGGGK-GQQQSYGKQQQSYNPPQK-a9-b8	FUS-K9	FUS-K9	intra-protein xl	225	168	0.74	37.84	0	500 mM KCl	3
FUS-K9:168:x:FUS-K9:235	NQDQSGGGGKSGGYGQQASDR-GQQQSYGKQQQSYNPPQK-a10-b8	FUS-K9	FUS-K9	intra-protein xl	235	168	0.13	34.15	0	500 mM KCl	3
FUS-K9:168:x:FUS-K9:367	GQQQSYGKQQQSYNPPQK-LKGEATVSFDDPPSAK-a8-b2	FUS-K9	FUS-K9	intra-protein xl	168	367	0	35.71	0	500 mM KCl	3
FUS-K9:168:x:FUS-K9:367	GQQQSYGKQQQSYNPPQK-LKGEATVSFDDPPSAK-a8-b2	FUS-K9	FUS-K9	intra-protein xl	168	367	0	35.15	0	75 mM KCl	3
FUS-K9:178:x:FUS-K9:198	QQQSYNPPQKGYEQQNQYNK-SSSGGGGGGKGGGGNYGK-a10-b10	FUS-K9	FUS-K9	intra-protein xl	178	198	0.84	25.46	0.007	75 mM KCl	3
FUS-K9:188:x:FUS-K9:206	GYEQQNQYNKSSSGGGGGGK-GGGGNYGKQDQSSMSSGK-a10-b8	FUS-K9	FUS-K9	intra-protein xl	188	206	0.65	50.91	0	75 mM KCl	3
FUS-K9:188:x:FUS-K9:206	GYEQQNQYNKSSSGGGGGGK-GGGGNYGKQDQSSMSSGK-a10-b8	FUS-K9	FUS-K9	intra-protein xl	188	206	0.42	50	0	500 mM KCl	3
FUS-K9:188:x:FUS-K9:216	GYEQQNQYNKSSSGGGGGGK-QDQSSMSSGKGGSGGGYGK-a10-b10	FUS-K9	FUS-K9	intra-protein xl	188	216	0.62	45.19	0	500 mM KCl	3
FUS-K9:188:x:FUS-K9:216	GYEQQNQYNKSSSGGGGGGK-QDQSSMSSGKGGSGGGYGK-a10-b10	FUS-K9	FUS-K9	intra-protein xl	188	216	0.62	40.01	0	75 mM KCl	3
FUS-K9:188:x:FUS-K9:225	GYEQQNQYNKSSSGGGGGGK-GGSGGGYGKNQDQSGGGGK-a10-b9	FUS-K9	FUS-K9	intra-protein xl	188	225	0.68	46.57	0	500 mM KCl	3
FUS-K9:188:x:FUS-K9:225	GYEQQNQYNKSSSGGGGGGK-GGSGGGYGKNQDQSGGGGK-a10-b9	FUS-K9	FUS-K9	intra-protein xl	188	225	0.75	39.59	0	75 mM KCl	3
FUS-K9:188:x:FUS-K9:235	NQDQSGGGGKSGGYGQQASDR-GYEQQNQYNKSSSGGGGGGK-a10-b10	FUS-K9	FUS-K9	intra-protein xl	235	188	0.63	54.47	0	500 mM KCl	3
FUS-K9:188:x:FUS-K9:235	NQDQSGGGGKSGGYGQQASDR-GYEQQNQYNKSSSGGGGGGK-a10-b10	FUS-K9	FUS-K9	intra-protein xl	235	188	0.63	50.87	0	75 mM KCl	3
FUS-K9:188:x:FUS-K9:365	GYEQQNQYNKSSSGGGGGGK-ETGKLK-a10-b4	FUS-K9	FUS-K9	intra-protein xl	188	365	0.45	27.38	0.015	75 mM KCl	2
FUS-K9:188:x:FUS-K9:367	GYEQQNQYNKSSSGGGGGGK-LKGEATVSFDDPPSAK-a10-b2	FUS-K9	FUS-K9	intra-protein xl	188	367	0.75	34.23	0	75 mM KCl	3
FUS-K9:188:x:FUS-K9:367	GYEQQNQYNKSSSGGGGGGK-LKGEATVSFDDPPSAK-a10-b2	FUS-K9	FUS-K9	intra-protein xl	188	367	0.84	33.08	0	500 mM KCl	3
FUS-K9:188:x:FUS-K9:390	GYEQQNQYNKSSSGGGGGGK-AAIDWFDGKEFSGNPIK-a10-b9	FUS-K9	FUS-K9	intra-protein xl	188	390	0.84	33.94	0	500 mM KCl	3
FUS-K9:188:x:FUS-K9:390	GYEQQNQYNKSSSGGGGGGK-AAIDWFDGKEFSGNPIK-a10-b9	FUS-K9	FUS-K9	intra-protein xl	188	390	0.87	32.31	0	75 mM KCl	2
FUS-K9:198:x:FUS-K9:216	QDQSSMSSGKGGSGGGYGK-SSSGGGGGGKGGGGNYGK-a10-b10	FUS-K9	FUS-K9	intra-protein xl	216	198	0	39.23	0	500 mM KCl	3
FUS-K9:198:x:FUS-K9:216	QDQSSMSSGKGGSGGGYGK-SSSGGGGGGKGGGGNYGK-a10-b10	FUS-K9	FUS-K9	intra-protein xl	216	198	0	37.85	0	75 mM KCl	3
FUS-K9:198:x:FUS-K9:225	GGSGGGYGKNQDQSGGGGK-SSSGGGGGGKGGGGNYGK-a9-b10	FUS-K9	FUS-K9	intra-protein xl	225	198	0.61	43.32	0	500 mM KCl	3
FUS-K9:198:x:FUS-K9:225	GGSGGGYGKNQDQSGGGGK-SSSGGGGGGKGGGGNYGK-a9-b10	FUS-K9	FUS-K9	intra-protein xl	225	198	0.64	38.93	0	75 mM KCl	3
FUS-K9:198:x:FUS-K9:32	SSSGGGGGGKGGGGNYGK-AYPTQPGQKGYSQQSSK-a10-b9	FUS-K9	FUS-K9	intra-protein xl	198	32	0.42	29.4	0.016	75 mM KCl	3
FUS-K9:198:x:FUS-K9:367	SSSGGGGGGKGGGGNYGK-LKGEATVSFDDPPSAK-a10-b2	FUS-K9	FUS-K9	intra-protein xl	198	367	0	35.82	0	75 mM KCl	3
FUS-K9:198:x:FUS-K9:367	SSSGGGGGGKGGGGNYGK-LKGEATVSFDDPPSAK-a10-b2	FUS-K9	FUS-K9	intra-protein xl	198	367	0	34.23	0	500 mM KCl	3
FUS-K9:198:x:FUS-K9:390	SSSGGGGGGKGGGGNYGK-AAIDWFDGKEFSGNPIK-a10-b9	FUS-K9	FUS-K9	intra-protein xl	198	390	0	29.82	0.009	75 mM KCl	2
FUS-K9:198:x:FUS-K9:543	SSSGGGGGGKGGGGNYGK-GGFGPGKMDSR-a10-b7	FUS-K9	FUS-K9	intra-protein xl	198	543	0.66	41.56	0	75 mM KCl	2
FUS-K9:206:x:FUS-K9:225	GGSGGGYGKNQDQSGGGGK-GGGGNYGKQDQSSMSSGK-a9-b8	FUS-K9	FUS-K9	intra-protein xl	225	206	0.67	46.83	0	500 mM KCl	3
FUS-K9:206:x:FUS-K9:225	GGSGGGYGKNQDQSGGGGK-GGGGNYGKQDQSSMSSGK-a9-b8	FUS-K9	FUS-K9	intra-protein xl	225	206	0.62	43.36	0	75 mM KCl	3
FUS-K9:206:x:FUS-K9:235	NQDQSGGGGKSGGYGQQASDR-GGGGNYGKQDQSSMSSGK-a10-b8	FUS-K9	FUS-K9	intra-protein xl	235	206	0	54.18	0	75 mM KCl	3
FUS-K9:206:x:FUS-K9:235	NQDQSGGGGKSGGYGQQASDR-GGGGNYGKQDQSSMSSGK-a10-b8	FUS-K9	FUS-K9	intra-protein xl	235	206	0	53.89	0	500 mM KCl	3
FUS-K9:206:x:FUS-K9:367	GGGGNYGKQDQSSMSSGK-LKGEATVSFDDPPSAK-a8-b2	FUS-K9	FUS-K9	intra-protein xl	206	367	0.72	34.84	0	75 mM KCl	3
FUS-K9:206:x:FUS-K9:367	GGGGNYGKQDQSSMSSGK-LKGEATVSFDDPPSAK-a8-b2	FUS-K9	FUS-K9	intra-protein xl	206	367	0.77	33.35	0	500 mM KCl	2
FUS-K9:216:x:FUS-K9:235	NQDQSGGGGKSGGYGQQASDR-QDQSSMSSGKGGSGGGYGK-a10-b10	FUS-K9	FUS-K9	intra-protein xl	235	216	0.61	43.78	0	500 mM KCl	3
FUS-K9:216:x:FUS-K9:235	NQDQSGGGGKSGGYGQQASDR-QDQSSMSSGKGGSGGGYGK-a10-b10	FUS-K9	FUS-K9	intra-protein xl	235	216	0	38.63	0	75 mM KCl	3
FUS-K9:225:x:FUS-K9:367	GGSGGGYGKNQDQSGGGGK-LKGEATVSFDDPPSAK-a9-b2	FUS-K9	FUS-K9	intra-protein xl	225	367	0	38.24	0	75 mM KCl	3
FUS-K9:225:x:FUS-K9:367	GGSGGGYGKNQDQSGGGGK-LKGEATVSFDDPPSAK-a9-b2	FUS-K9	FUS-K9	intra-protein xl	225	367	0.74	32.74	0	500 mM KCl	3
FUS-K9:225:x:FUS-K9:390	GGSGGGYGKNQDQSGGGGK-AAIDWFDGKEFSGNPIK-a9-b9	FUS-K9	FUS-K9	intra-protein xl	225	390	0.77	34.74	0	500 mM KCl	2
FUS-K9:225:x:FUS-K9:390	GGSGGGYGKNQDQSGGGGK-AAIDWFDGKEFSGNPIK-a9-b9	FUS-K9	FUS-K9	intra-protein xl	225	390	0.15	34.38	0	75 mM KCl	3
FUS-K9:225:x:FUS-K9:78	GGSGGGYGKNQDQSGGGGK-SYGQSQNTKGYGTQSTPQK-a9-b9	FUS-K9	FUS-K9	intra-protein xl	225	78	0.62	36.96	0	75 mM KCl	2
FUS-K9:225:x:FUS-K9:98	GGSGGGYGKNQDQSGGGGK-GYGSTGGYGKSSQSSQSK-a9-b10	FUS-K9	FUS-K9	intra-protein xl	225	98	0.66	33.37	0	75 mM KCl	2
FUS-K9:23:x:FUS-K9:40	GYSQQSSKQPYGQQSYSK-ATQSYGKAYPTQPGQK-a8-b7	FUS-K9	FUS-K9	intra-protein xl	40	23	0.6	36.54	0	75 mM KCl	3
FUS-K9:23:x:FUS-K9:40	GYSQQSSKQPYGQQSYSK-ATQSYGKAYPTQPGQK-a8-b7	FUS-K9	FUS-K9	intra-protein xl	40	23	0.65	33.09	0	500 mM KCl	3
FUS-K9:23:x:FUS-K9:50	QPYGQQSYSKGYSQSTDTSK-ATQSYGKAYPTQPGQK-a10-b7	FUS-K9	FUS-K9	intra-protein xl	50	23	0	28.82	0.019	500 mM KCl	3
FUS-K9:23:x:FUS-K9:50	QPYGQQSYSKGYSQSTDTSK-ATQSYGKAYPTQPGQK-a10-b7	FUS-K9	FUS-K9	intra-protein xl	50	23	0.65	28.31	0.007	75 mM KCl	3
FUS-K9:23:x:FUS-K9:60	GYSQSTDTSKGYGQSSYSK-ATQSYGKAYPTQPGQK-a10-b7	FUS-K9	FUS-K9	intra-protein xl	60	23	0.65	26.46	0.007	75 mM KCl	2
FUS-K9:23:x:FUS-K9:60	GYSQSTDTSKGYGQSSYSK-ATQSYGKAYPTQPGQK-a10-b7	FUS-K9	FUS-K9	intra-protein xl	60	23	0.66	26.15	0.015	500 mM KCl	2
FUS-K9:23:x:FUS-K9:69	GYGQSSYSKSYGQSQNTK-ATQSYGKAYPTQPGQK-a9-b7	FUS-K9	FUS-K9	intra-protein xl	69	23	0.75	27.22	0.007	75 mM KCl	3
FUS-K9:23:x:FUS-K9:69	GYGQSSYSKSYGQSQNTK-ATQSYGKAYPTQPGQK-a9-b7	FUS-K9	FUS-K9	intra-protein xl	69	23	0.68	25.56	0.015	500 mM KCl	2
FUS-K9:23:x:FUS-K9:88	GYGTQSTPQKGYGSTGGYGK-ATQSYGKAYPTQPGQK-a10-b7	FUS-K9	FUS-K9	intra-protein xl	88	23	0	27.07	0.007	75 mM KCl	3
FUS-K9:235:x:FUS-K9:297	NQDQSGGGGKSGGYGQQASDR-GGFNKFGGPR-a10-b5	FUS-K9	FUS-K9	intra-protein xl	235	297	0	42.03	0	500 mM KCl	3
FUS-K9:235:x:FUS-K9:367	NQDQSGGGGKSGGYGQQASDR-LKGEATVSFDDPPSAK-a10-b2	FUS-K9	FUS-K9	intra-protein xl	235	367	0	34.05	0	500 mM KCl	3
FUS-K9:235:x:FUS-K9:367	NQDQSGGGGKSGGYGQQASDR-LKGEATVSFDDPPSAK-a10-b2	FUS-K9	FUS-K9	intra-protein xl	235	367	0	33.08	0	75 mM KCl	2
FUS-K9:235:x:FUS-K9:390	NQDQSGGGGKSGGYGQQASDR-AAIDWFDGKEFSGNPIK-a10-b9	FUS-K9	FUS-K9	intra-protein xl	235	390	0	46.5	0	500 mM KCl	2
FUS-K9:235:x:FUS-K9:390	NQDQSGGGGKSGGYGQQASDR-AAIDWFDGKEFSGNPIK-a10-b9	FUS-K9	FUS-K9	intra-protein xl	235	390	0.16	42.41	0	75 mM KCl	2
FUS-K9:297:x:FUS-K9:367	LKGEATVSFDDPPSAK-GGFNKFGGPR-a2-b5	FUS-K9	FUS-K9	intra-protein xl	367	297	0	44.02	0	75 mM KCl	3
FUS-K9:297:x:FUS-K9:367	LKGEATVSFDDPPSAK-GGFNKFGGPR-a2-b5	FUS-K9	FUS-K9	intra-protein xl	367	297	0	42.94	0	500 mM KCl	3
FUS-K9:297:x:FUS-K9:390	AAIDWFDGKEFSGNPIK-GGFNKFGGPR-a9-b5	FUS-K9	FUS-K9	intra-protein xl	390	297	0	40.5	0	75 mM KCl	3
FUS-K9:297:x:FUS-K9:390	AAIDWFDGKEFSGNPIK-GGFNKFGGPR-a9-b5	FUS-K9	FUS-K9	intra-protein xl	390	297	0	39.23	0	500 mM KCl	3
FUS-K9:297:x:FUS-K9:398	EFSGNPIKVSFATR-GGFNKFGGPR-a8-b5	FUS-K9	FUS-K9	intra-protein xl	398	297	0	33.68	0	500 mM KCl	3
FUS-K9:297:x:FUS-K9:398	EFSGNPIKVSFATR-GGFNKFGGPR-a8-b5	FUS-K9	FUS-K9	intra-protein xl	398	297	0	31.65	0	75 mM KCl	2
FUS-K9:32:x:FUS-K9:367	AYPTQPGQKGYSQQSSK-LKGEATVSFDDPPSAK-a9-b2	FUS-K9	FUS-K9	intra-protein xl	32	367	0	36.4	0	75 mM KCl	3
FUS-K9:32:x:FUS-K9:367	AYPTQPGQKGYSQQSSK-LKGEATVSFDDPPSAK-a9-b2	FUS-K9	FUS-K9	intra-protein xl	32	367	0	30.3	0	500 mM KCl	2
FUS-K9:32:x:FUS-K9:60	GYSQSTDTSKGYGQSSYSK-AYPTQPGQKGYSQQSSK-a10-b9	FUS-K9	FUS-K9	intra-protein xl	60	32	0.68	27.88	0.007	75 mM KCl	3
FUS-K9:32:x:FUS-K9:60	GYSQSTDTSKGYGQSSYSK-AYPTQPGQKGYSQQSSK-a10-b9	FUS-K9	FUS-K9	intra-protein xl	60	32	0.63	27.73	0.006	500 mM KCl	2
FUS-K9:32:x:FUS-K9:69	GYGQSSYSKSYGQSQNTK-AYPTQPGQKGYSQQSSK-a9-b9	FUS-K9	FUS-K9	intra-protein xl	69	32	0.75	28.93	0.015	75 mM KCl	3
FUS-K9:32:x:FUS-K9:78	SYGQSQNTKGYGTQSTPQK-AYPTQPGQKGYSQQSSK-a9-b9	FUS-K9	FUS-K9	intra-protein xl	78	32	0.6	25.75	0.018	75 mM KCl	2
FUS-K9:345:x:FUS-K9:349	KTGQPMINLYTDR-QIGIIKTNK-a1-b6	FUS-K9	FUS-K9	intra-protein xl	349	345	0	37.02	0	75 mM KCl	3
FUS-K9:345:x:FUS-K9:349	KTGQPMINLYTDR-QIGIIKTNK-a1-b6	FUS-K9	FUS-K9	intra-protein xl	349	345	0	35.72	0	500 mM KCl	3
FUS-K9:349:x:FUS-K9:460	AGDWKCPNPTCENMNFSWR-KTGQPMINLYTDR-a5-b1	FUS-K9	FUS-K9	intra-protein xl	460	349	0	31.75	0	75 mM KCl	2
FUS-K9:365:x:FUS-K9:398	EFSGNPIKVSFATR-ETGKLK-a8-b4	FUS-K9	FUS-K9	intra-protein xl	398	365	0	34.09	0	500 mM KCl	3
FUS-K9:365:x:FUS-K9:398	EFSGNPIKVSFATR-ETGKLK-a8-b4	FUS-K9	FUS-K9	intra-protein xl	398	365	0	33.79	0	75 mM KCl	3
FUS-K9:367:x:FUS-K9:390	AAIDWFDGKEFSGNPIK-LKGEATVSFDDPPSAK-a9-b2	FUS-K9	FUS-K9	intra-protein xl	390	367	0.11	43.53	0	75 mM KCl	3
FUS-K9:367:x:FUS-K9:398	LKGEATVSFDDPPSAK-EFSGNPIKVSFATR-a2-b8	FUS-K9	FUS-K9	intra-protein xl	367	398	0	46.39	0	75 mM KCl	3
FUS-K9:367:x:FUS-K9:398	LKGEATVSFDDPPSAK-EFSGNPIKVSFATR-a2-b8	FUS-K9	FUS-K9	intra-protein xl	367	398	0	40.15	0	500 mM KCl	3
FUS-K9:367:x:FUS-K9:460	AGDWKCPNPTCENMNFSWR-LKGEATVSFDDPPSAK-a5-b2	FUS-K9	FUS-K9	intra-protein xl	460	367	0	33.72	0	75 mM KCl	2
FUS-K9:367:x:FUS-K9:460	AGDWKCPNPTCENMNFSWR-LKGEATVSFDDPPSAK-a5-b2	FUS-K9	FUS-K9	intra-protein xl	460	367	0	32.05	0	500 mM KCl	2
FUS-K9:367:x:FUS-K9:481	NECNQCKAPKPDGPGGGPGGSHMGGNYGDDR-LKGEATVSFDDPPSAK-a7-b2	FUS-K9	FUS-K9	intra-protein xl	481	367	0.91	26.22	0.015	500 mM KCl	2
FUS-K9:367:x:FUS-K9:484	APKPDGPGGGPGGSHMGGNYGDDR-LKGEATVSFDDPPSAK-a3-b2	FUS-K9	FUS-K9	intra-protein xl	484	367	0	31.26	0	500 mM KCl	3
FUS-K9:367:x:FUS-K9:543	LKGEATVSFDDPPSAK-GGFGPGKMDSR-a2-b7	FUS-K9	FUS-K9	intra-protein xl	367	543	0.28	43.81	0	500 mM KCl	3
FUS-K9:367:x:FUS-K9:543	LKGEATVSFDDPPSAK-GGFGPGKMDSR-a2-b7	FUS-K9	FUS-K9	intra-protein xl	367	543	0.31	41.19	0	75 mM KCl	3
FUS-K9:367:x:FUS-K9:88	GYGTQSTPQKGYGSTGGYGK-LKGEATVSFDDPPSAK-a10-b2	FUS-K9	FUS-K9	intra-protein xl	88	367	0.81	27	0.018	75 mM KCl	2
FUS-K9:390:x:FUS-K9:390	AAIDWFDGKEFSGNPIK-AAIDWFDGKEFSGNPIK-a9-b9	FUS-K9	FUS-K9	intra-protein xl	390	390	0	32.68	0	75 mM KCl	3
FUS-K9:40:x:FUS-K9:60	GYSQSTDTSKGYGQSSYSK-GYSQQSSKQPYGQQSYSK-a10-b8	FUS-K9	FUS-K9	intra-protein xl	60	40	0.64	50.18	0	500 mM KCl	3
FUS-K9:40:x:FUS-K9:60	GYSQSTDTSKGYGQSSYSK-GYSQQSSKQPYGQQSYSK-a10-b8	FUS-K9	FUS-K9	intra-protein xl	60	40	0.64	46.06	0	75 mM KCl	3
FUS-K9:40:x:FUS-K9:88	GYGTQSTPQKGYGSTGGYGK-GYSQQSSKQPYGQQSYSK-a10-b8	FUS-K9	FUS-K9	intra-protein xl	88	40	0.46	27.33	0.018	75 mM KCl	2
FUS-K9:481:x:FUS-K9:543	NECNQCKAPKPDGPGGGPGGSHMGGNYGDDR-GGFGPGKMDSR-a7-b7	FUS-K9	FUS-K9	intra-protein xl	481	543	0.65	36.76	0	500 mM KCl	3
FUS-K9:481:x:FUS-K9:543	NECNQCKAPKPDGPGGGPGGSHMGGNYGDDR-GGFGPGKMDSR-a7-b7	FUS-K9	FUS-K9	intra-protein xl	481	543	0.7	34.8	0	75 mM KCl	2
FUS-K9:484:x:FUS-K9:543	APKPDGPGGGPGGSHMGGNYGDDR-GGFGPGKMDSR-a3-b7	FUS-K9	FUS-K9	intra-protein xl	484	543	0.38	31.87	0	500 mM KCl	3
FUS-K9:484:x:FUS-K9:543	APKPDGPGGGPGGSHMGGNYGDDR-GGFGPGKMDSR-a3-b7	FUS-K9	FUS-K9	intra-protein xl	484	543	0.37	30.51	0	75 mM KCl	3
FUS-K9:50:x:FUS-K9:69	QPYGQQSYSKGYSQSTDTSK-GYGQSSYSKSYGQSQNTK-a10-b9	FUS-K9	FUS-K9	intra-protein xl	50	69	0.44	35.58	0	75 mM KCl	2
FUS-K9:50:x:FUS-K9:69	QPYGQQSYSKGYSQSTDTSK-GYGQSSYSKSYGQSQNTK-a10-b9	FUS-K9	FUS-K9	intra-protein xl	50	69	0.38	31.99	0	500 mM KCl	3
FUS-K9:543:x:FUS-K9:88	GYGTQSTPQKGYGSTGGYGK-GGFGPGKMDSR-a10-b7	FUS-K9	FUS-K9	intra-protein xl	88	543	0.62	35.5	0	75 mM KCl	3
FUS-K9:60:x:FUS-K9:78	GYSQSTDTSKGYGQSSYSK-SYGQSQNTKGYGTQSTPQK-a10-b9	FUS-K9	FUS-K9	intra-protein xl	60	78	0.62	51.34	0	75 mM KCl	3
FUS-K9:60:x:FUS-K9:78	GYSQSTDTSKGYGQSSYSK-SYGQSQNTKGYGTQSTPQK-a10-b9	FUS-K9	FUS-K9	intra-protein xl	60	78	0.64	48.32	0	500 mM KCl	3
FUS-K9:60:x:FUS-K9:88	GYGTQSTPQKGYGSTGGYGK-GYSQSTDTSKGYGQSSYSK-a10-b10	FUS-K9	FUS-K9	intra-protein xl	88	60	0.49	34.38	0	75 mM KCl	2
FUS-K9:69:x:FUS-K9:88	GYGTQSTPQKGYGSTGGYGK-GYGQSSYSKSYGQSQNTK-a10-b9	FUS-K9	FUS-K9	intra-protein xl	88	69	0.66	34.03	0	500 mM KCl	3
FUS-K9:69:x:FUS-K9:88	GYGTQSTPQKGYGSTGGYGK-GYGQSSYSKSYGQSQNTK-a10-b9	FUS-K9	FUS-K9	intra-protein xl	88	69	0.62	33.26	0	75 mM KCl	3
FUS-K9:69:x:FUS-K9:98	GYGQSSYSKSYGQSQNTK-GYGSTGGYGKSSQSSQSK-a9-b10	FUS-K9	FUS-K9	intra-protein xl	69	98	0.68	41.27	0	75 mM KCl	3
FUS-K9:69:x:FUS-K9:98	GYGQSSYSKSYGQSQNTK-GYGSTGGYGKSSQSSQSK-a9-b10	FUS-K9	FUS-K9	intra-protein xl	69	98	0.66	40.74	0	500 mM KCl	2
FUS-K9:78:x:FUS-K9:98	SYGQSQNTKGYGTQSTPQK-GYGSTGGYGKSSQSSQSK-a9-b10	FUS-K9	FUS-K9	intra-protein xl	78	98	0.58	46.81	0	500 mM KCl	3
FUS-K9:78:x:FUS-K9:98	SYGQSQNTKGYGTQSTPQK-GYGSTGGYGKSSQSSQSK-a9-b10	FUS-K9	FUS-K9	intra-protein xl	78	98	0	44.31	0	75 mM KCl	3
HspB8::x:HspB8:	ZGPLGSMADGQMPFSCHYPSR-ZGPLGSMADGQMPFSCHYPSR-a1-b1	HspB8	HspB8	intra-protein xl	1	1	0	47.49	0	500 mM KCl	3
HspB8::x:HspB8:	ZGPLGSMADGQMPFSCHYPSR-ZGPLGSMADGQMPFSCHYPSR-a1-b1	HspB8	HspB8	intra-protein xl	1	1	0	46.11	0	75 mM KCl	3
HspB8::x:HspB8:102	TPPPFPGEPWKVCVNVHSFKPEELMVK-ZGPLGSMADGQMPFSCHYPSR-a11-b1	HspB8	HspB8	intra-protein xl	102	1	0.16	33.67	0	75 mM KCl	3
HspB8::x:HspB8:102	TPPPFPGEPWKVCVNVHSFKPEELMVK-ZGPLGSMADGQMPFSCHYPSR-a11-b1	HspB8	HspB8	intra-protein xl	102	1	0.17	29.97	0.011	500 mM KCl	3
HspB8::x:HspB8:111	ZGPLGSMADGQMPFSCHYPSR-VCVNVHSFKPEELMVK-a1-b9	HspB8	HspB8	intra-protein xl	1	111	0.16	47.89	0	75 mM KCl	3
HspB8::x:HspB8:111	ZGPLGSMADGQMPFSCHYPSR-VCVNVHSFKPEELMVK-a1-b9	HspB8	HspB8	intra-protein xl	1	111	0.09	41.11	0	500 mM KCl	3
HspB8::x:HspB8:118	ZGPLGSMADGQMPFSCHYPSR-VCVNVHSFKPEELMVKTK-a1-b16	HspB8	HspB8	intra-protein xl	1	118	0.31	47.18	0	500 mM KCl	3
HspB8::x:HspB8:118	ZGPLGSMADGQMPFSCHYPSR-VCVNVHSFKPEELMVKTK-a1-b16	HspB8	HspB8	intra-protein xl	1	118	0.4	41.31	0	75 mM KCl	3
HspB8::x:HspB8:120	ZGPLGSMADGQMPFSCHYPSR-TKDGYVEVSGKHEEK-a1-b2	HspB8	HspB8	intra-protein xl	1	120	0.37	44.21	0	75 mM KCl	3
HspB8::x:HspB8:120	ZGPLGSMADGQMPFSCHYPSR-TKDGYVEVSGKHEEK-a1-b2	HspB8	HspB8	intra-protein xl	1	120	0.26	40.65	0	500 mM KCl	3
HspB8::x:HspB8:129	ZGPLGSMADGQMPFSCHYPSR-DGYVEVSGKHEEK-a1-b9	HspB8	HspB8	intra-protein xl	1	129	0	43.78	0	75 mM KCl	3
HspB8::x:HspB8:129	ZGPLGSMADGQMPFSCHYPSR-DGYVEVSGKHEEK-a1-b9	HspB8	HspB8	intra-protein xl	1	129	0.56	43.36	0	500 mM KCl	3
HspB8::x:HspB8:133	ZGPLGSMADGQMPFSCHYPSR-HEEKQQEGGIVSK-a1-b4	HspB8	HspB8	intra-protein xl	1	133	0	40.13	0	500 mM KCl	3
HspB8::x:HspB8:133	ZGPLGSMADGQMPFSCHYPSR-HEEKQQEGGIVSK-a1-b4	HspB8	HspB8	intra-protein xl	1	133	0.76	37.61	0	75 mM KCl	3
HspB8::x:HspB8:142	ZGPLGSMADGQMPFSCHYPSR-QQEGGIVSKNFTK-a1-b9	HspB8	HspB8	intra-protein xl	1	142	0.55	28.44	0	500 mM KCl	2
HspB8::x:HspB8:142	ZGPLGSMADGQMPFSCHYPSR-QQEGGIVSKNFTK-a1-b9	HspB8	HspB8	intra-protein xl	1	142	0.59	26.83	0.015	75 mM KCl	3
HspB8:111:x:HspB8:120	VCVNVHSFKPEELMVK-TKDGYVEVSGK-a9-b2	HspB8	HspB8	intra-protein xl	111	120	0.75	45.82	0	75 mM KCl	3
HspB8:111:x:HspB8:120	VCVNVHSFKPEELMVK-TKDGYVEVSGK-a9-b2	HspB8	HspB8	intra-protein xl	111	120	0.73	44.73	0	500 mM KCl	3
HspB8:111:x:HspB8:129	VCVNVHSFKPEELMVK-DGYVEVSGKHEEK-a9-b9	HspB8	HspB8	intra-protein xl	111	129	0.64	41.83	0	500 mM KCl	3
HspB8:111:x:HspB8:129	VCVNVHSFKPEELMVK-DGYVEVSGKHEEK-a9-b9	HspB8	HspB8	intra-protein xl	111	129	0.62	39.71	0	75 mM KCl	3
HspB8:111:x:HspB8:133	VCVNVHSFKPEELMVK-HEEKQQEGGIVSK-a9-b4	HspB8	HspB8	intra-protein xl	111	133	0.58	42.41	0	75 mM KCl	3
HspB8:111:x:HspB8:133	VCVNVHSFKPEELMVK-HEEKQQEGGIVSK-a9-b4	HspB8	HspB8	intra-protein xl	111	133	0.67	40.87	0	500 mM KCl	3
HspB8:111:x:HspB8:142	VCVNVHSFKPEELMVK-QQEGGIVSKNFTK-a9-b9	HspB8	HspB8	intra-protein xl	111	142	0.65	28.27	0.009	500 mM KCl	3
HspB8:111:x:HspB8:142	VCVNVHSFKPEELMVK-QQEGGIVSKNFTK-a9-b9	HspB8	HspB8	intra-protein xl	111	142	0.68	27.67	0.007	75 mM KCl	3
HspB8:118:x:HspB8:120	VCVNVHSFKPEELMVKTK-TKDGYVEVSGK-a16-b2	HspB8	HspB8	intra-protein xl	118	120	0	28.8	0.015	75 mM KCl	3
HspB8:118:x:HspB8:129	VCVNVHSFKPEELMVKTK-DGYVEVSGKHEEK-a16-b9	HspB8	HspB8	intra-protein xl	118	129	0.52	39.04	0	500 mM KCl	3
HspB8:118:x:HspB8:129	VCVNVHSFKPEELMVKTK-DGYVEVSGKHEEK-a16-b9	HspB8	HspB8	intra-protein xl	118	129	0.66	38.67	0	75 mM KCl	3
HspB8:118:x:HspB8:133	VCVNVHSFKPEELMVKTK-HEEKQQEGGIVSK-a16-b4	HspB8	HspB8	intra-protein xl	118	133	0.1	34.03	0	500 mM KCl	3
HspB8:118:x:HspB8:133	VCVNVHSFKPEELMVKTK-HEEKQQEGGIVSK-a16-b4	HspB8	HspB8	intra-protein xl	118	133	0	32.12	0	75 mM KCl	3
HspB8:120:x:HspB8:120	TKDGYVEVSGK-TKDGYVEVSGK-a2-b2	HspB8	HspB8	intra-protein xl	120	120	0.74	40.02	0	75 mM KCl	3
HspB8:120:x:HspB8:129	DGYVEVSGKHEEK-TKDGYVEVSGK-a9-b2	HspB8	HspB8	intra-protein xl	129	120	0.71	50.21	0	500 mM KCl	3
HspB8:120:x:HspB8:129	DGYVEVSGKHEEK-TKDGYVEVSGK-a9-b2	HspB8	HspB8	intra-protein xl	129	120	0.73	48.45	0	75 mM KCl	3
HspB8:120:x:HspB8:133	HEEKQQEGGIVSK-TKDGYVEVSGK-a4-b2	HspB8	HspB8	intra-protein xl	133	120	0.58	54.97	0	75 mM KCl	3
HspB8:120:x:HspB8:133	HEEKQQEGGIVSK-TKDGYVEVSGK-a4-b2	HspB8	HspB8	intra-protein xl	133	120	0	44.34	0	500 mM KCl	3
HspB8:120:x:HspB8:142	QQEGGIVSKNFTK-TKDGYVEVSGK-a9-b2	HspB8	HspB8	intra-protein xl	142	120	0.57	31.41	0	75 mM KCl	3
HspB8:120:x:HspB8:142	QQEGGIVSKNFTK-TKDGYVEVSGK-a9-b2	HspB8	HspB8	intra-protein xl	142	120	0.64	30.45	0	500 mM KCl	3
HspB8:129:x:HspB8:129	TKDGYVEVSGKHEEK-DGYVEVSGKHEEK-a11-b9	HspB8	HspB8	intra-protein xl	129	129	0.72	42.38	0	75 mM KCl	3
HspB8:129:x:HspB8:129	DGYVEVSGKHEEK-DGYVEVSGKHEEK-a9-b9	HspB8	HspB8	intra-protein xl	129	129	0.69	37.33	0	500 mM KCl	3
HspB8:129:x:HspB8:133	DGYVEVSGKHEEK-HEEKQQEGGIVSK-a9-b4	HspB8	HspB8	intra-protein xl	129	133	0.84	40.78	0	75 mM KCl	3
HspB8:129:x:HspB8:133	DGYVEVSGKHEEK-HEEKQQEGGIVSK-a9-b4	HspB8	HspB8	intra-protein xl	129	133	0.77	38.11	0	500 mM KCl	3
HspB8:129:x:HspB8:142	DGYVEVSGKHEEK-QQEGGIVSKNFTK-a9-b9	HspB8	HspB8	intra-protein xl	129	142	0.74	35.04	0	75 mM KCl	3
HspB8:129:x:HspB8:142	DGYVEVSGKHEEK-QQEGGIVSKNFTK-a9-b9	HspB8	HspB8	intra-protein xl	129	142	0.82	28.62	0	500 mM KCl	3
HspB8:133:x:HspB8:133	HEEKQQEGGIVSK-HEEKQQEGGIVSK-a4-b4	HspB8	HspB8	intra-protein xl	133	133	0.85	39.7	0	75 mM KCl	3
HspB8:133:x:HspB8:133	DGYVEVSGKHEEKQQEGGIVSK-HEEKQQEGGIVSK-a13-b4	HspB8	HspB8	intra-protein xl	133	133	0.38	29.06	0.011	500 mM KCl	2
HspB8:133:x:HspB8:142	HEEKQQEGGIVSK-QQEGGIVSKNFTK-a4-b9	HspB8	HspB8	intra-protein xl	133	142	0.79	36.97	0	75 mM KCl	3
HspB8:142:x:HspB8:142	QQEGGIVSKNFTK-QQEGGIVSKNFTK-a9-b9	HspB8	HspB8	intra-protein xl	142	142	0.72	27.43	0.018	75 mM KCl	3
FUS-K9:106	SSQSSQSKSYGQQSK-K8-156	FUS-K9	-	monolink	106		0.5	39.8	0	500 mM KCl	2
FUS-K9:106	SSQSSQSKSYGQQSK-K8-156	FUS-K9	-	monolink	106		0.47	39.75	0	75 mM KCl	2
FUS-K9:120	SYPGYGKQQPAPSSTSK-K7-155	FUS-K9	-	monolink	120		0	42.38	0	500 mM KCl	3
FUS-K9:120	SYPGYGKQQPAPSSTSK-K7-156	FUS-K9	-	monolink	120		0.14	42.26	0	75 mM KCl	3
FUS-K9:130	QQPAPSSTSKGSYGSSSQSK-K10-155	FUS-K9	-	monolink	130		0	39.54	0	500 mM KCl	3
FUS-K9:130	QQPAPSSTSKGSYGSSSQSK-K10-156	FUS-K9	-	monolink	130		0	38.79	0	75 mM KCl	3
FUS-K9:140	GSYGSSSQSKSSYGQPQSGK-K10-155	FUS-K9	-	monolink	140		0.12	45.14	0	500 mM KCl	3
FUS-K9:140	GSYGSSSQSKSSYGQPQSGK-K10-155	FUS-K9	-	monolink	140		0.29	45.07	0	75 mM KCl	3
FUS-K9:150	SSYGQPQSGKSYSQQPSYGK-K10-156	FUS-K9	-	monolink	150		0	39.27	0	75 mM KCl	3
FUS-K9:150	SSYGQPQSGKSYSQQPSYGK-K10-155	FUS-K9	-	monolink	150		0	38.66	0	500 mM KCl	3
FUS-K9:16	NDYTQQKATQSYGK-K7-156	FUS-K9	-	monolink	16		0.27	41.89	0	75 mM KCl	3
FUS-K9:16	NDYTQQKATQSYGK-K7-155	FUS-K9	-	monolink	16		0.19	41.47	0	500 mM KCl	3
FUS-K9:160	SYSQQPSYGKGQQQSYGK-K10-155	FUS-K9	-	monolink	160		0.05	39.59	0	75 mM KCl	3
FUS-K9:160	SYSQQPSYGKGQQQSYGK-K10-156	FUS-K9	-	monolink	160		0.07	37.63	0	500 mM KCl	3
FUS-K9:168	GQQQSYGKQQQSYNPPQK-K8-155	FUS-K9	-	monolink	168		0	38.78	0	75 mM KCl	3
FUS-K9:178	QQQSYNPPQKGYEQQNQYNK-K10-155	FUS-K9	-	monolink	178		0.06	38.07	0	500 mM KCl	3
FUS-K9:178	QQQSYNPPQKGYEQQNQYNK-K10-156	FUS-K9	-	monolink	178		0.03	35.44	0	75 mM KCl	3
FUS-K9:188	GYEQQNQYNKSSSGGGGGGK-K10-156	FUS-K9	-	monolink	188		0.16	47.6	0	75 mM KCl	3
FUS-K9:188	GYEQQNQYNKSSSGGGGGGK-K10-155	FUS-K9	-	monolink	188		0.19	45.72	0	500 mM KCl	3
FUS-K9:206	GGGGNYGKQDQSSMSSGK-K8-155	FUS-K9	-	monolink	206		0.16	46	0	500 mM KCl	3
FUS-K9:206	GGGGNYGKQDQSSMSSGK-K8-155	FUS-K9	-	monolink	206		0.16	45.76	0	75 mM KCl	3
FUS-K9:216	QDQSSMSSGKGGSGGGYGK-K10-155	FUS-K9	-	monolink	216		0.21	35.43	0	75 mM KCl	3
FUS-K9:216	QDQSSMSSGKGGSGGGYGK-K10-156	FUS-K9	-	monolink	216		0.18	33.97	0	500 mM KCl	2
FUS-K9:225	GGSGGGYGKNQDQSGGGGK-K9-156	FUS-K9	-	monolink	225		0.26	38.95	0	500 mM KCl	3
FUS-K9:225	GGSGGGYGKNQDQSGGGGK-K9-156	FUS-K9	-	monolink	225		0.2	37.27	0	75 mM KCl	2
FUS-K9:23	ATQSYGKAYPTQPGQK-K7-156	FUS-K9	-	monolink	23		0.12	41.76	0	75 mM KCl	3
FUS-K9:23	ATQSYGKAYPTQPGQK-K7-155	FUS-K9	-	monolink	23		0.13	40.85	0	500 mM KCl	3
FUS-K9:235	NQDQSGGGGKSGGYGQQASDR-K10-156	FUS-K9	-	monolink	235		0	57.13	0	75 mM KCl	3
FUS-K9:235	NQDQSGGGGKSGGYGQQASDR-K10-155	FUS-K9	-	monolink	235		0	49.37	0	500 mM KCl	3
FUS-K9:32	AYPTQPGQKGYSQQSSK-K9-156	FUS-K9	-	monolink	32		0.13	39.91	0	75 mM KCl	3
FUS-K9:32	AYPTQPGQKGYSQQSSK-K9-156	FUS-K9	-	monolink	32		0	39.84	0	500 mM KCl	3
FUS-K9:345	QIGIIKTNKK-K6-156	FUS-K9	-	monolink	345		0	37.09	0	75 mM KCl	3
FUS-K9:345	QIGIIKTNKK-K6-156	FUS-K9	-	monolink	345		0.54	33.74	0	500 mM KCl	3
FUS-K9:349	KTGQPMINLYTDR-K1-155	FUS-K9	-	monolink	349		0	42.87	0	500 mM KCl	3
FUS-K9:349	KTGQPMINLYTDRETGK-K1-155	FUS-K9	-	monolink	349		0.15	42.26	0	75 mM KCl	3
FUS-K9:365	TGQPMINLYTDRETGKLK-K16-155	FUS-K9	-	monolink	365		0	33.82	0	500 mM KCl	3
FUS-K9:365	TGQPMINLYTDRETGKLK-K16-156	FUS-K9	-	monolink	365		0	27.6	0	75 mM KCl	3
FUS-K9:367	LKGEATVSFDDPPSAK-K2-156	FUS-K9	-	monolink	367		0	46.58	0	75 mM KCl	3
FUS-K9:367	LKGEATVSFDDPPSAK-K2-156	FUS-K9	-	monolink	367		0	44.97	0	500 mM KCl	3
FUS-K9:381	GEATVSFDDPPSAKAAIDWFDGK-K14-156	FUS-K9	-	monolink	381		0.09	46.11	0	75 mM KCl	3
FUS-K9:381	GEATVSFDDPPSAKAAIDWFDGK-K14-155	FUS-K9	-	monolink	381		0.07	44.15	0	500 mM KCl	3
FUS-K9:390	AAIDWFDGKEFSGNPIK-K9-155	FUS-K9	-	monolink	390		0	55.83	0	500 mM KCl	3
FUS-K9:390	AAIDWFDGKEFSGNPIK-K9-155	FUS-K9	-	monolink	390		0	53.64	0	75 mM KCl	3
FUS-K9:398	EFSGNPIKVSFATR-K8-156	FUS-K9	-	monolink	398		0	51.32	0	75 mM KCl	3
FUS-K9:398	EFSGNPIKVSFATR-K8-156	FUS-K9	-	monolink	398		0	50.84	0	500 mM KCl	3
FUS-K9:40	GYSQQSSKQPYGQQSYSK-K8-156	FUS-K9	-	monolink	40		0.12	43.51	0	75 mM KCl	3
FUS-K9:40	GYSQQSSKQPYGQQSYSK-K8-155	FUS-K9	-	monolink	40		0.08	37.16	0	500 mM KCl	3
FUS-K9:460	AGDWKCPNPTCENMNFSWR-K5-155	FUS-K9	-	monolink	460		0	47.64	0	500 mM KCl	3
FUS-K9:460	AGDWKCPNPTCENMNFSWR-K5-155	FUS-K9	-	monolink	460		0.06	47.53	0	75 mM KCl	3
FUS-K9:481	NECNQCKAPKPDGPGGGPGGSHMGGNYGDDR-K7-155	FUS-K9	-	monolink	481		0.12	39.42	0	75 mM KCl	3
FUS-K9:481	NECNQCKAPKPDGPGGGPGGSHMGGNYGDDR-K7-155	FUS-K9	-	monolink	481		0.06	37.82	0	500 mM KCl	3
FUS-K9:484	APKPDGPGGGPGGSHMGGNYGDDRR-K3-155	FUS-K9	-	monolink	484		0	43.64	0	500 mM KCl	3
FUS-K9:484	APKPDGPGGGPGGSHMGGNYGDDRR-K3-155	FUS-K9	-	monolink	484		0	42.29	0	75 mM KCl	3
FUS-K9:50	QPYGQQSYSKGYSQSTDTSK-K10-156	FUS-K9	-	monolink	50		0.19	41.81	0	75 mM KCl	3
FUS-K9:50	QPYGQQSYSKGYSQSTDTSK-K10-156	FUS-K9	-	monolink	50		0.11	40.76	0	500 mM KCl	3
FUS-K9:60	GYSQSTDTSKGYGQSSYSK-K10-156	FUS-K9	-	monolink	60		0.14	49.2	0	75 mM KCl	3
FUS-K9:60	GYSQSTDTSKGYGQSSYSK-K10-155	FUS-K9	-	monolink	60		0.11	45.39	0	500 mM KCl	3
FUS-K9:69	GYGQSSYSKSYGQSQNTK-K9-156	FUS-K9	-	monolink	69		0.16	39.91	0	75 mM KCl	3
FUS-K9:69	GYGQSSYSKSYGQSQNTK-K9-155	FUS-K9	-	monolink	69		0.27	39.4	0	500 mM KCl	2
FUS-K9:78	SYGQSQNTKGYGTQSTPQK-K9-156	FUS-K9	-	monolink	78		0.13	44.03	0	75 mM KCl	3
FUS-K9:78	SYGQSQNTKGYGTQSTPQK-K9-155	FUS-K9	-	monolink	78		0.15	40.58	0	500 mM KCl	3
FUS-K9:88	GYGTQSTPQKGYGSTGGYGK-K10-155	FUS-K9	-	monolink	88		0.08	40.76	0	500 mM KCl	3
FUS-K9:88	GYGTQSTPQKGYGSTGGYGK-K10-156	FUS-K9	-	monolink	88		0.18	40.67	0	75 mM KCl	3
HspB8:	ZGPLGSMADGQMPFSCHYPSR-Z1-156	HspB8	-	monolink	1		0	37.36	0	75 mM KCl	3
HspB8:	ZGPLGSMADGQMPFSCHYPSR-Z1-156	HspB8	-	monolink	1		0	34.72	0	500 mM KCl	3
HspB8:102	TPPPFPGEPWKVCVNVHSFKPEELMVK-K11-156	HspB8	-	monolink	102		0	33.23	0	500 mM KCl	3
HspB8:102	TPPPFPGEPWKVCVNVHSFKPEELMVK-K11-155	HspB8	-	monolink	102		0	32.9	0	75 mM KCl	3
HspB8:111	VCVNVHSFKPEELMVK-K9-156	HspB8	-	monolink	111		0	42.62	0	75 mM KCl	3
HspB8:111	VCVNVHSFKPEELMVK-K9-155	HspB8	-	monolink	111		0	42.38	0	500 mM KCl	3
HspB8:118	VCVNVHSFKPEELMVKTK-K16-156	HspB8	-	monolink	118		0	45.92	0	500 mM KCl	3
HspB8:118	VCVNVHSFKPEELMVKTK-K16-155	HspB8	-	monolink	118		0	45.09	0	75 mM KCl	3
HspB8:120	TKDGYVEVSGKHEEK-K2-156	HspB8	-	monolink	120		0.13	42.31	0	75 mM KCl	3
HspB8:120	TKDGYVEVSGKHEEK-K2-156	HspB8	-	monolink	120		0	41.22	0	500 mM KCl	3
HspB8:129	DGYVEVSGKHEEKQQEGGIVSK-K9-155	HspB8	-	monolink	129		0.22	48.26	0	500 mM KCl	3
HspB8:129	DGYVEVSGKHEEKQQEGGIVSK-K9-155	HspB8	-	monolink	129		0.07	43.33	0	75 mM KCl	3
HspB8:133	DGYVEVSGKHEEKQQEGGIVSK-K13-155	HspB8	-	monolink	133		0.04	51.1	0	75 mM KCl	3
HspB8:133	HEEKQQEGGIVSK-K4-155	HspB8	-	monolink	133		0.32	50.94	0	500 mM KCl	3
HspB8:142	QQEGGIVSKNFTK-K9-156	HspB8	-	monolink	142		0	49.01	0	75 mM KCl	3
HspB8:142	QQEGGIVSKNFTK-K9-156	HspB8	-	monolink	142		0	44.57	0	500 mM KCl	3
HspB8:146	QQEGGIVSKNFTKK-K13-156	HspB8	-	monolink	146		0.28	34.79	0	500 mM KCl	3
HspB8:146	QQEGGIVSKNFTKK-K13-156	HspB8	-	monolink	146		0.21	31.36	0	75 mM KCl	2
