# Supplementary material for: HspB8 prevents aberrant phase transitions of FUS by chaperoning its folded RNA-binding domain
Source: eLife. 2021 Sep 6;10:e69377. doi: 10.7554/eLife.69377 (PMC8510580; doi:10.7554/eLife.69377)
Supplement: Supplementary file 4. [file elife-69377-supp4.xlsx]

## Sheet: Legend
Legends for Supplemental Data 4
Supplemental Table 1. FUSB8 Centrifuge 1 Experiment Crosslink Quantification. Related to Figure 5B, S3G
Supplemental Table 2. FUSB8 Centrifuge 2 Experiment Crosslink Quantification. Related to Figure 5B, S3G
Supplemental Table 3. FUSB8 Centrifuge 3 Experiment Crosslink Quantification. Related to Figure 5B, S3G
Supplemental Table 4. FUSB8 Salt Experiment Crosslink Quantification. Related to Figure 5B, S3G
Supplemental Table 5. FUS-K9B8 Salt Experiment Crosslink Quantification. Related to Figure 5B, S3G
Legend referring to Tables S1, S2, S3, S4 and S5
uxID	unique lysine to lysine crosslinking site, includes crosslinked protein names and absolute position of crosslinked lysine. All peptides linking the same lysines (different cleavage sites, charge states and heavy/light pairs) belong to a single uxID
experiment	the condition used for relative quantification relative to the reference condition
link_type	type of linker attachment (inter-protein crosslink, intra-protein crosslink, looplink or monolink).Looplink, a link between two lysines within one peptide.
ms1_area_sum	log2 converted peak area of the extracted total ion chromatogram (MS1 intensity along retention time) for the corresponding uxID within an experiment. Peak areas of different peptides connecting the same lysines are summed up but for a light/heavy pair as well as biological replicates of the same peptide the mean is taken.
imputed	a value between 0-2 indicating the fraction of imputed peptide observations for a given uxID corresponding to the current experiment condition
ms1_area_sum_ref	log2 converted peak area of the extracted total ion chromatogram (MS1 intensity along retention time) for the corresponding uxID within the reference experiment. Peak areas of different peptides connecting the same lysines are summed up but for a light/heavy pair as well as biological replicates of the same peptide the mean is taken.
imputed_ref	a value between 0-2 indicating the fraction of imputed peptide observations for a given uxID corresponding to the reference experiment condition
log2ratio	the log2 ratio of the experiment vs. the reference experiment. Calculated as difference between ms1_area_sum and ms1_area_sum_ref
reference experiment	the condition which was used as reference for relative quantification
pvalue	p-value as calculated by a two-sided t-test using the peptide observations of the log2 converted peak area of the experiment and reference experiment as input (light/heavy pairs and biological replicates as input observations)
FDR	p-values corrected for multiple testing following the Benjamini–Hochberg procedure

## Sheet: Table S1
Supplemental Table 1. FUSB8 Centrifuge 1 Experiment Crosslink Quantification. Related to Figure 5B, S3G
Quantifiaction for each unique crosslinking site of centrifuge 1 experiment shown in Supplementary Data 3 Table S1
uxID	experiment	link_type	ms1_area_sum	imputed	ms1_area_sum_ref	imputed_ref	log2ratio	reference experiment	pvalue	FDR
FUS:269:x:FUS:317	Pellet	xlink	25.4853	0	24.5996	0	0.885657	Supernatant	0.0232599	0.0283771
FUS:269:x:FUS:321	Pellet	xlink	22.2391	0.333333	25.8073	0	-3.5682	Supernatant	5e-07	2.03e-06
FUS:269:x:FUS:339	Pellet	xlink	27.625	0	24.5151	0	3.10982	Supernatant	4.41e-07	2.03e-06
FUS:269:x:FUS:362	Pellet	xlink	21.8685	0.833333	25.0684	0	-3.19987	Supernatant	5.81e-06	1.77e-05
FUS:269:x:FUS:370	Pellet	xlink	27.902	0	27.2725	0	0.629501	Supernatant	0.0125466	0.0170076
FUS:269:x:HspB8:120	Pellet	xlink	26.3622	0	20.1124	0.25	6.24975	Supernatant	2.45e-07	1.3e-06
FUS:317:x:FUS:321	Pellet	xlink	31.9	0	32.4747	0	-0.574646	Supernatant	0.000108745	0.000221114
FUS:317:x:FUS:337	Pellet	xlink	26.5544	0	21.5084	1	5.04594	Supernatant	8.74e-09	1.33e-07
FUS:317:x:FUS:339	Pellet	xlink	26.8348	0	22.6862	0	4.14853	Supernatant	3.39e-10	2.07e-08
FUS:320:x:FUS:321	Pellet	looplink	21.9916	1	26.9141	0	-4.92253	Supernatant	5.59e-08	4.87e-07
FUS:337:x:FUS:339	Pellet	looplink	21.8084	1	28.1214	0	-6.31305	Supernatant	1.25e-06	4.22e-06
FUS:337:x:FUS:339	Pellet	xlink	26.8236	0	21.8558	1	4.96784	Supernatant	1.77e-08	2.12e-07
FUS:337:x:FUS:370	Pellet	xlink	29.8072	0	29.1846	0	0.622552	Supernatant	0.00876477	0.0124337
FUS:337:x:HspB8:120	Pellet	xlink	28.548	0	21.7334	1	6.81452	Supernatant	2.55e-07	1.3e-06
FUS:339:x:FUS:370	Pellet	xlink	29.2078	0	28.654	0	0.55377	Supernatant	0.0209608	0.026094
FUS:339:x:FUS:432	Pellet	xlink	21.7768	1	24.5303	0	-2.75341	Supernatant	5.93e-05	0.000139073
FUS:339:x:FUS:453	Pellet	xlink	21.5683	1	24.5132	0	-2.94485	Supernatant	4.97e-07	2.03e-06
FUS:339:x:FUS:456	Pellet	xlink	21.5381	0.666667	22.7885	0	-1.25041	Supernatant	0.0149143	0.0197777
FUS:339:x:FUS:515	Pellet	xlink	24.8524	0	24.8529	0	-0.000510545	Supernatant	0.9977	0.9977
FUS:339:x:HspB8:120	Pellet	xlink	25.4848	0	22.1947	1	3.29015	Supernatant	9.29e-08	5.88e-07
FUS:339:x:HspB8:133	Pellet	xlink	22.9745	0	20.5005	0.75	2.474	Supernatant	0.0176695	0.0229328
FUS:353	Pellet	monolink	27.0814	0	25.2837	0	1.79771	Supernatant	5.52e-05	0.000134754
FUS:362	Pellet	monolink	27.2589	0	28.483	0	-1.22403	Supernatant	0.0552161	0.0623737
FUS:362:x:FUS:370	Pellet	looplink	27.3431	0	28.7214	0	-1.37828	Supernatant	0.0486863	0.0560352
FUS:362:x:FUS:432	Pellet	xlink	21.749	1	24.0412	0	-2.29222	Supernatant	0.00373806	0.00584671
FUS:362:x:HspB8:129	Pellet	xlink	24.0131	0	22.1811	1	1.83194	Supernatant	0.031589	0.0377829
FUS:370	Pellet	monolink	28.8525	0	24.6951	1	4.1574	Supernatant	6.73e-08	5.13e-07
FUS:370:x:FUS:515	Pellet	xlink	23.9292	0.0833333	24.3448	0	-0.41554	Supernatant	0.573681	0.593128
FUS:370:x:HspB8:118	Pellet	xlink	27.3178	0	21.2175	0.0833333	6.10034	Supernatant	1.85e-05	4.9e-05
FUS:370:x:HspB8:120	Pellet	xlink	27.6754	0	21.9278	1	5.74761	Supernatant	2.09e-08	2.12e-07
FUS:370:x:HspB8:129	Pellet	xlink	27.9891	0	21.6157	1	6.37347	Supernatant	2.87e-09	5.84e-08
FUS:432	Pellet	monolink	25.2831	0.5	28.161	0	-2.87792	Supernatant	0.0020857	0.0035341
FUS:432:x:FUS:456	Pellet	xlink	21.8653	1	25.7156	0	-3.8503	Supernatant	5.03e-06	1.61e-05
FUS:432:x:FUS:515	Pellet	xlink	21.734	1	24.5353	0	-2.80133	Supernatant	0.00252439	0.00405984
FUS:453	Pellet	monolink	32.068	0	31.7658	0	0.302216	Supernatant	0.499482	0.525317
FUS:453:x:FUS:456	Pellet	looplink	32.5565	0	32.4803	0	0.0762011	Supernatant	0.971582	0.987775
FUS:453:x:FUS:515	Pellet	xlink	21.9461	1	25.2879	0	-3.34181	Supernatant	9.91e-06	2.75e-05
FUS:456	Pellet	monolink	33.6119	0	33.1283	0	0.483561	Supernatant	0.0198002	0.0251628
FUS:456:x:FUS:515	Pellet	xlink	22.0065	1	25.8715	0	-3.86504	Supernatant	6.25e-07	2.38e-06
FUS:515:x:HspB8:120	Pellet	xlink	24.7252	0	21.4802	1	3.24497	Supernatant	0.00638634	0.00950162
FUS:515:x:HspB8:129	Pellet	xlink	24.5721	0.0833333	23.3903	0	1.18185	Supernatant	0.233865	0.254746
HspB8:102	Pellet	monolink	33.9864	0	34.7385	0	-0.752155	Supernatant	0.00747733	0.0108599
HspB8:111	Pellet	monolink	32.9291	0	33.1632	0	-0.234079	Supernatant	0.0989664	0.109763
HspB8:111:x:HspB8:118	Pellet	looplink	30.844	0	31.7934	0	-0.949356	Supernatant	6.72e-05	0.000146343
HspB8:111:x:HspB8:120	Pellet	looplink	30.5363	0	31.4513	0	-0.915062	Supernatant	0.000912288	0.00163675
HspB8:111:x:HspB8:120	Pellet	xlink	25.3648	0	24.1376	0	1.22718	Supernatant	0.327476	0.350457
HspB8:111:x:HspB8:129	Pellet	xlink	33.078	0	33.6005	0	-0.522537	Supernatant	0.00178031	0.00310283
HspB8:111:x:HspB8:133	Pellet	xlink	26.3197	0	27.9203	0	-1.6006	Supernatant	0.000318926	0.00058953
HspB8:118	Pellet	monolink	32.9211	0	33.3094	0	-0.388293	Supernatant	0.0388422	0.0455649
HspB8:118:x:HspB8:120	Pellet	looplink	31.5369	0	32.0534	0	-0.516497	Supernatant	3.82e-05	9.72e-05
HspB8:118:x:HspB8:129	Pellet	xlink	33.3648	0	33.8413	0	-0.476508	Supernatant	0.000201552	0.000384209
HspB8:120	Pellet	monolink	32.8165	0	33.346	0	-0.529532	Supernatant	0.00507454	0.00773867
HspB8:120:x:HspB8:129	Pellet	xlink	31.3968	0	30.0364	0	1.36043	Supernatant	6.33e-05	0.000143119
HspB8:120:x:HspB8:133	Pellet	xlink	30.3737	0	27.4701	0	2.90355	Supernatant	9.64e-08	5.88e-07
HspB8:129	Pellet	monolink	31.0502	0	30.232	0	0.818189	Supernatant	0.0106442	0.0147567
HspB8:129:x:HspB8:129	Pellet	xlink	29.8207	0	28.2354	0	1.58525	Supernatant	0.000169762	0.000334048
HspB8:129:x:HspB8:133	Pellet	looplink	31.7147	0	30.4373	0	1.27742	Supernatant	0.00252908	0.00405984
HspB8:129:x:HspB8:133	Pellet	xlink	27.4057	0	21.2956	0	6.11006	Supernatant	2.39e-09	5.84e-08
HspB8:133	Pellet	monolink	31.2733	0	29.6071	0	1.6662	Supernatant	7.91e-05	0.000166339
HspB8:133:x:HspB8:133	Pellet	xlink	26.2376	0	20.0668	0.666667	6.17073	Supernatant	7.35e-07	2.64e-06
HspB8:133:x:HspB8:142	Pellet	looplink	28.2225	0	25.3962	0	2.82625	Supernatant	7.77e-06	2.26e-05

## Sheet: Table S2
Supplemental Table 2. FUSB8 Centrifuge 2 Experiment Crosslink Quantification. Related to Figure 5B, S3G
Quantifiaction for each unique crosslinking site of centrifuge 2 experiment shown in Supplementary Data 3 Table S1
uID	experiment	link_type	ms1_area_sum	imputed	ms1_area_sum_ref	imputed_ref	log2ratio	log2avg	referenceexperiment	pvalue	FDR
FUS:269:x:FUS:321	Pellet	xlink	25.4077	0.142857	26.4663	0	-1.05857	25.937	Supernatant	0.00105417	0.00179209
FUS:269:x:FUS:339	Pellet	xlink	27.3587	0	27.555	0	-0.196288	27.4568	Supernatant	0.964945	0.964945
FUS:269:x:FUS:362	Pellet	xlink	23.2482	0	25.8908	0	-2.64258	24.5695	Supernatant	6.44041e-05	0.000136859
FUS:269:x:FUS:432	Pellet	xlink	22.2194	1	26.3096	0	-4.0902	24.2645	Supernatant	9.17682e-06	2.51622e-05
FUS:269:x:FUS:453	Pellet	xlink	21.8304	1	22.6453	0.0833333	-0.814855	22.2379	Supernatant	0.223697	0.253523
FUS:269:x:FUS:456	Pellet	xlink	22.3819	0.285714	24.1107	0	-1.7288	23.2463	Supernatant	0.0541127	0.0718684
FUS:269:x:FUS:515	Pellet	xlink	21.5044	1	23.8115	0	-2.30713	22.6579	Supernatant	2.28563e-05	5.55081e-05
FUS:311	Pellet	monolink	26.8757	0.0714286	27.482	0	-0.606308	27.1789	Supernatant	0.634684	0.674352
FUS:311:x:FUS:317	Pellet	looplink	24.0338	0.285714	25.5938	0	-1.55997	24.8138	Supernatant	0.338919	0.374131
FUS:317:x:FUS:321	Pellet	xlink	33.2731	0	33.9451	0	-0.671953	33.6091	Supernatant	0.000241061	0.000445438
FUS:317:x:FUS:362	Pellet	xlink	26.6601	0	24.5888	0	2.07127	25.6245	Supernatant	2.87501e-06	9.39906e-06
FUS:317:x:FUS:515	Pellet	xlink	23.1797	0.214286	19.8566	0.25	3.32311	21.5181	Supernatant	1.47726e-05	3.69315e-05
FUS:320:x:FUS:321	Pellet	looplink	28.0245	0.142857	29.1009	0	-1.07644	28.5627	Supernatant	0.730399	0.766468
FUS:321	Pellet	monolink	30.5833	0.214286	30.7019	0	-0.118574	30.6426	Supernatant	1.07511e-06	4.5692e-06
FUS:321:x:FUS:339	Pellet	xlink	27.9552	0	23.5425	0.0833333	4.41269	25.7488	Supernatant	4.4325e-07	2.35477e-06
FUS:321:x:FUS:432	Pellet	xlink	23.8343	0.428571	27.2885	0	-3.45427	25.5614	Supernatant	0.000685194	0.0011886
FUS:321:x:FUS:453	Pellet	xlink	21.2327	0.642857	25.6069	0	-4.3742	23.4198	Supernatant	9.65273e-06	2.56401e-05
FUS:321:x:FUS:456	Pellet	xlink	21.9398	0.357143	24.3374	0	-2.39758	23.1386	Supernatant	4.52489e-05	9.86195e-05
FUS:321:x:HspB8:120	Pellet	xlink	21.385	0	20.0331	0.5	1.35187	20.709	Supernatant	0.180683	0.213307
FUS:337	Pellet	monolink	30.5577	0	29.3058	0	1.25188	29.9317	Supernatant	4.08073e-07	2.31241e-06
FUS:337:x:FUS:339	Pellet	looplink	29.4763	0	27.8789	0	1.59743	28.6776	Supernatant	0.000236675	0.000445438
FUS:337:x:FUS:370	Pellet	xlink	25.5017	0	27.5406	0	-2.03888	26.5211	Supernatant	0.00108286	0.00180476
FUS:339	Pellet	monolink	30.6823	0	28.9241	1	1.75824	29.8032	Supernatant	0.000155053	0.000313799
FUS:339:x:FUS:362	Pellet	xlink	28.0839	0	26.0197	0	2.06424	27.0518	Supernatant	2.28975e-07	1.52882e-06
FUS:339:x:FUS:370	Pellet	xlink	19.2478	0.428571	28.4845	0	-9.23671	23.8662	Supernatant	0.000487891	0.000882357
FUS:339:x:FUS:432	Pellet	xlink	22.0303	1	27.8557	0	-5.82544	24.943	Supernatant	7.22859e-06	2.0481e-05
FUS:339:x:FUS:453	Pellet	xlink	22.0738	0.214286	27.956	0	-5.8822	25.0149	Supernatant	5.93703e-07	2.8036e-06
FUS:339:x:FUS:456	Pellet	xlink	25.3054	0.142857	27.6339	0	-2.32843	26.4697	Supernatant	4.55596e-08	4.09973e-07
FUS:339:x:FUS:515	Pellet	xlink	26.358	0	25.9428	0	0.415135	26.1504	Supernatant	0.00820439	0.0120237
FUS:339:x:HspB8:	Pellet	xlink	27.1604	0.0714286	30.5723	0	-3.41188	28.8664	Supernatant	1.3962e-05	3.59628e-05
FUS:353	Pellet	monolink	30.8173	0	28.1064	0	2.71096	29.4618	Supernatant	1.72077e-06	6.35936e-06
FUS:353:x:FUS:362	Pellet	looplink	25.5565	0	25.2411	0	0.315446	25.3988	Supernatant	0.114452	0.138977
FUS:362	Pellet	monolink	30.2113	0.0714286	30.264	0	-0.0527842	30.2377	Supernatant	0.0586902	0.0767487
FUS:362:x:FUS:370	Pellet	looplink	29.7806	0	31.0411	0	-1.26046	30.4108	Supernatant	0.133363	0.15966
FUS:362:x:FUS:370	Pellet	xlink	26.6183	0	21.9713	1	4.64701	24.2948	Supernatant	2.20046e-09	2.79592e-08
FUS:362:x:FUS:432	Pellet	xlink	22.323	1	23.0428	0.25	-0.719821	22.6829	Supernatant	0.512549	0.558547
FUS:362:x:FUS:453	Pellet	xlink	21.6628	1	26.9723	0	-5.30947	24.3176	Supernatant	2.95746e-10	8.37947e-09
FUS:362:x:FUS:456	Pellet	xlink	24.8788	0.0714286	26.5225	0	-1.64372	25.7007	Supernatant	0.00220806	0.00354123
FUS:362:x:FUS:515	Pellet	xlink	27.3765	0	27.1909	0	0.185594	27.2837	Supernatant	0.0752436	0.0949793
FUS:362:x:HspB8:118	Pellet	xlink	26.9633	0.142857	21.952	1	5.01126	24.4576	Supernatant	9.09815e-10	1.54668e-08
FUS:362:x:HspB8:120	Pellet	xlink	26.5917	0	21.5787	1	5.01302	24.0852	Supernatant	3.98859e-10	8.47575e-09
FUS:362:x:HspB8:129	Pellet	xlink	27.9097	0	22.2655	1	5.64417	25.0876	Supernatant	6.88279e-08	5.31852e-07
FUS:370	Pellet	monolink	31.4429	0	30.3361	0	1.10681	30.8895	Supernatant	4.82321e-08	4.09973e-07
FUS:370:x:FUS:432	Pellet	xlink	23.8682	0.357143	27.0386	0	-3.17038	25.4534	Supernatant	0.00729151	0.0108733
FUS:370:x:FUS:453	Pellet	xlink	23.025	0.142857	26.0088	0	-2.98374	24.5169	Supernatant	0.000218671	0.000422433
FUS:370:x:FUS:456	Pellet	xlink	24.7647	0.0714286	26.1801	0	-1.41539	25.4724	Supernatant	0.0644718	0.0830319
FUS:370:x:FUS:515	Pellet	xlink	26.2795	0	25.8401	0	0.43944	26.0598	Supernatant	2.71831e-06	9.24225e-06
FUS:370:x:HspB8:111	Pellet	xlink	25.7953	0	21.7338	1	4.06151	23.7646	Supernatant	8.57807e-07	3.83756e-06
FUS:370:x:HspB8:118	Pellet	xlink	27.9708	0	21.7309	1	6.23994	24.8508	Supernatant	3.71632e-09	3.94859e-08
FUS:432	Pellet	monolink	28.0869	0.285714	28.3813	0	-0.294377	28.2341	Supernatant	0.524339	0.564162
FUS:432:x:FUS:453	Pellet	xlink	26.4412	0.142857	30.4567	0	-4.0155	28.449	Supernatant	9.24919e-11	3.93091e-09
FUS:432:x:FUS:456	Pellet	xlink	27.4091	0.142857	30.479	0	-3.06992	28.944	Supernatant	1.32247e-06	5.10954e-06
FUS:432:x:FUS:515	Pellet	xlink	26.4722	0.142857	28.6445	0	-2.17228	27.5584	Supernatant	2.95616e-05	6.61246e-05
FUS:453	Pellet	monolink	33.285	0	33.1493	0	0.135751	33.2171	Supernatant	0.00529794	0.00804152
FUS:453:x:FUS:456	Pellet	looplink	33.029	0	33.6756	0	-0.646669	33.3523	Supernatant	0.0206078	0.0282526
FUS:453:x:FUS:515	Pellet	xlink	24.9368	0.0714286	28.1783	0	-3.2415	26.5575	Supernatant	0.0117996	0.0167161
FUS:456	Pellet	monolink	34.0824	0	33.8525	0	0.229918	33.9674	Supernatant	6.82849e-06	2.00145e-05
FUS:456:x:FUS:515	Pellet	xlink	27.1065	0	28.9686	0	-1.86214	28.0376	Supernatant	0.0759834	0.0949793
FUS:515:x:HspB8:102	Pellet	xlink	26.229	0.142857	22.5081	0	3.72086	24.3685	Supernatant	5.31113e-07	2.65556e-06
FUS:515:x:HspB8:111	Pellet	xlink	24.2797	0.214286	22.4069	1	1.87278	23.3433	Supernatant	0.0161534	0.0225088
FUS:515:x:HspB8:120	Pellet	xlink	25.2076	0.0714286	22.4944	1	2.71318	23.851	Supernatant	2.51805e-07	1.52882e-06
FUS:515:x:HspB8:129	Pellet	xlink	24.6656	0	18.1209	0.0833333	6.54471	21.3933	Supernatant	3.08246e-06	9.70403e-06
HspB8:102	Pellet	monolink	35.8196	0	35.3268	0	0.492849	35.5732	Supernatant	7.76058e-05	0.00016089
HspB8:102:x:HspB8:111	Pellet	looplink	32.4249	0	31.5011	0	0.923812	31.963	Supernatant	2.80564e-05	6.44539e-05
HspB8:111	Pellet	monolink	33.4371	0	33.5171	0	-0.0799362	33.4771	Supernatant	0.0221015	0.0298194
HspB8:111:x:HspB8:118	Pellet	looplink	31.962	0	31.7341	0	0.227932	31.8481	Supernatant	0.212107	0.243637
HspB8:111:x:HspB8:120	Pellet	looplink	30.1927	0	31.8735	0	-1.68085	31.0331	Supernatant	0.00126835	0.00207326
HspB8:111:x:HspB8:120	Pellet	xlink	21.8377	1	26.3215	0	-4.48377	24.0796	Supernatant	2.29689e-11	1.95235e-09
HspB8:111:x:HspB8:129	Pellet	xlink	34.2257	0	35.0094	0	-0.7837	34.6176	Supernatant	0.000527965	0.000934938
HspB8:111:x:HspB8:133	Pellet	xlink	29.2639	0	31.2855	0	-2.02157	30.2747	Supernatant	2.30253e-09	2.79592e-08
HspB8:118	Pellet	monolink	31.5109	0	33.4273	0	-1.91642	32.4691	Supernatant	2.77425e-05	6.44539e-05
HspB8:118:x:HspB8:120	Pellet	looplink	30.814	0	32.7778	0	-1.9638	31.7959	Supernatant	2.47853e-07	1.52882e-06
HspB8:118:x:HspB8:129	Pellet	xlink	33.5804	0	34.9277	0	-1.34733	34.254	Supernatant	6.44646e-06	1.95696e-05
HspB8:118:x:HspB8:133	Pellet	xlink	28.5566	0.142857	30.3562	0	-1.79958	29.4564	Supernatant	0.00384434	0.00594125
HspB8:120	Pellet	monolink	32.5855	0	33.9273	0	-1.34179	33.2564	Supernatant	0.000184713	0.00036513
HspB8:120:x:HspB8:129	Pellet	xlink	27.4411	0	27.248	0	0.193098	27.3445	Supernatant	0.0869561	0.10712
HspB8:120:x:HspB8:133	Pellet	xlink	30.9647	0	31.1696	0	-0.204839	31.0672	Supernatant	0.937196	0.948353
HspB8:129	Pellet	monolink	32.139	0	32.4627	0	-0.323714	32.3009	Supernatant	0.755538	0.78318
HspB8:129:x:HspB8:129	Pellet	xlink	26.6661	0	26.1422	0	0.523862	26.4041	Supernatant	0.0113812	0.0163966
HspB8:129:x:HspB8:133	Pellet	looplink	30.5702	0	30.0613	0	0.508944	30.3158	Supernatant	0.205939	0.239792
HspB8:129:x:HspB8:142	Pellet	looplink	24.4751	0	22.1762	1	2.29895	23.3257	Supernatant	1.86741e-06	6.61375e-06
HspB8:129:x:HspB8:142	Pellet	xlink	27.582	0	26.1066	0	1.47541	26.8443	Supernatant	1.22804e-06	4.97063e-06
HspB8:133	Pellet	monolink	32.0516	0	32.5979	0	-0.546318	32.3248	Supernatant	0.303122	0.339018
HspB8:133:x:HspB8:142	Pellet	looplink	26.6113	0.142857	27.3664	0	-0.755157	26.9888	Supernatant	0.877285	0.898425
HspB8:142	Pellet	monolink	24.6313	0.142857	23.5308	0	1.10048	24.081	Supernatant	0.00366038	0.00576171

## Sheet: Table S3
Supplemental Table 3. FUSB8 Centrifuge 3 Experiment Crosslink Quantification. Related to Figure 5B, S3G
Quantifiaction for each unique crosslinking site of centrifuge 3 experiment shown in Supplementary Data 3 Table S1
uxID	experiment	link_type	ms1_area_sum	imputed	ms1_area_sum_ref	imputed_ref	log2ratio	reference experiment	pvalue	FDR
FUS:269:x:FUS:317	Pellet	xlink	26.7826	0	24.9474	0.166667	1.83518	Supernatant	0.0100852	0.0128454
FUS:269:x:FUS:321	Pellet	xlink	26.9127	0	25.6068	0	1.30592	Supernatant	6.16e-07	1.3e-06
FUS:269:x:FUS:337	Pellet	xlink	27.2195	0	23.6061	0	3.61342	Supernatant	3.19e-08	1.1e-07
FUS:269:x:FUS:339	Pellet	xlink	27.4278	0	27.0369	0	0.390838	Supernatant	0.0152841	0.0192643
FUS:269:x:FUS:362	Pellet	xlink	24.7167	0	24.7769	0	-0.0601988	Supernatant	0.82574	0.839618
FUS:269:x:FUS:370	Pellet	xlink	28.0761	0	27.214	0	0.862057	Supernatant	1.7e-05	2.81e-05
FUS:269:x:FUS:432	Pellet	xlink	24.9208	0	26.2742	0	-1.35334	Supernatant	0.0611346	0.0739728
FUS:269:x:FUS:453	Pellet	xlink	21.2037	1	20.4768	0.0833333	0.726935	Supernatant	0.251465	0.281734
FUS:269:x:FUS:456	Pellet	xlink	24.9651	0	22.3636	0	2.6015	Supernatant	1.6e-09	1.49e-08
FUS:269:x:FUS:515	Pellet	xlink	28.4713	0	25.575	0	2.89625	Supernatant	5.56e-06	9.89e-06
FUS:269:x:HspB8:129	Pellet	xlink	26.9345	0	20.0579	0	6.87656	Supernatant	1.41e-06	2.73e-06
FUS:311	Pellet	monolink	28.5581	0	25.3224	0	3.23566	Supernatant	2.25e-05	3.68e-05
FUS:311:x:FUS:317	Pellet	looplink	27.468	0	24.9737	0	2.49431	Supernatant	9.44e-09	4.57e-08
FUS:317:x:FUS:321	Pellet	xlink	33.1484	0	32.7599	0	0.38849	Supernatant	0.00371709	0.00478477
FUS:317:x:FUS:337	Pellet	xlink	27.9458	0	23.3819	0	4.56393	Supernatant	1.01e-09	1.11e-08
FUS:317:x:FUS:339	Pellet	xlink	26.3786	0	22.1316	0	4.24698	Supernatant	1.24e-08	5.75e-08
FUS:317:x:FUS:362	Pellet	xlink	26.0876	0	22.0122	0	4.07536	Supernatant	4.6e-08	1.43e-07
FUS:317:x:FUS:370	Pellet	xlink	26.2976	0	20.6017	1	5.69597	Supernatant	4.14e-11	8.34e-10
FUS:317:x:FUS:432	Pellet	xlink	23.2762	0	24.5691	0	-1.29295	Supernatant	0.00118608	0.00159462
FUS:317:x:FUS:515	Pellet	xlink	24.9162	0	19.9984	0.75	4.9178	Supernatant	5.03e-07	1.1e-06
FUS:317:x:HspB8:120	Pellet	xlink	23.4994	0	20.4186	1	3.0808	Supernatant	9.32e-06	1.57e-05
FUS:320:x:FUS:321	Pellet	looplink	30.0543	0	28.8118	0	1.24251	Supernatant	3e-07	7.26e-07
FUS:321	Pellet	monolink	28.182	0	28.803	1	-0.620983	Supernatant	0.000219909	0.00032059
FUS:321:x:FUS:337	Pellet	xlink	29.3692	0	24.6349	0	4.73436	Supernatant	1.11e-12	7.72e-11
FUS:321:x:FUS:339	Pellet	xlink	27.6949	0	20.4373	1	7.2576	Supernatant	9.22e-09	4.57e-08
FUS:321:x:FUS:370	Pellet	xlink	27.4799	0	20.8636	1	6.61629	Supernatant	1.56e-09	1.49e-08
FUS:321:x:FUS:432	Pellet	xlink	26.0995	0	26.2004	0	-0.100857	Supernatant	0.328535	0.360564
FUS:321:x:FUS:456	Pellet	xlink	23.3486	0	18.794	0.166667	4.55457	Supernatant	2.73e-05	4.34e-05
FUS:321:x:FUS:515	Pellet	xlink	27.226	0	20.4816	1	6.74437	Supernatant	9.73e-07	1.96e-06
FUS:321:x:HspB8:120	Pellet	xlink	25.6843	0	21.0605	1	4.62384	Supernatant	3.74e-09	2.66e-08
FUS:321:x:HspB8:129	Pellet	xlink	24.255	0	17.6457	0	6.60926	Supernatant	3.76e-08	1.2e-07
FUS:321:x:HspB8:133	Pellet	xlink	22.9561	0	20.7967	1	2.15941	Supernatant	0.000430655	0.000598957
FUS:337	Pellet	monolink	28.5061	0	25.8225	0	2.68361	Supernatant	2.09e-08	8.41e-08
FUS:337:x:FUS:339	Pellet	looplink	31.7522	0	29.4994	0	2.25277	Supernatant	1.8e-06	3.4e-06
FUS:337:x:FUS:339	Pellet	xlink	27.0311	0	20.3255	1	6.70565	Supernatant	2.2e-09	1.69e-08
FUS:337:x:FUS:362	Pellet	xlink	28.6756	0	24.468	0	4.20765	Supernatant	9.61e-12	2.91e-10
FUS:337:x:FUS:370	Pellet	xlink	30.8587	0	29.7578	0	1.10081	Supernatant	1.35e-07	3.7e-07
FUS:337:x:FUS:432	Pellet	xlink	27.3455	0	24.983	0	2.36249	Supernatant	0.000103859	0.000157086
FUS:337:x:FUS:453	Pellet	xlink	23.922	0	22.107	0	1.81496	Supernatant	8.8e-08	2.53e-07
FUS:337:x:FUS:515	Pellet	xlink	28.2112	0	24.5597	0	3.65144	Supernatant	7.69e-11	1.33e-09
FUS:337:x:HspB8:111	Pellet	xlink	26.0547	0	17.92	0.333333	8.13469	Supernatant	0.000151344	0.000223324
FUS:337:x:HspB8:118	Pellet	xlink	26.3499	0	20.4511	0	5.89877	Supernatant	1.04e-06	2.07e-06
FUS:337:x:HspB8:120	Pellet	xlink	28.4363	0	23.9511	0	4.48524	Supernatant	3.73e-12	1.5e-10
FUS:337:x:HspB8:129	Pellet	xlink	27.7949	0	23.6588	0	4.13607	Supernatant	1.28e-12	7.72e-11
FUS:337:x:HspB8:133	Pellet	xlink	25.5878	0	18.5662	0.5	7.02159	Supernatant	4.99e-10	7.54e-09
FUS:339	Pellet	monolink	28.1412	0	25.8216	0	2.31955	Supernatant	8.94e-07	1.83e-06
FUS:339:x:FUS:353	Pellet	looplink	21.2385	0	20.8281	1	0.41036	Supernatant	0.193154	0.220488
FUS:339:x:FUS:362	Pellet	xlink	28.6015	0	25.8736	0	2.72791	Supernatant	5.43e-09	3.38e-08
FUS:339:x:FUS:370	Pellet	xlink	28.7261	0	29.0353	0	-0.309215	Supernatant	0.345819	0.373608
FUS:339:x:FUS:432	Pellet	xlink	25.6803	0	27.3869	0	-1.70664	Supernatant	0.000293857	0.000418314
FUS:339:x:FUS:456	Pellet	xlink	26.1613	0	23.7999	0	2.3614	Supernatant	4.97e-06	8.97e-06
FUS:339:x:FUS:515	Pellet	xlink	27.5323	0	25.2614	0	2.27091	Supernatant	3.63e-08	1.19e-07
FUS:339:x:HspB8:111	Pellet	xlink	26.4606	0	21.0526	1	5.408	Supernatant	1.98e-08	8.25e-08
FUS:339:x:HspB8:120	Pellet	xlink	26.3999	0	22.0787	0	4.32114	Supernatant	5.87e-09	3.38e-08
FUS:339:x:HspB8:133	Pellet	xlink	22.3105	0.0833333	19.6452	0.833333	2.66527	Supernatant	0.00224997	0.00292738
FUS:353	Pellet	monolink	29.8602	0	27.2934	0	2.56681	Supernatant	7.71e-08	2.28e-07
FUS:353:x:FUS:362	Pellet	looplink	27.8973	0	25.5905	0	2.30676	Supernatant	9.06e-06	1.54e-05
FUS:353:x:FUS:370	Pellet	xlink	27.2542	0	20.8067	0.166667	6.4475	Supernatant	2.96e-08	1.05e-07
FUS:362	Pellet	monolink	30.4586	0	29.1768	0	1.28182	Supernatant	0.0369322	0.0456
FUS:362:x:FUS:362	Pellet	xlink	23.6724	0	20.856	1	2.81644	Supernatant	0.000555936	0.000755823
FUS:362:x:FUS:370	Pellet	looplink	24.396	0	28.5698	0	-4.17377	Supernatant	2.15e-07	5.53e-07
FUS:362:x:FUS:370	Pellet	xlink	27.2626	0	20.3154	1	6.94715	Supernatant	4.33e-09	2.91e-08
FUS:362:x:FUS:432	Pellet	xlink	26.708	0	26.6043	0	0.103707	Supernatant	0.542716	0.57604
FUS:362:x:FUS:515	Pellet	xlink	28.3202	0	26.3455	0	1.97464	Supernatant	2.27e-07	5.73e-07
FUS:362:x:HspB8:120	Pellet	xlink	27.4716	0	21.524	0.0833333	5.94764	Supernatant	3.6e-08	1.19e-07
FUS:362:x:HspB8:129	Pellet	xlink	28.1037	0	22.5092	0	5.59446	Supernatant	7.95e-09	4.18e-08
FUS:370	Pellet	monolink	28.3595	1	27.0268	0.0833333	1.33266	Supernatant	2.91e-05	4.57e-05
FUS:370:x:FUS:370	Pellet	xlink	25.9068	0	20.9775	1	4.92928	Supernatant	1.74e-09	1.51e-08
FUS:370:x:FUS:432	Pellet	xlink	27.4576	0	26.9231	0	0.534499	Supernatant	2.65e-05	4.27e-05
FUS:370:x:FUS:453	Pellet	xlink	22.9024	0.0833333	22.7974	0.25	0.104978	Supernatant	0.623852	0.64518
FUS:370:x:FUS:456	Pellet	xlink	26.6829	0	20.4727	0.5	6.2102	Supernatant	2.35e-08	9.16e-08
FUS:370:x:FUS:515	Pellet	xlink	28.832	0	25.406	0	3.42598	Supernatant	1.27e-11	3.07e-10
FUS:370:x:HspB8:111	Pellet	xlink	29.5167	0	25.3681	0	4.1486	Supernatant	2.77e-07	6.83e-07
FUS:370:x:HspB8:118	Pellet	xlink	29.3463	0	25.4033	0	3.94305	Supernatant	5.08e-07	1.1e-06
FUS:370:x:HspB8:120	Pellet	xlink	27.0558	0	19.1219	0	7.93387	Supernatant	1.74e-08	7.54e-08
FUS:370:x:HspB8:129	Pellet	xlink	27.3559	0	20.1744	0	7.18156	Supernatant	1.62e-08	7.27e-08
FUS:370:x:HspB8:133	Pellet	xlink	24.8414	0	20.4183	1	4.42317	Supernatant	1.42e-06	2.73e-06
FUS:432	Pellet	monolink	30.8259	0	30.5413	0	0.284566	Supernatant	0.564379	0.593825
FUS:432:x:FUS:453	Pellet	xlink	27.4343	0	28.9632	0	-1.52895	Supernatant	0.00163144	0.0021457
FUS:432:x:FUS:456	Pellet	xlink	28.8667	0	29.6314	0	-0.764687	Supernatant	0.0328383	0.0409633
FUS:432:x:FUS:515	Pellet	xlink	28.7758	0	28.5204	0	0.255387	Supernatant	0.0785773	0.0923093
FUS:432:x:HspB8:120	Pellet	xlink	25.6805	0	22.7826	0	2.8979	Supernatant	9.07e-10	1.1e-08
FUS:453	Pellet	monolink	33.7044	0	31.8452	0	1.85919	Supernatant	2.23e-09	1.69e-08
FUS:453:x:FUS:456	Pellet	looplink	34.5207	0	33.8246	0	0.696107	Supernatant	0.000228772	0.00032954
FUS:453:x:FUS:515	Pellet	xlink	26.8864	0	26.5211	0	0.365327	Supernatant	0.0629648	0.0754331
FUS:456	Pellet	monolink	35.0409	0	33.3078	0	1.73312	Supernatant	2.83e-08	1.04e-07
FUS:456:x:FUS:515	Pellet	xlink	28.3778	0	26.5487	0	1.82913	Supernatant	9.02e-08	2.54e-07
FUS:456:x:HspB8:111	Pellet	xlink	22.3236	0	20.4153	1	1.90831	Supernatant	0.0474322	0.0579727
FUS:456:x:HspB8:120	Pellet	xlink	25.3648	0	20.0481	1	5.31671	Supernatant	2.67e-08	1.01e-07
FUS:456:x:HspB8:129	Pellet	xlink	25.1366	0	20.1197	0	5.01686	Supernatant	3.08e-07	7.32e-07
FUS:515:x:FUS:515	Pellet	xlink	28.8812	0	21.1027	1	7.77853	Supernatant	7.51e-10	1.01e-08
FUS:515:x:HspB8:102	Pellet	xlink	28.4916	0	23.4595	0.166667	5.0321	Supernatant	0.000134482	0.000200893
FUS:515:x:HspB8:111	Pellet	xlink	27.5181	0	22.7253	0	4.7928	Supernatant	6.93e-09	3.81e-08
FUS:515:x:HspB8:118	Pellet	xlink	26.69	0	23.4851	0.0833333	3.20494	Supernatant	4.22e-07	9.47e-07
FUS:515:x:HspB8:120	Pellet	xlink	27.2169	0	21.0135	0	6.20343	Supernatant	2.57e-06	4.78e-06
FUS:515:x:HspB8:129	Pellet	xlink	28.8741	0	24.7731	0	4.10093	Supernatant	5.85e-09	3.38e-08
FUS:515:x:HspB8:133	Pellet	xlink	25.499	0	18.9708	0	6.5282	Supernatant	1.42e-07	3.78e-07
HspB8::x:HspB8:120	Pellet	xlink	20.7477	1	24.15	0	-3.40224	Supernatant	1.44e-07	3.78e-07
HspB8:102	Pellet	monolink	34.9854	0	34.982	0	0.00335511	Supernatant	0.921075	0.928751
HspB8:102:x:HspB8:111	Pellet	looplink	32.4562	0	30.6668	0	1.78943	Supernatant	3.39e-07	7.89e-07
HspB8:102:x:HspB8:120	Pellet	xlink	24.005	0	23.5462	0.166667	0.4588	Supernatant	0.611118	0.63746
HspB8:111	Pellet	monolink	33.6738	0	33.9834	0	-0.309518	Supernatant	0.645937	0.662359
HspB8:111:x:HspB8:118	Pellet	looplink	31.9892	0	29.9593	0	2.02993	Supernatant	0.00127638	0.00169717
HspB8:111:x:HspB8:120	Pellet	looplink	25.3014	0	30.109	0	-4.80755	Supernatant	3.69e-06	6.76e-06
HspB8:111:x:HspB8:120	Pellet	xlink	27.8049	0	32.097	0	-4.29207	Supernatant	8.43e-06	1.46e-05
HspB8:111:x:HspB8:129	Pellet	xlink	32.218	0	33.8149	0	-1.5969	Supernatant	7.14e-06	1.25e-05
HspB8:111:x:HspB8:133	Pellet	xlink	26.8835	0	28.4004	0	-1.51693	Supernatant	4.27e-05	6.54e-05
HspB8:118	Pellet	monolink	34.3454	0	34.1672	0	0.178247	Supernatant	0.14772	0.17023
HspB8:118:x:HspB8:120	Pellet	looplink	31.5832	0	32.6832	0	-1.10001	Supernatant	3.09e-05	4.79e-05
HspB8:118:x:HspB8:129	Pellet	xlink	33.579	0	34.5529	0	-0.973906	Supernatant	0.000355055	0.000499554
HspB8:120	Pellet	monolink	31.4812	0	31.7967	0	-0.315454	Supernatant	0.000482774	0.000663815
HspB8:120:x:HspB8:120	Pellet	xlink	20.888	0.833333	20.5151	1	0.372841	Supernatant	0.330765	0.360564
HspB8:120:x:HspB8:129	Pellet	looplink	28.9322	0	29.0076	0	-0.0753672	Supernatant	0.0945068	0.109955
HspB8:120:x:HspB8:129	Pellet	xlink	29.0801	0	28.9328	0	0.14726	Supernatant	0.30859	0.342563
HspB8:120:x:HspB8:133	Pellet	xlink	26.7085	0	25.48	0	1.22852	Supernatant	4.97e-08	1.5e-07
HspB8:129	Pellet	monolink	31.0612	0	30.9552	0	0.106065	Supernatant	0.532362	0.570051
HspB8:129:x:HspB8:129	Pellet	xlink	27.1014	0	27.522	0	-0.420619	Supernatant	0.0684227	0.0811682
HspB8:129:x:HspB8:133	Pellet	looplink	31.178	0	31.0419	0	0.13615	Supernatant	0.229288	0.259288
HspB8:129:x:HspB8:142	Pellet	xlink	24.1017	0	22.1252	0	1.97653	Supernatant	3.84e-07	8.77e-07
HspB8:133	Pellet	monolink	31.6254	0	31.6224	0	0.00300901	Supernatant	0.935694	0.935694
HspB8:133:x:HspB8:142	Pellet	looplink	28.3876	0	27.1863	0	1.20135	Supernatant	6.21e-07	1.3e-06

## Sheet: Table S4
Supplemental Table 4. FUSB8 Salt Experiment Crosslink Quantification. Related to Figure 5B, S3G
Quantifiaction for each unique crosslinking site shown in Supplementary Data 3 Table S3
uID	experiment	link_type	ms1_area_sum	imputed	ms1_area_sum_ref	imputed_ref	log2ratio	referenceexperiment	pvalue	FDR
FUS:269:x:FUS:339	75 mM KCl	xlink	25.5349	0	26.2949	0	-0.760028	500 mM KCl	0.00012861	0.000402606
FUS:269:x:FUS:362	75 mM KCl	xlink	23.1751	0	24.6877	0	-1.5126	500 mM KCl	0.00368445	0.00716975
FUS:269:x:FUS:370	75 mM KCl	xlink	21.2756	1	24.2656	0	-2.98997	500 mM KCl	2.38544e-07	2.86253e-06
FUS:269:x:FUS:515	75 mM KCl	xlink	21.2285	1	23.6569	0	-2.42835	500 mM KCl	2.11476e-05	0.000101509
FUS:311	75 mM KCl	monolink	28.8855	0	27.5478	0	1.33776	500 mM KCl	0.00311123	0.00640025
FUS:311:x:FUS:317	75 mM KCl	looplink	24.1648	0	26.451	0	-2.28624	500 mM KCl	0.0223548	0.0357677
FUS:317:x:FUS:321	75 mM KCl	xlink	31.3724	0	31.6417	0	-0.269232	500 mM KCl	0.0200019	0.0327303
FUS:320:x:FUS:321	75 mM KCl	looplink	24.9299	0	26.0876	0	-1.15766	500 mM KCl	0.119675	0.159281
FUS:321	75 mM KCl	monolink	27.8722	0	27.5828	0	0.289422	500 mM KCl	0.0737558	0.104126
FUS:321:x:FUS:339	75 mM KCl	xlink	23.9348	0	25.2572	0	-1.32234	500 mM KCl	0.0813887	0.112692
FUS:337	75 mM KCl	monolink	29.586	0	28.8378	0	0.748163	500 mM KCl	0.0344859	0.0506732
FUS:337:x:FUS:339	75 mM KCl	looplink	26.6993	0	29.0414	0	-2.34211	500 mM KCl	0.16215	0.197878
FUS:337:x:FUS:339	75 mM KCl	xlink	23.7201	0	21.7917	0	1.92841	500 mM KCl	8.1783e-06	5.35307e-05
FUS:337:x:FUS:370	75 mM KCl	xlink	26.5122	0	25.7947	0	0.71747	500 mM KCl	0.000735513	0.00196137
FUS:339	75 mM KCl	monolink	30.3563	0	28.0071	0	2.34924	500 mM KCl	0.000768474	0.00197608
FUS:339:x:FUS:362	75 mM KCl	xlink	23.3706	0	24.6728	0.166667	-1.30219	500 mM KCl	0.00925879	0.0162593
FUS:339:x:FUS:370	75 mM KCl	xlink	28.3081	0	28.0923	0	0.215881	500 mM KCl	0.291618	0.333278
FUS:339:x:FUS:456	75 mM KCl	xlink	21.8416	0.333333	24.6213	0	-2.77964	500 mM KCl	0.00244017	0.00516743
FUS:339:x:FUS:515	75 mM KCl	xlink	23.3072	0	25.658	0	-2.35084	500 mM KCl	0.00405668	0.00768633
FUS:339:x:HspB8:120	75 mM KCl	xlink	24.9728	0	21.5757	1	3.39718	500 mM KCl	2.10607e-06	1.89547e-05
FUS:339:x:HspB8:133	75 mM KCl	xlink	23.4463	0	21.313	1	2.13327	500 mM KCl	0.00067077	0.00185752
FUS:353	75 mM KCl	monolink	28.5066	0	27.7483	0	0.758294	500 mM KCl	1.3861e-05	7.67688e-05
FUS:362	75 mM KCl	monolink	29.2537	0	29.3405	0	-0.086813	500 mM KCl	0.433353	0.452194
FUS:362:x:FUS:370	75 mM KCl	looplink	28.7845	0	26.8251	0	1.95946	500 mM KCl	0.150041	0.186258
FUS:362:x:FUS:456	75 mM KCl	xlink	21.1238	1	21.5322	0.333333	-0.408386	500 mM KCl	0.241159	0.280055
FUS:362:x:FUS:515	75 mM KCl	xlink	22.9924	0	25.9228	0	-2.93041	500 mM KCl	0.00620025	0.0114466
FUS:362:x:HspB8:	75 mM KCl	xlink	20.7021	0.5	21.5034	0.416667	-0.801236	500 mM KCl	0.00842774	0.0151699
FUS:362:x:HspB8:120	75 mM KCl	xlink	21.4509	1	20.3569	0.5	1.09403	500 mM KCl	0.121673	0.159281
FUS:362:x:HspB8:129	75 mM KCl	xlink	21.0878	1	20.3811	0.5	0.706677	500 mM KCl	0.301338	0.339005
FUS:370	75 mM KCl	monolink	30.6114	0	30.7123	0	-0.100865	500 mM KCl	0.315102	0.343748
FUS:370:x:HspB8:120	75 mM KCl	xlink	24.1496	0	19.6929	0	4.45665	500 mM KCl	0.00011778	0.000402606
FUS:432	75 mM KCl	monolink	22.4695	2	28.8628	0	-6.39329	500 mM KCl	4.43478e-09	7.98261e-08
FUS:432:x:FUS:515	75 mM KCl	xlink	20.9503	1	23.4208	0	-2.47047	500 mM KCl	0.0285737	0.0437725
FUS:453	75 mM KCl	monolink	29.9792	0	30.5215	0	-0.542238	500 mM KCl	0.134014	0.16928
FUS:453:x:FUS:456	75 mM KCl	looplink	29.5551	0	31.525	0	-1.96984	500 mM KCl	6.22042e-05	0.000248817
FUS:456	75 mM KCl	monolink	31.5078	0	31.43	0	0.0777764	500 mM KCl	0.824448	0.83606
FUS:456:x:FUS:515	75 mM KCl	xlink	21.0375	0.583333	26.3285	0	-5.29098	500 mM KCl	3.93782e-05	0.000166778
FUS:515:x:FUS:515	75 mM KCl	xlink	19.5038	0.333333	23.3771	0	-3.87329	500 mM KCl	0.000521703	0.0015025
FUS:515:x:HspB8:	75 mM KCl	xlink	22.0756	0.333333	26.2959	0	-4.22035	500 mM KCl	0.00147896	0.00332765
FUS:515:x:HspB8:120	75 mM KCl	xlink	21.0202	1	20.8594	0	0.160814	500 mM KCl	0.858966	0.858966
FUS:515:x:HspB8:129	75 mM KCl	xlink	20.9008	0.0833333	23.1271	0	-2.22635	500 mM KCl	0.00356297	0.00712595
HspB8::x:HspB8:	75 mM KCl	xlink	21.7611	1	29.9065	0	-8.14536	500 mM KCl	5.12036e-10	2.73514e-08
HspB8::x:HspB8:120	75 mM KCl	xlink	25.3052	0	27.6635	0	-2.35831	500 mM KCl	0.0107722	0.0180372
HspB8::x:HspB8:129	75 mM KCl	xlink	22.7801	0.333333	28.2303	0	-5.45024	500 mM KCl	2.9995e-05	0.000134977
HspB8:102	75 mM KCl	monolink	32.3654	0	33.4027	0	-1.03731	500 mM KCl	0.00215744	0.00470715
HspB8:102:x:HspB8:111	75 mM KCl	looplink	30.2136	0	30.9322	0	-0.718685	500 mM KCl	0.0104678	0.0179448
HspB8:111	75 mM KCl	monolink	32.4246	0	32.6473	0	-0.222684	500 mM KCl	0.225114	0.265708
HspB8:111:x:HspB8:118	75 mM KCl	looplink	30.3487	0	30.0946	0	0.25407	500 mM KCl	0.132264	0.16928
HspB8:111:x:HspB8:120	75 mM KCl	looplink	30.3152	0	30.1368	0	0.178476	500 mM KCl	0.313652	0.343748
HspB8:111:x:HspB8:120	75 mM KCl	xlink	27.4735	0	26.4562	0	1.01733	500 mM KCl	0.0984113	0.133691
HspB8:111:x:HspB8:129	75 mM KCl	xlink	31.3444	0	30.8514	0	0.49291	500 mM KCl	0.210766	0.252919
HspB8:111:x:HspB8:133	75 mM KCl	xlink	24.3273	0	25.2041	0	-0.876837	500 mM KCl	0.392723	0.415824
HspB8:118	75 mM KCl	monolink	32.1972	0	31.8084	0	0.388867	500 mM KCl	0.0245824	0.0384768
HspB8:118:x:HspB8:120	75 mM KCl	looplink	30.2448	0	29.5756	0	0.66915	500 mM KCl	0.00142387	0.00330705
HspB8:118:x:HspB8:129	75 mM KCl	xlink	31.5063	0	31.1135	0	0.392812	500 mM KCl	0.330386	0.355041
HspB8:120	75 mM KCl	monolink	31.2524	0	31.3958	0	-0.143401	500 mM KCl	0.61083	0.628283
HspB8:120:x:HspB8:120	75 mM KCl	xlink	26.9189	0	25.184	0	1.73492	500 mM KCl	2.52329e-06	2.01863e-05
HspB8:120:x:HspB8:129	75 mM KCl	looplink	24.7872	0	23.4352	0	1.35192	500 mM KCl	0.00126039	0.00312923
HspB8:120:x:HspB8:129	75 mM KCl	xlink	29.0445	0	27.6941	0	1.35043	500 mM KCl	1.18894e-05	7.13364e-05
HspB8:120:x:HspB8:133	75 mM KCl	xlink	30.8855	0	29.6237	0	1.26182	500 mM KCl	1.08598e-06	1.11701e-05
HspB8:129	75 mM KCl	monolink	31.5935	0	31.021	0	0.572484	500 mM KCl	0.0323506	0.0485259
HspB8:129:x:HspB8:129	75 mM KCl	xlink	28.2879	0	26.0178	0	2.27014	500 mM KCl	1.52231e-05	7.82904e-05
HspB8:129:x:HspB8:133	75 mM KCl	looplink	29.7434	0	29.1836	0	0.559824	500 mM KCl	0.00132839	0.00318813
HspB8:129:x:HspB8:133	75 mM KCl	xlink	25.0613	0	19.6565	0.333333	5.40478	500 mM KCl	5.99677e-06	4.31768e-05
HspB8:129:x:HspB8:142	75 mM KCl	looplink	29.6512	0	23.3001	0	6.35109	500 mM KCl	3.05334e-09	7.32801e-08
HspB8:129:x:HspB8:142	75 mM KCl	xlink	26.8392	0	25.0626	0	1.77656	500 mM KCl	1.12489e-07	1.61984e-06
HspB8:133	75 mM KCl	monolink	32.2649	0	31.1419	0	1.12299	500 mM KCl	0.000126763	0.000402606
HspB8:133:x:HspB8:142	75 mM KCl	looplink	25.5584	0	24.857	0	0.701402	500 mM KCl	0.0690956	0.0994976
HspB8:142	75 mM KCl	monolink	27.6311	0	24.8991	0	2.73201	500 mM KCl	7.59762e-10	2.73514e-08
HspB8:142:x:HspB8:146	75 mM KCl	looplink	26.9814	0	21.6207	1	5.36073	500 mM KCl	8.61674e-05	0.000326529
HspB8:142:x:HspB8:147	75 mM KCl	looplink	26.8879	0	21.3816	1	5.50629	500 mM KCl	9.91821e-05	0.000357055
HspB8:146:x:HspB8:147	75 mM KCl	looplink	26.8878	0	21.3851	1	5.50268	500 mM KCl	0.000168161	0.000504483

## Sheet: Table S5
Supplemental Table 5. FUS-K9B8 Salt Experiment Crosslink Quantification. Related to Figure 5B, S3G
Quantifiaction for each unique crosslinking site shown in Supplementary Data 3 Table S5
uxID	experiment	link_type	ms1_area_sum	imputed	ms1_area_sum_ref	imputed_ref	log2ratio	reference experiment	pvalue	FDR
FUS-K9::x:FUS-K9:106	75 mM KCl	xlink	26.1934	0	25.4319	0	0.761534	500 mM KCl	0.0725895	0.0979959
FUS-K9::x:FUS-K9:113	75 mM KCl	xlink	20.4736	1	24.2921	0	-3.81856	500 mM KCl	0.000124298	0.000344256
FUS-K9::x:FUS-K9:140	75 mM KCl	xlink	25.4507	0	24.1754	0	1.27529	500 mM KCl	0.0201647	0.0311112
FUS-K9::x:FUS-K9:150	75 mM KCl	xlink	24.7518	0	21.7937	0	2.95807	500 mM KCl	0.00407727	0.00733908
FUS-K9::x:FUS-K9:16	75 mM KCl	xlink	30.1196	0	30.7869	0	-0.667239	500 mM KCl	0.00372088	0.00677284
FUS-K9::x:FUS-K9:160	75 mM KCl	xlink	26.6418	0	24.96	0	1.68186	500 mM KCl	0.0017624	0.00346072
FUS-K9::x:FUS-K9:168	75 mM KCl	xlink	26.076	0	24.6366	0	1.4394	500 mM KCl	0.000813669	0.00180568
FUS-K9::x:FUS-K9:188	75 mM KCl	xlink	25.1386	0	20.6619	1	4.47673	500 mM KCl	4.34233e-10	2.34486e-08
FUS-K9::x:FUS-K9:198	75 mM KCl	xlink	25.1387	0	24.112	0	1.02678	500 mM KCl	0.0105489	0.0176177
FUS-K9::x:FUS-K9:225	75 mM KCl	xlink	25.9946	0	24.9115	0	1.08308	500 mM KCl	0.00151046	0.00303968
FUS-K9::x:FUS-K9:23	75 mM KCl	xlink	28.7526	0	20.4934	1	8.25917	500 mM KCl	7.66323e-09	1.30678e-07
FUS-K9::x:FUS-K9:235	75 mM KCl	xlink	25.6663	0	23.7789	0	1.88739	500 mM KCl	0.000507897	0.00117542
FUS-K9::x:FUS-K9:32	75 mM KCl	xlink	28.0648	0	28.0765	0	-0.0117076	500 mM KCl	0.885181	0.899056
FUS-K9::x:FUS-K9:349	75 mM KCl	xlink	27.1102	0	24.1299	0	2.98028	500 mM KCl	0.000138391	0.000373657
FUS-K9::x:FUS-K9:367	75 mM KCl	xlink	27.9094	0	26.5796	0	1.32977	500 mM KCl	2.04785e-06	1.13925e-05
FUS-K9::x:FUS-K9:390	75 mM KCl	xlink	28.1436	0	26.8395	0	1.30406	500 mM KCl	6.71894e-07	5.0997e-06
FUS-K9::x:FUS-K9:398	75 mM KCl	xlink	27.2231	0	24.9783	0	2.2448	500 mM KCl	4.40062e-06	1.95748e-05
FUS-K9::x:FUS-K9:40	75 mM KCl	xlink	26.8163	0	27.4187	0	-0.602445	500 mM KCl	0.224127	0.265997
FUS-K9::x:FUS-K9:481	75 mM KCl	xlink	25.9988	0	22.1449	0.0833333	3.8539	500 mM KCl	0.00474418	0.00835389
FUS-K9::x:FUS-K9:50	75 mM KCl	xlink	24.598	0	25.4946	0	-0.896587	500 mM KCl	0.0165416	0.0261438
FUS-K9::x:FUS-K9:543	75 mM KCl	xlink	27.5088	0	26.8806	0	0.628222	500 mM KCl	0.000847156	0.0018672
FUS-K9::x:FUS-K9:60	75 mM KCl	xlink	26.6535	0	26.1511	0	0.502423	500 mM KCl	0.00454007	0.00808233
FUS-K9::x:FUS-K9:78	75 mM KCl	xlink	26.8773	0	26.3943	0	0.483022	500 mM KCl	0.0174258	0.0272751
FUS-K9::x:FUS-K9:88	75 mM KCl	xlink	26.0531	0	25.6245	0	0.42858	500 mM KCl	0.0544043	0.0766391
FUS-K9::x:FUS-K9:98	75 mM KCl	xlink	26.9895	0	25.966	0	1.02355	500 mM KCl	0.00317735	0.00591644
FUS-K9::x:HspB8:	75 mM KCl	xlink	31.998	0	29.5538	0	2.44415	500 mM KCl	8.10996e-07	5.5907e-06
FUS-K9::x:HspB8:102	75 mM KCl	xlink	30.1251	0	25.8986	0	4.22649	500 mM KCl	3.0569e-05	0.000105365
FUS-K9::x:HspB8:111	75 mM KCl	xlink	29.4388	0	25.4504	0	3.98841	500 mM KCl	6.47599e-05	0.000206858
FUS-K9::x:HspB8:118	75 mM KCl	xlink	29.4386	0	24.2541	0	5.18457	500 mM KCl	6.91504e-05	0.000216023
FUS-K9::x:HspB8:120	75 mM KCl	xlink	28.0481	0	25.1084	0	2.93971	500 mM KCl	0.00101505	0.00216367
FUS-K9::x:HspB8:129	75 mM KCl	xlink	29.7487	0	26.8032	0	2.94546	500 mM KCl	1.59301e-08	2.45778e-07
FUS-K9::x:HspB8:133	75 mM KCl	xlink	28.529	0	22.9269	0.0833333	5.60215	500 mM KCl	1.53354e-05	5.71111e-05
FUS-K9:106	75 mM KCl	monolink	23.375	0	22.881	0	0.493998	500 mM KCl	0.240421	0.281215
FUS-K9:106:x:FUS-K9:113	75 mM KCl	looplink	20.7128	1	27.2094	0	-6.49657	500 mM KCl	3.0939e-09	6.68283e-08
FUS-K9:106:x:FUS-K9:120	75 mM KCl	xlink	28.9386	0	28.6788	0	0.259879	500 mM KCl	0.0636789	0.0874236
FUS-K9:106:x:FUS-K9:140	75 mM KCl	xlink	24.964	0	24.5144	0	0.449593	500 mM KCl	0.0431621	0.0624308
FUS-K9:106:x:FUS-K9:16	75 mM KCl	xlink	20.3996	1	20.5984	0.25	-0.198783	500 mM KCl	0.94266	0.948515
FUS-K9:106:x:FUS-K9:168	75 mM KCl	xlink	22.6794	0	21.5991	0	1.08023	500 mM KCl	0.0803626	0.106711
FUS-K9:106:x:FUS-K9:32	75 mM KCl	xlink	24.3515	0	21.4617	0	2.88987	500 mM KCl	0.00224259	0.0042994
FUS-K9:106:x:FUS-K9:367	75 mM KCl	xlink	23.224	0	22.0013	0	1.22272	500 mM KCl	0.000585128	0.00133508
FUS-K9:106:x:FUS-K9:543	75 mM KCl	xlink	22.3656	0.166667	20.5293	0.0833333	1.8363	500 mM KCl	0.0214724	0.0328162
FUS-K9:106:x:FUS-K9:60	75 mM KCl	xlink	22.0302	0.0833333	20.9079	1	1.1223	500 mM KCl	0.0293869	0.0434765
FUS-K9:106:x:FUS-K9:69	75 mM KCl	xlink	24.0972	0	23.2522	0.0833333	0.845045	500 mM KCl	0.0895882	0.117994
FUS-K9:106:x:FUS-K9:78	75 mM KCl	xlink	26.1347	0	25.3731	0	0.761571	500 mM KCl	0.00204935	0.00395233
FUS-K9:106:x:FUS-K9:88	75 mM KCl	xlink	27.8481	0	27.4959	0	0.352213	500 mM KCl	0.076627	0.102591
FUS-K9:106:x:FUS-K9:98	75 mM KCl	looplink	27.215	0	27.7989	0	-0.583974	500 mM KCl	0.0222517	0.0338476
FUS-K9:106:x:HspB8:	75 mM KCl	xlink	27.777	0	20.1616	1	7.61536	500 mM KCl	2.08283e-09	6.06525e-08
FUS-K9:106:x:HspB8:120	75 mM KCl	xlink	20.6537	0.25	20.821	1	-0.167265	500 mM KCl	0.286451	0.327951
FUS-K9:106:x:HspB8:129	75 mM KCl	xlink	25.4902	0	21.8857	0	3.60457	500 mM KCl	5.65483e-06	2.41074e-05
FUS-K9:113:x:FUS-K9:120	75 mM KCl	looplink	29.1566	0	29.3834	0	-0.226749	500 mM KCl	0.129456	0.165133
FUS-K9:113:x:FUS-K9:130	75 mM KCl	xlink	27.2903	0	27.3765	0	-0.0862656	500 mM KCl	0.498782	0.545964
FUS-K9:113:x:FUS-K9:140	75 mM KCl	xlink	23.376	0	23.1836	0	0.192393	500 mM KCl	0.782667	0.815383
FUS-K9:113:x:FUS-K9:150	75 mM KCl	xlink	24.0493	0	23.4315	0	0.6178	500 mM KCl	0.0143596	0.0229188
FUS-K9:113:x:FUS-K9:168	75 mM KCl	xlink	21.6334	0.0833333	20.6636	0.0833333	0.969881	500 mM KCl	0.246136	0.286864
FUS-K9:113:x:FUS-K9:88	75 mM KCl	xlink	26.0857	0	25.0656	0	1.02017	500 mM KCl	0.00357484	0.00654377
FUS-K9:113:x:FUS-K9:98	75 mM KCl	xlink	27.3749	0	27.2451	0	0.129759	500 mM KCl	0.178921	0.221261
FUS-K9:113:x:HspB8:	75 mM KCl	xlink	27.9075	0	20.922	1	6.98551	500 mM KCl	1.87e-09	6.05879e-08
FUS-K9:113:x:HspB8:111	75 mM KCl	xlink	24.0405	0	20.2608	1	3.77975	500 mM KCl	7.21411e-08	7.30429e-07
FUS-K9:113:x:HspB8:120	75 mM KCl	xlink	24.0248	0	19.7863	0.416667	4.23851	500 mM KCl	1.06934e-06	7.07077e-06
FUS-K9:113:x:HspB8:129	75 mM KCl	xlink	25.0699	0	20.3048	0.166667	4.76511	500 mM KCl	1.86779e-07	1.63558e-06
FUS-K9:120	75 mM KCl	monolink	28.9382	0	28.3436	0	0.594576	500 mM KCl	0.00159499	0.00317041
FUS-K9:120:x:FUS-K9:130	75 mM KCl	looplink	25.9971	0	20.5367	1	5.4604	500 mM KCl	1.95841e-06	1.1132e-05
FUS-K9:120:x:FUS-K9:140	75 mM KCl	xlink	27.3408	0	27.3398	0	0.00105175	500 mM KCl	0.993945	0.993945
FUS-K9:120:x:FUS-K9:150	75 mM KCl	xlink	25.6428	0	24.0112	0	1.63167	500 mM KCl	0.000935216	0.00202007
FUS-K9:120:x:FUS-K9:168	75 mM KCl	xlink	24.7201	0	23.5803	0	1.13979	500 mM KCl	0.000148734	0.000391787
FUS-K9:120:x:FUS-K9:198	75 mM KCl	xlink	24.5515	0	23.591	0	0.960509	500 mM KCl	0.00242803	0.00460047
FUS-K9:120:x:FUS-K9:23	75 mM KCl	xlink	22.5139	0	20.4604	1	2.0535	500 mM KCl	0.000876031	0.00190493
FUS-K9:120:x:FUS-K9:367	75 mM KCl	xlink	20.4774	1	22.2218	0.25	-1.74434	500 mM KCl	0.0121572	0.0199946
FUS-K9:120:x:FUS-K9:543	75 mM KCl	xlink	21.6756	0	20.6439	1	1.03176	500 mM KCl	0.0123031	0.0201323
FUS-K9:120:x:HspB8:129	75 mM KCl	xlink	26.1517	0	21.3201	0.0833333	4.83159	500 mM KCl	1.13688e-06	7.367e-06
FUS-K9:130	75 mM KCl	monolink	28.132	0	27.8172	0	0.314793	500 mM KCl	0.110719	0.14292
FUS-K9:130:x:FUS-K9:140	75 mM KCl	looplink	26.0309	0	27.4652	0	-1.43429	500 mM KCl	6.93406e-05	0.000216023
FUS-K9:130:x:FUS-K9:150	75 mM KCl	xlink	26.0336	0	26.4099	0	-0.376299	500 mM KCl	0.168877	0.20964
FUS-K9:130:x:FUS-K9:160	75 mM KCl	xlink	22.4491	0	22.4981	0	-0.0490503	500 mM KCl	0.855844	0.880045
FUS-K9:130:x:FUS-K9:168	75 mM KCl	xlink	20.5335	1	22.3645	0	-1.83108	500 mM KCl	0.0075705	0.0129097
FUS-K9:140	75 mM KCl	monolink	27.2158	1	27.5809	0	-0.365081	500 mM KCl	0.0990708	0.129431
FUS-K9:140:x:FUS-K9:150	75 mM KCl	looplink	27.8523	0	27.8101	0	0.0421667	500 mM KCl	0.861032	0.880045
FUS-K9:140:x:FUS-K9:160	75 mM KCl	xlink	26.5854	0	27.0646	0	-0.479164	500 mM KCl	0.0461466	0.0661571
FUS-K9:140:x:FUS-K9:168	75 mM KCl	xlink	24.2703	0	24.7121	0	-0.441717	500 mM KCl	0.431918	0.479252
FUS-K9:140:x:FUS-K9:198	75 mM KCl	xlink	22.5374	0.166667	21.2308	0	1.30657	500 mM KCl	0.409492	0.457502
FUS-K9:140:x:FUS-K9:367	75 mM KCl	xlink	24.0251	0	22.9322	0	1.09282	500 mM KCl	6.51219e-05	0.000206858
FUS-K9:140:x:FUS-K9:98	75 mM KCl	xlink	22.0269	0	22.4833	0.0833333	-0.456436	500 mM KCl	0.366072	0.414711
FUS-K9:140:x:HspB8:	75 mM KCl	xlink	27.3201	0	20.9861	0.416667	6.33405	500 mM KCl	4.29834e-07	3.48166e-06
FUS-K9:140:x:HspB8:111	75 mM KCl	xlink	23.6827	0	20.0758	1	3.60687	500 mM KCl	1.51659e-06	9.28099e-06
FUS-K9:140:x:HspB8:120	75 mM KCl	xlink	25.0731	0	18.4555	0.25	6.61758	500 mM KCl	1.68866e-07	1.51979e-06
FUS-K9:140:x:HspB8:129	75 mM KCl	xlink	24.0397	0	20.6735	1	3.36617	500 mM KCl	1.64501e-07	1.51979e-06
FUS-K9:150	75 mM KCl	monolink	27.8918	1	28.5984	0	-0.706545	500 mM KCl	0.000738135	0.0016608
FUS-K9:150:x:FUS-K9:160	75 mM KCl	looplink	27.0654	0	26.9013	0	0.16411	500 mM KCl	0.732503	0.770555
FUS-K9:150:x:FUS-K9:168	75 mM KCl	xlink	27.572	0	28.0157	0	-0.443724	500 mM KCl	0.0642296	0.0878076
FUS-K9:150:x:FUS-K9:88	75 mM KCl	xlink	22.3762	0	20.7707	0.166667	1.60555	500 mM KCl	0.000136376	0.000373657
FUS-K9:150:x:FUS-K9:98	75 mM KCl	xlink	21.0062	1	20.466	0.416667	0.540137	500 mM KCl	0.248627	0.288729
FUS-K9:150:x:HspB8:	75 mM KCl	xlink	27.8706	0	20.4322	0.5	7.43842	500 mM KCl	7.93751e-11	9.26652e-09
FUS-K9:150:x:HspB8:129	75 mM KCl	xlink	25.2426	0	20.6636	1	4.57906	500 mM KCl	1.33786e-09	5.41831e-08
FUS-K9:16	75 mM KCl	monolink	26.5296	0	25.0799	1	1.44968	500 mM KCl	0.000500234	0.00116601
FUS-K9:16:x:FUS-K9:23	75 mM KCl	looplink	28.3595	0	28.5294	0	-0.169886	500 mM KCl	0.266936	0.307784
FUS-K9:16:x:FUS-K9:32	75 mM KCl	xlink	27.9381	0	27.4364	0	0.501692	500 mM KCl	0.000211081	0.0005343
FUS-K9:16:x:FUS-K9:40	75 mM KCl	xlink	24.9057	0	24.9663	0	-0.0606541	500 mM KCl	0.792831	0.823324
FUS-K9:16:x:FUS-K9:50	75 mM KCl	xlink	21.2626	0.166667	20.8082	0.333333	0.454453	500 mM KCl	0.236936	0.278142
FUS-K9:16:x:FUS-K9:69	75 mM KCl	xlink	21.6469	0	20.5077	0.25	1.13927	500 mM KCl	0.225739	0.266932
FUS-K9:16:x:FUS-K9:88	75 mM KCl	xlink	21.5591	0.166667	20.1712	0.583333	1.38792	500 mM KCl	0.0206436	0.0316992
FUS-K9:16:x:HspB8:	75 mM KCl	xlink	28.0859	0	20.6924	1	7.39358	500 mM KCl	9.57109e-11	9.26652e-09
FUS-K9:16:x:HspB8:129	75 mM KCl	xlink	24.6674	0	21.1892	0.0833333	3.47818	500 mM KCl	7.57191e-06	3.10544e-05
FUS-K9:160	75 mM KCl	monolink	28.4972	0	28.0137	0	0.483498	500 mM KCl	0.0149332	0.0237174
FUS-K9:160:x:FUS-K9:168	75 mM KCl	looplink	27.6115	0	28.9762	0	-1.36466	500 mM KCl	4.95923e-08	5.35597e-07
FUS-K9:160:x:FUS-K9:178	75 mM KCl	xlink	24.2553	0.0833333	24.8369	0	-0.581659	500 mM KCl	0.214018	0.257776
FUS-K9:160:x:FUS-K9:188	75 mM KCl	xlink	23.2268	0	22.9613	0.0833333	0.265424	500 mM KCl	0.437489	0.483776
FUS-K9:160:x:FUS-K9:198	75 mM KCl	xlink	24.8938	0	24.4521	0	0.44169	500 mM KCl	0.144695	0.181899
FUS-K9:160:x:FUS-K9:367	75 mM KCl	xlink	24.3854	0	23.292	0	1.09339	500 mM KCl	0.00116643	0.00242258
FUS-K9:160:x:HspB8:	75 mM KCl	xlink	28.0929	0	20.8719	0.416667	7.22099	500 mM KCl	6.84614e-09	1.2323e-07
FUS-K9:160:x:HspB8:120	75 mM KCl	xlink	23.4329	0	20.6322	1	2.80065	500 mM KCl	0.000264816	0.000650002
FUS-K9:160:x:HspB8:129	75 mM KCl	xlink	23.1775	0	20.3858	0.75	2.79179	500 mM KCl	1.63052e-06	9.60525e-06
FUS-K9:168	75 mM KCl	monolink	28.7317	0	28.5309	0	0.200727	500 mM KCl	0.319818	0.363582
FUS-K9:168:x:FUS-K9:188	75 mM KCl	xlink	26.202	0	27.0828	0	-0.880805	500 mM KCl	0.00699131	0.0120489
FUS-K9:168:x:FUS-K9:198	75 mM KCl	xlink	24.8903	0	24.7129	0	0.177439	500 mM KCl	0.87568	0.892202
FUS-K9:168:x:FUS-K9:235	75 mM KCl	xlink	20.304	1	20.7783	0.25	-0.474348	500 mM KCl	0.40433	0.453297
FUS-K9:168:x:FUS-K9:367	75 mM KCl	xlink	24.6128	0	23.5296	0	1.08322	500 mM KCl	0.00295298	0.00553044
FUS-K9:168:x:HspB8:	75 mM KCl	xlink	27.8099	0	21.0334	1	6.77647	500 mM KCl	2.95293e-10	1.9135e-08
FUS-K9:168:x:HspB8:129	75 mM KCl	xlink	24.6046	0	21.2323	0.0833333	3.37221	500 mM KCl	0.000410521	0.000972765
FUS-K9:178	75 mM KCl	monolink	26.3517	0	26.3576	0	-0.00584794	500 mM KCl	0.121078	0.155056
FUS-K9:178:x:FUS-K9:188	75 mM KCl	looplink	22.5888	0	26.2489	0	-3.6601	500 mM KCl	5.54232e-06	2.39428e-05
FUS-K9:178:x:FUS-K9:198	75 mM KCl	xlink	24.6037	0	25.7566	0	-1.15293	500 mM KCl	0.154936	0.193819
FUS-K9:188	75 mM KCl	monolink	28.0475	0	27.7939	0	0.253653	500 mM KCl	0.13486	0.171352
FUS-K9:188:x:FUS-K9:198	75 mM KCl	looplink	26.9722	0	27.3987	0	-0.426546	500 mM KCl	0.00110869	0.00231752
FUS-K9:188:x:FUS-K9:206	75 mM KCl	xlink	27.5491	0	27.8815	0	-0.332327	500 mM KCl	0.180444	0.222296
FUS-K9:188:x:FUS-K9:216	75 mM KCl	xlink	25.3109	0	25.4673	0	-0.156369	500 mM KCl	0.559427	0.606202
FUS-K9:188:x:FUS-K9:225	75 mM KCl	xlink	24.366	0	25.5973	0	-1.23127	500 mM KCl	0.0900142	0.118075
FUS-K9:188:x:FUS-K9:235	75 mM KCl	xlink	24.3138	0	24.8833	0	-0.569538	500 mM KCl	0.144846	0.181899
FUS-K9:188:x:FUS-K9:365	75 mM KCl	xlink	24.0079	0	21.2157	0.0833333	2.79216	500 mM KCl	3.58234e-06	1.68799e-05
FUS-K9:188:x:FUS-K9:367	75 mM KCl	xlink	25.2722	0	24.2252	0	1.04693	500 mM KCl	1.18862e-05	4.58466e-05
FUS-K9:188:x:FUS-K9:390	75 mM KCl	xlink	20.5917	1	21.7643	0	-1.17259	500 mM KCl	0.0329391	0.0482909
FUS-K9:188:x:HspB8:129	75 mM KCl	xlink	24.8955	0	20.526	1	4.36943	500 mM KCl	5.03384e-06	2.20401e-05
FUS-K9:198:x:FUS-K9:206	75 mM KCl	looplink	26.6047	0	27.3282	0	-0.723434	500 mM KCl	0.0131601	0.0213193
FUS-K9:198:x:FUS-K9:216	75 mM KCl	xlink	21.1454	1	25.5775	0	-4.43206	500 mM KCl	6.18517e-07	4.88779e-06
FUS-K9:198:x:FUS-K9:225	75 mM KCl	xlink	24.2141	0	25.6447	0	-1.43055	500 mM KCl	0.012149	0.0199946
FUS-K9:198:x:FUS-K9:32	75 mM KCl	xlink	22.4184	0	20.1425	1	2.27593	500 mM KCl	7.23384e-05	0.000219043
FUS-K9:198:x:FUS-K9:367	75 mM KCl	xlink	23.9034	0	20.1842	1	3.71914	500 mM KCl	1.53405e-06	9.28099e-06
FUS-K9:198:x:FUS-K9:390	75 mM KCl	xlink	24.1415	0	23.2296	0.0833333	0.911905	500 mM KCl	0.0687637	0.0932194
FUS-K9:198:x:FUS-K9:543	75 mM KCl	xlink	21.9374	0	21.5006	0	0.436776	500 mM KCl	0.428982	0.477629
FUS-K9:198:x:HspB8:	75 mM KCl	xlink	28.0333	0	20.2036	1	7.82964	500 mM KCl	1.84641e-09	6.05879e-08
FUS-K9:198:x:HspB8:120	75 mM KCl	xlink	24.7585	0	20.7292	0	4.02924	500 mM KCl	4.41036e-06	1.95748e-05
FUS-K9:198:x:HspB8:129	75 mM KCl	xlink	26.3437	0	23.4253	0	2.91846	500 mM KCl	8.03518e-07	5.5907e-06
FUS-K9:206	75 mM KCl	monolink	26.3684	0	26.1954	0	0.172982	500 mM KCl	0.576875	0.620955
FUS-K9:206:x:FUS-K9:216	75 mM KCl	looplink	26.241	0	26.6524	0	-0.411391	500 mM KCl	0.00858592	0.0144137
FUS-K9:206:x:FUS-K9:225	75 mM KCl	xlink	26.6151	0	27.9217	0	-1.30661	500 mM KCl	0.0141258	0.0226572
FUS-K9:206:x:FUS-K9:235	75 mM KCl	xlink	24.9682	0	25.9271	0	-0.958916	500 mM KCl	0.0531229	0.0751607
FUS-K9:206:x:FUS-K9:367	75 mM KCl	xlink	24.8977	0	23.8682	0	1.02955	500 mM KCl	0.00025576	0.000632566
FUS-K9:206:x:HspB8:	75 mM KCl	xlink	27.3141	0	20.9316	0.416667	6.38253	500 mM KCl	7.00091e-10	3.24042e-08
FUS-K9:206:x:HspB8:133	75 mM KCl	xlink	20.4069	0.166667	20.4184	1	-0.0114237	500 mM KCl	0.953656	0.956608
FUS-K9:216	75 mM KCl	monolink	26.9914	0	26.6616	0	0.329717	500 mM KCl	0.105669	0.136946
FUS-K9:216:x:FUS-K9:225	75 mM KCl	looplink	26.1312	0	27.6611	0	-1.52987	500 mM KCl	0.00378254	0.00684661
FUS-K9:216:x:FUS-K9:235	75 mM KCl	xlink	26.2441	0	27.4202	0	-1.17602	500 mM KCl	0.00646807	0.0112067
FUS-K9:216:x:HspB8:	75 mM KCl	xlink	26.1235	0	20.4934	0.833333	5.63011	500 mM KCl	7.11464e-07	5.12254e-06
FUS-K9:225	75 mM KCl	monolink	25.5166	0	25.5891	0	-0.0725076	500 mM KCl	0.83833	0.865029
FUS-K9:225:x:FUS-K9:235	75 mM KCl	looplink	26.9597	0	28.2348	0	-1.27505	500 mM KCl	7.31707e-06	3.0394e-05
FUS-K9:225:x:FUS-K9:367	75 mM KCl	xlink	24.9782	0	23.607	0.0833333	1.37117	500 mM KCl	0.0622101	0.0861371
FUS-K9:225:x:FUS-K9:390	75 mM KCl	xlink	24.4709	0	25.0507	0	-0.579802	500 mM KCl	0.227409	0.267929
FUS-K9:225:x:FUS-K9:78	75 mM KCl	xlink	21.6692	0	19.7589	0.5	1.91032	500 mM KCl	0.00169416	0.003347
FUS-K9:225:x:FUS-K9:98	75 mM KCl	xlink	20.7903	0.333333	20.8661	1	-0.075804	500 mM KCl	0.858887	0.880045
FUS-K9:225:x:HspB8:	75 mM KCl	xlink	27.2299	0	20.8481	0.583333	6.3818	500 mM KCl	2.79782e-09	6.47496e-08
FUS-K9:225:x:HspB8:129	75 mM KCl	xlink	25.5762	0	19.5377	0.333333	6.03853	500 mM KCl	3.191e-08	3.56512e-07
FUS-K9:225:x:HspB8:133	75 mM KCl	xlink	23.5673	0	19.9832	0.166667	3.5841	500 mM KCl	0.000102995	0.000295896
FUS-K9:23	75 mM KCl	monolink	28.4013	0	28.1573	0	0.244057	500 mM KCl	0.220968	0.264183
FUS-K9:23:x:FUS-K9:32	75 mM KCl	looplink	27.2952	0	27.4675	0	-0.172305	500 mM KCl	0.642285	0.680067
FUS-K9:23:x:FUS-K9:40	75 mM KCl	xlink	28.0115	0	27.6105	0	0.400981	500 mM KCl	0.0082586	0.0140094
FUS-K9:23:x:FUS-K9:50	75 mM KCl	xlink	24.9995	0	24.9681	0	0.0313525	500 mM KCl	0.914734	0.923283
FUS-K9:23:x:FUS-K9:60	75 mM KCl	xlink	23.7575	0	21.9655	0	1.792	500 mM KCl	0.0013479	0.00274667
FUS-K9:23:x:FUS-K9:69	75 mM KCl	xlink	24.3154	0	23.9284	0	0.386994	500 mM KCl	0.137401	0.173898
FUS-K9:23:x:FUS-K9:88	75 mM KCl	xlink	24.0475	0	23.0237	0	1.02378	500 mM KCl	0.000450275	0.00105717
FUS-K9:23:x:HspB8:	75 mM KCl	xlink	28.1581	0	23.7627	0.25	4.39539	500 mM KCl	0.000137301	0.000373657
FUS-K9:23:x:HspB8:120	75 mM KCl	xlink	24.6361	0	20.2263	1	4.40981	500 mM KCl	1.54683e-06	9.28099e-06
FUS-K9:23:x:HspB8:129	75 mM KCl	xlink	25.9026	0	21.1956	0	4.70696	500 mM KCl	2.41826e-06	1.26374e-05
FUS-K9:23:x:HspB8:133	75 mM KCl	xlink	24.3587	0	20.7226	1	3.63617	500 mM KCl	8.12194e-06	3.26982e-05
FUS-K9:235	75 mM KCl	monolink	28.1024	0	28.6636	0	-0.56119	500 mM KCl	0.0556421	0.0780435
FUS-K9:235:x:FUS-K9:297	75 mM KCl	xlink	20.3173	1	23.9952	0	-3.6779	500 mM KCl	6.76812e-07	5.0997e-06
FUS-K9:235:x:FUS-K9:367	75 mM KCl	xlink	24.8977	0	25.5612	0	-0.663576	500 mM KCl	0.224061	0.265997
FUS-K9:235:x:FUS-K9:390	75 mM KCl	xlink	24.1575	0	25.1899	0	-1.03244	500 mM KCl	0.0192847	0.0298959
FUS-K9:235:x:HspB8:120	75 mM KCl	xlink	24.4821	0	19.4823	0.333333	4.99981	500 mM KCl	1.3904e-06	8.83314e-06
FUS-K9:297:x:FUS-K9:367	75 mM KCl	xlink	25.5619	0	27.6079	0	-2.04599	500 mM KCl	3.17687e-07	2.63925e-06
FUS-K9:297:x:FUS-K9:390	75 mM KCl	xlink	23.9692	0	25.6904	0	-1.72115	500 mM KCl	0.000535954	0.00123155
FUS-K9:297:x:FUS-K9:398	75 mM KCl	xlink	24.4025	0	26.1458	0	-1.74321	500 mM KCl	3.35166e-05	0.00011299
FUS-K9:297:x:HspB8:	75 mM KCl	xlink	25.5983	0	21.9948	0.0833333	3.60353	500 mM KCl	0.00337675	0.0062163
FUS-K9:32	75 mM KCl	monolink	28.4666	0	27.8749	0	0.591692	500 mM KCl	7.00479e-05	0.000216148
FUS-K9:32:x:FUS-K9:367	75 mM KCl	xlink	24.245	0	22.719	0	1.5261	500 mM KCl	3.19903e-05	0.000109104
FUS-K9:32:x:FUS-K9:40	75 mM KCl	looplink	25.7644	0	26.0879	0	-0.32355	500 mM KCl	0.0632457	0.0871983
FUS-K9:32:x:FUS-K9:60	75 mM KCl	xlink	24.1522	0	22.9726	0	1.17955	500 mM KCl	0.00324053	0.0059996
FUS-K9:32:x:FUS-K9:69	75 mM KCl	xlink	23.9841	0	22.7798	0	1.20432	500 mM KCl	0.0139247	0.0224458
FUS-K9:32:x:FUS-K9:78	75 mM KCl	xlink	23.8573	0	20.8746	0.583333	2.98273	500 mM KCl	0.000119306	0.00033613
FUS-K9:32:x:HspB8:120	75 mM KCl	xlink	24.6106	0	20.6566	1	3.95404	500 mM KCl	5.6524e-08	5.90767e-07
FUS-K9:345	75 mM KCl	monolink	28.7085	0	28.2738	0	0.434615	500 mM KCl	0.0121054	0.0199946
FUS-K9:345:x:FUS-K9:349	75 mM KCl	xlink	33.0468	0	33.0092	0	0.0375409	500 mM KCl	0.562717	0.607735
FUS-K9:348:x:FUS-K9:349	75 mM KCl	looplink	28.4096	0	28.5015	0	-0.0918684	500 mM KCl	0.509489	0.555806
FUS-K9:349	75 mM KCl	monolink	29.9812	1	26.7161	0	3.26509	500 mM KCl	1.76408e-06	1.02065e-05
FUS-K9:349:x:FUS-K9:460	75 mM KCl	xlink	20.7718	0.75	20.6199	1	0.151921	500 mM KCl	0.558044	0.606202
FUS-K9:349:x:HspB8:	75 mM KCl	xlink	29.3426	0	23.6627	0.166667	5.67992	500 mM KCl	0.00127246	0.00262597
FUS-K9:349:x:HspB8:129	75 mM KCl	xlink	25.2287	0	20.4816	0.166667	4.74711	500 mM KCl	2.66759e-08	3.32423e-07
FUS-K9:349:x:HspB8:133	75 mM KCl	xlink	24.3968	0	20.6914	1	3.70538	500 mM KCl	1.91834e-07	1.63564e-06
FUS-K9:365	75 mM KCl	monolink	29.7894	0	29.3343	0	0.45503	500 mM KCl	0.00104276	0.00219663
FUS-K9:365:x:FUS-K9:367	75 mM KCl	looplink	27.7095	0	29.4675	0	-1.75798	500 mM KCl	0.000285289	0.00069499
FUS-K9:365:x:FUS-K9:398	75 mM KCl	xlink	26.9645	0	27.8191	0	-0.854578	500 mM KCl	6.16234e-05	0.000201677
FUS-K9:365:x:HspB8:120	75 mM KCl	xlink	20.8056	0.166667	19.7694	1	1.03619	500 mM KCl	0.0682527	0.0929154
FUS-K9:367	75 mM KCl	monolink	31.3841	0	31.3322	0	0.0518717	500 mM KCl	0.683724	0.721585
FUS-K9:367:x:FUS-K9:390	75 mM KCl	xlink	27.8318	0	26.6727	0	1.15907	500 mM KCl	1.2428e-05	4.73725e-05
FUS-K9:367:x:FUS-K9:398	75 mM KCl	xlink	29.0256	0	29.6436	0	-0.618083	500 mM KCl	6.55079e-06	2.75644e-05
FUS-K9:367:x:FUS-K9:460	75 mM KCl	xlink	20.6883	1	23.658	0.0833333	-2.96966	500 mM KCl	0.0124669	0.0202979
FUS-K9:367:x:FUS-K9:481	75 mM KCl	xlink	25.4531	0	26.0964	0	-0.643251	500 mM KCl	0.0485281	0.0692648
FUS-K9:367:x:FUS-K9:484	75 mM KCl	xlink	25.9704	0	26.7567	0	-0.786336	500 mM KCl	3.38272e-05	0.00011299
FUS-K9:367:x:FUS-K9:543	75 mM KCl	xlink	25.3815	0	25.4876	0	-0.106059	500 mM KCl	0.639995	0.679864
FUS-K9:367:x:FUS-K9:88	75 mM KCl	xlink	22.3859	0.166667	20.6351	0.0833333	1.75083	500 mM KCl	0.0608562	0.0846241
FUS-K9:367:x:HspB8:	75 mM KCl	xlink	29.4623	0	26.4632	0	2.99915	500 mM KCl	6.48111e-05	0.000206858
FUS-K9:367:x:HspB8:120	75 mM KCl	xlink	25.3251	0	22.1625	0	3.16258	500 mM KCl	0.000191446	0.000488414
FUS-K9:367:x:HspB8:133	75 mM KCl	xlink	25.282	0	21.8331	0	3.44896	500 mM KCl	2.07763e-08	2.92674e-07
FUS-K9:381	75 mM KCl	monolink	29.4718	0	29.0584	0	0.413348	500 mM KCl	0.117544	0.151128
FUS-K9:381:x:FUS-K9:390	75 mM KCl	looplink	25.9876	0	24.7565	0	1.2311	500 mM KCl	0.00513166	0.00898735
FUS-K9:390	75 mM KCl	monolink	30.5699	0	30.8029	0	-0.233025	500 mM KCl	0.186138	0.22758
FUS-K9:390:x:FUS-K9:390	75 mM KCl	xlink	21.5583	0	21.029	1	0.529253	500 mM KCl	0.46887	0.514962
FUS-K9:390:x:FUS-K9:398	75 mM KCl	looplink	29.7089	0	29.7179	0	-0.0090471	500 mM KCl	0.622367	0.664079
FUS-K9:390:x:HspB8:	75 mM KCl	xlink	30.2744	0	28.1887	0	2.0857	500 mM KCl	9.02853e-07	6.09426e-06
FUS-K9:390:x:HspB8:111	75 mM KCl	xlink	27.4483	0	20.5057	1	6.94262	500 mM KCl	2.43359e-09	6.06525e-08
FUS-K9:390:x:HspB8:120	75 mM KCl	xlink	26.2771	0	23.7022	0	2.57492	500 mM KCl	5.28428e-05	0.000174705
FUS-K9:390:x:HspB8:142	75 mM KCl	xlink	28.3518	0	27.8419	0	0.50991	500 mM KCl	0.0247431	0.0372872
FUS-K9:398	75 mM KCl	monolink	29.5168	0	29.5294	0	-0.0125354	500 mM KCl	0.894276	0.905455
FUS-K9:398:x:HspB8:	75 mM KCl	xlink	29.087	0	23.1796	0	5.90739	500 mM KCl	0.000168571	0.000433468
FUS-K9:398:x:HspB8:111	75 mM KCl	xlink	28.555	0	23.4542	0	5.10079	500 mM KCl	2.88849e-06	1.4398e-05
FUS-K9:398:x:HspB8:118	75 mM KCl	xlink	28.8557	0	23.5788	0	5.2769	500 mM KCl	7.02338e-07	5.12254e-06
FUS-K9:398:x:HspB8:120	75 mM KCl	xlink	24.7165	0	21.0373	0.0833333	3.67924	500 mM KCl	1.34277e-07	1.31836e-06
FUS-K9:398:x:HspB8:129	75 mM KCl	xlink	24.1156	0	20.9577	1	3.15788	500 mM KCl	2.96862e-06	1.45732e-05
FUS-K9:40	75 mM KCl	monolink	27.8089	0	27.589	0	0.219923	500 mM KCl	0.379936	0.428917
FUS-K9:40:x:FUS-K9:50	75 mM KCl	looplink	26.4841	0	27.4655	0	-0.981364	500 mM KCl	0.00842157	0.0142114
FUS-K9:40:x:FUS-K9:60	75 mM KCl	xlink	25.3494	0	25.5623	0	-0.212948	500 mM KCl	0.100269	0.130471
FUS-K9:40:x:FUS-K9:88	75 mM KCl	xlink	22.7519	0	20.611	0.333333	2.14085	500 mM KCl	0.000167202	0.000433387
FUS-K9:40:x:HspB8:	75 mM KCl	xlink	27.4664	0	20.6343	0.833333	6.83211	500 mM KCl	1.80089e-08	2.65222e-07
FUS-K9:40:x:HspB8:120	75 mM KCl	xlink	22.9551	0	20.5804	1	2.37465	500 mM KCl	0.000124315	0.000344256
FUS-K9:40:x:HspB8:129	75 mM KCl	xlink	23.2955	0	20.8484	1	2.44712	500 mM KCl	3.05093e-05	0.000105365
FUS-K9:40:x:HspB8:133	75 mM KCl	xlink	20.1319	0.166667	20.9646	1	-0.832638	500 mM KCl	0.209499	0.253275
FUS-K9:460	75 mM KCl	monolink	29.835	0	30.431	0	-0.595924	500 mM KCl	0.00138046	0.00279544
FUS-K9:481	75 mM KCl	monolink	32.1867	0	33.1002	0	-0.91353	500 mM KCl	0.00153438	0.00306877
FUS-K9:481:x:FUS-K9:484	75 mM KCl	looplink	30.8612	0	31.5354	0	-0.674212	500 mM KCl	0.000865986	0.00189581
FUS-K9:481:x:FUS-K9:543	75 mM KCl	xlink	25.9181	0	26.7768	0	-0.858696	500 mM KCl	0.0295664	0.0435433
FUS-K9:484	75 mM KCl	monolink	33.6593	0	33.979	0	-0.319681	500 mM KCl	0.000988828	0.00212172
FUS-K9:484:x:FUS-K9:543	75 mM KCl	xlink	26.7612	0	27.3679	0	-0.606643	500 mM KCl	0.0276982	0.0411662
FUS-K9:484:x:HspB8:	75 mM KCl	xlink	27.1174	0	24.8707	0	2.24676	500 mM KCl	0.00237971	0.00453544
FUS-K9:50	75 mM KCl	monolink	28.1469	1	28.2877	0	-0.140799	500 mM KCl	0.182398	0.223852
FUS-K9:50:x:FUS-K9:60	75 mM KCl	looplink	20.4766	1	26.7412	0	-6.26461	500 mM KCl	1.15085e-08	1.86438e-07
FUS-K9:50:x:FUS-K9:69	75 mM KCl	xlink	25.2532	0	25.4359	0	-0.182734	500 mM KCl	0.260356	0.301269
FUS-K9:50:x:HspB8:	75 mM KCl	xlink	25.2309	0	20.343	1	4.88796	500 mM KCl	1.49172e-07	1.42152e-06
FUS-K9:50:x:HspB8:129	75 mM KCl	xlink	23.2341	0	20.4486	1	2.78557	500 mM KCl	1.95741e-05	7.12584e-05
FUS-K9:543:x:FUS-K9:88	75 mM KCl	xlink	22.9645	0	20.3448	1	2.61968	500 mM KCl	7.87269e-05	0.000231887
FUS-K9:543:x:HspB8:	75 mM KCl	xlink	29.7833	0	28.2613	0	1.522	500 mM KCl	0.000234392	0.000584177
FUS-K9:543:x:HspB8:102	75 mM KCl	xlink	25.2055	0	22.4778	0.166667	2.72775	500 mM KCl	0.00439211	0.00786211
FUS-K9:543:x:HspB8:111	75 mM KCl	xlink	27.7892	0	24.9423	0	2.84687	500 mM KCl	2.63909e-05	9.29418e-05
FUS-K9:543:x:HspB8:118	75 mM KCl	xlink	26.0003	0	22.3742	0	3.62613	500 mM KCl	0.000411323	0.000972765
FUS-K9:543:x:HspB8:120	75 mM KCl	xlink	24.5902	0	21.4018	0.0833333	3.18839	500 mM KCl	0.0017993	0.00351189
FUS-K9:543:x:HspB8:129	75 mM KCl	xlink	26.8679	0	25.1157	0	1.75218	500 mM KCl	0.00128594	0.002637
FUS-K9:543:x:HspB8:133	75 mM KCl	xlink	26.2472	0	23.8815	0	2.36569	500 mM KCl	1.36278e-05	5.13418e-05
FUS-K9:60	75 mM KCl	monolink	27.656	0	27.2317	0	0.424311	500 mM KCl	0.079	0.105333
FUS-K9:60:x:FUS-K9:69	75 mM KCl	looplink	25.4833	0	26.4517	0	-0.968366	500 mM KCl	0.0255317	0.0382975
FUS-K9:60:x:FUS-K9:78	75 mM KCl	xlink	26.6932	0	26.6507	0	0.0424548	500 mM KCl	0.756356	0.793072
FUS-K9:60:x:FUS-K9:88	75 mM KCl	xlink	24.0676	0	22.644	0.0833333	1.42359	500 mM KCl	2.07456e-06	1.13925e-05
FUS-K9:60:x:HspB8:	75 mM KCl	xlink	24.7583	0	21.0445	1	3.71377	500 mM KCl	0.000119233	0.00033613
FUS-K9:69	75 mM KCl	monolink	28.0099	0	27.5177	0	0.492227	500 mM KCl	0.0236412	0.0357933
FUS-K9:69:x:FUS-K9:78	75 mM KCl	looplink	27.6057	0	28.0597	0	-0.454023	500 mM KCl	0.0437777	0.0630399
FUS-K9:69:x:FUS-K9:88	75 mM KCl	xlink	27.4096	0	27.5382	0	-0.128675	500 mM KCl	0.319705	0.363582
FUS-K9:69:x:FUS-K9:98	75 mM KCl	xlink	24.6757	0	25.0383	0	-0.362618	500 mM KCl	0.193771	0.236022
FUS-K9:69:x:HspB8:	75 mM KCl	xlink	28.0818	0	21.1105	0.416667	6.97133	500 mM KCl	4.39566e-12	1.42419e-09
FUS-K9:69:x:HspB8:129	75 mM KCl	xlink	24.807	0	20.6627	0.5	4.14429	500 mM KCl	2.99943e-08	3.47076e-07
FUS-K9:78	75 mM KCl	monolink	29.1158	0	28.5544	0	0.561362	500 mM KCl	0.00104408	0.00219663
FUS-K9:78:x:FUS-K9:88	75 mM KCl	looplink	24.6652	0	27.6244	0	-2.95916	500 mM KCl	4.09674e-09	8.2959e-08
FUS-K9:78:x:FUS-K9:98	75 mM KCl	xlink	27.381	0	27.1703	0	0.210726	500 mM KCl	0.196912	0.23895
FUS-K9:78:x:HspB8:	75 mM KCl	xlink	27.9222	0	20.5004	1	7.42181	500 mM KCl	1.14402e-10	9.26652e-09
FUS-K9:78:x:HspB8:118	75 mM KCl	xlink	22.463	0.0833333	20.9443	1	1.51868	500 mM KCl	0.00547872	0.00954357
FUS-K9:78:x:HspB8:120	75 mM KCl	xlink	24.4605	0	20.5432	1	3.91726	500 mM KCl	3.125e-06	1.51119e-05
FUS-K9:78:x:HspB8:133	75 mM KCl	xlink	23.6656	0	20.8231	1	2.84251	500 mM KCl	9.40857e-05	0.000274628
FUS-K9:88	75 mM KCl	monolink	28.8104	0	26.3841	1	2.42623	500 mM KCl	2.81545e-08	3.37854e-07
FUS-K9:88:x:FUS-K9:98	75 mM KCl	looplink	28.2871	0	28.24	0	0.0471823	500 mM KCl	0.822045	0.850934
FUS-K9:88:x:HspB8:	75 mM KCl	xlink	28.6126	0	22.7649	0.166667	5.84771	500 mM KCl	0.000150688	0.000393734
FUS-K9:88:x:HspB8:129	75 mM KCl	xlink	25.5104	0	20.5485	0.416667	4.96188	500 mM KCl	5.0298e-09	9.58621e-08
FUS-K9:98:x:HspB8:	75 mM KCl	xlink	28.1327	0	22.1668	0.333333	5.96592	500 mM KCl	3.5948e-06	1.68799e-05
FUS-K9:98:x:HspB8:118	75 mM KCl	xlink	23.5826	0	20.14	1	3.44259	500 mM KCl	1.03076e-05	4.0237e-05
FUS-K9:98:x:HspB8:129	75 mM KCl	xlink	25.0411	0	20.0465	1	4.99466	500 mM KCl	2.63952e-08	3.32423e-07
FUS-K9:98:x:HspB8:133	75 mM KCl	xlink	23.6732	0	20.8225	1	2.85072	500 mM KCl	2.48722e-06	1.27914e-05
HspB8:	75 mM KCl	monolink	36.695	0	36.4722	0	0.222794	500 mM KCl	0.0496621	0.0705725
HspB8::x:HspB8:	75 mM KCl	xlink	33.8238	0	32.6416	0	1.18218	500 mM KCl	0.0185139	0.0288389
HspB8::x:HspB8:102	75 mM KCl	xlink	33.3853	0	32.9411	0	0.444201	500 mM KCl	0.0414982	0.0602933
HspB8::x:HspB8:111	75 mM KCl	xlink	34.1746	0	33.4176	0	0.757012	500 mM KCl	0.000393225	0.000943739
HspB8::x:HspB8:118	75 mM KCl	xlink	32.7856	0	31.8945	0	0.891105	500 mM KCl	0.000144878	0.000384757
HspB8::x:HspB8:120	75 mM KCl	xlink	31.7241	0	31.0759	0	0.64826	500 mM KCl	0.0028204	0.00531285
HspB8::x:HspB8:129	75 mM KCl	xlink	32.9506	0	32.422	0	0.528603	500 mM KCl	8.43587e-06	3.3332e-05
HspB8::x:HspB8:133	75 mM KCl	xlink	30.754	0	29.3914	0	1.3626	500 mM KCl	2.85585e-06	1.4398e-05
HspB8::x:HspB8:142	75 mM KCl	xlink	30.5721	0	29.0642	0	1.50785	500 mM KCl	1.69924e-05	6.25631e-05
HspB8:102	75 mM KCl	monolink	36.3854	0	36.8955	0	-0.510099	500 mM KCl	0.0046783	0.0082829
HspB8:102:x:HspB8:111	75 mM KCl	looplink	34.432	0	33.9971	0	0.43491	500 mM KCl	0.155928	0.19431
HspB8:111	75 mM KCl	monolink	34.9474	0	33.5903	0	1.35714	500 mM KCl	7.13329e-05	0.000218037
HspB8:111:x:HspB8:118	75 mM KCl	looplink	32.1873	0	31.5555	0	0.631762	500 mM KCl	0.0261698	0.0390738
HspB8:111:x:HspB8:120	75 mM KCl	looplink	33.0175	0	32.6082	0	0.409282	500 mM KCl	0.0171641	0.0269959
HspB8:111:x:HspB8:120	75 mM KCl	xlink	30.6541	0	30.0312	0	0.622947	500 mM KCl	0.0596155	0.0832561
HspB8:111:x:HspB8:129	75 mM KCl	xlink	34.8442	0	33.6433	0	1.20093	500 mM KCl	7.374e-05	0.00022122
HspB8:111:x:HspB8:133	75 mM KCl	xlink	31.3587	0	30.5913	0	0.767464	500 mM KCl	2.19379e-06	1.17629e-05
HspB8:111:x:HspB8:142	75 mM KCl	xlink	29.8912	0	27.9561	0	1.93519	500 mM KCl	2.21461e-06	1.17629e-05
HspB8:118	75 mM KCl	monolink	36.0366	0	35.4726	0	0.564033	500 mM KCl	0.000141501	0.000378895
HspB8:118:x:HspB8:120	75 mM KCl	looplink	33.4667	0	32.7938	0	0.672976	500 mM KCl	8.17454e-06	3.26982e-05
HspB8:118:x:HspB8:120	75 mM KCl	xlink	27.3239	0	25.5189	0	1.80504	500 mM KCl	2.35767e-09	6.06525e-08
HspB8:118:x:HspB8:129	75 mM KCl	xlink	35.2446	0	34.4477	0	0.796971	500 mM KCl	7.49952e-05	0.000222921
HspB8:118:x:HspB8:133	75 mM KCl	xlink	27.2952	0	25.923	0	1.37216	500 mM KCl	0.000783369	0.00175043
HspB8:120	75 mM KCl	monolink	34.7474	0	34.4571	0	0.29027	500 mM KCl	0.0336937	0.0491746
HspB8:120:x:HspB8:120	75 mM KCl	xlink	24.9057	0	23.627	0	1.27867	500 mM KCl	3.84016e-06	1.75241e-05
HspB8:120:x:HspB8:129	75 mM KCl	looplink	29.9534	0	30.7649	0	-0.81149	500 mM KCl	0.760532	0.794878
HspB8:120:x:HspB8:129	75 mM KCl	xlink	29.714	0	28.996	0	0.717996	500 mM KCl	2.40174e-05	8.58341e-05
HspB8:120:x:HspB8:133	75 mM KCl	xlink	29.2199	0	29.3553	0	-0.135387	500 mM KCl	0.583849	0.626381
HspB8:120:x:HspB8:142	75 mM KCl	xlink	25.9109	0	25.1821	0	0.728798	500 mM KCl	0.00704135	0.0120709
HspB8:129	75 mM KCl	monolink	34.6413	0	34.5248	0	0.116479	500 mM KCl	0.381638	0.429342
HspB8:129:x:HspB8:129	75 mM KCl	xlink	29.3643	0	28.3744	0	0.989897	500 mM KCl	0.000103198	0.000295896
HspB8:129:x:HspB8:133	75 mM KCl	looplink	31.009	0	31.7867	0	-0.777718	500 mM KCl	0.0729215	0.0980355
HspB8:129:x:HspB8:133	75 mM KCl	xlink	28.0061	0	26.6539	0	1.35221	500 mM KCl	2.41077e-05	8.58341e-05
HspB8:129:x:HspB8:142	75 mM KCl	looplink	31.0486	0	30.6251	0	0.42344	500 mM KCl	0.465164	0.51263
HspB8:129:x:HspB8:142	75 mM KCl	xlink	29.3683	0	28.6242	0	0.744109	500 mM KCl	0.000223189	0.000560568
HspB8:133	75 mM KCl	monolink	33.976	0	34.3817	0	-0.405782	500 mM KCl	0.00199986	0.00387998
HspB8:133:x:HspB8:133	75 mM KCl	xlink	25.5649	0	23.8611	0	1.70381	500 mM KCl	0.000725345	0.00164344
HspB8:133:x:HspB8:142	75 mM KCl	looplink	28.7647	0	28.6917	0	0.0730099	500 mM KCl	0.623086	0.664079
HspB8:133:x:HspB8:142	75 mM KCl	xlink	25.7595	0	23.4912	0.0833333	2.26831	500 mM KCl	0.000342663	0.000828527
HspB8:142	75 mM KCl	monolink	31.4352	0	28.6489	0	2.7863	500 mM KCl	2.45548e-08	3.31489e-07
HspB8:142:x:HspB8:142	75 mM KCl	xlink	28.1759	0	25.3274	0	2.84846	500 mM KCl	3.67741e-06	1.70212e-05
HspB8:142:x:HspB8:146	75 mM KCl	looplink	32.6686	0	32.5972	0	0.0713225	500 mM KCl	0.279059	0.320622
HspB8:142:x:HspB8:147	75 mM KCl	looplink	32.6725	0	32.5973	0	0.0751898	500 mM KCl	0.220155	0.264183
HspB8:146	75 mM KCl	monolink	27.3551	0	27.0036	0	0.351552	500 mM KCl	0.0890712	0.117792
