# Supplementary material for: HspB8 prevents aberrant phase transitions of FUS by chaperoning its folded RNA-binding domain
Source: eLife. 2021 Sep 6;10:e69377. doi: 10.7554/eLife.69377 (PMC8510580; doi:10.7554/eLife.69377)
Supplement: Supplementary file 5. [file elife-69377-supp5.xlsx]

## Sheet: Legend
Legends for Supplemental Data 5
Supplemental Table 1. FUSB8 RNA Experiment Crosslink Identification. Related to Figure 5D, S5C
Legend referring to Table S1
uxID	unique lysine to lysine crosslinking site, includes crosslinked protein names and absolute position of crosslinked lysine. All peptides linking the same lysines (different cleavage sites, charge states and heavy/light pairs) belong to a single uxID
Id	amino acid sequence of crosslinked peptide a and peptide b including the position of crosslinking sites in peptide a and peptide b
Protein1	name of protein to which peptide a belongs
Protein2	name of protein to which peptide b belongs
XLType	type of linker attachment (inter-protein crosslink, intra-protein crosslink, looplink or monolink).Looplink, a link between two lysines within one peptide.
AbsPos1	absolute position of crosslinked lysine residue in protein 1 (including 5 AA N-terminal tag)
AbsPos2	absolute position of crosslinked lysine residue in protein 2 (including 5 AA N-terminal tag)
deltaS	deltaS score is a measure for how close the best assigned hit scored in regard to second best
ld-Score	linear discriminant score; scoring scheme to discriminate between true positive crosslinks and false positive hits																									FDR	FDR	FDR	FDR	FDR	FDR	FDR	FDR	FDR	FDR	FDR	FDR	FDR	FDR	FDR	FDR	FDR	FDR	FDR	FDR	FDR	FDR	FDR	FDR
FDR	FDR was calculated by xProphet as described (Leitner et al., Nat Protoc, 2014). FDR filtering was done on the uxID level and only uxIDs with an FDR ≤ 0.05 in at least one replicate were considered
No of Ids in triplicates	indicates in how many of three replicates the corresponding uxID was identified
[truncated: 5,000 more columns]

## Sheet: Table S1
Supplemental Table 1. FUSB8 RNA Experiment Crosslink Identification. Related to Figure 5D, S5C
Crosslinks were only considered if they were identified with a minimum ld-Score of 25 and deltaS ≤ 0.95. FDR < 0.05 in at least one replicate (Filtering was performed on the level of the unique crosslinking site)
Only the highest scoring unique crosslink site of each replicate is shown
uxID	Id	Protein1	Protein2	XLType	AbsPos1	AbsPos2	deltaS	ld-Score	FDR	Experiment
FUS:311	HDSEQDNSDNNTIFVQGLGENVTIESVADYFKQIGIIK-K32-156	FUS	-	monolink	311		0	50.75	0	no RNA 1
FUS:337	TGQPMINLYTDRETGKLK-K16-156	FUS	-	monolink	337		0	26.16	0	no RNA 1
FUS:339	LKGEATVSFDDPPSAK-K2-156	FUS	-	monolink	339		0.23	46.27	0	no RNA 1
FUS:353	LKGEATVSFDDPPSAKAAIDWFDGK-K16-155	FUS	-	monolink	353		0.01	38.34	0	no RNA 1
FUS:362	AAIDWFDGKEFSGNPIK-K9-155	FUS	-	monolink	362		0.08	51.04	0	no RNA 1
FUS:370	EFSGNPIKVSFATR-K8-156	FUS	-	monolink	370		0	53.44	0	no RNA 1
FUS:432	AGDWKCPNPTCENMNFSWR-K5-155	FUS	-	monolink	432		0.07	46.73	0	no RNA 1
FUS:453	NECNQCKAPKPDGPGGGPGGSHMGGNYGDDR-K7-155	FUS	-	monolink	453		0	38.53	0	no RNA 1
FUS:456	APKPDGPGGGPGGSHMGGNYGDDR-K3-155	FUS	-	monolink	456		0	41.31	0	no RNA 1
HspB8:102	TPPPFPGEPWKVCVNVHSFKPEELMVK-K11-156	HspB8	-	monolink	102		0	29.39	0	no RNA 1
HspB8:111	VCVNVHSFKPEELMVK-K9-156	HspB8	-	monolink	111		0.31	38.09	0	no RNA 1
HspB8:118	VCVNVHSFKPEELMVKTK-K16-156	HspB8	-	monolink	118		0.16	41.64	0	no RNA 1
HspB8:120	VCVNVHSFKPEELMVKTK-K18-155	HspB8	-	monolink	120		0.13	40.95	0	no RNA 1
HspB8:129	DGYVEVSGKHEEKQQEGGIVSK-K9-155	HspB8	-	monolink	129		0.23	41	0	no RNA 1
HspB8:133	HEEKQQEGGIVSK-K4-156	HspB8	-	monolink	133		0.31	47.9	0	no RNA 1
HspB8:142	QQEGGIVSKNFTKK-K9-156	HspB8	-	monolink	142		0	30.36	0	no RNA 1
FUS:269:x:FUS:321	KTGQPMINLYTDR-GGFNKFGGPR-a1-b5	FUS	FUS	intra-protein xl	321	269	0	37.76	0	no RNA 1
FUS:269:x:FUS:337	GGFNKFGGPR-ETGKLK-a5-b4	FUS	FUS	intra-protein xl	269	337	0	34.74	0	no RNA 1
FUS:269:x:FUS:339	LKGEATVSFDDPPSAK-GGFNKFGGPR-a2-b5	FUS	FUS	intra-protein xl	339	269	0.36	42.74	0	no RNA 1
FUS:269:x:FUS:362	AAIDWFDGKEFSGNPIK-GGFNKFGGPR-a9-b5	FUS	FUS	intra-protein xl	362	269	0	31.96	0	no RNA 1
FUS:269:x:FUS:370	EFSGNPIKVSFATR-GGFNKFGGPR-a8-b5	FUS	FUS	intra-protein xl	370	269	0	37.73	0	no RNA 1
FUS:269:x:FUS:432	AGDWKCPNPTCENMNFSWR-GGFNKFGGPR-a5-b5	FUS	FUS	intra-protein xl	432	269	0	42.93	0	no RNA 1
FUS:269:x:FUS:456	APKPDGPGGGPGGSHMGGNYGDDR-GGFNKFGGPR-a3-b5	FUS	FUS	intra-protein xl	456	269	0	36.4	0	no RNA 1
FUS:269:x:FUS:515	GGFGPGKMDSR-GGFNKFGGPR-a7-b5	FUS	FUS	intra-protein xl	515	269	0.63	46.4	0	no RNA 1
FUS:317:x:FUS:321	KTGQPMINLYTDR-QIGIIKTNK-a1-b6	FUS	FUS	intra-protein xl	321	317	0	34.23	0	no RNA 1
FUS:317:x:FUS:337	QIGIIKTNK-ETGKLK-a6-b4	FUS	FUS	intra-protein xl	317	337	0.67	28.65	0	no RNA 1
FUS:317:x:FUS:362	AAIDWFDGKEFSGNPIK-QIGIIKTNK-a9-b6	FUS	FUS	intra-protein xl	362	317	0.57	27.57	0	no RNA 1
FUS:317:x:FUS:515	GGFGPGKMDSR-QIGIIKTNK-a7-b6	FUS	FUS	intra-protein xl	515	317	0	26.46	0	no RNA 1
FUS:321:x:FUS:337	KTGQPMINLYTDR-ETGKLK-a1-b4	FUS	FUS	intra-protein xl	321	337	0.33	31.99	0	no RNA 1
FUS:321:x:FUS:339	LKGEATVSFDDPPSAK-KTGQPMINLYTDR-a2-b1	FUS	FUS	intra-protein xl	339	321	0	34.4	0	no RNA 1
FUS:321:x:FUS:362	AAIDWFDGKEFSGNPIK-KTGQPMINLYTDR-a9-b1	FUS	FUS	intra-protein xl	362	321	0.67	28.98	0	no RNA 1
FUS:321:x:FUS:370	EFSGNPIKVSFATR-KTGQPMINLYTDR-a8-b1	FUS	FUS	intra-protein xl	370	321	0	38.51	0	no RNA 1
FUS:321:x:FUS:432	AGDWKCPNPTCENMNFSWR-KTGQPMINLYTDR-a5-b1	FUS	FUS	intra-protein xl	432	321	0	36.48	0	no RNA 1
FUS:321:x:FUS:456	APKPDGPGGGPGGSHMGGNYGDDR-KTGQPMINLYTDR-a3-b1	FUS	FUS	intra-protein xl	456	321	0	25.78	0	no RNA 1
FUS:321:x:FUS:515	KTGQPMINLYTDR-GGFGPGKMDSR-a1-b7	FUS	FUS	intra-protein xl	321	515	0	34	0	no RNA 1
FUS:337:x:FUS:339	LKGEATVSFDDPPSAK-ETGKLK-a2-b4	FUS	FUS	intra-protein xl	339	337	0.41	28.32	0	no RNA 1
FUS:337:x:FUS:362	AAIDWFDGKEFSGNPIK-ETGKLK-a9-b4	FUS	FUS	intra-protein xl	362	337	0.25	30.72	0	no RNA 1
FUS:337:x:FUS:370	EFSGNPIKVSFATR-ETGKLK-a8-b4	FUS	FUS	intra-protein xl	370	337	0.24	32.32	0	no RNA 1
FUS:337:x:FUS:432	AGDWKCPNPTCENMNFSWR-ETGKLK-a5-b4	FUS	FUS	intra-protein xl	432	337	0.24	29.15	0	no RNA 1
FUS:337:x:FUS:453	NECNQCKAPKPDGPGGGPGGSHMGGNYGDDR-ETGKLK-a7-b4	FUS	FUS	intra-protein xl	453	337	0	26.04	0	no RNA 1
FUS:337:x:FUS:515	GGFGPGKMDSR-ETGKLK-a7-b4	FUS	FUS	intra-protein xl	515	337	0.83	27.9	0	no RNA 1
FUS:339:x:FUS:362	AAIDWFDGKEFSGNPIK-LKGEATVSFDDPPSAK-a9-b2	FUS	FUS	intra-protein xl	362	339	0.55	41.18	0	no RNA 1
FUS:339:x:FUS:370	LKGEATVSFDDPPSAK-EFSGNPIKVSFATR-a2-b8	FUS	FUS	intra-protein xl	339	370	0.14	34.64	0	no RNA 1
FUS:339:x:FUS:432	AGDWKCPNPTCENMNFSWR-LKGEATVSFDDPPSAK-a5-b2	FUS	FUS	intra-protein xl	432	339	0.43	37.14	0	no RNA 1
FUS:339:x:FUS:456	APKPDGPGGGPGGSHMGGNYGDDR-LKGEATVSFDDPPSAK-a3-b2	FUS	FUS	intra-protein xl	456	339	0.42	29.11	0	no RNA 1
FUS:339:x:FUS:515	LKGEATVSFDDPPSAK-GGFGPGKMDSR-a2-b7	FUS	FUS	intra-protein xl	339	515	0.35	43.38	0	no RNA 1
FUS:362:x:FUS:370	AAIDWFDGKEFSGNPIK-EFSGNPIKVSFATR-a9-b8	FUS	FUS	intra-protein xl	362	370	0.61	29.07	0	no RNA 1
FUS:362:x:FUS:432	AGDWKCPNPTCENMNFSWR-AAIDWFDGKEFSGNPIK-a5-b9	FUS	FUS	intra-protein xl	432	362	0	45.53	0	no RNA 1
FUS:362:x:FUS:515	AAIDWFDGKEFSGNPIK-GGFGPGKMDSR-a9-b7	FUS	FUS	intra-protein xl	362	515	0.09	49.87	0	no RNA 1
FUS:370:x:FUS:370	EFSGNPIKVSFATR-EFSGNPIKVSFATR-a8-b8	FUS	FUS	intra-protein xl	370	370	0	27.55	0	no RNA 1
FUS:370:x:FUS:432	AGDWKCPNPTCENMNFSWR-EFSGNPIKVSFATR-a5-b8	FUS	FUS	intra-protein xl	432	370	0.6	36.76	0	no RNA 1
FUS:370:x:FUS:515	EFSGNPIKVSFATR-GGFGPGKMDSR-a8-b7	FUS	FUS	intra-protein xl	370	515	0	35.08	0	no RNA 1
FUS:432:x:FUS:453	NECNQCKAPKPDGPGGGPGGSHMGGNYGDDR-AGDWKCPNPTCENMNFSWR-a7-b5	FUS	FUS	intra-protein xl	453	432	0.69	29.05	0	no RNA 1
FUS:432:x:FUS:456	APKPDGPGGGPGGSHMGGNYGDDR-AGDWKCPNPTCENMNFSWR-a3-b5	FUS	FUS	intra-protein xl	456	432	0.5	40.76	0	no RNA 1
FUS:432:x:FUS:515	AGDWKCPNPTCENMNFSWR-GGFGPGKMDSR-a5-b7	FUS	FUS	intra-protein xl	432	515	0	40.46	0	no RNA 1
FUS:453:x:FUS:515	NECNQCKAPKPDGPGGGPGGSHMGGNYGDDR-GGFGPGKMDSR-a7-b7	FUS	FUS	intra-protein xl	453	515	0.53	32.91	0	no RNA 1
FUS:456:x:FUS:515	APKPDGPGGGPGGSHMGGNYGDDR-GGFGPGKMDSR-a3-b7	FUS	FUS	intra-protein xl	456	515	0	32.87	0	no RNA 1
FUS:515:x:FUS:515	GGFGPGKMDSR-GGFGPGKMDSR-a7-b7	FUS	FUS	intra-protein xl	515	515	0	37.89	0	no RNA 1
HspB8:102:x:HspB8:120	TPPPFPGEPWKVCVNVHSFKPEELMVK-TKDGYVEVSGK-a11-b2	HspB8	HspB8	intra-protein xl	102	120	0	29.99	0	no RNA 1
HspB8:111:x:HspB8:120	VCVNVHSFKPEELMVK-TKDGYVEVSGK-a9-b2	HspB8	HspB8	intra-protein xl	111	120	0.69	36.11	0	no RNA 1
HspB8:111:x:HspB8:129	VCVNVHSFKPEELMVK-DGYVEVSGKHEEK-a9-b9	HspB8	HspB8	intra-protein xl	111	129	0.61	36.36	0	no RNA 1
HspB8:118:x:HspB8:129	VCVNVHSFKPEELMVKTK-DGYVEVSGKHEEK-a16-b9	HspB8	HspB8	intra-protein xl	118	129	0.74	35.02	0	no RNA 1
HspB8:120:x:HspB8:129	DGYVEVSGKHEEK-TKDGYVEVSGK-a9-b2	HspB8	HspB8	intra-protein xl	129	120	0.79	44.98	0	no RNA 1
HspB8:120:x:HspB8:133	HEEKQQEGGIVSK-TKDGYVEVSGK-a4-b2	HspB8	HspB8	intra-protein xl	133	120	0.63	43.9	0	no RNA 1
HspB8:129:x:HspB8:129	DGYVEVSGKHEEK-DGYVEVSGKHEEK-a9-b9	HspB8	HspB8	intra-protein xl	129	129	0.74	36.38	0	no RNA 1
HspB8:129:x:HspB8:142	DGYVEVSGKHEEK-QQEGGIVSKNFTK-a9-b9	HspB8	HspB8	intra-protein xl	129	142	0.83	25.43	0	no RNA 1
FUS:311:x:FUS:317	HDSEQDNSDNNTIFVQGLGENVTIESVADYFKQIGIIKTNK-K32-K38	FUS	-	looplink	311	317	0	32.14	0	no RNA 1
FUS:320:x:FUS:321	TNKKTGQPMINLYTDR-K3-K4	FUS	-	looplink	320	321	0	36.76	0	no RNA 1
FUS:337:x:FUS:339	ETGKLKGEATVSFDDPPSAK-K4-K6	FUS	-	looplink	337	339	0	42.85	0	no RNA 1
FUS:339:x:FUS:353	LKGEATVSFDDPPSAKAAIDWFDGK-K2-K16	FUS	-	looplink	339	353	0.24	25	0	no RNA 1
FUS:353:x:FUS:362	GEATVSFDDPPSAKAAIDWFDGKEFSGNPIK-K14-K23	FUS	-	looplink	353	362	0.08	34.83	0	no RNA 1
FUS:362:x:FUS:370	AAIDWFDGKEFSGNPIKVSFATR-K9-K17	FUS	-	looplink	362	370	0	34.37	0	no RNA 1
FUS:453:x:FUS:456	NECNQCKAPKPDGPGGGPGGSHMGGNYGDDR-K7-K10	FUS	-	looplink	453	456	0.03	31.4	0	no RNA 1
HspB8:111:x:HspB8:118	VCVNVHSFKPEELMVKTK-K9-K16	HspB8	-	looplink	111	118	0.35	36.01	0	no RNA 1
HspB8:111:x:HspB8:120	VCVNVHSFKPEELMVKTKDGYVEVSGK-K9-K18	HspB8	-	looplink	111	120	0	36.1	0	no RNA 1
HspB8:118:x:HspB8:120	VCVNVHSFKPEELMVKTKDGYVEVSGK-K16-K18	HspB8	-	looplink	118	120	0	48.17	0	no RNA 1
HspB8:120:x:HspB8:129	TKDGYVEVSGKHEEK-K2-K11	HspB8	-	looplink	120	129	0.48	25.86	0	no RNA 1
HspB8:129:x:HspB8:133	DGYVEVSGKHEEKQQEGGIVSK-K9-K13	HspB8	-	looplink	129	133	0.1	45.28	0	no RNA 1
HspB8:133:x:HspB8:142	HEEKQQEGGIVSKNFTK-K4-K13	HspB8	-	looplink	133	142	0.33	35.41	0	no RNA 1
HspB8:142:x:HspB8:147	QQEGGIVSKNFTKK-K9-K14	HspB8	-	looplink	142	147	0.51	28.66	0	no RNA 1
FUS:269:x:HspB8:120	TKDGYVEVSGK-GGFNKFGGPR-a2-b5	HspB8	FUS	inter-protein xl	120	269	0	48.19	0	no RNA 1
FUS:269:x:HspB8:129	DGYVEVSGKHEEK-GGFNKFGGPR-a9-b5	HspB8	FUS	inter-protein xl	129	269	0	26.8	0	no RNA 1
FUS:317:x:HspB8:120	TKDGYVEVSGK-QIGIIKTNK-a2-b6	HspB8	FUS	inter-protein xl	120	317	0.79	30.75	0	no RNA 1
FUS:321:x:HspB8:120	KTGQPMINLYTDR-TKDGYVEVSGK-a1-b2	FUS	HspB8	inter-protein xl	321	120	0	41.11	0	no RNA 1
FUS:321:x:HspB8:129	DGYVEVSGKHEEK-KTGQPMINLYTDR-a9-b1	HspB8	FUS	inter-protein xl	129	321	0	35.5	0	no RNA 1
FUS:337:x:HspB8:111	VCVNVHSFKPEELMVK-ETGKLK-a9-b4	HspB8	FUS	inter-protein xl	111	337	0.44	29.86	0	no RNA 1
FUS:337:x:HspB8:120	TKDGYVEVSGK-ETGKLK-a2-b4	HspB8	FUS	inter-protein xl	120	337	0	26.72	0	no RNA 1
FUS:337:x:HspB8:129	DGYVEVSGKHEEK-ETGKLK-a9-b4	HspB8	FUS	inter-protein xl	129	337	0.28	30.48	0	no RNA 1
FUS:337:x:HspB8:133	HEEKQQEGGIVSK-ETGKLK-a4-b4	HspB8	FUS	inter-protein xl	133	337	0.43	30.71	0	no RNA 1
FUS:339:x:HspB8:111	LKGEATVSFDDPPSAK-VCVNVHSFKPEELMVK-a2-b9	FUS	HspB8	inter-protein xl	339	111	0.35	30.08	0	no RNA 1
FUS:339:x:HspB8:120	LKGEATVSFDDPPSAK-TKDGYVEVSGK-a2-b2	FUS	HspB8	inter-protein xl	339	120	0.79	38.32	0	no RNA 1
FUS:339:x:HspB8:133	LKGEATVSFDDPPSAK-HEEKQQEGGIVSK-a2-b4	FUS	HspB8	inter-protein xl	339	133	0.93	25.91	0.034	no RNA 1
FUS:362:x:HspB8:120	AAIDWFDGKEFSGNPIK-TKDGYVEVSGK-a9-b2	FUS	HspB8	inter-protein xl	362	120	0.76	39.31	0	no RNA 1
FUS:362:x:HspB8:129	AAIDWFDGKEFSGNPIK-DGYVEVSGKHEEK-a9-b9	FUS	HspB8	inter-protein xl	362	129	0.37	45.67	0	no RNA 1
FUS:370:x:HspB8:118	VCVNVHSFKPEELMVKTK-EFSGNPIKVSFATR-a16-b8	HspB8	FUS	inter-protein xl	118	370	0.93	27.52	0	no RNA 1
FUS:370:x:HspB8:120	EFSGNPIKVSFATR-TKDGYVEVSGK-a8-b2	FUS	HspB8	inter-protein xl	370	120	0.9	35.83	0	no RNA 1
FUS:370:x:HspB8:129	EFSGNPIKVSFATR-DGYVEVSGKHEEK-a8-b9	FUS	HspB8	inter-protein xl	370	129	0.85	32.38	0	no RNA 1
FUS:370:x:HspB8:133	EFSGNPIKVSFATR-HEEKQQEGGIVSK-a8-b4	FUS	HspB8	inter-protein xl	370	133	0.86	37.32	0	no RNA 1
FUS:432:x:HspB8:120	AGDWKCPNPTCENMNFSWR-TKDGYVEVSGK-a5-b2	FUS	HspB8	inter-protein xl	432	120	0	33.64	0	no RNA 1
FUS:456:x:HspB8:111	APKPDGPGGGPGGSHMGGNYGDDR-VCVNVHSFKPEELMVK-a3-b9	FUS	HspB8	inter-protein xl	456	111	0	26.36	0	no RNA 1
FUS:456:x:HspB8:120	APKPDGPGGGPGGSHMGGNYGDDR-TKDGYVEVSGK-a3-b2	FUS	HspB8	inter-protein xl	456	120	0	35.06	0	no RNA 1
FUS:456:x:HspB8:129	APKPDGPGGGPGGSHMGGNYGDDR-DGYVEVSGKHEEK-a3-b9	FUS	HspB8	inter-protein xl	456	129	0	36.14	0	no RNA 1
FUS:515:x:HspB8:102	TPPPFPGEPWKVCVNVHSFKPEELMVK-GGFGPGKMDSR-a11-b7	HspB8	FUS	inter-protein xl	102	515	0	31.5	0	no RNA 1
FUS:515:x:HspB8:111	VCVNVHSFKPEELMVK-GGFGPGKMDSR-a9-b7	HspB8	FUS	inter-protein xl	111	515	0.69	39.12	0	no RNA 1
FUS:515:x:HspB8:120	GGFGPGKMDSR-TKDGYVEVSGK-a7-b2	FUS	HspB8	inter-protein xl	515	120	0.51	30.95	0	no RNA 1
FUS:515:x:HspB8:129	DGYVEVSGKHEEK-GGFGPGKMDSR-a9-b7	HspB8	FUS	inter-protein xl	129	515	0	40.56	0	no RNA 1
FUS:515:x:HspB8:133	HEEKQQEGGIVSK-GGFGPGKMDSR-a4-b7	HspB8	FUS	inter-protein xl	133	515	0.38	33.95	0	no RNA 1
FUS:311	HDSEQDNSDNNTIFVQGLGENVTIESVADYFKQIGIIK-K32-155	FUS	-	monolink	311	n/a	0.05	43.78	0	no RNA 2
FUS:321	KTGQPMINLYTDRETGK-K1-156	FUS	-	monolink	321	n/a	0.12	28.56	0	no RNA 2
FUS:337	TGQPMINLYTDRETGKLK-K16-156	FUS	-	monolink	337	n/a	0	27.71	0	no RNA 2
FUS:339	LKGEATVSFDDPPSAK-K2-156	FUS	-	monolink	339	n/a	0.13	45.73	0	no RNA 2
FUS:353	LKGEATVSFDDPPSAKAAIDWFDGK-K16-156	FUS	-	monolink	353	n/a	0	38.17	0	no RNA 2
FUS:362	AAIDWFDGKEFSGNPIK-K9-155	FUS	-	monolink	362	n/a	0.13	54.81	0	no RNA 2
FUS:370	EFSGNPIKVSFATR-K8-156	FUS	-	monolink	370	n/a	0	49.1	0	no RNA 2
FUS:432	AGDWKCPNPTCENMNFSWR-K5-155	FUS	-	monolink	432	n/a	0	42.01	0	no RNA 2
FUS:453	NECNQCKAPKPDGPGGGPGGSHMGGNYGDDR-K7-156	FUS	-	monolink	453	n/a	0	37.91	0	no RNA 2
FUS:456	APKPDGPGGGPGGSHMGGNYGDDR-K3-155	FUS	-	monolink	456	n/a	0	38.18	0	no RNA 2
HspB8:102	TPPPFPGEPWKVCVNVHSFKPEELMVK-K11-155	HspB8	-	monolink	102	n/a	0	29.16	0	no RNA 2
HspB8:111	VCVNVHSFKPEELMVK-K9-156	HspB8	-	monolink	111	n/a	0.18	39.26	0	no RNA 2
HspB8:118	VCVNVHSFKPEELMVKTK-K16-155	HspB8	-	monolink	118	n/a	0.4	42.06	0	no RNA 2
HspB8:120	TKDGYVEVSGKHEEK-K2-156	HspB8	-	monolink	120	n/a	0.15	32.34	0	no RNA 2
HspB8:129	DGYVEVSGKHEEKQQEGGIVSK-K9-155	HspB8	-	monolink	129	n/a	0.1	40.58	0	no RNA 2
HspB8:133	DGYVEVSGKHEEKQQEGGIVSK-K13-156	HspB8	-	monolink	133	n/a	0.1	46.49	0	no RNA 2
HspB8:142	QQEGGIVSKNFTKK-K9-156	HspB8	-	monolink	142	n/a	0.28	32.96	0	no RNA 2
FUS:269:x:FUS:317	GGFNKFGGPR-QIGIIKTNK-a5-b6	FUS	FUS	intra-protein xl	269	317	0.67	26.15	0	no RNA 2
FUS:269:x:FUS:321	KTGQPMINLYTDR-GGFNKFGGPR-a1-b5	FUS	FUS	intra-protein xl	321	269	0	38.71	0	no RNA 2
FUS:269:x:FUS:337	GGFNKFGGPR-ETGKLK-a5-b4	FUS	FUS	intra-protein xl	269	337	0	34.34	0	no RNA 2
FUS:269:x:FUS:339	LKGEATVSFDDPPSAK-GGFNKFGGPR-a2-b5	FUS	FUS	intra-protein xl	339	269	0.36	40.97	0	no RNA 2
FUS:269:x:FUS:362	AAIDWFDGKEFSGNPIK-GGFNKFGGPR-a9-b5	FUS	FUS	intra-protein xl	362	269	0.25	34.72	0	no RNA 2
FUS:269:x:FUS:370	EFSGNPIKVSFATR-GGFNKFGGPR-a8-b5	FUS	FUS	intra-protein xl	370	269	0	35.26	0	no RNA 2
FUS:269:x:FUS:432	AGDWKCPNPTCENMNFSWR-GGFNKFGGPR-a5-b5	FUS	FUS	intra-protein xl	432	269	0	39.68	0	no RNA 2
FUS:269:x:FUS:456	APKPDGPGGGPGGSHMGGNYGDDR-GGFNKFGGPR-a3-b5	FUS	FUS	intra-protein xl	456	269	0	39.44	0	no RNA 2
FUS:269:x:FUS:515	GGFGPGKMDSR-GGFNKFGGPR-a7-b5	FUS	FUS	intra-protein xl	515	269	0.66	42.41	0	no RNA 2
FUS:311:x:FUS:321	HDSEQDNSDNNTIFVQGLGENVTIESVADYFKQIGIIK-KTGQPMINLYTDR-a32-b1	FUS	FUS	intra-protein xl	311	321	0	26.1	0	no RNA 2
FUS:317:x:FUS:321	KTGQPMINLYTDR-QIGIIKTNK-a1-b6	FUS	FUS	intra-protein xl	321	317	0	34.76	0	no RNA 2
FUS:317:x:FUS:337	QIGIIKTNK-ETGKLK-a6-b4	FUS	FUS	intra-protein xl	317	337	0.55	31.33	0	no RNA 2
FUS:317:x:FUS:339	LKGEATVSFDDPPSAK-QIGIIKTNK-a2-b6	FUS	FUS	intra-protein xl	339	317	0.86	30.35	0	no RNA 2
FUS:317:x:FUS:362	AAIDWFDGKEFSGNPIK-QIGIIKTNK-a9-b6	FUS	FUS	intra-protein xl	362	317	0.87	33.91	0	no RNA 2
FUS:317:x:FUS:515	GGFGPGKMDSR-QIGIIKTNK-a7-b6	FUS	FUS	intra-protein xl	515	317	0.57	32.63	0	no RNA 2
FUS:321:x:FUS:337	KTGQPMINLYTDR-ETGKLK-a1-b4	FUS	FUS	intra-protein xl	321	337	0	33.84	0	no RNA 2
FUS:321:x:FUS:339	LKGEATVSFDDPPSAK-KTGQPMINLYTDR-a2-b1	FUS	FUS	intra-protein xl	339	321	0.6	38.63	0	no RNA 2
FUS:321:x:FUS:362	AAIDWFDGKEFSGNPIK-KTGQPMINLYTDR-a9-b1	FUS	FUS	intra-protein xl	362	321	0.64	36.81	0	no RNA 2
FUS:321:x:FUS:370	EFSGNPIKVSFATR-KTGQPMINLYTDR-a8-b1	FUS	FUS	intra-protein xl	370	321	0	35.05	0	no RNA 2
FUS:321:x:FUS:432	AGDWKCPNPTCENMNFSWR-KTGQPMINLYTDR-a5-b1	FUS	FUS	intra-protein xl	432	321	0.61	30.94	0	no RNA 2
FUS:321:x:FUS:456	APKPDGPGGGPGGSHMGGNYGDDR-KTGQPMINLYTDR-a3-b1	FUS	FUS	intra-protein xl	456	321	0	29.81	0	no RNA 2
FUS:321:x:FUS:515	KTGQPMINLYTDR-GGFGPGKMDSR-a1-b7	FUS	FUS	intra-protein xl	321	515	0	30.1	0	no RNA 2
FUS:337:x:FUS:339	LKGEATVSFDDPPSAK-ETGKLK-a2-b4	FUS	FUS	intra-protein xl	339	337	0.19	33.73	0	no RNA 2
FUS:337:x:FUS:362	AAIDWFDGKEFSGNPIK-ETGKLK-a9-b4	FUS	FUS	intra-protein xl	362	337	0.42	28.05	0	no RNA 2
FUS:337:x:FUS:370	EFSGNPIKVSFATR-ETGKLK-a8-b4	FUS	FUS	intra-protein xl	370	337	0.39	26.73	0	no RNA 2
FUS:337:x:FUS:453	NECNQCKAPKPDGPGGGPGGSHMGGNYGDDR-ETGKLK-a7-b4	FUS	FUS	intra-protein xl	453	337	0.47	26.86	0	no RNA 2
FUS:337:x:FUS:456	APKPDGPGGGPGGSHMGGNYGDDR-ETGKLK-a3-b4	FUS	FUS	intra-protein xl	456	337	0.2	25.06	0	no RNA 2
FUS:337:x:FUS:515	GGFGPGKMDSR-ETGKLK-a7-b4	FUS	FUS	intra-protein xl	515	337	0.77	31.61	0	no RNA 2
FUS:339:x:FUS:362	AAIDWFDGKEFSGNPIK-LKGEATVSFDDPPSAK-a9-b2	FUS	FUS	intra-protein xl	362	339	0.54	46.16	0	no RNA 2
FUS:339:x:FUS:370	LKGEATVSFDDPPSAK-EFSGNPIKVSFATR-a2-b8	FUS	FUS	intra-protein xl	339	370	0.5	29.55	0	no RNA 2
FUS:339:x:FUS:432	AGDWKCPNPTCENMNFSWR-LKGEATVSFDDPPSAK-a5-b2	FUS	FUS	intra-protein xl	432	339	0.52	38	0	no RNA 2
FUS:339:x:FUS:456	APKPDGPGGGPGGSHMGGNYGDDR-LKGEATVSFDDPPSAK-a3-b2	FUS	FUS	intra-protein xl	456	339	0	31.16	0	no RNA 2
FUS:339:x:FUS:515	LKGEATVSFDDPPSAK-GGFGPGKMDSR-a2-b7	FUS	FUS	intra-protein xl	339	515	0.33	40.03	0	no RNA 2
FUS:353:x:FUS:370	GEATVSFDDPPSAKAAIDWFDGK-EFSGNPIKVSFATR-a14-b8	FUS	FUS	intra-protein xl	353	370	0.49	25.53	0	no RNA 2
FUS:362:x:FUS:362	AAIDWFDGKEFSGNPIK-AAIDWFDGKEFSGNPIK-a9-b9	FUS	FUS	intra-protein xl	362	362	0	44.05	0	no RNA 2
FUS:362:x:FUS:370	AAIDWFDGKEFSGNPIK-EFSGNPIKVSFATR-a9-b8	FUS	FUS	intra-protein xl	362	370	0.66	34.69	0	no RNA 2
FUS:362:x:FUS:432	AGDWKCPNPTCENMNFSWR-AAIDWFDGKEFSGNPIK-a5-b9	FUS	FUS	intra-protein xl	432	362	0	44.26	0	no RNA 2
FUS:362:x:FUS:515	AAIDWFDGKEFSGNPIK-GGFGPGKMDSR-a9-b7	FUS	FUS	intra-protein xl	362	515	0.49	50.09	0	no RNA 2
FUS:370:x:FUS:370	EFSGNPIKVSFATR-EFSGNPIKVSFATR-a8-b8	FUS	FUS	intra-protein xl	370	370	0	31.57	0	no RNA 2
FUS:370:x:FUS:432	AGDWKCPNPTCENMNFSWR-EFSGNPIKVSFATR-a5-b8	FUS	FUS	intra-protein xl	432	370	0	36.96	0	no RNA 2
FUS:370:x:FUS:456	APKPDGPGGGPGGSHMGGNYGDDR-EFSGNPIKVSFATR-a3-b8	FUS	FUS	intra-protein xl	456	370	0.23	35.95	0	no RNA 2
FUS:370:x:FUS:515	EFSGNPIKVSFATR-GGFGPGKMDSR-a8-b7	FUS	FUS	intra-protein xl	370	515	0	36.35	0	no RNA 2
FUS:432:x:FUS:456	APKPDGPGGGPGGSHMGGNYGDDR-AGDWKCPNPTCENMNFSWR-a3-b5	FUS	FUS	intra-protein xl	456	432	0	38.1	0	no RNA 2
FUS:432:x:FUS:515	AGDWKCPNPTCENMNFSWR-GGFGPGKMDSR-a5-b7	FUS	FUS	intra-protein xl	432	515	0	42.57	0	no RNA 2
FUS:453:x:FUS:515	NECNQCKAPKPDGPGGGPGGSHMGGNYGDDR-GGFGPGKMDSR-a7-b7	FUS	FUS	intra-protein xl	453	515	0.67	37.95	0	no RNA 2
FUS:456:x:FUS:515	APKPDGPGGGPGGSHMGGNYGDDR-GGFGPGKMDSR-a3-b7	FUS	FUS	intra-protein xl	456	515	0	33.43	0	no RNA 2
FUS:515:x:FUS:515	GGFGPGKMDSR-GGFGPGKMDSR-a7-b7	FUS	FUS	intra-protein xl	515	515	0.81	27.95	0	no RNA 2
HspB8:111:x:HspB8:120	VCVNVHSFKPEELMVK-TKDGYVEVSGK-a9-b2	HspB8	HspB8	intra-protein xl	111	120	0.66	44.8	0	no RNA 2
HspB8:111:x:HspB8:129	VCVNVHSFKPEELMVK-DGYVEVSGKHEEK-a9-b9	HspB8	HspB8	intra-protein xl	111	129	0.67	40.07	0	no RNA 2
HspB8:111:x:HspB8:133	VCVNVHSFKPEELMVK-HEEKQQEGGIVSK-a9-b4	HspB8	HspB8	intra-protein xl	111	133	0.76	38.67	0	no RNA 2
HspB8:118:x:HspB8:129	VCVNVHSFKPEELMVKTK-DGYVEVSGKHEEK-a16-b9	HspB8	HspB8	intra-protein xl	118	129	0.5	40.1	0	no RNA 2
HspB8:120:x:HspB8:120	TKDGYVEVSGK-TKDGYVEVSGK-a2-b2	HspB8	HspB8	intra-protein xl	120	120	0.73	32.44	0	no RNA 2
HspB8:120:x:HspB8:129	DGYVEVSGKHEEK-TKDGYVEVSGK-a9-b2	HspB8	HspB8	intra-protein xl	129	120	0.52	43.11	0	no RNA 2
HspB8:120:x:HspB8:133	HEEKQQEGGIVSK-TKDGYVEVSGK-a4-b2	HspB8	HspB8	intra-protein xl	133	120	0.63	48.16	0	no RNA 2
HspB8:129:x:HspB8:129	DGYVEVSGKHEEK-DGYVEVSGKHEEK-a9-b9	HspB8	HspB8	intra-protein xl	129	129	0	37.91	0	no RNA 2
FUS:311:x:FUS:317	HDSEQDNSDNNTIFVQGLGENVTIESVADYFKQIGIIKTNK-K32-K38	FUS	-	looplink	311	317	0	36.89	0	no RNA 2
FUS:320:x:FUS:321	TNKKTGQPMINLYTDR-K3-K4	FUS	-	looplink	320	321	0	34.07	0	no RNA 2
FUS:337:x:FUS:339	ETGKLKGEATVSFDDPPSAK-K4-K6	FUS	-	looplink	337	339	0	42.92	0	no RNA 2
FUS:339:x:FUS:353	LKGEATVSFDDPPSAKAAIDWFDGK-K2-K16	FUS	-	looplink	339	353	0.12	25.13	0	no RNA 2
FUS:353:x:FUS:362	GEATVSFDDPPSAKAAIDWFDGKEFSGNPIK-K14-K23	FUS	-	looplink	353	362	0	29.69	0	no RNA 2
FUS:362:x:FUS:370	AAIDWFDGKEFSGNPIKVSFATR-K9-K17	FUS	-	looplink	362	370	0	37.36	0	no RNA 2
FUS:453:x:FUS:456	NECNQCKAPKPDGPGGGPGGSHMGGNYGDDR-K7-K10	FUS	-	looplink	453	456	0	32.6	0	no RNA 2
HspB8:102:x:HspB8:111	TPPPFPGEPWKVCVNVHSFKPEELMVK-K11-K20	HspB8	-	looplink	102	111	0	25.36	0	no RNA 2
HspB8:111:x:HspB8:118	VCVNVHSFKPEELMVKTK-K9-K16	HspB8	-	looplink	111	118	0.4	31.23	0	no RNA 2
HspB8:111:x:HspB8:120	VCVNVHSFKPEELMVKTKDGYVEVSGK-K9-K18	HspB8	-	looplink	111	120	0	36.86	0	no RNA 2
HspB8:118:x:HspB8:120	VCVNVHSFKPEELMVKTKDGYVEVSGK-K16-K18	HspB8	-	looplink	118	120	0	44.46	0	no RNA 2
HspB8:120:x:HspB8:129	TKDGYVEVSGKHEEK-K2-K11	HspB8	-	looplink	120	129	0.34	29.51	0	no RNA 2
HspB8:129:x:HspB8:133	DGYVEVSGKHEEKQQEGGIVSK-K9-K13	HspB8	-	looplink	129	133	0.1	47.36	0	no RNA 2
HspB8:129:x:HspB8:142	DGYVEVSGKHEEKQQEGGIVSK-K9-K22	HspB8	-	looplink	129	142	0.16	28.76	0	no RNA 2
HspB8:133:x:HspB8:142	HEEKQQEGGIVSKNFTK-K4-K13	HspB8	-	looplink	133	142	0.28	31.92	0	no RNA 2
HspB8:142:x:HspB8:146	QQEGGIVSKNFTKK-K9-K13	HspB8	-	looplink	142	146	0.41	35.49	0	no RNA 2
HspB8:142:x:HspB8:147	QQEGGIVSKNFTKK-K9-K14	HspB8	-	looplink	142	147	0.42	29.53	0	no RNA 2
FUS:269:x:HspB8:129	DGYVEVSGKHEEK-GGFNKFGGPR-a9-b5	HspB8	FUS	inter-protein xl	129	269	0.4	39.65	0	no RNA 2
FUS:317:x:HspB8:120	TKDGYVEVSGK-QIGIIKTNK-a2-b6	HspB8	FUS	inter-protein xl	120	317	0	30.83	0	no RNA 2
FUS:321:x:HspB8:120	KTGQPMINLYTDR-TKDGYVEVSGK-a1-b2	FUS	HspB8	inter-protein xl	321	120	0	37.19	0	no RNA 2
FUS:321:x:HspB8:129	DGYVEVSGKHEEK-KTGQPMINLYTDR-a9-b1	HspB8	FUS	inter-protein xl	129	321	0	37.59	0	no RNA 2
FUS:337:x:HspB8:111	VCVNVHSFKPEELMVK-ETGKLK-a9-b4	HspB8	FUS	inter-protein xl	111	337	0.7	25.96	0.062	no RNA 2
FUS:337:x:HspB8:118	VCVNVHSFKPEELMVKTK-ETGKLK-a16-b4	HspB8	FUS	inter-protein xl	118	337	0.63	28.81	0	no RNA 2
FUS:337:x:HspB8:120	TKDGYVEVSGK-ETGKLK-a2-b4	HspB8	FUS	inter-protein xl	120	337	0	32.9	0	no RNA 2
FUS:337:x:HspB8:133	HEEKQQEGGIVSK-ETGKLK-a4-b4	HspB8	FUS	inter-protein xl	133	337	0.44	31.5	0	no RNA 2
FUS:339:x:HspB8:111	LKGEATVSFDDPPSAK-VCVNVHSFKPEELMVK-a2-b9	FUS	HspB8	inter-protein xl	339	111	0	32.23	0	no RNA 2
FUS:339:x:HspB8:120	LKGEATVSFDDPPSAK-TKDGYVEVSGK-a2-b2	FUS	HspB8	inter-protein xl	339	120	0	39.92	0	no RNA 2
FUS:339:x:HspB8:133	LKGEATVSFDDPPSAK-HEEKQQEGGIVSK-a2-b4	FUS	HspB8	inter-protein xl	339	133	0.16	28.33	0.037	no RNA 2
FUS:362:x:HspB8:118	VCVNVHSFKPEELMVKTK-AAIDWFDGKEFSGNPIK-a16-b9	HspB8	FUS	inter-protein xl	118	362	0.36	28.11	0.037	no RNA 2
FUS:362:x:HspB8:120	AAIDWFDGKEFSGNPIK-TKDGYVEVSGK-a9-b2	FUS	HspB8	inter-protein xl	362	120	0.78	43.62	0	no RNA 2
FUS:362:x:HspB8:129	AAIDWFDGKEFSGNPIK-DGYVEVSGKHEEK-a9-b9	FUS	HspB8	inter-protein xl	362	129	0	38.22	0	no RNA 2
FUS:370:x:HspB8:118	VCVNVHSFKPEELMVKTK-EFSGNPIKVSFATR-a16-b8	HspB8	FUS	inter-protein xl	118	370	0.8	35.49	0	no RNA 2
FUS:370:x:HspB8:120	EFSGNPIKVSFATR-TKDGYVEVSGK-a8-b2	FUS	HspB8	inter-protein xl	370	120	0.82	36.77	0	no RNA 2
FUS:370:x:HspB8:129	EFSGNPIKVSFATR-DGYVEVSGKHEEK-a8-b9	FUS	HspB8	inter-protein xl	370	129	0.88	30.43	0	no RNA 2
FUS:370:x:HspB8:133	EFSGNPIKVSFATR-HEEKQQEGGIVSK-a8-b4	FUS	HspB8	inter-protein xl	370	133	0.87	28.8	0	no RNA 2
FUS:432:x:HspB8:120	AGDWKCPNPTCENMNFSWR-TKDGYVEVSGK-a5-b2	FUS	HspB8	inter-protein xl	432	120	0	34.59	0	no RNA 2
FUS:456:x:HspB8:120	APKPDGPGGGPGGSHMGGNYGDDR-TKDGYVEVSGK-a3-b2	FUS	HspB8	inter-protein xl	456	120	0.6	37.58	0	no RNA 2
FUS:515:x:HspB8:102	TPPPFPGEPWKVCVNVHSFKPEELMVK-GGFGPGKMDSR-a11-b7	HspB8	FUS	inter-protein xl	102	515	0	28.7	0	no RNA 2
FUS:515:x:HspB8:111	VCVNVHSFKPEELMVK-GGFGPGKMDSR-a9-b7	HspB8	FUS	inter-protein xl	111	515	0.7	38.27	0	no RNA 2
FUS:515:x:HspB8:118	VCVNVHSFKPEELMVKTK-GGFGPGKMDSR-a16-b7	HspB8	FUS	inter-protein xl	118	515	0.67	32.82	0	no RNA 2
FUS:515:x:HspB8:120	GGFGPGKMDSR-TKDGYVEVSGK-a7-b2	FUS	HspB8	inter-protein xl	515	120	0.65	36.18	0	no RNA 2
FUS:515:x:HspB8:129	DGYVEVSGKHEEK-GGFGPGKMDSR-a9-b7	HspB8	FUS	inter-protein xl	129	515	0	37.85	0	no RNA 2
FUS:515:x:HspB8:133	HEEKQQEGGIVSK-GGFGPGKMDSR-a4-b7	HspB8	FUS	inter-protein xl	133	515	0.79	36.19	0	no RNA 2
FUS:311	HDSEQDNSDNNTIFVQGLGENVTIESVADYFKQIGIIK-K32-155	FUS	-	monolink	311	n/a	0	50.84	0	no RNA 3
FUS:317	QIGIIKTNKK-K6-156	FUS	-	monolink	317	n/a	0.8	25.49	0	no RNA 3
FUS:321	KTGQPMINLYTDR-K1-155	FUS	-	monolink	321	n/a	0	41.21	0	no RNA 3
FUS:339	LKGEATVSFDDPPSAK-K2-156	FUS	-	monolink	339	n/a	0.27	47.71	0	no RNA 3
FUS:353	LKGEATVSFDDPPSAKAAIDWFDGK-K16-155	FUS	-	monolink	353	n/a	0.08	39.14	0	no RNA 3
FUS:362	AAIDWFDGKEFSGNPIK-K9-155	FUS	-	monolink	362	n/a	0	49.49	0	no RNA 3
FUS:370	EFSGNPIKVSFATR-K8-155	FUS	-	monolink	370	n/a	0	47.67	0	no RNA 3
FUS:432	AGDWKCPNPTCENMNFSWR-K5-155	FUS	-	monolink	432	n/a	0.05	46.87	0	no RNA 3
FUS:453	NECNQCKAPKPDGPGGGPGGSHMGGNYGDDR-K7-155	FUS	-	monolink	453	n/a	0	38.3	0	no RNA 3
FUS:456	APKPDGPGGGPGGSHMGGNYGDDR-K3-156	FUS	-	monolink	456	n/a	0	36.11	0	no RNA 3
HspB8:102	TPPPFPGEPWKVCVNVHSFKPEELMVK-K11-155	HspB8	-	monolink	102	n/a	0	29.86	0	no RNA 3
HspB8:111	VCVNVHSFKPEELMVK-K9-155	HspB8	-	monolink	111	n/a	0.28	43.88	0	no RNA 3
HspB8:118	VCVNVHSFKPEELMVKTK-K16-156	HspB8	-	monolink	118	n/a	0.11	43.99	0	no RNA 3
HspB8:120	VCVNVHSFKPEELMVKTK-K18-155	HspB8	-	monolink	120	n/a	0.21	43.91	0	no RNA 3
HspB8:129	DGYVEVSGKHEEKQQEGGIVSK-K9-155	HspB8	-	monolink	129	n/a	0.19	40.04	0	no RNA 3
HspB8:133	DGYVEVSGKHEEKQQEGGIVSK-K13-155	HspB8	-	monolink	133	n/a	0.05	46.26	0	no RNA 3
HspB8:142	QQEGGIVSKNFTKK-K9-156	HspB8	-	monolink	142	n/a	0.18	36.1	0	no RNA 3
FUS:269:x:FUS:321	KTGQPMINLYTDR-GGFNKFGGPR-a1-b5	FUS	FUS	intra-protein xl	321	269	0	38.26	0	no RNA 3
FUS:269:x:FUS:337	GGFNKFGGPR-ETGKLK-a5-b4	FUS	FUS	intra-protein xl	269	337	0	35.52	0	no RNA 3
FUS:269:x:FUS:339	LKGEATVSFDDPPSAK-GGFNKFGGPR-a2-b5	FUS	FUS	intra-protein xl	339	269	0.37	45.3	0	no RNA 3
FUS:269:x:FUS:353	GEATVSFDDPPSAKAAIDWFDGK-GGFNKFGGPR-a14-b5	FUS	FUS	intra-protein xl	353	269	0.47	25.15	0.017	no RNA 3
FUS:269:x:FUS:362	AAIDWFDGKEFSGNPIK-GGFNKFGGPR-a9-b5	FUS	FUS	intra-protein xl	362	269	0.32	33.21	0	no RNA 3
FUS:269:x:FUS:370	EFSGNPIKVSFATR-GGFNKFGGPR-a8-b5	FUS	FUS	intra-protein xl	370	269	0	34.99	0	no RNA 3
FUS:269:x:FUS:432	AGDWKCPNPTCENMNFSWR-GGFNKFGGPR-a5-b5	FUS	FUS	intra-protein xl	432	269	0.24	37.86	0	no RNA 3
FUS:269:x:FUS:456	APKPDGPGGGPGGSHMGGNYGDDR-GGFNKFGGPR-a3-b5	FUS	FUS	intra-protein xl	456	269	0	34.84	0	no RNA 3
FUS:269:x:FUS:515	GGFGPGKMDSR-GGFNKFGGPR-a7-b5	FUS	FUS	intra-protein xl	515	269	0.63	41.11	0	no RNA 3
FUS:317:x:FUS:321	KTGQPMINLYTDR-QIGIIKTNK-a1-b6	FUS	FUS	intra-protein xl	321	317	0	33.71	0	no RNA 3
FUS:317:x:FUS:337	QIGIIKTNK-ETGKLK-a6-b4	FUS	FUS	intra-protein xl	317	337	0	28.76	0.017	no RNA 3
FUS:317:x:FUS:339	LKGEATVSFDDPPSAK-QIGIIKTNK-a2-b6	FUS	FUS	intra-protein xl	339	317	0.94	32.29	0	no RNA 3
FUS:317:x:FUS:362	AAIDWFDGKEFSGNPIK-QIGIIKTNK-a9-b6	FUS	FUS	intra-protein xl	362	317	0.32	26.67	0.017	no RNA 3
FUS:317:x:FUS:370	EFSGNPIKVSFATR-QIGIIKTNK-a8-b6	FUS	FUS	intra-protein xl	370	317	0.78	29.03	0.017	no RNA 3
FUS:321:x:FUS:337	KTGQPMINLYTDR-ETGKLK-a1-b4	FUS	FUS	intra-protein xl	321	337	0	33	0	no RNA 3
FUS:321:x:FUS:339	LKGEATVSFDDPPSAK-KTGQPMINLYTDR-a2-b1	FUS	FUS	intra-protein xl	339	321	0.56	37.55	0	no RNA 3
FUS:321:x:FUS:362	AAIDWFDGKEFSGNPIK-KTGQPMINLYTDR-a9-b1	FUS	FUS	intra-protein xl	362	321	0	28.77	0.017	no RNA 3
FUS:321:x:FUS:370	EFSGNPIKVSFATR-KTGQPMINLYTDR-a8-b1	FUS	FUS	intra-protein xl	370	321	0	34.09	0	no RNA 3
FUS:321:x:FUS:456	APKPDGPGGGPGGSHMGGNYGDDR-KTGQPMINLYTDR-a3-b1	FUS	FUS	intra-protein xl	456	321	0	31.82	0	no RNA 3
FUS:321:x:FUS:515	KTGQPMINLYTDR-GGFGPGKMDSR-a1-b7	FUS	FUS	intra-protein xl	321	515	0	39.47	0	no RNA 3
FUS:337:x:FUS:339	LKGEATVSFDDPPSAK-ETGKLK-a2-b4	FUS	FUS	intra-protein xl	339	337	0.34	30.76	0	no RNA 3
FUS:337:x:FUS:362	AAIDWFDGKEFSGNPIK-ETGKLK-a9-b4	FUS	FUS	intra-protein xl	362	337	0.26	29.8	0.017	no RNA 3
FUS:337:x:FUS:370	EFSGNPIKVSFATR-ETGKLK-a8-b4	FUS	FUS	intra-protein xl	370	337	0.24	31.25	0	no RNA 3
FUS:337:x:FUS:432	AGDWKCPNPTCENMNFSWR-ETGKLK-a5-b4	FUS	FUS	intra-protein xl	432	337	0	36.39	0	no RNA 3
FUS:337:x:FUS:515	GGFGPGKMDSR-ETGKLK-a7-b4	FUS	FUS	intra-protein xl	515	337	0.71	27.42	0.017	no RNA 3
FUS:339:x:FUS:362	AAIDWFDGKEFSGNPIK-LKGEATVSFDDPPSAK-a9-b2	FUS	FUS	intra-protein xl	362	339	0	43.7	0	no RNA 3
FUS:339:x:FUS:370	LKGEATVSFDDPPSAK-EFSGNPIKVSFATR-a2-b8	FUS	FUS	intra-protein xl	339	370	0.45	31.23	0	no RNA 3
FUS:339:x:FUS:432	AGDWKCPNPTCENMNFSWR-LKGEATVSFDDPPSAK-a5-b2	FUS	FUS	intra-protein xl	432	339	0.53	30.32	0	no RNA 3
FUS:339:x:FUS:456	APKPDGPGGGPGGSHMGGNYGDDR-LKGEATVSFDDPPSAK-a3-b2	FUS	FUS	intra-protein xl	456	339	0	31.47	0	no RNA 3
FUS:339:x:FUS:515	LKGEATVSFDDPPSAK-GGFGPGKMDSR-a2-b7	FUS	FUS	intra-protein xl	339	515	0.41	41.23	0	no RNA 3
FUS:362:x:FUS:362	AAIDWFDGKEFSGNPIK-AAIDWFDGKEFSGNPIK-a9-b9	FUS	FUS	intra-protein xl	362	362	0.72	43.48	0	no RNA 3
FUS:362:x:FUS:370	AAIDWFDGKEFSGNPIK-EFSGNPIKVSFATR-a9-b8	FUS	FUS	intra-protein xl	362	370	0.55	33.82	0	no RNA 3
FUS:362:x:FUS:432	AGDWKCPNPTCENMNFSWR-AAIDWFDGKEFSGNPIK-a5-b9	FUS	FUS	intra-protein xl	432	362	0	44.73	0	no RNA 3
FUS:362:x:FUS:515	AAIDWFDGKEFSGNPIK-GGFGPGKMDSR-a9-b7	FUS	FUS	intra-protein xl	362	515	0.51	49.07	0	no RNA 3
FUS:370:x:FUS:370	EFSGNPIKVSFATR-EFSGNPIKVSFATR-a8-b8	FUS	FUS	intra-protein xl	370	370	0	28.22	0.017	no RNA 3
FUS:370:x:FUS:432	AGDWKCPNPTCENMNFSWR-EFSGNPIKVSFATR-a5-b8	FUS	FUS	intra-protein xl	432	370	0	37.4	0	no RNA 3
FUS:370:x:FUS:453	NECNQCKAPKPDGPGGGPGGSHMGGNYGDDR-EFSGNPIKVSFATR-a7-b8	FUS	FUS	intra-protein xl	453	370	0.7	31.78	0	no RNA 3
FUS:370:x:FUS:515	EFSGNPIKVSFATR-GGFGPGKMDSR-a8-b7	FUS	FUS	intra-protein xl	370	515	0	34.09	0	no RNA 3
FUS:432:x:FUS:453	NECNQCKAPKPDGPGGGPGGSHMGGNYGDDR-AGDWKCPNPTCENMNFSWR-a7-b5	FUS	FUS	intra-protein xl	453	432	0.72	38.12	0	no RNA 3
FUS:432:x:FUS:456	APKPDGPGGGPGGSHMGGNYGDDR-AGDWKCPNPTCENMNFSWR-a3-b5	FUS	FUS	intra-protein xl	456	432	0	33.2	0	no RNA 3
FUS:432:x:FUS:515	AGDWKCPNPTCENMNFSWR-GGFGPGKMDSR-a5-b7	FUS	FUS	intra-protein xl	432	515	0	46.19	0	no RNA 3
FUS:453:x:FUS:515	NECNQCKAPKPDGPGGGPGGSHMGGNYGDDR-GGFGPGKMDSR-a7-b7	FUS	FUS	intra-protein xl	453	515	0.69	37.35	0	no RNA 3
FUS:456:x:FUS:515	APKPDGPGGGPGGSHMGGNYGDDR-GGFGPGKMDSR-a3-b7	FUS	FUS	intra-protein xl	456	515	0.37	31.72	0	no RNA 3
FUS:515:x:FUS:515	GGFGPGKMDSR-GGFGPGKMDSR-a7-b7	FUS	FUS	intra-protein xl	515	515	0.75	37.25	0	no RNA 3
HspB8:111:x:HspB8:120	VCVNVHSFKPEELMVK-TKDGYVEVSGK-a9-b2	HspB8	HspB8	intra-protein xl	111	120	0.68	43.34	0	no RNA 3
HspB8:111:x:HspB8:129	VCVNVHSFKPEELMVK-DGYVEVSGKHEEK-a9-b9	HspB8	HspB8	intra-protein xl	111	129	0	39.86	0	no RNA 3
HspB8:118:x:HspB8:129	VCVNVHSFKPEELMVKTK-DGYVEVSGKHEEK-a16-b9	HspB8	HspB8	intra-protein xl	118	129	0.68	35.95	0	no RNA 3
HspB8:120:x:HspB8:120	TKDGYVEVSGK-TKDGYVEVSGK-a2-b2	HspB8	HspB8	intra-protein xl	120	120	0	29.53	0.017	no RNA 3
HspB8:120:x:HspB8:129	DGYVEVSGKHEEK-TKDGYVEVSGK-a9-b2	HspB8	HspB8	intra-protein xl	129	120	0.46	43.72	0	no RNA 3
HspB8:120:x:HspB8:133	HEEKQQEGGIVSK-TKDGYVEVSGK-a4-b2	HspB8	HspB8	intra-protein xl	133	120	0.54	39.67	0	no RNA 3
HspB8:129:x:HspB8:129	DGYVEVSGKHEEK-DGYVEVSGKHEEK-a9-b9	HspB8	HspB8	intra-protein xl	129	129	0.67	38.3	0	no RNA 3
HspB8:133:x:HspB8:133	HEEKQQEGGIVSK-HEEKQQEGGIVSK-a4-b4	HspB8	HspB8	intra-protein xl	133	133	0.82	43.12	0	no RNA 3
FUS:311:x:FUS:317	HDSEQDNSDNNTIFVQGLGENVTIESVADYFKQIGIIKTNK-K32-K38	FUS	-	looplink	311	317	0	29.23	0	no RNA 3
FUS:320:x:FUS:321	TNKKTGQPMINLYTDR-K3-K4	FUS	-	looplink	320	321	0	36.66	0	no RNA 3
FUS:337:x:FUS:339	ETGKLKGEATVSFDDPPSAK-K4-K6	FUS	-	looplink	337	339	0	41.5	0	no RNA 3
FUS:353:x:FUS:362	GEATVSFDDPPSAKAAIDWFDGKEFSGNPIK-K14-K23	FUS	-	looplink	353	362	0.1	33.82	0	no RNA 3
FUS:362:x:FUS:370	AAIDWFDGKEFSGNPIK-K9-K17	FUS	-	looplink	362	370	0.13	35	0	no RNA 3
FUS:453:x:FUS:456	NECNQCKAPKPDGPGGGPGGSHMGGNYGDDR-K7-K10	FUS	-	looplink	453	456	0	34.42	0	no RNA 3
HspB8:102:x:HspB8:111	TPPPFPGEPWKVCVNVHSFKPEELMVK-K11-K20	HspB8	-	looplink	102	111	0	27.55	0	no RNA 3
HspB8:111:x:HspB8:118	VCVNVHSFKPEELMVKTK-K9-K16	HspB8	-	looplink	111	118	0.41	35.36	0	no RNA 3
HspB8:111:x:HspB8:120	VCVNVHSFKPEELMVKTKDGYVEVSGK-K9-K18	HspB8	-	looplink	111	120	0	32.54	0	no RNA 3
HspB8:118:x:HspB8:120	VCVNVHSFKPEELMVKTKDGYVEVSGK-K16-K18	HspB8	-	looplink	118	120	0	43.52	0	no RNA 3
HspB8:129:x:HspB8:133	DGYVEVSGKHEEKQQEGGIVSK-K9-K13	HspB8	-	looplink	129	133	0.05	45.4	0	no RNA 3
HspB8:133:x:HspB8:142	HEEKQQEGGIVSKNFTK-K4-K13	HspB8	-	looplink	133	142	0.21	31.09	0	no RNA 3
HspB8:142:x:HspB8:146	QQEGGIVSKNFTKK-K9-K13	HspB8	-	looplink	142	146	0.43	33.82	0	no RNA 3
FUS:269:x:HspB8:129	DGYVEVSGKHEEK-GGFNKFGGPR-a9-b5	HspB8	FUS	inter-protein xl	129	269	0	33.88	0	no RNA 3
FUS:317:x:HspB8:120	TKDGYVEVSGK-QIGIIKTNK-a2-b6	HspB8	FUS	inter-protein xl	120	317	0.67	36.97	0	no RNA 3
FUS:321:x:HspB8:120	KTGQPMINLYTDR-TKDGYVEVSGK-a1-b2	FUS	HspB8	inter-protein xl	321	120	0	38.54	0	no RNA 3
FUS:321:x:HspB8:129	DGYVEVSGKHEEK-KTGQPMINLYTDR-a9-b1	HspB8	FUS	inter-protein xl	129	321	0.85	33.87	0	no RNA 3
FUS:321:x:HspB8:133	HEEKQQEGGIVSK-KTGQPMINLYTDR-a4-b1	HspB8	FUS	inter-protein xl	133	321	0	25.03	0.048	no RNA 3
FUS:337:x:HspB8:111	VCVNVHSFKPEELMVK-ETGKLK-a9-b4	HspB8	FUS	inter-protein xl	111	337	0.59	28.83	0	no RNA 3
FUS:337:x:HspB8:120	TKDGYVEVSGK-ETGKLK-a2-b4	HspB8	FUS	inter-protein xl	120	337	0.32	33.19	0	no RNA 3
FUS:337:x:HspB8:129	DGYVEVSGKHEEK-ETGKLK-a9-b4	HspB8	FUS	inter-protein xl	129	337	0.75	31.41	0	no RNA 3
FUS:337:x:HspB8:133	HEEKQQEGGIVSK-ETGKLK-a4-b4	HspB8	FUS	inter-protein xl	133	337	0.55	32.22	0	no RNA 3
FUS:339:x:HspB8:111	LKGEATVSFDDPPSAK-VCVNVHSFKPEELMVK-a2-b9	FUS	HspB8	inter-protein xl	339	111	0.86	27.83	0.037	no RNA 3
FUS:339:x:HspB8:120	LKGEATVSFDDPPSAK-TKDGYVEVSGK-a2-b2	FUS	HspB8	inter-protein xl	339	120	0.88	34.54	0	no RNA 3
FUS:339:x:HspB8:133	LKGEATVSFDDPPSAK-HEEKQQEGGIVSK-a2-b4	FUS	HspB8	inter-protein xl	339	133	0.27	29.47	0	no RNA 3
FUS:362:x:HspB8:120	AAIDWFDGKEFSGNPIK-TKDGYVEVSGK-a9-b2	FUS	HspB8	inter-protein xl	362	120	0.71	42.24	0	no RNA 3
FUS:362:x:HspB8:129	AAIDWFDGKEFSGNPIK-DGYVEVSGKHEEK-a9-b9	FUS	HspB8	inter-protein xl	362	129	0.24	41.73	0	no RNA 3
FUS:370:x:HspB8:111	VCVNVHSFKPEELMVKTK-EFSGNPIKVSFATR-a9-b8	HspB8	FUS	inter-protein xl	111	370	0.93	28.22	0.037	no RNA 3
FUS:370:x:HspB8:118	VCVNVHSFKPEELMVKTK-EFSGNPIKVSFATR-a16-b8	HspB8	FUS	inter-protein xl	118	370	0	27.3	0.048	no RNA 3
FUS:370:x:HspB8:120	EFSGNPIKVSFATR-TKDGYVEVSGK-a8-b2	FUS	HspB8	inter-protein xl	370	120	0.75	32.37	0	no RNA 3
FUS:370:x:HspB8:129	EFSGNPIKVSFATR-DGYVEVSGKHEEK-a8-b9	FUS	HspB8	inter-protein xl	370	129	0.93	27.92	0.037	no RNA 3
FUS:370:x:HspB8:133	EFSGNPIKVSFATR-HEEKQQEGGIVSK-a8-b4	FUS	HspB8	inter-protein xl	370	133	0.73	41.04	0	no RNA 3
FUS:432:x:HspB8:120	AGDWKCPNPTCENMNFSWR-TKDGYVEVSGK-a5-b2	FUS	HspB8	inter-protein xl	432	120	0.75	42.94	0	no RNA 3
FUS:456:x:HspB8:120	APKPDGPGGGPGGSHMGGNYGDDR-TKDGYVEVSGK-a3-b2	FUS	HspB8	inter-protein xl	456	120	0	35.66	0	no RNA 3
FUS:515:x:HspB8:102	TPPPFPGEPWKVCVNVHSFKPEELMVK-GGFGPGKMDSR-a11-b7	HspB8	FUS	inter-protein xl	102	515	0	35.25	0	no RNA 3
FUS:515:x:HspB8:111	VCVNVHSFKPEELMVK-GGFGPGKMDSR-a9-b7	HspB8	FUS	inter-protein xl	111	515	0	37.91	0	no RNA 3
FUS:515:x:HspB8:118	VCVNVHSFKPEELMVKTK-GGFGPGKMDSR-a16-b7	HspB8	FUS	inter-protein xl	118	515	0.78	31.9	0	no RNA 3
FUS:515:x:HspB8:120	GGFGPGKMDSR-TKDGYVEVSGK-a7-b2	FUS	HspB8	inter-protein xl	515	120	0.57	35.06	0	no RNA 3
FUS:515:x:HspB8:129	DGYVEVSGKHEEK-GGFGPGKMDSR-a9-b7	HspB8	FUS	inter-protein xl	129	515	0.51	41.34	0	no RNA 3
FUS:515:x:HspB8:133	HEEKQQEGGIVSK-GGFGPGKMDSR-a4-b7	HspB8	FUS	inter-protein xl	133	515	0.43	33.82	0	no RNA 3
FUS:311	HDSEQDNSDNNTIFVQGLGENVTIESVADYFKQIGIIK-K32-156	FUS	-	monolink	311	n/a	0	37.28	0	RNA 1
FUS:321	KTGQPMINLYTDR-K1-155	FUS	-	monolink	321	n/a	0	38.46	0	RNA 1
FUS:337	TGQPMINLYTDRETGKLK-K16-156	FUS	-	monolink	337	n/a	0	33.77	0	RNA 1
FUS:339	LKGEATVSFDDPPSAK-K2-156	FUS	-	monolink	339	n/a	0.21	42.57	0	RNA 1
FUS:353	GEATVSFDDPPSAKAAIDWFDGK-K14-156	FUS	-	monolink	353	n/a	0.07	36.99	0	RNA 1
FUS:362	AAIDWFDGKEFSGNPIK-K9-155	FUS	-	monolink	362	n/a	0.11	50.75	0	RNA 1
FUS:370	EFSGNPIKVSFATR-K8-155	FUS	-	monolink	370	n/a	0	52.38	0	RNA 1
FUS:432	AGDWKCPNPTCENMNFSWR-K5-155	FUS	-	monolink	432	n/a	0	46.64	0	RNA 1
FUS:453	NECNQCKAPKPDGPGGGPGGSHMGGNYGDDR-K7-155	FUS	-	monolink	453	n/a	0	36.75	0	RNA 1
FUS:456	APKPDGPGGGPGGSHMGGNYGDDRR-K3-155	FUS	-	monolink	456	n/a	0	37.28	0	RNA 1
FUS:515	GGFGPGKMDSRGEHR-K7-156	FUS	-	monolink	515	n/a	0.17	34.84	0	RNA 1
HspB8:102	TPPPFPGEPWKVCVNVHSFKPEELMVK-K11-156	HspB8	-	monolink	102	n/a	0	27.39	0	RNA 1
HspB8:111	VCVNVHSFKPEELMVK-K9-155	HspB8	-	monolink	111	n/a	0.32	40.24	0	RNA 1
HspB8:118	VCVNVHSFKPEELMVKTK-K16-156	HspB8	-	monolink	118	n/a	0.28	48.62	0	RNA 1
HspB8:120	TKDGYVEVSGKHEEK-K2-155	HspB8	-	monolink	120	n/a	0.21	34.56	0	RNA 1
HspB8:129	DGYVEVSGKHEEKQQEGGIVSK-K9-156	HspB8	-	monolink	129	n/a	0.09	41.66	0	RNA 1
HspB8:133	HEEKQQEGGIVSK-K4-155	HspB8	-	monolink	133	n/a	0.17	49.54	0	RNA 1
HspB8:142	QQEGGIVSKNFTK-K9-156	HspB8	-	monolink	142	n/a	0	39.35	0	RNA 1
FUS:269:x:FUS:317	GGFNKFGGPR-QIGIIKTNK-a5-b6	FUS	FUS	intra-protein xl	269	317	0.66	29.16	0	RNA 1
FUS:269:x:FUS:321	KTGQPMINLYTDR-GGFNKFGGPR-a1-b5	FUS	FUS	intra-protein xl	321	269	0	33.94	0	RNA 1
FUS:269:x:FUS:337	GGFNKFGGPR-ETGKLK-a5-b4	FUS	FUS	intra-protein xl	269	337	0	33.7	0	RNA 1
FUS:269:x:FUS:339	LKGEATVSFDDPPSAK-GGFNKFGGPR-a2-b5	FUS	FUS	intra-protein xl	339	269	0.34	43.68	0	RNA 1
FUS:269:x:FUS:362	AAIDWFDGKEFSGNPIK-GGFNKFGGPR-a9-b5	FUS	FUS	intra-protein xl	362	269	0.23	34.53	0	RNA 1
FUS:269:x:FUS:370	EFSGNPIKVSFATR-GGFNKFGGPR-a8-b5	FUS	FUS	intra-protein xl	370	269	0	33.81	0	RNA 1
FUS:269:x:FUS:456	APKPDGPGGGPGGSHMGGNYGDDR-GGFNKFGGPR-a3-b5	FUS	FUS	intra-protein xl	456	269	0	31.1	0	RNA 1
FUS:269:x:FUS:515	GGFGPGKMDSR-GGFNKFGGPR-a7-b5	FUS	FUS	intra-protein xl	515	269	0.68	42.04	0	RNA 1
FUS:317:x:FUS:321	KTGQPMINLYTDR-QIGIIKTNK-a1-b6	FUS	FUS	intra-protein xl	321	317	0	32.59	0	RNA 1
FUS:317:x:FUS:337	QIGIIKTNK-ETGKLK-a6-b4	FUS	FUS	intra-protein xl	317	337	0.62	39.08	0	RNA 1
FUS:317:x:FUS:339	LKGEATVSFDDPPSAK-QIGIIKTNK-a2-b6	FUS	FUS	intra-protein xl	339	317	0.85	32.24	0	RNA 1
FUS:317:x:FUS:362	AAIDWFDGKEFSGNPIK-QIGIIKTNK-a9-b6	FUS	FUS	intra-protein xl	362	317	0	27.22	0	RNA 1
FUS:317:x:FUS:515	GGFGPGKMDSR-QIGIIKTNK-a7-b6	FUS	FUS	intra-protein xl	515	317	0.58	31.18	0	RNA 1
FUS:321:x:FUS:337	KTGQPMINLYTDR-ETGKLK-a1-b4	FUS	FUS	intra-protein xl	321	337	0	37.38	0	RNA 1
FUS:321:x:FUS:339	LKGEATVSFDDPPSAK-KTGQPMINLYTDR-a2-b1	FUS	FUS	intra-protein xl	339	321	0.56	37.06	0	RNA 1
FUS:321:x:FUS:362	AAIDWFDGKEFSGNPIK-KTGQPMINLYTDR-a9-b1	FUS	FUS	intra-protein xl	362	321	0.64	36.15	0	RNA 1
FUS:321:x:FUS:370	EFSGNPIKVSFATR-KTGQPMINLYTDR-a8-b1	FUS	FUS	intra-protein xl	370	321	0	35.4	0	RNA 1
FUS:321:x:FUS:456	APKPDGPGGGPGGSHMGGNYGDDR-KTGQPMINLYTDR-a3-b1	FUS	FUS	intra-protein xl	456	321	0	29.85	0	RNA 1
FUS:321:x:FUS:515	KTGQPMINLYTDR-GGFGPGKMDSR-a1-b7	FUS	FUS	intra-protein xl	321	515	0.79	35.89	0	RNA 1
FUS:337:x:FUS:339	LKGEATVSFDDPPSAK-ETGKLK-a2-b4	FUS	FUS	intra-protein xl	339	337	0.23	33.64	0	RNA 1
FUS:337:x:FUS:362	AAIDWFDGKEFSGNPIK-ETGKLK-a9-b4	FUS	FUS	intra-protein xl	362	337	0.36	34.56	0	RNA 1
FUS:337:x:FUS:370	EFSGNPIKVSFATR-ETGKLK-a8-b4	FUS	FUS	intra-protein xl	370	337	0.25	30.96	0	RNA 1
FUS:337:x:FUS:453	NECNQCKAPKPDGPGGGPGGSHMGGNYGDDR-ETGKLK-a7-b4	FUS	FUS	intra-protein xl	453	337	0	28.41	0	RNA 1
FUS:337:x:FUS:515	GGFGPGKMDSR-ETGKLK-a7-b4	FUS	FUS	intra-protein xl	515	337	0.49	38.02	0	RNA 1
FUS:339:x:FUS:362	AAIDWFDGKEFSGNPIK-LKGEATVSFDDPPSAK-a9-b2	FUS	FUS	intra-protein xl	362	339	0.52	41.04	0	RNA 1
FUS:339:x:FUS:370	LKGEATVSFDDPPSAK-EFSGNPIKVSFATR-a2-b8	FUS	FUS	intra-protein xl	339	370	0.42	35.52	0	RNA 1
FUS:339:x:FUS:432	AGDWKCPNPTCENMNFSWR-LKGEATVSFDDPPSAK-a5-b2	FUS	FUS	intra-protein xl	432	339	0	37.54	0	RNA 1
FUS:339:x:FUS:453	NECNQCKAPKPDGPGGGPGGSHMGGNYGDDR-LKGEATVSFDDPPSAK-a7-b2	FUS	FUS	intra-protein xl	453	339	0.83	26.85	0	RNA 1
FUS:339:x:FUS:456	APKPDGPGGGPGGSHMGGNYGDDR-LKGEATVSFDDPPSAK-a3-b2	FUS	FUS	intra-protein xl	456	339	0.29	27.06	0	RNA 1
FUS:339:x:FUS:515	LKGEATVSFDDPPSAK-GGFGPGKMDSR-a2-b7	FUS	FUS	intra-protein xl	339	515	0.36	42.04	0	RNA 1
FUS:362:x:FUS:362	AAIDWFDGKEFSGNPIK-AAIDWFDGKEFSGNPIK-a9-b9	FUS	FUS	intra-protein xl	362	362	0	41.99	0	RNA 1
FUS:362:x:FUS:370	AAIDWFDGKEFSGNPIK-EFSGNPIKVSFATR-a9-b8	FUS	FUS	intra-protein xl	362	370	0	28.28	0	RNA 1
FUS:362:x:FUS:432	AGDWKCPNPTCENMNFSWR-AAIDWFDGKEFSGNPIK-a5-b9	FUS	FUS	intra-protein xl	432	362	0.43	41.02	0	RNA 1
FUS:362:x:FUS:456	APKPDGPGGGPGGSHMGGNYGDDR-AAIDWFDGKEFSGNPIK-a3-b9	FUS	FUS	intra-protein xl	456	362	0	28.45	0	RNA 1
FUS:362:x:FUS:515	AAIDWFDGKEFSGNPIK-GGFGPGKMDSR-a9-b7	FUS	FUS	intra-protein xl	362	515	0.44	41.76	0	RNA 1
FUS:370:x:FUS:370	EFSGNPIKVSFATR-EFSGNPIKVSFATR-a8-b8	FUS	FUS	intra-protein xl	370	370	0	26.34	0	RNA 1
FUS:370:x:FUS:432	AGDWKCPNPTCENMNFSWR-EFSGNPIKVSFATR-a5-b8	FUS	FUS	intra-protein xl	432	370	0.58	33.86	0	RNA 1
FUS:370:x:FUS:456	APKPDGPGGGPGGSHMGGNYGDDR-EFSGNPIKVSFATR-a3-b8	FUS	FUS	intra-protein xl	456	370	0	29.81	0	RNA 1
FUS:370:x:FUS:515	EFSGNPIKVSFATR-GGFGPGKMDSR-a8-b7	FUS	FUS	intra-protein xl	370	515	0	35.97	0	RNA 1
FUS:432:x:FUS:453	NECNQCKAPKPDGPGGGPGGSHMGGNYGDDR-AGDWKCPNPTCENMNFSWR-a7-b5	FUS	FUS	intra-protein xl	453	432	0.72	36.53	0	RNA 1
FUS:432:x:FUS:456	APKPDGPGGGPGGSHMGGNYGDDR-AGDWKCPNPTCENMNFSWR-a3-b5	FUS	FUS	intra-protein xl	456	432	0	34.3	0	RNA 1
FUS:432:x:FUS:515	AGDWKCPNPTCENMNFSWR-GGFGPGKMDSR-a5-b7	FUS	FUS	intra-protein xl	432	515	0.44	43.64	0	RNA 1
FUS:453:x:FUS:515	NECNQCKAPKPDGPGGGPGGSHMGGNYGDDR-GGFGPGKMDSR-a7-b7	FUS	FUS	intra-protein xl	453	515	0.7	30.13	0	RNA 1
FUS:456:x:FUS:515	APKPDGPGGGPGGSHMGGNYGDDR-GGFGPGKMDSR-a3-b7	FUS	FUS	intra-protein xl	456	515	0.72	31.92	0	RNA 1
FUS:515:x:FUS:515	GGFGPGKMDSR-GGFGPGKMDSR-a7-b7	FUS	FUS	intra-protein xl	515	515	0	36.79	0	RNA 1
HspB8:111:x:HspB8:120	VCVNVHSFKPEELMVK-TKDGYVEVSGK-a9-b2	HspB8	HspB8	intra-protein xl	111	120	0.73	45.34	0	RNA 1
HspB8:111:x:HspB8:129	VCVNVHSFKPEELMVK-DGYVEVSGKHEEK-a9-b9	HspB8	HspB8	intra-protein xl	111	129	0.59	38.12	0	RNA 1
HspB8:118:x:HspB8:129	VCVNVHSFKPEELMVKTK-DGYVEVSGKHEEK-a16-b9	HspB8	HspB8	intra-protein xl	118	129	0.71	34.77	0	RNA 1
HspB8:120:x:HspB8:129	DGYVEVSGKHEEK-TKDGYVEVSGK-a9-b2	HspB8	HspB8	intra-protein xl	129	120	0.84	41.36	0	RNA 1
HspB8:120:x:HspB8:133	HEEKQQEGGIVSK-TKDGYVEVSGK-a4-b2	HspB8	HspB8	intra-protein xl	133	120	0.65	44.25	0	RNA 1
HspB8:129:x:HspB8:129	DGYVEVSGKHEEK-DGYVEVSGKHEEK-a9-b9	HspB8	HspB8	intra-protein xl	129	129	0.69	38.07	0	RNA 1
FUS:311:x:FUS:317	HDSEQDNSDNNTIFVQGLGENVTIESVADYFKQIGIIKTNK-K32-K38	FUS	-	looplink	311	317	0	26.52	0	RNA 1
FUS:317:x:FUS:321	QIGIIKTNKK-K6-K10	FUS	-	looplink	317	321	0	28.37	0	RNA 1
FUS:320:x:FUS:321	TNKKTGQPMINLYTDR-K3-K4	FUS	-	looplink	320	321	0	37.59	0	RNA 1
FUS:337:x:FUS:339	ETGKLKGEATVSFDDPPSAK-K4-K6	FUS	-	looplink	337	339	0	41.71	0	RNA 1
FUS:353:x:FUS:362	GEATVSFDDPPSAKAAIDWFDGKEFSGNPIK-K14-K23	FUS	-	looplink	353	362	0.1	34.3	0	RNA 1
FUS:362:x:FUS:370	AAIDWFDGKEFSGNPIKVSFATR-K9-K17	FUS	-	looplink	362	370	0	41.33	0	RNA 1
FUS:453:x:FUS:456	NECNQCKAPKPDGPGGGPGGSHMGGNYGDDR-K7-K10	FUS	-	looplink	453	456	0.01	33.12	0	RNA 1
HspB8:111:x:HspB8:118	VCVNVHSFKPEELMVKTK-K9-K16	HspB8	-	looplink	111	118	0.4	31.23	0	RNA 1
HspB8:111:x:HspB8:120	VCVNVHSFKPEELMVKTK-K9-K18	HspB8	-	looplink	111	120	0.45	28.18	0	RNA 1
HspB8:118:x:HspB8:120	VCVNVHSFKPEELMVKTKDGYVEVSGK-K16-K18	HspB8	-	looplink	118	120	0	49.82	0	RNA 1
HspB8:129:x:HspB8:133	DGYVEVSGKHEEKQQEGGIVSK-K9-K13	HspB8	-	looplink	129	133	0.08	45.57	0	RNA 1
HspB8:133:x:HspB8:142	HEEKQQEGGIVSKNFTK-K4-K13	HspB8	-	looplink	133	142	0	32.51	0	RNA 1
HspB8:142:x:HspB8:146	QQEGGIVSKNFTKK-K9-K13	HspB8	-	looplink	142	146	0.4	36.73	0	RNA 1
HspB8:142:x:HspB8:147	QQEGGIVSKNFTKK-K9-K14	HspB8	-	looplink	142	147	0	32.27	0	RNA 1
HspB8:146:x:HspB8:147	QQEGGIVSKNFTKK-K13-K14	HspB8	-	looplink	146	147	0.44	33.73	0	RNA 1
FUS:321:x:HspB8:120	KTGQPMINLYTDR-TKDGYVEVSGK-a1-b2	FUS	HspB8	inter-protein xl	321	120	0.73	37.84	0	RNA 1
FUS:321:x:HspB8:129	DGYVEVSGKHEEK-KTGQPMINLYTDR-a9-b1	HspB8	FUS	inter-protein xl	129	321	0	33.44	0	RNA 1
FUS:337:x:HspB8:120	TKDGYVEVSGK-ETGKLK-a2-b4	HspB8	FUS	inter-protein xl	120	337	0	32.2	0	RNA 1
FUS:339:x:HspB8:120	LKGEATVSFDDPPSAK-TKDGYVEVSGK-a2-b2	FUS	HspB8	inter-protein xl	339	120	0.72	33.94	0	RNA 1
FUS:339:x:HspB8:133	LKGEATVSFDDPPSAK-HEEKQQEGGIVSK-a2-b4	FUS	HspB8	inter-protein xl	339	133	0.87	29.04	0	RNA 1
FUS:362:x:HspB8:120	AAIDWFDGKEFSGNPIK-TKDGYVEVSGK-a9-b2	FUS	HspB8	inter-protein xl	362	120	0.8	35.77	0	RNA 1
FUS:362:x:HspB8:129	AAIDWFDGKEFSGNPIK-DGYVEVSGKHEEK-a9-b9	FUS	HspB8	inter-protein xl	362	129	0	34.37	0	RNA 1
FUS:370:x:HspB8:118	VCVNVHSFKPEELMVKTK-EFSGNPIKVSFATR-a16-b8	HspB8	FUS	inter-protein xl	118	370	0	31.7	0	RNA 1
FUS:370:x:HspB8:120	EFSGNPIKVSFATR-TKDGYVEVSGK-a8-b2	FUS	HspB8	inter-protein xl	370	120	0.79	32.99	0	RNA 1
FUS:370:x:HspB8:129	EFSGNPIKVSFATR-DGYVEVSGKHEEK-a8-b9	FUS	HspB8	inter-protein xl	370	129	0	29.93	0	RNA 1
FUS:456:x:HspB8:120	APKPDGPGGGPGGSHMGGNYGDDR-TKDGYVEVSGK-a3-b2	FUS	HspB8	inter-protein xl	456	120	0	31.86	0	RNA 1
FUS:456:x:HspB8:129	APKPDGPGGGPGGSHMGGNYGDDR-DGYVEVSGKHEEK-a3-b9	FUS	HspB8	inter-protein xl	456	129	0.59	39.7	0	RNA 1
FUS:515:x:HspB8:111	VCVNVHSFKPEELMVK-GGFGPGKMDSR-a9-b7	HspB8	FUS	inter-protein xl	111	515	0.7	37.33	0	RNA 1
FUS:515:x:HspB8:129	DGYVEVSGKHEEK-GGFGPGKMDSR-a9-b7	HspB8	FUS	inter-protein xl	129	515	0.42	35.97	0	RNA 1
FUS:515:x:HspB8:133	HEEKQQEGGIVSK-GGFGPGKMDSR-a4-b7	HspB8	FUS	inter-protein xl	133	515	0	29.14	0	RNA 1
FUS:311	HDSEQDNSDNNTIFVQGLGENVTIESVADYFKQIGIIK-K32-155	FUS	-	monolink	311	n/a	0.15	44.22	0	RNA 2
FUS:321	KTGQPMINLYTDRETGK-K1-156	FUS	-	monolink	321	n/a	0	25.15	0	RNA 2
FUS:337	TGQPMINLYTDRETGKLK-K16-156	FUS	-	monolink	337	n/a	0	25.82	0	RNA 2
FUS:339	LKGEATVSFDDPPSAK-K2-156	FUS	-	monolink	339	n/a	0.19	37.82	0	RNA 2
FUS:353	GEATVSFDDPPSAKAAIDWFDGK-K14-156	FUS	-	monolink	353	n/a	0.13	38.13	0	RNA 2
FUS:362	AAIDWFDGKEFSGNPIK-K9-156	FUS	-	monolink	362	n/a	0.11	49.38	0	RNA 2
FUS:370	EFSGNPIKVSFATR-K8-156	FUS	-	monolink	370	n/a	0	49.56	0	RNA 2
FUS:432	AGDWKCPNPTCENMNFSWR-K5-155	FUS	-	monolink	432	n/a	0	42.42	0	RNA 2
FUS:453	NECNQCKAPKPDGPGGGPGGSHMGGNYGDDR-K7-155	FUS	-	monolink	453	n/a	0.1	37.71	0	RNA 2
FUS:456	APKPDGPGGGPGGSHMGGNYGDDRR-K3-156	FUS	-	monolink	456	n/a	0	36.78	0	RNA 2
HspB8:102	TPPPFPGEPWKVCVNVHSFKPEELMVK-K11-155	HspB8	-	monolink	102	n/a	0	31.02	0	RNA 2
HspB8:111	VCVNVHSFKPEELMVK-K9-156	HspB8	-	monolink	111	n/a	0.21	39.04	0	RNA 2
HspB8:118	VCVNVHSFKPEELMVKTK-K16-155	HspB8	-	monolink	118	n/a	0.18	44.13	0	RNA 2
HspB8:120	VCVNVHSFKPEELMVKTK-K18-156	HspB8	-	monolink	120	n/a	0.18	44.86	0	RNA 2
HspB8:129	DGYVEVSGKHEEKQQEGGIVSK-K9-156	HspB8	-	monolink	129	n/a	0.23	44.43	0	RNA 2
HspB8:133	DGYVEVSGKHEEKQQEGGIVSK-K13-156	HspB8	-	monolink	133	n/a	0.06	44.22	0	RNA 2
HspB8:142	QQEGGIVSKNFTKK-K9-156	HspB8	-	monolink	142	n/a	0.34	26.62	0	RNA 2
FUS:269:x:FUS:317	GGFNKFGGPR-QIGIIKTNK-a5-b6	FUS	FUS	intra-protein xl	269	317	0.82	25.89	0.038	RNA 2
FUS:269:x:FUS:321	KTGQPMINLYTDR-GGFNKFGGPR-a1-b5	FUS	FUS	intra-protein xl	321	269	0	35.97	0	RNA 2
FUS:269:x:FUS:337	GGFNKFGGPR-ETGKLK-a5-b4	FUS	FUS	intra-protein xl	269	337	0	43.21	0	RNA 2
FUS:269:x:FUS:339	LKGEATVSFDDPPSAK-GGFNKFGGPR-a2-b5	FUS	FUS	intra-protein xl	339	269	0.3	40.65	0	RNA 2
FUS:269:x:FUS:370	EFSGNPIKVSFATR-GGFNKFGGPR-a8-b5	FUS	FUS	intra-protein xl	370	269	0	35.32	0	RNA 2
FUS:269:x:FUS:432	AGDWKCPNPTCENMNFSWR-GGFNKFGGPR-a5-b5	FUS	FUS	intra-protein xl	432	269	0	44.77	0	RNA 2
FUS:269:x:FUS:456	APKPDGPGGGPGGSHMGGNYGDDR-GGFNKFGGPR-a3-b5	FUS	FUS	intra-protein xl	456	269	0	33.3	0	RNA 2
FUS:269:x:FUS:515	GGFGPGKMDSR-GGFNKFGGPR-a7-b5	FUS	FUS	intra-protein xl	515	269	0.64	45.16	0	RNA 2
FUS:317:x:FUS:321	KTGQPMINLYTDR-QIGIIKTNK-a1-b6	FUS	FUS	intra-protein xl	321	317	0	33.78	0	RNA 2
FUS:317:x:FUS:339	LKGEATVSFDDPPSAK-QIGIIKTNK-a2-b6	FUS	FUS	intra-protein xl	339	317	0.93	27.58	0.02	RNA 2
FUS:317:x:FUS:362	AAIDWFDGKEFSGNPIK-QIGIIKTNK-a9-b6	FUS	FUS	intra-protein xl	362	317	0	34.26	0	RNA 2
FUS:317:x:FUS:456	APKPDGPGGGPGGSHMGGNYGDDR-QIGIIKTNK-a3-b6	FUS	FUS	intra-protein xl	456	317	0	26.22	0.038	RNA 2
FUS:317:x:FUS:515	GGFGPGKMDSR-QIGIIKTNK-a7-b6	FUS	FUS	intra-protein xl	515	317	0.71	35.39	0	RNA 2
FUS:321:x:FUS:337	KTGQPMINLYTDR-ETGKLK-a1-b4	FUS	FUS	intra-protein xl	321	337	0	34.39	0	RNA 2
FUS:321:x:FUS:339	LKGEATVSFDDPPSAK-KTGQPMINLYTDR-a2-b1	FUS	FUS	intra-protein xl	339	321	0.5	42	0	RNA 2
FUS:321:x:FUS:362	AAIDWFDGKEFSGNPIK-KTGQPMINLYTDR-a9-b1	FUS	FUS	intra-protein xl	362	321	0.65	28.73	0.02	RNA 2
FUS:321:x:FUS:456	APKPDGPGGGPGGSHMGGNYGDDR-KTGQPMINLYTDR-a3-b1	FUS	FUS	intra-protein xl	456	321	0	32.39	0	RNA 2
FUS:321:x:FUS:515	KTGQPMINLYTDR-GGFGPGKMDSR-a1-b7	FUS	FUS	intra-protein xl	321	515	0	37.97	0	RNA 2
FUS:337:x:FUS:339	LKGEATVSFDDPPSAK-ETGKLK-a2-b4	FUS	FUS	intra-protein xl	339	337	0.22	32.66	0	RNA 2
FUS:337:x:FUS:362	AAIDWFDGKEFSGNPIK-ETGKLK-a9-b4	FUS	FUS	intra-protein xl	362	337	0.43	29.74	0.02	RNA 2
FUS:337:x:FUS:370	EFSGNPIKVSFATR-ETGKLK-a8-b4	FUS	FUS	intra-protein xl	370	337	0.38	31.36	0	RNA 2
FUS:337:x:FUS:432	AGDWKCPNPTCENMNFSWR-ETGKLK-a5-b4	FUS	FUS	intra-protein xl	432	337	0.17	31.84	0	RNA 2
FUS:337:x:FUS:515	GGFGPGKMDSR-ETGKLK-a7-b4	FUS	FUS	intra-protein xl	515	337	0.49	33.99	0	RNA 2
FUS:339:x:FUS:362	AAIDWFDGKEFSGNPIK-LKGEATVSFDDPPSAK-a9-b2	FUS	FUS	intra-protein xl	362	339	0.53	39.49	0	RNA 2
FUS:339:x:FUS:370	LKGEATVSFDDPPSAK-EFSGNPIKVSFATR-a2-b8	FUS	FUS	intra-protein xl	339	370	0.38	31.24	0	RNA 2
FUS:339:x:FUS:432	AGDWKCPNPTCENMNFSWR-LKGEATVSFDDPPSAK-a5-b2	FUS	FUS	intra-protein xl	432	339	0	30.4	0.02	RNA 2
FUS:339:x:FUS:456	APKPDGPGGGPGGSHMGGNYGDDR-LKGEATVSFDDPPSAK-a3-b2	FUS	FUS	intra-protein xl	456	339	0	30.6	0.02	RNA 2
FUS:339:x:FUS:515	LKGEATVSFDDPPSAK-GGFGPGKMDSR-a2-b7	FUS	FUS	intra-protein xl	339	515	0.28	35.25	0	RNA 2
FUS:353:x:FUS:370	GEATVSFDDPPSAKAAIDWFDGK-EFSGNPIKVSFATR-a14-b8	FUS	FUS	intra-protein xl	353	370	0.47	26.94	0.02	RNA 2
FUS:362:x:FUS:362	AAIDWFDGKEFSGNPIK-AAIDWFDGKEFSGNPIK-a9-b9	FUS	FUS	intra-protein xl	362	362	0	47.35	0	RNA 2
FUS:362:x:FUS:370	AAIDWFDGKEFSGNPIK-EFSGNPIKVSFATR-a9-b8	FUS	FUS	intra-protein xl	362	370	0.56	35.6	0	RNA 2
FUS:362:x:FUS:432	AGDWKCPNPTCENMNFSWR-AAIDWFDGKEFSGNPIK-a5-b9	FUS	FUS	intra-protein xl	432	362	0	49.11	0	RNA 2
FUS:362:x:FUS:456	APKPDGPGGGPGGSHMGGNYGDDR-AAIDWFDGKEFSGNPIK-a3-b9	FUS	FUS	intra-protein xl	456	362	0.19	26.44	0.02	RNA 2
FUS:362:x:FUS:515	AAIDWFDGKEFSGNPIK-GGFGPGKMDSR-a9-b7	FUS	FUS	intra-protein xl	362	515	0.38	43.8	0	RNA 2
FUS:370:x:FUS:370	EFSGNPIKVSFATR-EFSGNPIKVSFATR-a8-b8	FUS	FUS	intra-protein xl	370	370	0	29.72	0.02	RNA 2
FUS:370:x:FUS:432	AGDWKCPNPTCENMNFSWR-EFSGNPIKVSFATR-a5-b8	FUS	FUS	intra-protein xl	432	370	0	33.84	0	RNA 2
FUS:370:x:FUS:453	NECNQCKAPKPDGPGGGPGGSHMGGNYGDDR-EFSGNPIKVSFATR-a7-b8	FUS	FUS	intra-protein xl	453	370	0.81	25.7	0.038	RNA 2
FUS:370:x:FUS:456	APKPDGPGGGPGGSHMGGNYGDDR-EFSGNPIKVSFATR-a3-b8	FUS	FUS	intra-protein xl	456	370	0	32.7	0	RNA 2
FUS:370:x:FUS:515	EFSGNPIKVSFATR-GGFGPGKMDSR-a8-b7	FUS	FUS	intra-protein xl	370	515	0	36.44	0	RNA 2
FUS:432:x:FUS:456	APKPDGPGGGPGGSHMGGNYGDDR-AGDWKCPNPTCENMNFSWR-a3-b5	FUS	FUS	intra-protein xl	456	432	0	32.27	0	RNA 2
FUS:432:x:FUS:515	AGDWKCPNPTCENMNFSWR-GGFGPGKMDSR-a5-b7	FUS	FUS	intra-protein xl	432	515	0	40.88	0	RNA 2
FUS:453:x:FUS:515	NECNQCKAPKPDGPGGGPGGSHMGGNYGDDR-GGFGPGKMDSR-a7-b7	FUS	FUS	intra-protein xl	453	515	0	36.29	0	RNA 2
FUS:456:x:FUS:515	APKPDGPGGGPGGSHMGGNYGDDR-GGFGPGKMDSR-a3-b7	FUS	FUS	intra-protein xl	456	515	0	29.83	0.02	RNA 2
FUS:515:x:FUS:515	GGFGPGKMDSR-GGFGPGKMDSR-a7-b7	FUS	FUS	intra-protein xl	515	515	0	38.84	0	RNA 2
HspB8:111:x:HspB8:120	VCVNVHSFKPEELMVK-TKDGYVEVSGK-a9-b2	HspB8	HspB8	intra-protein xl	111	120	0.72	43.09	0	RNA 2
HspB8:111:x:HspB8:129	VCVNVHSFKPEELMVK-DGYVEVSGKHEEK-a9-b9	HspB8	HspB8	intra-protein xl	111	129	0.68	36.04	0	RNA 2
HspB8:111:x:HspB8:133	VCVNVHSFKPEELMVK-HEEKQQEGGIVSK-a9-b4	HspB8	HspB8	intra-protein xl	111	133	0.41	25.16	0.044	RNA 2
HspB8:118:x:HspB8:129	VCVNVHSFKPEELMVKTK-DGYVEVSGKHEEK-a16-b9	HspB8	HspB8	intra-protein xl	118	129	0.64	39.66	0	RNA 2
HspB8:120:x:HspB8:120	TKDGYVEVSGK-TKDGYVEVSGK-a2-b2	HspB8	HspB8	intra-protein xl	120	120	0	41.41	0	RNA 2
HspB8:120:x:HspB8:129	DGYVEVSGKHEEK-TKDGYVEVSGK-a9-b2	HspB8	HspB8	intra-protein xl	129	120	0.5	43.6	0	RNA 2
HspB8:120:x:HspB8:133	HEEKQQEGGIVSK-TKDGYVEVSGK-a4-b2	HspB8	HspB8	intra-protein xl	133	120	0.7	44.56	0	RNA 2
HspB8:129:x:HspB8:129	DGYVEVSGKHEEK-DGYVEVSGKHEEK-a9-b9	HspB8	HspB8	intra-protein xl	129	129	0	37.94	0	RNA 2
HspB8:129:x:HspB8:142	DGYVEVSGKHEEK-QQEGGIVSKNFTK-a9-b9	HspB8	HspB8	intra-protein xl	129	142	0.86	26.19	0.038	RNA 2
FUS:311:x:FUS:320	HDSEQDNSDNNTIFVQGLGENVTIESVADYFKQIGIIKTNK-K32-K41	FUS	-	looplink	311	320	0	34.43	0	RNA 2
FUS:320:x:FUS:321	TNKKTGQPMINLYTDR-K3-K4	FUS	-	looplink	320	321	0	36.3	0	RNA 2
FUS:337:x:FUS:339	ETGKLKGEATVSFDDPPSAK-K4-K6	FUS	-	looplink	337	339	0	41.99	0	RNA 2
FUS:353:x:FUS:362	GEATVSFDDPPSAKAAIDWFDGKEFSGNPIK-K14-K23	FUS	-	looplink	353	362	0.18	37.47	0	RNA 2
FUS:362:x:FUS:370	AAIDWFDGKEFSGNPIKVSFATR-K9-K17	FUS	-	looplink	362	370	0	39.63	0	RNA 2
FUS:453:x:FUS:456	NECNQCKAPKPDGPGGGPGGSHMGGNYGDDR-K7-K10	FUS	-	looplink	453	456	0.04	33.65	0	RNA 2
HspB8:118:x:HspB8:120	VCVNVHSFKPEELMVKTKDGYVEVSGK-K16-K18	HspB8	-	looplink	118	120	0	44.69	0	RNA 2
HspB8:120:x:HspB8:129	TKDGYVEVSGKHEEK-K2-K11	HspB8	-	looplink	120	129	0.27	27.95	0	RNA 2
HspB8:129:x:HspB8:133	DGYVEVSGKHEEKQQEGGIVSK-K9-K13	HspB8	-	looplink	129	133	0.04	46.05	0	RNA 2
HspB8:133:x:HspB8:142	HEEKQQEGGIVSKNFTK-K4-K13	HspB8	-	looplink	133	142	0	31.59	0	RNA 2
HspB8:142:x:HspB8:147	QQEGGIVSKNFTKK-K9-K14	HspB8	-	looplink	142	147	0.47	31.57	0	RNA 2
FUS:269:x:HspB8:129	DGYVEVSGKHEEK-GGFNKFGGPR-a9-b5	HspB8	FUS	inter-protein xl	129	269	0.47	26.04	0	RNA 2
FUS:321:x:HspB8:120	KTGQPMINLYTDR-TKDGYVEVSGK-a1-b2	FUS	HspB8	inter-protein xl	321	120	0.74	32.49	0	RNA 2
FUS:337:x:HspB8:111	VCVNVHSFKPEELMVK-ETGKLK-a9-b4	HspB8	FUS	inter-protein xl	111	337	0.63	29.02	0	RNA 2
FUS:337:x:HspB8:120	TKDGYVEVSGK-ETGKLK-a2-b4	HspB8	FUS	inter-protein xl	120	337	0.38	34.37	0	RNA 2
FUS:362:x:HspB8:120	AAIDWFDGKEFSGNPIK-TKDGYVEVSGK-a9-b2	FUS	HspB8	inter-protein xl	362	120	0	39.19	0	RNA 2
FUS:362:x:HspB8:129	AAIDWFDGKEFSGNPIK-DGYVEVSGKHEEK-a9-b9	FUS	HspB8	inter-protein xl	362	129	0.33	35.72	0	RNA 2
FUS:370:x:HspB8:111	VCVNVHSFKPEELMVKTK-EFSGNPIKVSFATR-a9-b8	HspB8	FUS	inter-protein xl	111	370	0	31.05	0	RNA 2
FUS:370:x:HspB8:120	EFSGNPIKVSFATR-TKDGYVEVSGK-a8-b2	FUS	HspB8	inter-protein xl	370	120	0.8	32.46	0	RNA 2
FUS:370:x:HspB8:129	EFSGNPIKVSFATR-DGYVEVSGKHEEK-a8-b9	FUS	HspB8	inter-protein xl	370	129	0	29.46	0	RNA 2
FUS:515:x:HspB8:111	VCVNVHSFKPEELMVK-GGFGPGKMDSR-a9-b7	HspB8	FUS	inter-protein xl	111	515	0.73	38.94	0	RNA 2
FUS:515:x:HspB8:129	DGYVEVSGKHEEK-GGFGPGKMDSR-a9-b7	HspB8	FUS	inter-protein xl	129	515	0	37.98	0	RNA 2
FUS:515:x:HspB8:133	HEEKQQEGGIVSK-GGFGPGKMDSR-a4-b7	HspB8	FUS	inter-protein xl	133	515	0	31.93	0	RNA 2
FUS:311	HDSEQDNSDNNTIFVQGLGENVTIESVADYFKQIGIIK-K32-155	FUS	-	monolink	311	n/a	0.07	40.86	0	RNA 3
FUS:321	KTGQPMINLYTDRETGK-K1-156	FUS	-	monolink	321	n/a	0	30.97	0	RNA 3
FUS:337	TGQPMINLYTDRETGKLK-K16-156	FUS	-	monolink	337	n/a	0	26.38	0	RNA 3
FUS:339	LKGEATVSFDDPPSAK-K2-156	FUS	-	monolink	339	n/a	0.15	40.68	0	RNA 3
FUS:353	GEATVSFDDPPSAKAAIDWFDGK-K14-155	FUS	-	monolink	353	n/a	0.16	45.53	0	RNA 3
FUS:362	AAIDWFDGKEFSGNPIK-K9-155	FUS	-	monolink	362	n/a	0	47.6	0	RNA 3
FUS:370	EFSGNPIKVSFATR-K8-155	FUS	-	monolink	370	n/a	0	49.39	0	RNA 3
FUS:432	AGDWKCPNPTCENMNFSWR-K5-155	FUS	-	monolink	432	n/a	0.04	44.73	0	RNA 3
FUS:453	NECNQCKAPKPDGPGGGPGGSHMGGNYGDDR-K7-155	FUS	-	monolink	453	n/a	0.01	34.72	0	RNA 3
FUS:456	APKPDGPGGGPGGSHMGGNYGDDR-K3-155	FUS	-	monolink	456	n/a	0	40.8	0	RNA 3
HspB8:102	TPPPFPGEPWKVCVNVHSFKPEELMVK-K11-156	HspB8	-	monolink	102	n/a	0	31.87	0	RNA 3
HspB8:111	VCVNVHSFKPEELMVK-K9-155	HspB8	-	monolink	111	n/a	0.36	40.9	0	RNA 3
HspB8:118	VCVNVHSFKPEELMVKTK-K16-155	HspB8	-	monolink	118	n/a	0.13	44.32	0	RNA 3
HspB8:120	VCVNVHSFKPEELMVKTK-K18-155	HspB8	-	monolink	120	n/a	0.18	40.49	0	RNA 3
HspB8:129	DGYVEVSGKHEEKQQEGGIVSK-K9-155	HspB8	-	monolink	129	n/a	0.09	42.45	0	RNA 3
HspB8:133	HEEKQQEGGIVSK-K4-155	HspB8	-	monolink	133	n/a	0.34	46.44	0	RNA 3
FUS:269:x:FUS:317	GGFNKFGGPR-QIGIIKTNK-a5-b6	FUS	FUS	intra-protein xl	269	317	0.55	30.96	0	RNA 3
FUS:269:x:FUS:321	KTGQPMINLYTDR-GGFNKFGGPR-a1-b5	FUS	FUS	intra-protein xl	321	269	0	35.92	0	RNA 3
FUS:269:x:FUS:337	GGFNKFGGPR-ETGKLK-a5-b4	FUS	FUS	intra-protein xl	269	337	0	33.77	0	RNA 3
FUS:269:x:FUS:339	LKGEATVSFDDPPSAK-GGFNKFGGPR-a2-b5	FUS	FUS	intra-protein xl	339	269	0.31	38.59	0	RNA 3
FUS:269:x:FUS:362	AAIDWFDGKEFSGNPIK-GGFNKFGGPR-a9-b5	FUS	FUS	intra-protein xl	362	269	0.34	35.82	0	RNA 3
FUS:269:x:FUS:370	EFSGNPIKVSFATR-GGFNKFGGPR-a8-b5	FUS	FUS	intra-protein xl	370	269	0	34.66	0	RNA 3
FUS:269:x:FUS:432	AGDWKCPNPTCENMNFSWR-GGFNKFGGPR-a5-b5	FUS	FUS	intra-protein xl	432	269	0	41.22	0	RNA 3
FUS:269:x:FUS:456	APKPDGPGGGPGGSHMGGNYGDDR-GGFNKFGGPR-a3-b5	FUS	FUS	intra-protein xl	456	269	0	29.67	0	RNA 3
FUS:269:x:FUS:515	GGFGPGKMDSR-GGFNKFGGPR-a7-b5	FUS	FUS	intra-protein xl	515	269	0	43.99	0	RNA 3
FUS:317:x:FUS:321	KTGQPMINLYTDR-QIGIIKTNK-a1-b6	FUS	FUS	intra-protein xl	321	317	0	32.27	0	RNA 3
FUS:317:x:FUS:337	QIGIIKTNK-ETGKLK-a6-b4	FUS	FUS	intra-protein xl	317	337	0.57	27.29	0	RNA 3
FUS:317:x:FUS:339	LKGEATVSFDDPPSAK-QIGIIKTNK-a2-b6	FUS	FUS	intra-protein xl	339	317	0.93	30.93	0	RNA 3
FUS:317:x:FUS:370	EFSGNPIKVSFATR-QIGIIKTNK-a8-b6	FUS	FUS	intra-protein xl	370	317	0.94	25.01	0	RNA 3
FUS:321:x:FUS:337	KTGQPMINLYTDR-ETGKLK-a1-b4	FUS	FUS	intra-protein xl	321	337	0	33.12	0	RNA 3
FUS:321:x:FUS:339	LKGEATVSFDDPPSAK-KTGQPMINLYTDR-a2-b1	FUS	FUS	intra-protein xl	339	321	0.57	37.39	0	RNA 3
FUS:321:x:FUS:362	AAIDWFDGKEFSGNPIK-KTGQPMINLYTDR-a9-b1	FUS	FUS	intra-protein xl	362	321	0.6	28.12	0	RNA 3
FUS:321:x:FUS:456	APKPDGPGGGPGGSHMGGNYGDDR-KTGQPMINLYTDR-a3-b1	FUS	FUS	intra-protein xl	456	321	0	27.42	0	RNA 3
FUS:321:x:FUS:515	KTGQPMINLYTDR-GGFGPGKMDSR-a1-b7	FUS	FUS	intra-protein xl	321	515	0	34.54	0	RNA 3
FUS:337:x:FUS:339	LKGEATVSFDDPPSAK-ETGKLK-a2-b4	FUS	FUS	intra-protein xl	339	337	0.2	32.16	0	RNA 3
FUS:337:x:FUS:362	AAIDWFDGKEFSGNPIK-ETGKLK-a9-b4	FUS	FUS	intra-protein xl	362	337	0.35	30.72	0	RNA 3
FUS:337:x:FUS:370	EFSGNPIKVSFATR-ETGKLK-a8-b4	FUS	FUS	intra-protein xl	370	337	0.26	31.6	0	RNA 3
FUS:337:x:FUS:432	AGDWKCPNPTCENMNFSWR-ETGKLK-a5-b4	FUS	FUS	intra-protein xl	432	337	0.14	33.65	0	RNA 3
FUS:337:x:FUS:453	NECNQCKAPKPDGPGGGPGGSHMGGNYGDDR-ETGKLK-a7-b4	FUS	FUS	intra-protein xl	453	337	0.42	33.1	0	RNA 3
FUS:337:x:FUS:515	GGFGPGKMDSR-ETGKLK-a7-b4	FUS	FUS	intra-protein xl	515	337	0.43	33.16	0	RNA 3
FUS:339:x:FUS:362	AAIDWFDGKEFSGNPIK-LKGEATVSFDDPPSAK-a9-b2	FUS	FUS	intra-protein xl	362	339	0.58	37.57	0	RNA 3
FUS:339:x:FUS:370	LKGEATVSFDDPPSAK-EFSGNPIKVSFATR-a2-b8	FUS	FUS	intra-protein xl	339	370	0.2	32.9	0	RNA 3
FUS:339:x:FUS:432	AGDWKCPNPTCENMNFSWR-LKGEATVSFDDPPSAK-a5-b2	FUS	FUS	intra-protein xl	432	339	0	36.42	0	RNA 3
FUS:339:x:FUS:456	APKPDGPGGGPGGSHMGGNYGDDR-LKGEATVSFDDPPSAK-a3-b2	FUS	FUS	intra-protein xl	456	339	0	34.88	0	RNA 3
FUS:339:x:FUS:515	LKGEATVSFDDPPSAK-GGFGPGKMDSR-a2-b7	FUS	FUS	intra-protein xl	339	515	0.49	37.27	0	RNA 3
FUS:362:x:FUS:362	AAIDWFDGKEFSGNPIK-AAIDWFDGKEFSGNPIK-a9-b9	FUS	FUS	intra-protein xl	362	362	0	40.49	0	RNA 3
FUS:362:x:FUS:370	AAIDWFDGKEFSGNPIK-EFSGNPIKVSFATR-a9-b8	FUS	FUS	intra-protein xl	362	370	0.64	30.63	0	RNA 3
FUS:362:x:FUS:432	AGDWKCPNPTCENMNFSWR-AAIDWFDGKEFSGNPIK-a5-b9	FUS	FUS	intra-protein xl	432	362	0	36.92	0	RNA 3
FUS:362:x:FUS:456	APKPDGPGGGPGGSHMGGNYGDDR-AAIDWFDGKEFSGNPIK-a3-b9	FUS	FUS	intra-protein xl	456	362	0	27.52	0	RNA 3
FUS:362:x:FUS:515	AAIDWFDGKEFSGNPIK-GGFGPGKMDSR-a9-b7	FUS	FUS	intra-protein xl	362	515	0.21	42.41	0	RNA 3
FUS:370:x:FUS:432	AGDWKCPNPTCENMNFSWR-EFSGNPIKVSFATR-a5-b8	FUS	FUS	intra-protein xl	432	370	0	37.23	0	RNA 3
FUS:370:x:FUS:453	NECNQCKAPKPDGPGGGPGGSHMGGNYGDDR-EFSGNPIKVSFATR-a7-b8	FUS	FUS	intra-protein xl	453	370	0.8	25.34	0	RNA 3
FUS:370:x:FUS:456	APKPDGPGGGPGGSHMGGNYGDDR-EFSGNPIKVSFATR-a3-b8	FUS	FUS	intra-protein xl	456	370	0	36.01	0	RNA 3
FUS:370:x:FUS:515	EFSGNPIKVSFATR-GGFGPGKMDSR-a8-b7	FUS	FUS	intra-protein xl	370	515	0	37.87	0	RNA 3
FUS:432:x:FUS:456	APKPDGPGGGPGGSHMGGNYGDDR-AGDWKCPNPTCENMNFSWR-a3-b5	FUS	FUS	intra-protein xl	456	432	0	31.75	0	RNA 3
FUS:432:x:FUS:515	AGDWKCPNPTCENMNFSWR-GGFGPGKMDSR-a5-b7	FUS	FUS	intra-protein xl	432	515	0	39.96	0	RNA 3
FUS:453:x:FUS:515	NECNQCKAPKPDGPGGGPGGSHMGGNYGDDR-GGFGPGKMDSR-a7-b7	FUS	FUS	intra-protein xl	453	515	0.73	34.49	0	RNA 3
FUS:456:x:FUS:515	APKPDGPGGGPGGSHMGGNYGDDR-GGFGPGKMDSR-a3-b7	FUS	FUS	intra-protein xl	456	515	0	31.96	0	RNA 3
FUS:515:x:FUS:515	GGFGPGKMDSR-GGFGPGKMDSR-a7-b7	FUS	FUS	intra-protein xl	515	515	0	41.18	0	RNA 3
HspB8:111:x:HspB8:120	VCVNVHSFKPEELMVK-TKDGYVEVSGK-a9-b2	HspB8	HspB8	intra-protein xl	111	120	0.7	41.76	0	RNA 3
HspB8:111:x:HspB8:129	VCVNVHSFKPEELMVK-DGYVEVSGKHEEK-a9-b9	HspB8	HspB8	intra-protein xl	111	129	0.62	37.03	0	RNA 3
HspB8:111:x:HspB8:133	VCVNVHSFKPEELMVK-HEEKQQEGGIVSK-a9-b4	HspB8	HspB8	intra-protein xl	111	133	0.54	26.97	0	RNA 3
HspB8:118:x:HspB8:129	VCVNVHSFKPEELMVKTK-DGYVEVSGKHEEK-a16-b9	HspB8	HspB8	intra-protein xl	118	129	0.68	34.09	0	RNA 3
HspB8:120:x:HspB8:120	TKDGYVEVSGK-TKDGYVEVSGK-a2-b2	HspB8	HspB8	intra-protein xl	120	120	0.71	29.52	0	RNA 3
HspB8:120:x:HspB8:129	DGYVEVSGKHEEK-TKDGYVEVSGK-a9-b2	HspB8	HspB8	intra-protein xl	129	120	0.67	43.43	0	RNA 3
HspB8:120:x:HspB8:133	HEEKQQEGGIVSK-TKDGYVEVSGK-a4-b2	HspB8	HspB8	intra-protein xl	133	120	0.56	39.22	0	RNA 3
HspB8:129:x:HspB8:129	DGYVEVSGKHEEK-DGYVEVSGKHEEK-a9-b9	HspB8	HspB8	intra-protein xl	129	129	0.66	36.05	0	RNA 3
FUS:311:x:FUS:320	HDSEQDNSDNNTIFVQGLGENVTIESVADYFKQIGIIKTNK-K32-K41	FUS	-	looplink	311	320	0	29.77	0	RNA 3
FUS:320:x:FUS:321	TNKKTGQPMINLYTDR-K3-K4	FUS	-	looplink	320	321	0	36.49	0	RNA 3
FUS:337:x:FUS:339	ETGKLKGEATVSFDDPPSAK-K4-K6	FUS	-	looplink	337	339	0	41.18	0	RNA 3
FUS:353:x:FUS:362	GEATVSFDDPPSAKAAIDWFDGKEFSGNPIK-K14-K23	FUS	-	looplink	353	362	0.15	33.76	0	RNA 3
FUS:362:x:FUS:370	AAIDWFDGKEFSGNPIKVSFATR-K9-K17	FUS	-	looplink	362	370	0	36.33	0	RNA 3
FUS:453:x:FUS:456	NECNQCKAPKPDGPGGGPGGSHMGGNYGDDR-K7-K10	FUS	-	looplink	453	456	0.03	29.97	0	RNA 3
HspB8:111:x:HspB8:118	VCVNVHSFKPEELMVKTK-K9-K16	HspB8	-	looplink	111	118	0.56	27.89	0	RNA 3
HspB8:111:x:HspB8:120	VCVNVHSFKPEELMVKTK-K9-K18	HspB8	-	looplink	111	120	0.42	29.78	0	RNA 3
HspB8:118:x:HspB8:120	VCVNVHSFKPEELMVKTKDGYVEVSGK-K16-K18	HspB8	-	looplink	118	120	0	53.43	0	RNA 3
HspB8:129:x:HspB8:133	DGYVEVSGKHEEKQQEGGIVSK-K9-K13	HspB8	-	looplink	129	133	0.08	46.48	0	RNA 3
HspB8:133:x:HspB8:142	HEEKQQEGGIVSKNFTK-K4-K13	HspB8	-	looplink	133	142	0.41	28.83	0	RNA 3
HspB8:142:x:HspB8:146	QQEGGIVSKNFTKK-K9-K13	HspB8	-	looplink	142	146	0	32.83	0	RNA 3
HspB8:142:x:HspB8:147	QQEGGIVSKNFTKK-K9-K14	HspB8	-	looplink	142	147	0.47	31.06	0	RNA 3
FUS:269:x:HspB8:129	DGYVEVSGKHEEK-GGFNKFGGPR-a9-b5	HspB8	FUS	inter-protein xl	129	269	0.25	27.56	0	RNA 3
FUS:321:x:HspB8:120	KTGQPMINLYTDR-TKDGYVEVSGK-a1-b2	FUS	HspB8	inter-protein xl	321	120	0	38.68	0	RNA 3
FUS:321:x:HspB8:129	DGYVEVSGKHEEK-KTGQPMINLYTDR-a9-b1	HspB8	FUS	inter-protein xl	129	321	0	28.83	0	RNA 3
FUS:337:x:HspB8:111	VCVNVHSFKPEELMVK-ETGKLK-a9-b4	HspB8	FUS	inter-protein xl	111	337	0.59	28.35	0	RNA 3
FUS:337:x:HspB8:120	TKDGYVEVSGK-ETGKLK-a2-b4	HspB8	FUS	inter-protein xl	120	337	0.3	32.47	0	RNA 3
FUS:337:x:HspB8:129	DGYVEVSGKHEEK-ETGKLK-a9-b4	HspB8	FUS	inter-protein xl	129	337	0.75	25.12	0	RNA 3
FUS:339:x:HspB8:120	LKGEATVSFDDPPSAK-TKDGYVEVSGK-a2-b2	FUS	HspB8	inter-protein xl	339	120	0.79	37.7	0	RNA 3
FUS:362:x:HspB8:120	AAIDWFDGKEFSGNPIK-TKDGYVEVSGK-a9-b2	FUS	HspB8	inter-protein xl	362	120	0	38.29	0	RNA 3
FUS:362:x:HspB8:129	AAIDWFDGKEFSGNPIK-DGYVEVSGKHEEK-a9-b9	FUS	HspB8	inter-protein xl	362	129	0.25	37.63	0	RNA 3
FUS:370:x:HspB8:120	EFSGNPIKVSFATR-TKDGYVEVSGK-a8-b2	FUS	HspB8	inter-protein xl	370	120	0.74	35.59	0	RNA 3
FUS:370:x:HspB8:129	EFSGNPIKVSFATR-DGYVEVSGKHEEK-a8-b9	FUS	HspB8	inter-protein xl	370	129	0.94	28.23	0	RNA 3
FUS:432:x:HspB8:120	AGDWKCPNPTCENMNFSWR-TKDGYVEVSGK-a5-b2	FUS	HspB8	inter-protein xl	432	120	0	31.51	0	RNA 3
FUS:515:x:HspB8:111	VCVNVHSFKPEELMVK-GGFGPGKMDSR-a9-b7	HspB8	FUS	inter-protein xl	111	515	0.87	36.44	0	RNA 3
FUS:515:x:HspB8:129	DGYVEVSGKHEEK-GGFGPGKMDSR-a9-b7	HspB8	FUS	inter-protein xl	129	515	0	41.5	0	RNA 3
