# Supplementary material for: HspB8 prevents aberrant phase transitions of FUS by chaperoning its folded RNA-binding domain
Source: eLife. 2021 Sep 6;10:e69377. doi: 10.7554/eLife.69377 (PMC8510580; doi:10.7554/eLife.69377)
Supplement: Supplementary file 6. [file elife-69377-supp6.xlsx]

## Sheet: Legend
Legends for Supplemental Data 6
Supplemental Table 1. FUSB8 K141E and FUSB8wt Low Salt Crosslink Identification. Related to Figure 6 E and F
Supplemental Table 2. FUSB8 K141E vs FUSB8wt Low Salt Crosslink Quantification. Related to Figure 6 F
Legend referring to Tables S1
uxID	unique lysine to lysine crosslinking site, includes crosslinked protein names and absolute position of crosslinked lysine. All peptides linking the same lysines (different cleavage sites, charge states and heavy/light pairs) belong to a single uxID
Id	amino acid sequence of crosslinked peptide a and peptide b including the position of crosslinking sites in peptide a and peptide b
Protein1	name of protein to which peptide a belongs
Protein2	name of protein to which peptide b belongs
XLType	type of linker attachment (inter-protein crosslink, intra-protein crosslink, looplink or monolink).Looplink, a link between two lysines within one peptide.
AbsPos1	absolute position of crosslinked lysine residue in protein 1 (including 5 AA N-terminal tag)
AbsPos2	absolute position of crosslinked lysine residue in protein 2 (including 5 AA N-terminal tag)
deltaS	deltaS score is a measure for how close the best assigned hit scored in regard to second best
ld-Score	linear discriminant score; scoring scheme to discriminate between true positive crosslinks and false positive hits																									FDR	FDR	FDR	FDR	FDR	FDR	FDR	FDR	FDR	FDR	FDR	FDR	FDR	FDR	FDR	FDR	FDR	FDR	FDR	FDR	FDR	FDR	FDR	FDR
FDR	FDR was calculated by xProphet as described (Leitner et al., Nat Protoc, 2014). FDR filtering was done on the uxID level and only uxIDs with an FDR ≤ 0.05 in at least one replicate were considered
No of Ids in triplicates	indicates in how many of three replicates the corresponding uxID was identified
Legend referring to Table S2
uxID	unique lysine to lysine crosslinking site, includes crosslinked protein names and absolute position of crosslinked lysine. All peptides linking the same lysines (different cleavage sites, charge states and heavy/light pairs) belong to a single uxID
experiment	the condition used for relative quantification relative to the reference condition
link_type	type of linker attachment (inter-protein crosslink, intra-protein crosslink, looplink or monolink).Looplink, a link between two lysines within one peptide.
ms1_area_sum	log2 converted peak area of the extracted total ion chromatogram (MS1 intensity along retention time) for the corresponding uxID within an experiment. Peak areas of different peptides connecting the same lysines are summed up but for a light/heavy pair as well as biological replicates of the same peptide the mean is taken.
imputed	a value between 0-2 indicating the fraction of imputed peptide observations for a given uxID corresponding to the current experiment condition
ms1_area_sum_ref	log2 converted peak area of the extracted total ion chromatogram (MS1 intensity along retention time) for the corresponding uxID within the reference experiment. Peak areas of different peptides connecting the same lysines are summed up but for a light/heavy pair as well as biological replicates of the same peptide the mean is taken.
imputed_ref	a value between 0-2 indicating the fraction of imputed peptide observations for a given uxID corresponding to the reference experiment condition
log2ratio	the log2 ratio of the experiment vs. the reference experiment. Calculated as difference between ms1_area_sum and ms1_area_sum_ref
reference experiment	the condition which was used as reference for relative quantification
pvalue	p-value as calculated by a two-sided t-test using the peptide observations of the log2 converted peak area of the experiment and reference experiment as input (light/heavy pairs and biological replicates as input observations)
FDR	p-values corrected for multiple testing following the Benjamini–Hochberg procedure
[truncated: 5,000 more columns]

## Sheet: Table S1
Supplemental Table 1. FUSB8 K141E and FUSB8wt Low Salt Crosslink Identification. Related to Figure 6 E and F
Crosslinks were only considered, if they were identified in two out of three replicates with a deltaS < 0.95, a minimum Id score ≥ 20 and an ld score ≥ 25 in at least one replicate (filtering was done on the level of the unique cross-linking site) and an FDR < 0.05 as calculated by xProphet for at least one replicate.
Only the highest scoring crosslink from three replicates is shown.
FUSB8wt data are already shown in Supplementary Data 3 Table S2
uxID	Id	Protein1	Protein2	XLType	AbsPos1	AbsPos2	deltaS	ld-Score	FDR	Experiment	No of Ids in triplicates
FUS:317:x:HspB8_K141E:120	TKDGYVEVSGK-QIGIIKTNK-a2-b6	HspB8_K141E	FUS	inter-protein xl	120	317	0.57	27.74	0	FUSB8_K141E	2
FUS:337:x:HspB8_K141E:120	TKDGYVEVSGK-ETGKLK-a2-b4	HspB8_K141E	FUS	inter-protein xl	120	337	0.51	28.14	0	FUSB8_K141E	2
FUS:337:x:HspB8_K141E:129	TKDGYVEVSGKHEEK-ETGKLK-a11-b4	HspB8_K141E	FUS	inter-protein xl	129	337	0	28.41	0	FUSB8_K141E	3
FUS:339:x:HspB8:120	LKGEATVSFDDPPSAK-TKDGYVEVSGK-a2-b2	FUS	HspB8	inter-protein xl	339	120	0.32	33.63	0	FUSB8wt	2
FUS:339:x:HspB8:133	LKGEATVSFDDPPSAK-HEEKQQEGGIVSK-a2-b4	FUS	HspB8	inter-protein xl	339	133	0.87	32.67	0	FUSB8wt	3
FUS:339:x:HspB8_K141E:	ZGPLGSMADGQMPFSCHYPSR-LKGEATVSFDDPPSAK-a1-b2	HspB8_K141E	FUS	inter-protein xl	1	339	0.43	30.21	0	FUSB8_K141E	2
FUS:339:x:HspB8_K141E:120	LKGEATVSFDDPPSAK-TKDGYVEVSGK-a2-b2	FUS	HspB8_K141E	inter-protein xl	339	120	0.52	32.58	0	FUSB8_K141E	3
FUS:339:x:HspB8_K141E:133	LKGEATVSFDDPPSAK-HEEKQQEGGIVSK-a2-b4	FUS	HspB8_K141E	inter-protein xl	339	133	0.82	30.89	0	FUSB8_K141E	3
FUS:362:x:HspB8_K141E:	ZGPLGSMADGQMPFSCHYPSR-AAIDWFDGKEFSGNPIK-a1-b9	HspB8_K141E	FUS	inter-protein xl	1	362	0	38.1	0	FUSB8_K141E	3
FUS:362:x:HspB8_K141E:120	AAIDWFDGKEFSGNPIK-TKDGYVEVSGK-a9-b2	FUS	HspB8_K141E	inter-protein xl	362	120	0	35.54	0	FUSB8_K141E	3
FUS:370:x:HspB8:120	EFSGNPIKVSFATR-TKDGYVEVSGK-a8-b2	FUS	HspB8	inter-protein xl	370	120	0	27.22	0	FUSB8wt	2
FUS:456:x:HspB8_K141E:120	APKPDGPGGGPGGSHMGGNYGDDR-TKDGYVEVSGK-a3-b2	FUS	HspB8_K141E	inter-protein xl	456	120	0	28.19	0	FUSB8_K141E	2
FUS:456:x:HspB8_K141E:129	APKPDGPGGGPGGSHMGGNYGDDR-TKDGYVEVSGKHEEK-a3-b11	FUS	HspB8_K141E	inter-protein xl	456	129	0.66	30.98	0	FUSB8_K141E	3
FUS:515:x:HspB8_K141E:	ZGPLGSMADGQMPFSCHYPSR-GGFGPGKMDSR-a1-b7	HspB8_K141E	FUS	inter-protein xl	1	515	0	25.18	0	FUSB8_K141E	2
FUS:515:x:HspB8_K141E:129	TKDGYVEVSGKHEEK-GGFGPGKMDSR-a11-b7	HspB8_K141E	FUS	inter-protein xl	129	515	0	30.97	0	FUSB8_K141E	2
FUS:515:x:HspB8_K141E:142	QQEGGIVSKNFTEK-GGFGPGKMDSR-a9-b7	HspB8_K141E	FUS	inter-protein xl	142	515	0.8	25.59	0	FUSB8_K141E	3
FUS:311:x:FUS:317	HDSEQDNSDNNTIFVQGLGENVTIESVADYFKQIGIIKTNK-K32-K38	FUS	-	looplink	311	317	0	28.72	0	FUSB8wt	2
FUS:320:x:FUS:321	TNKKTGQPMINLYTDR-K3-K4	FUS	-	looplink	320	321	0	40.89	0	FUSB8wt	3
FUS:337:x:FUS:339	ETGKLKGEATVSFDDPPSAK-K4-K6	FUS	-	looplink	337	339	0	37.49	0	FUSB8wt	3
FUS:337:x:FUS:339	ETGKLKGEATVSFDDPPSAK-K4-K6	FUS	-	looplink	337	339	0	36.28	0	FUSB8_K141E	3
FUS:362:x:FUS:370	AAIDWFDGKEFSGNPIKVSFATR-K9-K17	FUS	-	looplink	362	370	0	36.3	0	FUSB8wt	3
FUS:362:x:FUS:370	AAIDWFDGKEFSGNPIKVSFATR-K9-K17	FUS	-	looplink	362	370	0	35.74	0	FUSB8_K141E	3
FUS:453:x:FUS:456	NECNQCKAPKPDGPGGGPGGSHMGGNYGDDR-K7-K10	FUS	-	looplink	453	456	-0.02	30.11	0	FUSB8wt	3
FUS:453:x:FUS:456	NECNQCKAPKPDGPGGGPGGSHMGGNYGDDR-K7-K10	FUS	-	looplink	453	456	0.12	28.93	0	FUSB8_K141E	3
HspB8:102:x:HspB8:111	TPPPFPGEPWKVCVNVHSFKPEELMVK-K11-K20	HspB8	-	looplink	102	111	0	25.58	0	FUSB8wt	2
HspB8:111:x:HspB8:118	VCVNVHSFKPEELMVKTK-K9-K16	HspB8	-	looplink	111	118	0	33.25	0	FUSB8wt	2
HspB8:111:x:HspB8:120	VCVNVHSFKPEELMVKTKDGYVEVSGK-K9-K18	HspB8	-	looplink	111	120	0	27.14	0	FUSB8wt	2
HspB8:118:x:HspB8:120	VCVNVHSFKPEELMVKTKDGYVEVSGK-K16-K18	HspB8	-	looplink	118	120	0	46.48	0	FUSB8wt	3
HspB8:129:x:HspB8:133	DGYVEVSGKHEEKQQEGGIVSK-K9-K13	HspB8	-	looplink	129	133	0	45.92	0	FUSB8wt	3
HspB8:133:x:HspB8:142	HEEKQQEGGIVSKNFTK-K4-K13	HspB8	-	looplink	133	142	0.5	28.36	0	FUSB8wt	3
HspB8:142:x:HspB8:146	QQEGGIVSKNFTKK-K9-K13	HspB8	-	looplink	142	146	0	36.71	0	FUSB8wt	3
HspB8:142:x:HspB8:147	QQEGGIVSKNFTKK-K9-K14	HspB8	-	looplink	142	147	0.44	35.85	0	FUSB8wt	2
HspB8:146:x:HspB8:147	QQEGGIVSKNFTKK-K13-K14	HspB8	-	looplink	146	147	0	35.19	0	FUSB8wt	2
HspB8_K141E:102:x:HspB8_K141E:111	TPPPFPGEPWKVCVNVHSFKPEELMVK-K11-K20	HspB8_K141E	-	looplink	102	111	0	25.48	0	FUSB8_K141E	3
HspB8_K141E:111:x:HspB8_K141E:118	VCVNVHSFKPEELMVKTK-K9-K16	HspB8_K141E	-	looplink	111	118	0	31.29	0	FUSB8_K141E	3
HspB8_K141E:111:x:HspB8_K141E:120	VCVNVHSFKPEELMVKTKDGYVEVSGK-K9-K18	HspB8_K141E	-	looplink	111	120	0	31.7	0	FUSB8_K141E	2
HspB8_K141E:118:x:HspB8_K141E:120	VCVNVHSFKPEELMVKTKDGYVEVSGK-K16-K18	HspB8_K141E	-	looplink	118	120	0	45.19	0	FUSB8_K141E	3
HspB8_K141E:120:x:HspB8_K141E:129	TKDGYVEVSGKHEEK-K2-K11	HspB8_K141E	-	looplink	120	129	0	26.58	0	FUSB8_K141E	3
HspB8_K141E:129:x:HspB8_K141E:133	DGYVEVSGKHEEKQQEGGIVSK-K9-K13	HspB8_K141E	-	looplink	129	133	0	52.73	0	FUSB8_K141E	3
HspB8_K141E:129:x:HspB8_K141E:142	DGYVEVSGKHEEKQQEGGIVSK-K9-K22	HspB8_K141E	-	looplink	129	142	0	32.93	0	FUSB8_K141E	3
HspB8_K141E:133:x:HspB8_K141E:142	DGYVEVSGKHEEKQQEGGIVSK-K13-K22	HspB8_K141E	-	looplink	133	142	0.1	38.28	0	FUSB8_K141E	3
HspB8_K141E:142:x:HspB8_K141E:147	HEEKQQEGGIVSKNFTEK-K13-K18	HspB8_K141E	-	looplink	142	147	0.3	32.85	0	FUSB8_K141E	2
FUS:269:x:FUS:339	LKGEATVSFDDPPSAK-GGFNKFGGPR-a2-b5	FUS	FUS	intra-protein xl	339	269	0.35	39.17	0	FUSB8_K141E	3
FUS:269:x:FUS:339	LKGEATVSFDDPPSAK-GGFNKFGGPR-a2-b5	FUS	FUS	intra-protein xl	339	269	0	34.98	0	FUSB8wt	3
FUS:269:x:FUS:362	AAIDWFDGKEFSGNPIK-GGFNKFGGPR-a9-b5	FUS	FUS	intra-protein xl	362	269	0	39.04	0	FUSB8_K141E	3
FUS:317:x:FUS:321	KTGQPMINLYTDR-QIGIIKTNK-a1-b6	FUS	FUS	intra-protein xl	321	317	0	35.22	0	FUSB8_K141E	3
FUS:317:x:FUS:321	KTGQPMINLYTDR-QIGIIKTNK-a1-b6	FUS	FUS	intra-protein xl	321	317	0	33.11	0	FUSB8wt	3
FUS:317:x:FUS:339	LKGEATVSFDDPPSAK-QIGIIKTNK-a2-b6	FUS	FUS	intra-protein xl	339	317	0.86	26.64	0	FUSB8_K141E	2
FUS:317:x:FUS:362	AAIDWFDGKEFSGNPIK-QIGIIKTNK-a9-b6	FUS	FUS	intra-protein xl	362	317	0.78	33.15	0	FUSB8_K141E	3
FUS:321:x:FUS:362	AAIDWFDGKEFSGNPIK-KTGQPMINLYTDR-a9-b1	FUS	FUS	intra-protein xl	362	321	0	25.64	0.014	FUSB8_K141E	2
FUS:337:x:FUS:339	LKGEATVSFDDPPSAK-ETGKLK-a2-b4	FUS	FUS	intra-protein xl	339	337	0.32	32.17	0	FUSB8wt	3
FUS:337:x:FUS:339	LKGEATVSFDDPPSAK-ETGKLK-a2-b4	FUS	FUS	intra-protein xl	339	337	0.34	31.58	0	FUSB8_K141E	3
FUS:337:x:FUS:370	EFSGNPIKVSFATR-ETGKLK-a8-b4	FUS	FUS	intra-protein xl	370	337	0	30.17	0	FUSB8wt	3
FUS:337:x:FUS:370	EFSGNPIKVSFATR-ETGKLK-a8-b4	FUS	FUS	intra-protein xl	370	337	0	30.09	0.014	FUSB8_K141E	3
FUS:339:x:FUS:362	AAIDWFDGKEFSGNPIK-LKGEATVSFDDPPSAK-a9-b2	FUS	FUS	intra-protein xl	362	339	0.46	33.14	0	FUSB8_K141E	3
FUS:339:x:FUS:370	LKGEATVSFDDPPSAK-EFSGNPIKVSFATR-a2-b8	FUS	FUS	intra-protein xl	339	370	0	33.54	0	FUSB8wt	3
FUS:339:x:FUS:370	LKGEATVSFDDPPSAK-EFSGNPIKVSFATR-a2-b8	FUS	FUS	intra-protein xl	339	370	0.62	30.99	0.014	FUSB8_K141E	3
FUS:339:x:FUS:515	LKGEATVSFDDPPSAK-GGFGPGKMDSR-a2-b7	FUS	FUS	intra-protein xl	339	515	0.39	31.08	0	FUSB8_K141E	3
FUS:339:x:FUS:515	LKGEATVSFDDPPSAK-GGFGPGKMDSR-a2-b7	FUS	FUS	intra-protein xl	339	515	0	30.23	0	FUSB8wt	3
FUS:362:x:FUS:515	AAIDWFDGKEFSGNPIK-GGFGPGKMDSR-a9-b7	FUS	FUS	intra-protein xl	362	515	0	45.33	0	FUSB8_K141E	3
FUS:456:x:FUS:515	NECNQCKAPKPDGPGGGPGGSHMGGNYGDDR-GGFGPGKMDSR-a10-b7	FUS	FUS	intra-protein xl	456	515	0.74	29.25	0	FUSB8_K141E	3
HspB8:111:x:HspB8:120	VCVNVHSFKPEELMVK-TKDGYVEVSGK-a9-b2	HspB8	HspB8	intra-protein xl	111	120	0.81	33.28	0	FUSB8wt	3
HspB8:120:x:HspB8:120	TKDGYVEVSGK-TKDGYVEVSGK-a2-b2	HspB8	HspB8	intra-protein xl	120	120	0	42.48	0	FUSB8wt	2
HspB8:120:x:HspB8:129	TKDGYVEVSGKHEEK-TKDGYVEVSGK-a11-b2	HspB8	HspB8	intra-protein xl	129	120	0	37.87	0	FUSB8wt	3
HspB8:120:x:HspB8:133	HEEKQQEGGIVSK-TKDGYVEVSGK-a4-b2	HspB8	HspB8	intra-protein xl	133	120	0.81	36.49	0	FUSB8wt	3
HspB8:129:x:HspB8:129	TKDGYVEVSGKHEEK-DGYVEVSGKHEEK-a11-b9	HspB8	HspB8	intra-protein xl	129	129	0.67	41.43	0	FUSB8wt	3
HspB8:129:x:HspB8:133	DGYVEVSGKHEEK-HEEKQQEGGIVSK-a9-b4	HspB8	HspB8	intra-protein xl	129	133	0.74	32.24	0	FUSB8wt	2
HspB8_K141E::x:HspB8_K141E:	ZGPLGSMADGQMPFSCHYPSR-ZGPLGSMADGQMPFSCHYPSR-a1-b1	HspB8_K141E	HspB8_K141E	intra-protein xl	1	1	0	35.49	0	FUSB8_K141E	3
HspB8_K141E::x:HspB8_K141E:118	ZGPLGSMADGQMPFSCHYPSR-VCVNVHSFKPEELMVKTK-a1-b16	HspB8_K141E	HspB8_K141E	intra-protein xl	1	118	0.81	26.5	0.011	FUSB8_K141E	3
HspB8_K141E::x:HspB8_K141E:120	ZGPLGSMADGQMPFSCHYPSR-TKDGYVEVSGK-a1-b2	HspB8_K141E	HspB8_K141E	intra-protein xl	1	120	0	28.64	0	FUSB8_K141E	3
HspB8_K141E::x:HspB8_K141E:129	ZGPLGSMADGQMPFSCHYPSR-DGYVEVSGKHEEK-a1-b9	HspB8_K141E	HspB8_K141E	intra-protein xl	1	129	0.54	35.87	0	FUSB8_K141E	3
HspB8_K141E::x:HspB8_K141E:133	ZGPLGSMADGQMPFSCHYPSR-HEEKQQEGGIVSK-a1-b4	HspB8_K141E	HspB8_K141E	intra-protein xl	1	133	0	29.29	0	FUSB8_K141E	3
HspB8_K141E:111:x:HspB8_K141E:120	VCVNVHSFKPEELMVK-TKDGYVEVSGK-a9-b2	HspB8_K141E	HspB8_K141E	intra-protein xl	111	120	0.92	35.19	0	FUSB8_K141E	3
HspB8_K141E:111:x:HspB8_K141E:129	VCVNVHSFKPEELMVK-DGYVEVSGKHEEK-a9-b9	HspB8_K141E	HspB8_K141E	intra-protein xl	111	129	0.58	32.4	0	FUSB8_K141E	3
HspB8_K141E:111:x:HspB8_K141E:133	VCVNVHSFKPEELMVK-HEEKQQEGGIVSK-a9-b4	HspB8_K141E	HspB8_K141E	intra-protein xl	111	133	0.25	29.56	0	FUSB8_K141E	3
HspB8_K141E:111:x:HspB8_K141E:142	VCVNVHSFKPEELMVK-QQEGGIVSKNFTEK-a9-b9	HspB8_K141E	HspB8_K141E	intra-protein xl	111	142	0.53	32.64	0	FUSB8_K141E	3
HspB8_K141E:118:x:HspB8_K141E:129	VCVNVHSFKPEELMVKTK-DGYVEVSGKHEEK-a16-b9	HspB8_K141E	HspB8_K141E	intra-protein xl	118	129	0.71	36.82	0	FUSB8_K141E	3
HspB8_K141E:120:x:HspB8_K141E:120	TKDGYVEVSGK-TKDGYVEVSGK-a2-b2	HspB8_K141E	HspB8_K141E	intra-protein xl	120	120	0	38.03	0	FUSB8_K141E	3
HspB8_K141E:120:x:HspB8_K141E:129	TKDGYVEVSGKHEEK-TKDGYVEVSGK-a11-b2	HspB8_K141E	HspB8_K141E	intra-protein xl	129	120	0.57	42.87	0	FUSB8_K141E	3
HspB8_K141E:120:x:HspB8_K141E:133	DGYVEVSGKHEEKQQEGGIVSK-TKDGYVEVSGK-a13-b2	HspB8_K141E	HspB8_K141E	intra-protein xl	133	120	0.61	38.61	0	FUSB8_K141E	3
HspB8_K141E:120:x:HspB8_K141E:142	QQEGGIVSKNFTEK-TKDGYVEVSGK-a9-b2	HspB8_K141E	HspB8_K141E	intra-protein xl	142	120	0	33.25	0	FUSB8_K141E	2
HspB8_K141E:129:x:HspB8_K141E:129	TKDGYVEVSGKHEEK-DGYVEVSGKHEEK-a11-b9	HspB8_K141E	HspB8_K141E	intra-protein xl	129	129	0.65	41.25	0	FUSB8_K141E	3
HspB8_K141E:129:x:HspB8_K141E:133	DGYVEVSGKHEEK-HEEKQQEGGIVSK-a9-b4	HspB8_K141E	HspB8_K141E	intra-protein xl	129	133	0.76	32.05	0.014	FUSB8_K141E	3
HspB8_K141E:129:x:HspB8_K141E:142	QQEGGIVSKNFTEK-DGYVEVSGKHEEK-a9-b9	HspB8_K141E	HspB8_K141E	intra-protein xl	142	129	0.92	26.69	0.014	FUSB8_K141E	2
HspB8_K141E:133:x:HspB8_K141E:133	HEEKQQEGGIVSK-HEEKQQEGGIVSK-a4-b4	HspB8_K141E	HspB8_K141E	intra-protein xl	133	133	0	37.61	0	FUSB8_K141E	3
HspB8_K141E:133:x:HspB8_K141E:142	QQEGGIVSKNFTEK-HEEKQQEGGIVSK-a9-b4	HspB8_K141E	HspB8_K141E	intra-protein xl	142	133	0	28.08	0.014	FUSB8_K141E	3
HspB8_K141E:142:x:HspB8_K141E:142	HEEKQQEGGIVSKNFTEK-QQEGGIVSKNFTEK-a13-b9	HspB8_K141E	HspB8_K141E	intra-protein xl	142	142	0.66	25.37	0.024	FUSB8_K141E	3
FUS:311	HDSEQDNSDNNTIFVQGLGENVTIESVADYFKQIGIIK-K32-156	FUS	-	monolink	311		0	50.93	0	FUSB8wt	3
FUS:321	KTGQPMINLYTDRETGK-K1-155	FUS	-	monolink	321		0	37.19	0	FUSB8_K141E	3
FUS:321	KTGQPMINLYTDRETGK-K1-155	FUS	-	monolink	321		0	36.17	0	FUSB8wt	3
FUS:337	ETGKLKGEATVSFDDPPSAK-K4-155	FUS	-	monolink	337		0	40.04	0	FUSB8wt	3
FUS:337	ETGKLKGEATVSFDDPPSAK-K4-155	FUS	-	monolink	337		0	39.96	0	FUSB8_K141E	3
FUS:339	LKGEATVSFDDPPSAK-K2-156	FUS	-	monolink	339		0.22	43.89	0	FUSB8_K141E	3
FUS:339	LKGEATVSFDDPPSAK-K2-155	FUS	-	monolink	339		0.13	39.8	0	FUSB8wt	3
FUS:353	LKGEATVSFDDPPSAKAAIDWFDGK-K16-156	FUS	-	monolink	353		0.02	39	0	FUSB8wt	3
FUS:353	GEATVSFDDPPSAKAAIDWFDGK-K14-155	FUS	-	monolink	353		0.08	29.03	0	FUSB8_K141E	3
FUS:362	AAIDWFDGKEFSGNPIK-K9-155	FUS	-	monolink	362		0	48.36	0	FUSB8_K141E	3
FUS:362	AAIDWFDGKEFSGNPIK-K9-155	FUS	-	monolink	362		0.26	48.31	0	FUSB8wt	3
FUS:370	EFSGNPIKVSFATR-K8-156	FUS	-	monolink	370		0	47.9	0	FUSB8wt	3
FUS:370	EFSGNPIKVSFATR-K8-155	FUS	-	monolink	370		0	47.12	0	FUSB8_K141E	3
FUS:453	NECNQCKAPKPDGPGGGPGGSHMGGNYGDDR-K7-155	FUS	-	monolink	453		0	33.77	0	FUSB8_K141E	3
FUS:453	NECNQCKAPKPDGPGGGPGGSHMGGNYGDDR-K7-155	FUS	-	monolink	453		0.07	32.81	0	FUSB8wt	3
FUS:456	APKPDGPGGGPGGSHMGGNYGDDR-K3-155	FUS	-	monolink	456		0	33.99	0	FUSB8wt	3
FUS:456	APKPDGPGGGPGGSHMGGNYGDDRR-K3-155	FUS	-	monolink	456		0	32.33	0	FUSB8_K141E	3
HspB8:102	TPPPFPGEPWKVCVNVHSFKPEELMVK-K11-155	HspB8	-	monolink	102		0	28.32	0	FUSB8wt	3
HspB8:111	VCVNVHSFKPEELMVK-K9-156	HspB8	-	monolink	111		0.23	40.5	0	FUSB8wt	3
HspB8:118	VCVNVHSFKPEELMVKTK-K16-155	HspB8	-	monolink	118		0	42.47	0	FUSB8wt	3
HspB8:120	TKDGYVEVSGKHEEK-K2-155	HspB8	-	monolink	120		0.3	39.63	0	FUSB8wt	2
HspB8:129	TKDGYVEVSGKHEEK-K11-155	HspB8	-	monolink	129		0.19	40.16	0	FUSB8wt	3
HspB8:133	HEEKQQEGGIVSK-K4-155	HspB8	-	monolink	133		0.28	49.09	0	FUSB8wt	3
HspB8:142	HEEKQQEGGIVSKNFTK-K13-156	HspB8	-	monolink	142		0	39.56	0	FUSB8wt	3
HspB8_K141E:102	TPPPFPGEPWKVCVNVHSFKPEELMVK-K11-155	HspB8_K141E	-	monolink	102		0	29.3	0	FUSB8_K141E	3
HspB8_K141E:111	VCVNVHSFKPEELMVK-K9-155	HspB8_K141E	-	monolink	111		0	38.37	0	FUSB8_K141E	3
HspB8_K141E:118	VCVNVHSFKPEELMVKTK-K16-155	HspB8_K141E	-	monolink	118		0.28	47.06	0	FUSB8_K141E	3
HspB8_K141E:120	TKDGYVEVSGKHEEK-K2-155	HspB8_K141E	-	monolink	120		0.22	44.09	0	FUSB8_K141E	3
HspB8_K141E:129	DGYVEVSGKHEEKQQEGGIVSK-K9-155	HspB8_K141E	-	monolink	129		0.13	43.44	0	FUSB8_K141E	3
HspB8_K141E:133	HEEKQQEGGIVSK-K4-156	HspB8_K141E	-	monolink	133		0.2	50.18	0	FUSB8_K141E	3
HspB8_K141E:142	QQEGGIVSKNFTEK-K9-156	HspB8_K141E	-	monolink	142		0.07	49.79	0	FUSB8_K141E	3

## Sheet: Table S2
Supplemental Table 2. FUSB8 K141E vs FUSB8wt Low Salt Crosslink Quantification. Related to Figure 6 F
Quantifiaction for each unique crosslinking site shown in Table S1
(Note: both wt and mutant were named "HspB8" in order to enable relative quantification of peptides containing the same sequence)
uxID	experiment	link_type	ms1_area_sum	imputed	ms1_area_sum_ref	imputed_ref	log2ratio	reference experiment	pvalue	FDR
FUS-mutant:269:x:FUS-mutant:339	FUSB8_K141E	xlink	25.2321	0	25.9642	0	-0.732083	FUSB8wt	0.00440714	0.00837357
FUS-mutant:269:x:FUS-mutant:362	FUSB8_K141E	xlink	24.7727	0	23.7964	0	0.976282	FUSB8wt	0.0405941	0.0604932
FUS-mutant:311	FUSB8_K141E	monolink	23.4447	2	28.76	0	-5.31536	FUSB8wt	2.41e-08	2.29e-07
FUS-mutant:311:x:FUS-mutant:317	FUSB8_K141E	looplink	22.4717	1	24.6142	0	-2.14248	FUSB8wt	0.0434425	0.0634928
FUS-mutant:317:x:FUS-mutant:321	FUSB8_K141E	xlink	32.4518	0	31.8061	0	0.645683	FUSB8wt	0.000570349	0.0012749
FUS-mutant:317:x:FUS-mutant:339	FUSB8_K141E	xlink	25.0777	0	25.7868	0	-0.709046	FUSB8wt	0.0103264	0.0174402
FUS-mutant:317:x:FUS-mutant:362	FUSB8_K141E	xlink	25.2991	0	23.4653	0	1.83384	FUSB8wt	0.000286489	0.000680411
FUS-mutant:317:x:HspB8:120	FUSB8_K141E	xlink	21.2195	0	21.0274	0	0.192116	FUSB8wt	0.982456	0.992609
FUS-mutant:320:x:FUS-mutant:321	FUSB8_K141E	looplink	26.3297	0	25.2977	0	1.03194	FUSB8wt	0.200506	0.267342
FUS-mutant:321	FUSB8_K141E	monolink	26.1182	0	28.3055	0	-2.18724	FUSB8wt	0.0183332	0.0290276
FUS-mutant:337	FUSB8_K141E	monolink	29.6169	0	30.0169	0	-0.399961	FUSB8wt	0.124396	0.171892
FUS-mutant:337:x:FUS-mutant:339	FUSB8_K141E	looplink	28.3171	0	26.9785	0	1.33852	FUSB8wt	0.900086	0.950091
FUS-mutant:337:x:FUS-mutant:339	FUSB8_K141E	xlink	24.1707	0	24.3487	0	-0.178015	FUSB8wt	0.447323	0.52283
FUS-mutant:337:x:FUS-mutant:370	FUSB8_K141E	xlink	26.8565	0	26.9483	0	-0.0917456	FUSB8wt	0.607775	0.669433
FUS-mutant:337:x:HspB8:129	FUSB8_K141E	xlink	22.2509	1	22.6813	0	-0.43039	FUSB8wt	0.519256	0.580345
FUS-mutant:339	FUSB8_K141E	monolink	28.6315	0	30.6981	0	-2.06662	FUSB8wt	3.88e-06	1.84e-05
FUS-mutant:339:x:FUS-mutant:362	FUSB8_K141E	xlink	26.2001	0	28.0294	0	-1.82925	FUSB8wt	0.000121645	0.000373001
FUS-mutant:339:x:FUS-mutant:370	FUSB8_K141E	xlink	26.7005	0	28.7423	0	-2.04177	FUSB8wt	8.17e-07	5.64e-06
FUS-mutant:339:x:FUS-mutant:515	FUSB8_K141E	xlink	24.3042	0	23.7695	0	0.534657	FUSB8wt	0.447626	0.52283
FUS-mutant:339:x:HspB8:	FUSB8_K141E	xlink	22.2747	0	22.3465	1	-0.0718666	FUSB8wt	0.648553	0.704143
FUS-mutant:339:x:HspB8:120	FUSB8_K141E	xlink	25.6851	0	25.3873	0	0.297809	FUSB8wt	0.231518	0.303368
FUS-mutant:339:x:HspB8:133	FUSB8_K141E	xlink	25.5355	0	23.991	0	1.54442	FUSB8wt	3.67e-05	0.00013274
FUS-mutant:353	FUSB8_K141E	monolink	26.5584	1	28.7612	0	-2.20279	FUSB8wt	0.000122698	0.000373001
FUS-mutant:362	FUSB8_K141E	monolink	28.1315	0	29.6873	0	-1.5558	FUSB8wt	2.92e-05	0.000110873
FUS-mutant:362:x:FUS-mutant:370	FUSB8_K141E	looplink	26.1658	0	28.7464	0	-2.58059	FUSB8wt	2.17e-05	8.69e-05
FUS-mutant:362:x:FUS-mutant:515	FUSB8_K141E	xlink	26.2137	0	23.5458	0	2.66785	FUSB8wt	0.0109119	0.0180283
FUS-mutant:362:x:HspB8:	FUSB8_K141E	xlink	25.7038	0	21.2551	0.583333	4.44867	FUSB8wt	2.01e-05	8.47e-05
FUS-mutant:362:x:HspB8:120	FUSB8_K141E	xlink	25.002	0	22.5325	0	2.46952	FUSB8wt	0.000997566	0.00204905
FUS-mutant:370	FUSB8_K141E	monolink	29.1512	0	30.9751	0	-1.82396	FUSB8wt	2.17e-06	1.1e-05
FUS-mutant:370:x:HspB8:120	FUSB8_K141E	xlink	23.3504	0	24.5825	0	-1.23215	FUSB8wt	0.00635828	0.0112379
FUS-mutant:453	FUSB8_K141E	monolink	31.8467	0	30.4543	0	1.39235	FUSB8wt	0.00251556	0.00490212
FUS-mutant:453:x:FUS-mutant:456	FUSB8_K141E	looplink	30.7751	0	29.9773	0	0.797826	FUSB8wt	0.028546	0.0442754
FUS-mutant:456	FUSB8_K141E	monolink	32.5686	0	31.7796	0	0.789031	FUSB8wt	0.00921872	0.0159232
FUS-mutant:456:x:FUS-mutant:515	FUSB8_K141E	xlink	24.0213	0	21.758	0.583333	2.26325	FUSB8wt	0.00060257	0.00130844
FUS-mutant:456:x:HspB8:120	FUSB8_K141E	xlink	23.6187	0	21.1806	0.5	2.4381	FUSB8wt	0.0137227	0.02219
FUS-mutant:456:x:HspB8:129	FUSB8_K141E	xlink	21.9922	0.75	22.2822	1	-0.290011	FUSB8wt	0.969474	0.992609
FUS-mutant:515:x:HspB8:	FUSB8_K141E	xlink	25.4873	0	22.2561	1	3.23128	FUSB8wt	5.77e-05	0.000199454
FUS-mutant:515:x:HspB8:129	FUSB8_K141E	xlink	22.5231	1	21.7063	0.25	0.816794	FUSB8wt	0.173938	0.236058
FUS-mutant:515:x:HspB8:142	FUSB8_K141E	xlink	25.1403	0	22.3228	1	2.81742	FUSB8wt	0.000134137	0.000392093
HspB8::x:HspB8:	FUSB8_K141E	xlink	28.8678	0	24.2374	0.25	4.6304	FUSB8wt	0.0061048	0.0110468
HspB8::x:HspB8:118	FUSB8_K141E	xlink	27.8131	0	22.0978	0.833333	5.71531	FUSB8wt	1.49e-08	1.62e-07
HspB8::x:HspB8:120	FUSB8_K141E	xlink	29.1289	0	26.0029	0	3.12597	FUSB8wt	0.000174916	0.0004584
HspB8::x:HspB8:129	FUSB8_K141E	xlink	28.275	0	22.9316	0.333333	5.34344	FUSB8wt	9.99e-07	6.33e-06
HspB8::x:HspB8:133	FUSB8_K141E	xlink	25.5851	0	22.825	0	2.76005	FUSB8wt	0.0057658	0.0106878
HspB8:102	FUSB8_K141E	monolink	33.8474	0	33.9501	0	-0.102625	FUSB8wt	0.413206	0.506511
HspB8:102:x:HspB8:111	FUSB8_K141E	looplink	30.8716	0	31.039	0	-0.167399	FUSB8wt	0.454036	0.52283
HspB8:111	FUSB8_K141E	monolink	32.6648	0	32.2724	0	0.392453	FUSB8wt	0.238749	0.307541
HspB8:111:x:HspB8:118	FUSB8_K141E	looplink	29.6274	0	29.7998	0	-0.172373	FUSB8wt	0.831687	0.890257
HspB8:111:x:HspB8:120	FUSB8_K141E	looplink	30.8729	0	30.7725	0	0.100425	FUSB8wt	0.44979	0.52283
HspB8:111:x:HspB8:120	FUSB8_K141E	xlink	30.2579	0	26.4538	0	3.80416	FUSB8wt	9.84e-06	4.4e-05
HspB8:111:x:HspB8:129	FUSB8_K141E	xlink	32.9464	0	31.7734	0	1.17298	FUSB8wt	3.13e-08	2.65e-07
HspB8:111:x:HspB8:133	FUSB8_K141E	xlink	29.0787	0	25.1033	0	3.97535	FUSB8wt	0.000162515	0.000441111
HspB8:111:x:HspB8:142	FUSB8_K141E	xlink	28.8976	0	22.4809	1	6.41671	FUSB8wt	7e-11	2.24e-09
HspB8:118	FUSB8_K141E	monolink	33.1651	0	32.5912	0	0.573873	FUSB8wt	0.000638759	0.00134849
HspB8:118:x:HspB8:120	FUSB8_K141E	looplink	30.6945	0	30.6861	0	0.00840825	FUSB8wt	0.992609	0.992609
HspB8:118:x:HspB8:129	FUSB8_K141E	xlink	33.0907	0	31.7571	0	1.33363	FUSB8wt	1.59e-06	8.66e-06
HspB8:120	FUSB8_K141E	monolink	32.4247	0	31.955	0	0.469687	FUSB8wt	0.0017097	0.00341941
HspB8:120:x:HspB8:120	FUSB8_K141E	xlink	26.3417	0	26.2462	0	0.0954815	FUSB8wt	0.492301	0.558431
HspB8:120:x:HspB8:129	FUSB8_K141E	looplink	26.5877	0	27.0106	0	-0.42293	FUSB8wt	0.932374	0.970691
HspB8:120:x:HspB8:129	FUSB8_K141E	xlink	29.4448	0	29.6004	0	-0.155565	FUSB8wt	0.286094	0.362386
HspB8:120:x:HspB8:133	FUSB8_K141E	xlink	30.7232	0	27.1132	0	3.61002	FUSB8wt	1.21e-06	7.08e-06
HspB8:120:x:HspB8:142	FUSB8_K141E	xlink	28.5961	0	22.2341	1	6.36207	FUSB8wt	1.9e-09	2.89e-08
HspB8:129	FUSB8_K141E	monolink	33.5821	0	32.3978	0	1.18439	FUSB8wt	8.29e-05	0.000273865
HspB8:129:x:HspB8:129	FUSB8_K141E	xlink	28.3842	0	28.7064	0	-0.322207	FUSB8wt	0.0600144	0.0860584
HspB8:129:x:HspB8:133	FUSB8_K141E	looplink	29.3498	0	30.231	0	-0.881182	FUSB8wt	0.115979	0.163229
HspB8:129:x:HspB8:133	FUSB8_K141E	xlink	26.5404	0	25.4998	0	1.04055	FUSB8wt	0.000429803	0.000989849
HspB8:129:x:HspB8:142	FUSB8_K141E	looplink	29.381	0	30.1715	0	-0.790576	FUSB8wt	0.0300825	0.0457255
HspB8:129:x:HspB8:142	FUSB8_K141E	xlink	31.7029	0	27.2728	0	4.43006	FUSB8wt	8.85e-11	2.24e-09
HspB8:133	FUSB8_K141E	monolink	32.9308	0	32.776	0	0.154796	FUSB8wt	0.364147	0.453691
HspB8:133:x:HspB8:142	FUSB8_K141E	looplink	30.8119	0	26.6174	0	4.19449	FUSB8wt	5.06e-07	3.84e-06
HspB8:133:x:HspB8:142	FUSB8_K141E	xlink	28.5129	0	22.2501	1	6.26288	FUSB8wt	8e-09	1.01e-07
HspB8:142	FUSB8_K141E	monolink	31.5444	0	27.8912	0	3.65321	FUSB8wt	1.3e-10	2.47e-09
HspB8:142:x:HspB8:142	FUSB8_K141E	xlink	32.4247	0	22.3877	1	10.0369	FUSB8wt	5.34e-15	4.06e-13
HspB8:142:x:HspB8:146	FUSB8_K141E	looplink	22.3059	1	27.4085	0	-5.10264	FUSB8wt	0.000154073	0.000433687
HspB8:142:x:HspB8:147	FUSB8_K141E	looplink	22.2492	1	27.3116	0	-5.06231	FUSB8wt	0.000187539	0.0004751
HspB8:146:x:HspB8:147	FUSB8_K141E	looplink	22.5194	1	27.4085	0	-4.88907	FUSB8wt	0.000204133	0.000500454
